# Supplementary material
Source: PubMed Central journal article supplement (PMC3726219)
Supplement: NIHMS470610-supplement-001.pdf [file NIHMS470610-supplement-001.pdf]

# Mechanism of Alkoxy Groups Substitution by Grignard Reagents on Aromatic Rings and Experimental Verification of Theoretical Predictions of Anomalous Reactions.

Gonzalo Jiménez-Osés,<sup>†</sup> Anthony J. Brockway,<sup>‡</sup> Jared T. Shaw,<sup>‡,\*</sup> and K. N. Houk<sup>†,\*</sup>

<sup>†</sup> Department of Chemistry and Biochemistry, University of California, Los Angeles, Los Angeles, California 90095-1569, United States.

<sup>‡</sup> Department of Chemistry, One Shields Ave, University of California, Davis, California 95616, United States.

## SUPPORTING INFORMATION

### CONTENTS:

|                                                                                               |                      |
|-----------------------------------------------------------------------------------------------|----------------------|
| <b>Stoichiometry and calculated structures of Grignard–substrate reactant complexes .....</b> | <b>Page S2</b>       |
| <b>Resonance structures of adducts derived from compounds 1a and 9 .....</b>                  | <b>Page S3</b>       |
| <b><sup>1</sup>H and <sup>13</sup>C NMR Spectra .....</b>                                     | <b>Pages S4–S7</b>   |
| <b>Tables for energies, enthalpies, free energies, and entropies .....</b>                    | <b>Pages S8–S12</b>  |
| <b>Cartesian coordinates for the structures considered in this work .....</b>                 | <b>Pages S13–S64</b> |

**Figure S1.** Stoichiometry and structure of methyl Grignard–substrate (**1a**) reactant complexes calculated at the B3LYP/6-31G(d) level. Relative free energies (in kcal mol<sup>-1</sup>) include implicit solvation corrections calculated using the SMD polarizable continuum model and the internally stored parameters for tetrahydrofuran as implemented in Gaussian 09. Both explicitly solvated and unsolvated (energies in parentheses) CH<sub>3</sub>MgCl dimers have been considered as starting materials. The isolated reactants have been arbitrarily chosen as the zero level in the relative energies calculations. Both monomer (eq. 1) and dimer (eq. 2) states of the Grignard reagent in the reactant complex have been considered. As can be seen, monomer **1a**·CH<sub>3</sub>MgCl (**a**) is the most stable species.

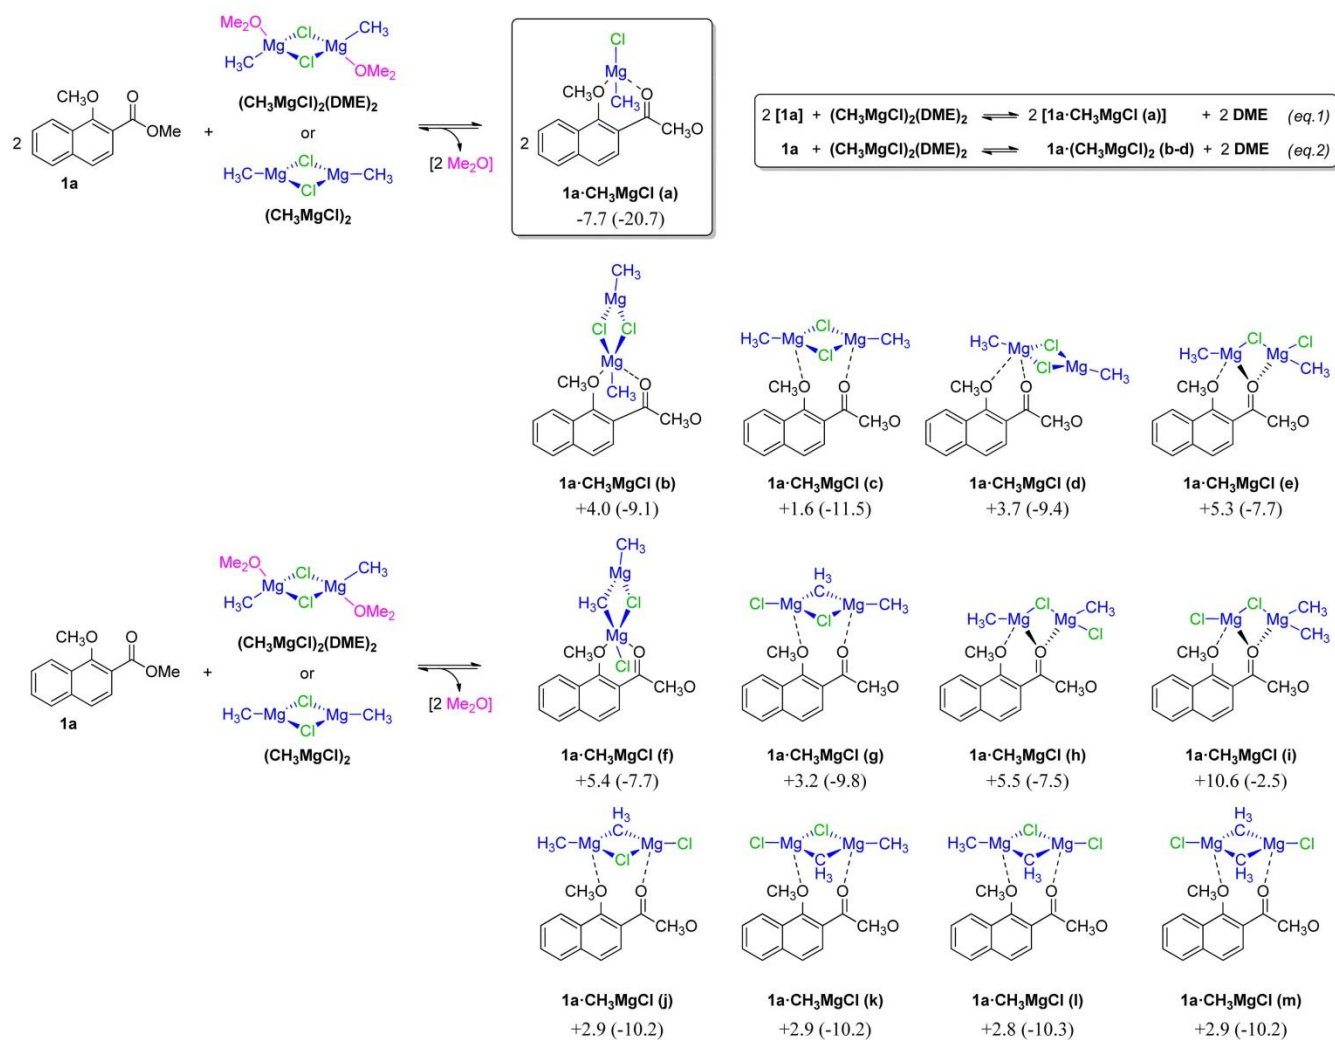

**Figure S2.** Resonance structures of the enolates derived from the reaction of methyl 1- and 3-methoxy-2-naphthoate (**1a** and **9**, respectively) with Grignard reagents (EtMgCl). The lack of enough resonance structures in **9-int** to preserve the aromaticity of one fused benzene ring (in red) precludes the formation of stable adducts after 1,4-addition, and drives the concerted elimination of the methoxy group in order to recover naphthalene aromaticity. On contrary, **1a-int** is stable enough to be located as a stationary point in the Potential Energy Surface of this reaction.

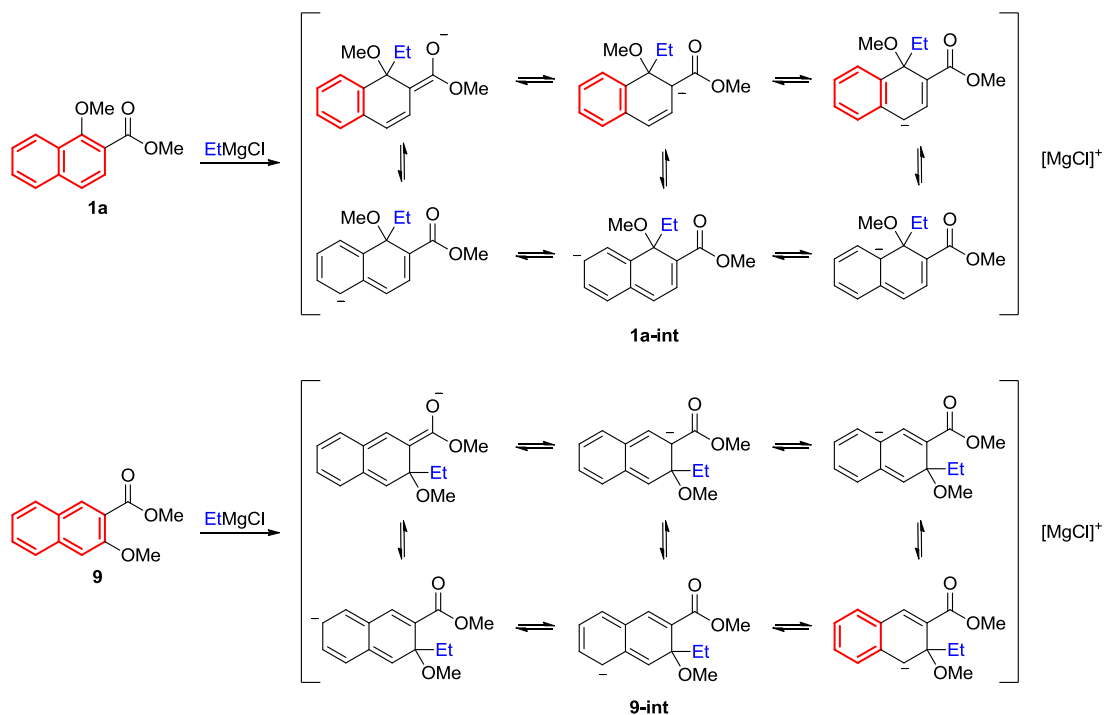

# $^1\text{H}$ and $^{13}\text{C}$ NMR Spectra

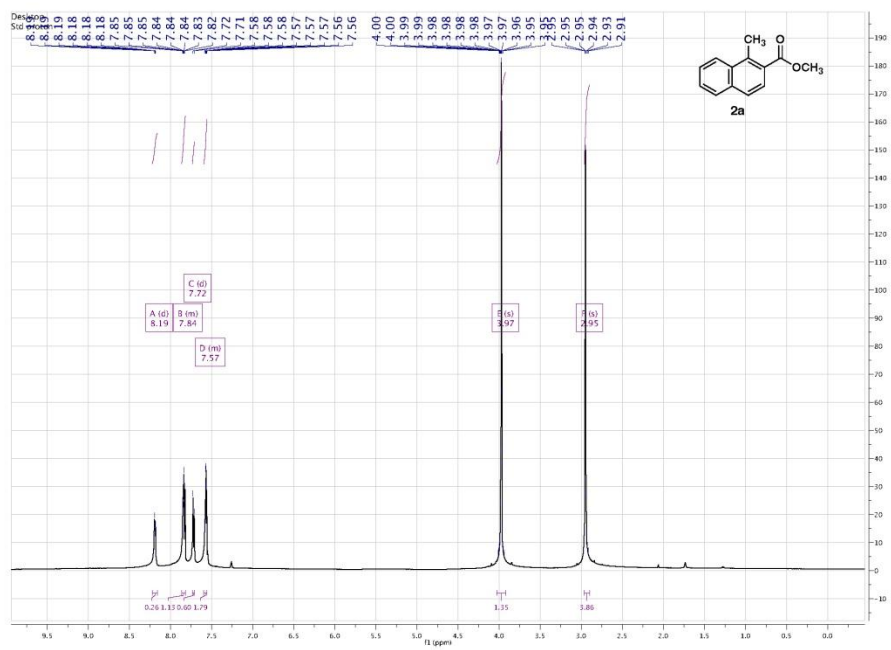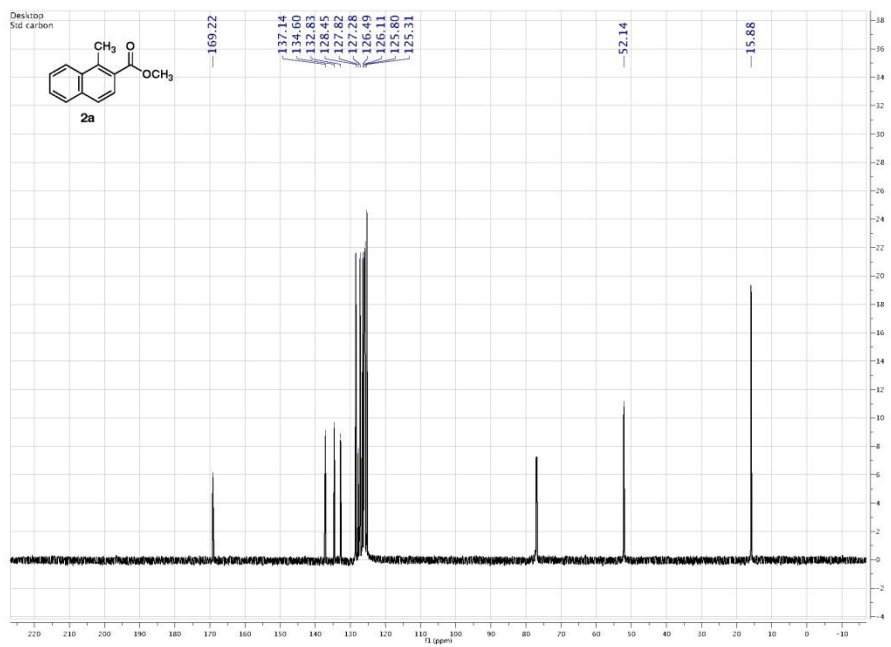

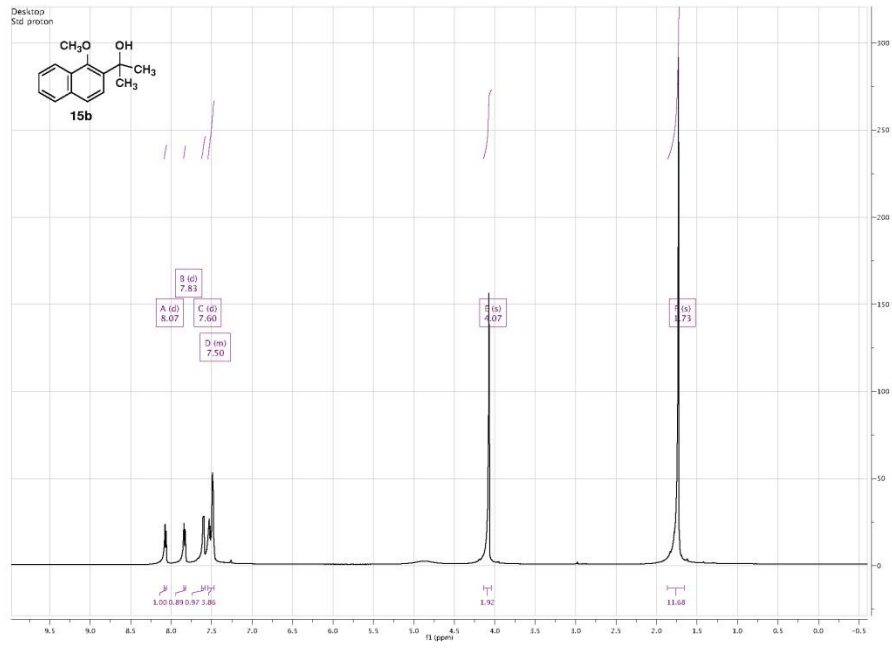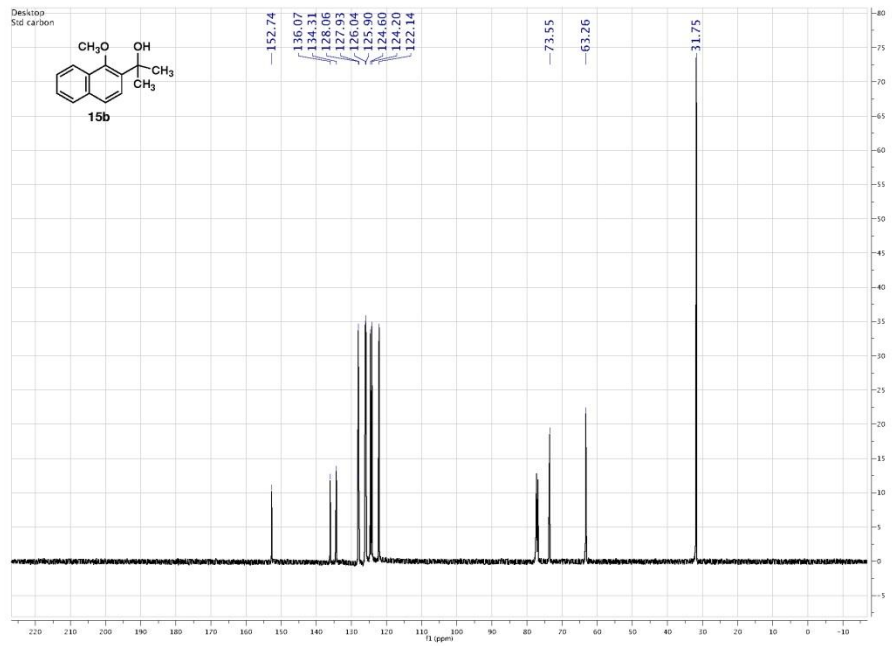



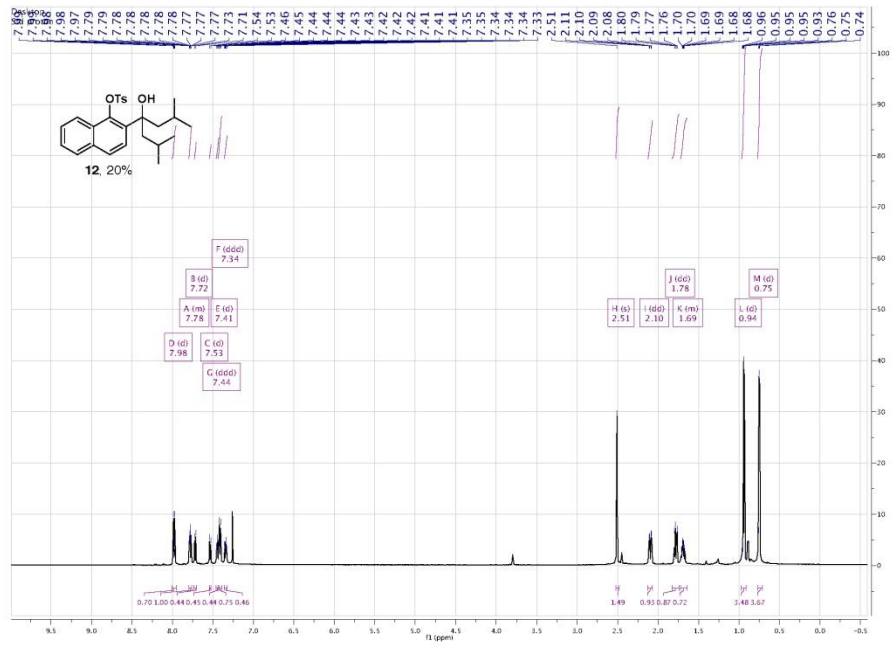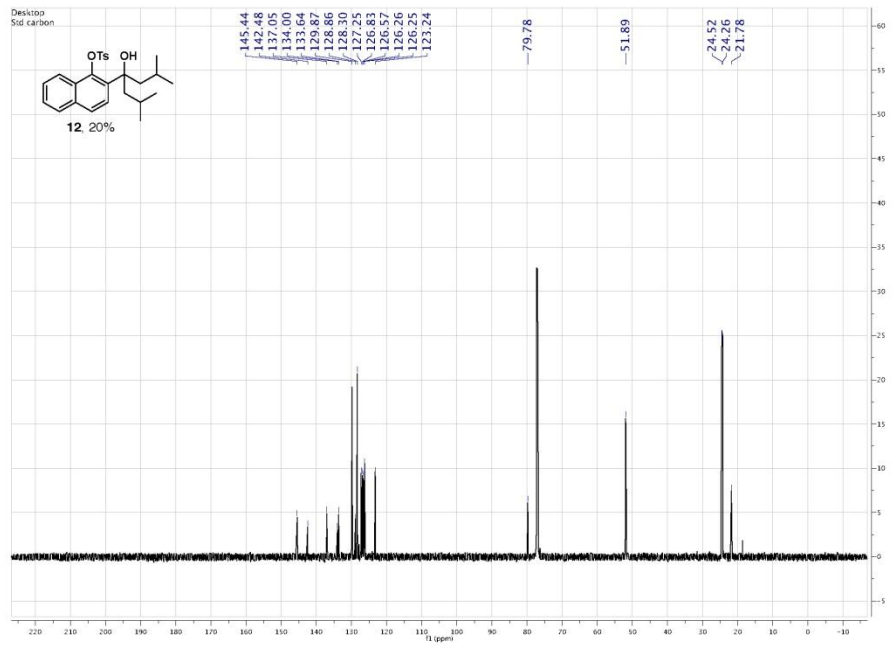

**Table S1.** B3LYP/6-31+G(d,p) absolute energies, enthalpies, free energies, entropies and lowest frequencies of the structures considered in this work

| Structure                                    | $E_{\text{elec}}$<br>(Hartree) <sup>a</sup> | $E_{\text{elec}} + \text{ZPE}$<br>(Hartree) <sup>a</sup> | $E$<br>(Hartree) <sup>a</sup> | $H$<br>(Hartree) <sup>b</sup> | $S$ (cal<br>$\text{mol}^{-1} \text{K}^{-1}$ ) <sup>b</sup> | $G$<br>(Hartree) <sup>b</sup> | Lowest<br>freq. ( $\text{cm}^{-1}$ ) | $AG_{\text{solv}}$<br>( $\text{kcal mol}^{-1}$ ) <sup>c</sup> |
|----------------------------------------------|---------------------------------------------|----------------------------------------------------------|-------------------------------|-------------------------------|------------------------------------------------------------|-------------------------------|--------------------------------------|---------------------------------------------------------------|
| Et <sub>2</sub> O                            | -155.025044                                 | -154.946956                                              | -154.944544                   | -154.943926                   | 58.7                                                       | -154.962195                   | 223.9                                | -1.4                                                          |
| (MeMgCl) <sub>2</sub>                        | -1400.586188                                | -1400.538562                                             | -1400.532126                  | -1400.531508                  | 98.7                                                       | -1400.559382                  | 19.3                                 | -16.2                                                         |
| (MeMgCl) <sub>2</sub> (DME) <sub>2</sub>     | -1710.698959                                | -1710.479171                                             | -1710.466912                  | -1710.466294                  | 142.3                                                      | -1710.505691                  | 8.2                                  | -11.6                                                         |
| (EtMgCl) <sub>2</sub>                        | -1479.199125                                | -1479.095526                                             | -1479.087822                  | -1479.087204                  | 113.5                                                      | -1479.117858                  | 8.3                                  | -17.8                                                         |
| (EtMgCl) <sub>2</sub> (DME) <sub>2</sub> _I  | -1789.311451                                | -1789.035082                                             | -1789.021477                  | -1789.020859                  | 154.0                                                      | -1789.062239                  | 14.2                                 | -12.7                                                         |
| (EtMgCl) <sub>2</sub> (DME) <sub>2</sub> _II | -1789.331403                                | -1789.034803                                             | -1789.021226                  | -1789.020608                  | 152.5                                                      | -1789.068032                  | 10.2                                 | -12.5                                                         |
|                                              |                                             |                                                          |                               |                               |                                                            |                               |                                      |                                                               |
| 1a_I                                         | -728.285253                                 | -728.075262                                              | -728.068579                   | -728.067961                   | 98.9                                                       | -728.097798                   | 37.5                                 | -8.4                                                          |
| 1a_II                                        | -728.284542                                 | -728.074964                                              | -728.068280                   | -728.067662                   | 99.3                                                       | -728.097451                   | 26.0                                 | -8.7                                                          |
| 1a·CH <sub>3</sub> MgCl (a)                  | -1428.600921                                | -1428.368648                                             | -1428.358611                  | -1428.357993                  | 124.5                                                      | -1428.394148                  | 27.4                                 | -18.3                                                         |
| 1a·CH <sub>3</sub> MgCl (b)                  | -2128.909540                                | -2128.643884                                             | -2128.630031                  | -2128.629413                  | 154.8                                                      | -2128.672448                  | 14.3                                 | -20.4                                                         |
| 1a·CH <sub>3</sub> MgCl (c)                  | -2128.917530                                | -2128.646903                                             | -2128.633516                  | -2128.632898                  | 147.2                                                      | -2128.675314                  | 14.5                                 | -17.6                                                         |
| 1a·CH <sub>3</sub> MgCl (d)                  | -2128.911145                                | -2128.645166                                             | -2128.631478                  | -2128.630860                  | 156.3                                                      | -2128.673401                  | 4.5                                  | -20.4                                                         |
| 1a·CH <sub>3</sub> MgCl (e)                  | -2128.907697                                | -2128.641049                                             | -2128.627738                  | -2128.627120                  | 146.9                                                      | -2128.669353                  | 22.6                                 | -20.3                                                         |
| 1a·CH <sub>3</sub> MgCl (f)                  | -2128.903897                                | -2128.642534                                             | -2128.629021                  | -2128.628403                  | 154.9                                                      | -2128.670630                  | 7.2                                  | -23.6                                                         |
| 1a·CH <sub>3</sub> MgCl (g)                  | -2128.910601                                | -2128.644642                                             | -2128.631328                  | -2128.630710                  | 147.6                                                      | -2128.672866                  | 13.0                                 | -20.6                                                         |
| 1a·CH <sub>3</sub> MgCl (h)                  | -2128.903211                                | -2128.640687                                             | -2128.627289                  | -2128.626671                  | 147.6                                                      | -2128.669065                  | 25.6                                 | -22.8                                                         |
| 1a·CH <sub>3</sub> MgCl (i)                  | -2128.895174                                | -2128.633402                                             | -2128.619816                  | -2128.619198                  | 152.2                                                      | -2128.661711                  | 9.2                                  | -23.0                                                         |
| 1a·CH <sub>3</sub> MgCl (j)                  | -2128.910705                                | -2128.644826                                             | -2128.631544                  | -2128.630926                  | 146.5                                                      | -2128.673192                  | 17.2                                 | -20.7                                                         |
| 1a·CH <sub>3</sub> MgCl (k)                  | -2128.910796                                | -2128.645059                                             | -2128.631762                  | -2128.631144                  | 147.0                                                      | -2128.673336                  | 15.4                                 | -20.8                                                         |
| 1a·CH <sub>3</sub> MgCl (l)                  | -2128.911465                                | -2128.644720                                             | -2128.631626                  | -2128.631008                  | 144.2                                                      | -2128.673035                  | 20.4                                 | -20.3                                                         |
| 1a·CH <sub>3</sub> MgCl (m)                  | -2128.907482                                | -2128.645130                                             | -2128.632432                  | -2128.631814                  | 142.2                                                      | -2128.673055                  | -60.0                                | -22.9                                                         |
| 1a-TSOMe                                     | -1428.566735                                | -1428.329010                                             | -1428.319950                  | -1428.319332                  | 114.9                                                      | -1428.354013                  | -371.5                               | -14.7                                                         |
| 1a-TSCO                                      | -1428.567427                                | -1428.329825                                             | -1428.320921                  | -1428.320303                  | 114.0                                                      | -1428.354581                  | -341.1                               | -15.0                                                         |
| 1a-intOMe                                    | -1428.612061                                | -1428.374654                                             | -1428.365541                  | -1428.364923                  | 116.6                                                      | -1428.399514                  | 27.0                                 | -16.9                                                         |
| 1a-intCO                                     | -1428.621287                                | -1428.381764                                             | -1428.373249                  | -1428.372631                  | 111.3                                                      | -1428.405978                  | 46.3                                 | -16.2                                                         |
| 1a-TS2OMe                                    | -1428.611586                                | -1428.374371                                             | -1428.365402                  | -1428.364784                  | 115.5                                                      | -1428.399200                  | -194.6                               | -16.4                                                         |
| 1a-TS2CO                                     | -1428.618548                                | -1428.380121                                             | -1428.371185                  | -1428.370567                  | 114.2                                                      | -1428.404901                  | -60.3                                | -15.4                                                         |
| 1a-prodOMe                                   | -1428.646092                                | -1428.408150                                             | -1428.397941                  | -1428.397323                  | 129.3                                                      | -1428.433710                  | 12.8                                 | -16.0                                                         |
| 1a-prodCO                                    | -1428.631944                                | -1428.400628                                             | -1428.390389                  | -1428.389771                  | 127.6                                                      | -1428.426098                  | 22.3                                 | -19.5                                                         |
|                                              |                                             |                                                          |                               |                               |                                                            |                               |                                      |                                                               |
| 1a-TSOMe (b)                                 | -2128.880444                                | -2128.608767                                             | -2128.596077                  | -2128.595459                  | 144.1                                                      | -2128.636514                  | -387.1                               | -16.7                                                         |
| 1a-TSOMe (k)                                 | -2128.861478                                | -2128.596804                                             | -2128.584017                  | -2128.583399                  | 144.7                                                      | -2128.624656                  | -379.3                               | -21.1                                                         |
| 1a-TSOMe (l)                                 | -2128.855381                                | -2128.590884                                             | -2128.578122                  | -2128.577504                  | 144.5                                                      | -2128.618807                  | -356.6                               | -21.1                                                         |
| 1a-TSCO (b)                                  | -2128.878040                                | -2128.608108                                             | -2128.595622                  | -2128.595004                  | 143.1                                                      | -2128.635535                  | -341.7                               | -18.1                                                         |
| 1a-TSCO (k)                                  | -2128.869300                                | -2128.606992                                             | -2128.594503                  | -2128.593885                  | 141.6                                                      | -2128.634434                  | -307.3                               | -23.1                                                         |
| 1a-TSCO (l)                                  | -2128.862086                                | -2128.593806                                             | -2128.581392                  | -2128.580774                  | 139.7                                                      | -2128.621356                  | -404.7                               | -19.2                                                         |
|                                              |                                             |                                                          |                               |                               |                                                            |                               |                                      |                                                               |
| 1a·CH <sub>3</sub> MgCl(DME) (d)_I           | -2283.964335                                | -2283.613123                                             | -2283.596446                  | -2283.595828                  | 175.6                                                      | -2283.643619                  | 8.1                                  | -18.4                                                         |
| 1a·CH <sub>3</sub> MgCl(DME) (d)_II          | -2283.959935                                | -2283.611617                                             | -2283.594938                  | -2283.594320                  | 174.4                                                      | -2283.642103                  | 13.3                                 | -20.2                                                         |
| 1a·CH <sub>3</sub> MgCl(DME) (d')_I          | -2283.956372                                | -2283.606636                                             | -2283.590053                  | -2283.589435                  | 172.4                                                      | -2283.637273                  | 16.0                                 | -19.6                                                         |
| 1a·CH <sub>3</sub> MgCl(DME) (d')_II         | -2283.952315                                | -2283.607740                                             | -2283.591391                  | -2283.590773                  | 169.4                                                      | -2283.638216                  | 16.6                                 | -23.1                                                         |
| 1a-TS'OMe_I                                  | -2283.910844                                | -2283.561659                                             | -2283.546236                  | -2283.545618                  | 161.6                                                      | -2283.591585                  | -517.4                               | -20.1                                                         |
| 1a-TS'OMe_II                                 | -2283.911547                                | -2283.560984                                             | -2283.545510                  | -2283.544892                  | 163.4                                                      | -2283.590832                  | -518.9                               | -19.3                                                         |
| 1a-TS'CO_I                                   | -2283.917410                                | -2283.568223                                             | -2283.552705                  | -2283.552087                  | 162.5                                                      | -2283.598214                  | -506.4                               | -20.1                                                         |



|                  |              |              |              |              |       |              |        |       |
|------------------|--------------|--------------|--------------|--------------|-------|--------------|--------|-------|
| 1a-TS'CO_II      | -2283.917853 | -2283.568722 | -2283.553187 | -2283.552569 | 164.7 | -2283.598649 | -507.0 | -20.2 |
| 1a-EtMgCl (a)_I  | -1467.907719 | -1467.646655 | -1467.636133 | -1467.635515 | 127.1 | -1467.672581 | 30.6   | -18.6 |
| 1a-EtMgCl (a)_II | -1467.907540 | -1467.646870 | -1467.636258 | -1467.635640 | 128.5 | -1467.672778 | 27.5   | -18.8 |
| 1a-TSOMe-I       | -1467.878281 | -1467.612207 | -1467.602453 | -1467.601835 | 119.7 | -1467.637781 | -309.2 | -15.0 |
| 1a-TSOMe-II      | -1467.876416 | -1467.609840 | -1467.600116 | -1467.599498 | 119.4 | -1467.635401 | -310.0 | -14.8 |
| 1a-TSOMe-III     | -1467.877525 | -1467.611488 | -1467.601660 | -1467.601042 | 120.8 | -1467.637057 | -312.4 | -15.0 |
| 1a-TSCO_I        | -1467.876340 | -1467.609864 | -1467.600373 | -1467.599755 | 118.0 | -1467.635025 | -294.6 | -15.2 |
| 1a-TSCO_II       | -1467.875984 | -1467.608893 | -1467.599310 | -1467.598692 | 118.7 | -1467.634187 | -258.2 | -14.7 |
| 1a-TSCO_III      | -1467.875875 | -1467.609414 | -1467.599794 | -1467.599176 | 119.2 | -1467.634731 | -284.3 | -15.1 |
| 1a-intOMe-I      | -1467.925354 | -1467.658894 | -1467.649103 | -1467.648485 | 120.9 | -1467.684388 | 29.6   | -16.7 |
| 1a-intCO-I       | -1467.935909 | -1467.667866 | -1467.658541 | -1467.657923 | 116.0 | -1467.692984 | 49.1   | -16.2 |
| 1a-intCO-II      | -1467.929919 | -1467.661752 | -1467.652616 | -1467.651998 | 114.9 | -1467.686579 | 46.4   | -16.4 |
| 1a-TS2OMe-I      | -1467.924755 | -1467.658578 | -1467.648920 | -1467.648302 | 120.0 | -1467.684087 | -192.1 | -16.3 |
| 1a-TS2OMe-II     | -1467.916555 | -1467.650544 | -1467.640768 | -1467.640150 | 121.4 | -1467.676108 | -249.4 | -16.3 |
| 1a-TS2CO_I       | -1467.932451 | -1467.665118 | -1467.655433 | -1467.654815 | 119.7 | -1467.690508 | -84.0  | -15.3 |
| 1a-TS2CO_II      | -1467.931003 | -1467.663670 | -1467.654040 | -1467.653422 | 119.1 | -1467.689118 | -70.4  | -15.4 |
| 1a-prodOMe-I     | -1467.956157 | -1467.690448 | -1467.679241 | -1467.678623 | 138.7 | -1467.716649 | 12.2   | -16.5 |
| 1a-prodOMe-II    | -1467.956157 | -1467.690451 | -1467.679244 | -1467.678626 | 138.7 | -1467.716652 | 12.3   | -16.5 |
| 1a-prodCO-I      | -1467.944757 | -1467.684524 | -1467.673645 | -1467.673027 | 131.9 | -1467.710548 | 29.2   | -19.6 |
| 1a-prodCO-II     | -1467.944545 | -1467.684792 | -1467.673908 | -1467.673290 | 132.0 | -1467.710818 | 29.1   | -19.9 |
| 1a-prodCO-III    | -1467.946260 | -1467.686369 | -1467.675497 | -1467.674879 | 131.3 | -1467.712496 | 29.0   | -19.6 |
| 7_I              | -690.168161  | -689.963480  | -689.956908  | -689.956290  | 97.7  | -689.985905  | 55.7   | -7.9  |
| 7_II             | -690.164662  | -689.961232  | -689.954664  | -689.954045  | 97.9  | -689.983551  | 44.1   | -8.6  |
| 7-EtMgCl_I       | -1429.787806 | -1429.534535 | -1429.524112 | -1429.523494 | 128.0 | -1429.560095 | 21.6   | -19.7 |
| 7-EtMgCl_II      | -1429.787332 | -1429.534328 | -1429.523844 | -1429.523226 | 129.3 | -1429.559920 | 19.7   | -19.9 |
| 7-EtMgCl_III     | -1429.787752 | -1429.533743 | -1429.523273 | -1429.522655 | 128.3 | -1429.559483 | 21.5   | -19.2 |
| 7-EtMgCl_IV      | -1429.788019 | -1429.533734 | -1429.523227 | -1429.522609 | 130.1 | -1429.559375 | 13.1   | -18.9 |
| 7-TSOMe-I        | -1429.762365 | -1429.502958 | -1429.493230 | -1429.492612 | 119.9 | -1429.528411 | -273.0 | -15.2 |
| 7-TSOMe-II       | -1429.760011 | -1429.500605 | -1429.490860 | -1429.490242 | 119.8 | -1429.526099 | -274.1 | -15.2 |
| 7-TSCO-I         | -1429.750954 | -1429.491745 | -1429.482193 | -1429.481575 | 118.7 | -1429.516918 | -320.7 | -15.5 |
| 7-TSCO-II        | -1429.750303 | -1429.491192 | -1429.481469 | -1429.480851 | 120.1 | -1429.516602 | -306.9 | -15.3 |
| 7-intOMe-I       | -1429.819581 | -1429.558117 | -1429.548456 | -1429.547838 | 120.2 | -1429.583516 | 26.2   | -16.0 |
| 7-intOMe-II      | -1429.816225 | -1429.555074 | -1429.545435 | -1429.544817 | 120.1 | -1429.580453 | 25.9   | -16.3 |
| 7-intCO-I        | -1429.793207 | -1429.534222 | -1429.524675 | -1429.524057 | 120.7 | -1429.559409 | 19.2   | -17.7 |
| 7-intCO-II       | -1429.798925 | -1429.540425 | -1429.530871 | -1429.530253 | 119.9 | -1429.565643 | 30.0   | -18.0 |
| 7-intCO-III      | -1429.813738 | -1429.550814 | -1429.541364 | -1429.540746 | 117.4 | -1429.576057 | 39.1   | -15.0 |
| 7-intCO-IV       | -1429.807341 | -1429.542895 | -1429.533432 | -1429.532814 | 118.1 | -1429.567978 | 35.6   | -14.1 |
| 7'_I             | -689.587851  | -689.458155  | -689.451723  | -689.451105  | 96.4  | -689.480558  | 60.5   | -45.6 |
| 7'_II            | -689.586781  | -689.457585  | -689.451133  | -689.450515  | 96.5  | -689.479978  | 49.0   | -45.9 |
| 7'-EtMgCl_I      | -1429.246932 | -1429.049029 | -1429.038744 | -1429.038126 | 125.5 | -1429.074788 | 28.1   | -45.3 |
| 7'-EtMgCl_II     | -1429.246892 | -1429.049211 | -1429.038867 | -1429.038249 | 126.6 | -1429.074965 | 24.7   | -45.4 |
| 7'-EtMgCl_III    | -1429.249471 | -1429.050003 | -1429.039593 | -1429.038975 | 128.0 | -1429.075764 | 17.1   | -44.3 |
| 7'-EtMgCl_IV     | -1429.249405 | -1429.049809 | -1429.039414 | -1429.038796 | 127.8 | -1429.075510 | 19.7   | -44.2 |
| 7'-TSCO-I        | -1429.194984 | -1428.996791 | -1428.987435 | -1428.986817 | 117.4 | -1429.021805 | -371.2 | -44.8 |
| 7'-TSCO-II       | -1429.193084 | -1428.995746 | -1428.986341 | -1428.985723 | 117.7 | -1429.020950 | -364.0 | -45.3 |
| 7'-TSOMe-I       | -1429.177080 | -1428.979475 | -1428.969976 | -1428.969358 | 117.7 | -1429.004854 | -467.8 | -44.4 |
| 7'-TSOMe-II      | -1429.174419 | -1428.977388 | -1428.967830 | -1428.967212 | 118.4 | -1429.002796 | -470.2 | -44.9 |

|                     |              |              |              |              |       |              |        |       |
|---------------------|--------------|--------------|--------------|--------------|-------|--------------|--------|-------|
| 9_I                 | -728.288062  | -728.079483  | -728.072881  | -728.072263  | 99.7  | -728.101925  | 18.0   | -9.5  |
| 9_II                | -728.287357  | -728.079448  | -728.072807  | -728.072189  | 99.3  | -728.102019  | 31.2   | -9.8  |
| 9-EtMgCl_I          | -1467.910982 | -1467.651151 | -1467.640600 | -1467.639982 | 130.3 | -1467.676993 | 15.0   | -19.5 |
| 9-EtMgCl_II         | -1467.911371 | -1467.650861 | -1467.640394 | -1467.639776 | 128.3 | -1467.676674 | 19.8   | -19.2 |
| 9-EtMgCl_III        | -1467.911132 | -1467.651035 | -1467.640534 | -1467.639916 | 128.5 | -1467.676864 | 22.3   | -19.4 |
| 9-TSOMe-I           | -1467.867755 | -1467.602408 | -1467.592708 | -1467.592090 | 119.6 | -1467.627955 | -353.1 | -15.3 |
| 9-TSOMe-II          | -1467.866575 | -1467.601445 | -1467.591686 | -1467.591068 | 120.6 | -1467.626957 | -363.2 | -15.4 |
| 9-TSCO-I            | -1467.882813 | -1467.616643 | -1467.607212 | -1467.606594 | 118.0 | -1467.641794 | -287.0 | -15.6 |
| 9-TSCO-II           | -1467.881576 | -1467.615802 | -1467.606218 | -1467.605600 | 119.5 | -1467.641091 | -281.2 | -15.7 |
| 9-intOMe-I          | -1467.960744 | -1467.695414 | -1467.684366 | -1467.683748 | 136.8 | -1467.721596 | 9.2    | -16.7 |
| 9-intOMe-II         | -1467.963896 | -1467.697833 | -1467.686979 | -1467.686361 | 135.2 | -1467.723843 | 8.8    | -16.5 |
| 9-intOMe-III        | -1467.960434 | -1467.696223 | -1467.685166 | -1467.684548 | 136.6 | -1467.722453 | 11.3   | -17.4 |
| 9-intCO-I           | -1467.926629 | -1467.662326 | -1467.652666 | -1467.652048 | 121.4 | -1467.687562 | 23.5   | -18.4 |
| 9-intCO-II          | -1467.928505 | -1467.663668 | -1467.654098 | -1467.653480 | 120.4 | -1467.688926 | 25.1   | -18.2 |
| 9-intCO-III         | -1467.923996 | -1467.659167 | -1467.649508 | -1467.648890 | 122.1 | -1467.684296 | 22.7   | -18.2 |
|                     |              |              |              |              |       |              |        |       |
| 9-iPrMgCl_I         | -1507.221396 | -1506.933408 | -1506.922262 | -1506.921644 | 134.2 | -1506.959626 | 16.8   | -19.7 |
| 9-iPrMgCl_II        | -1507.221653 | -1506.933303 | -1506.922130 | -1506.921512 | 134.6 | -1506.959464 | 15.1   | -19.4 |
| 9-iPrMgCl_III       | -1507.221398 | -1506.933342 | -1506.922192 | -1506.921574 | 134.7 | -1506.959538 | 12.2   | -19.6 |
| 9'-TSOMe-I          | -1507.178714 | -1506.885379 | -1506.875037 | -1506.874419 | 124.1 | -1506.911255 | -306.4 | -15.5 |
| 9'-TSOMe-II         | -1507.175644 | -1506.880684 | -1506.870386 | -1506.869768 | 123.3 | -1506.906586 | -266.1 | -14.7 |
| 9'-TSOMe-III        | -1507.174060 | -1506.880130 | -1506.869874 | -1506.869256 | 123.1 | -1506.906039 | -258.3 | -15.2 |
| 9'-TSCO-I           | -1507.192325 | -1506.898277 | -1506.888092 | -1506.887474 | 123.4 | -1506.923882 | -242.8 | -15.7 |
| 9'-TSCO-II          | -1507.191522 | -1506.895752 | -1506.885631 | -1506.885013 | 122.2 | -1506.921469 | -210.0 | -14.9 |
| 9'-TSCO-III         | -1507.190166 | -1506.895568 | -1506.885557 | -1506.884939 | 121.7 | -1506.921121 | -234.4 | -15.5 |
|                     |              |              |              |              |       |              |        |       |
| 11_I                | -1276.873145 | -1276.659426 | -1276.651270 | -1276.650652 | 111.3 | -1276.683382 | 18.4   | -12.2 |
| 11_II               | -1276.869240 | -1276.657820 | -1276.649661 | -1276.649043 | 110.7 | -1276.681684 | 31.9   | -13.6 |
| 11_III              | -1276.865113 | -1276.656267 | -1276.648116 | -1276.647498 | 111.0 | -1276.680137 | 27.3   | -15.2 |
| 11_IV               | -1276.868075 | -1276.657418 | -1276.649300 | -1276.648682 | 110.1 | -1276.681307 | 35.3   | -14.1 |
| 11-EtMgCl_I         |              |              |              |              |       |              |        |       |
| 11-EtMgCl_II        | -2016.485776 | -2016.218943 | -2016.206760 | -2016.206142 | 139.8 | -2016.246117 | 30.0   | -20.6 |
| 11-EtMgCl_III       | -2016.485439 | -2016.219160 | -2016.206910 | -2016.206292 | 140.9 | -2016.246362 | 27.5   | -20.9 |
| 11-EtMgCl (b)_I     | -2016.486634 | -2016.225440 | -2016.213346 | -2016.212728 | 141.0 | -2016.252493 | 14.8   | -24.3 |
| 11-EtMgCl (b)_II    | -2016.486953 | -2016.225462 | -2016.213397 | -2016.212779 | 140.2 | -2016.252464 | 17.6   | -24.2 |
| 11-EtMgCl (b)_III   | -2016.488330 | -2016.219952 | -2016.208046 | -2016.207428 | 139.0 | -2016.246854 | 11.5   | -19.9 |
| 11-EtMgCl(DME)_I    | -2171.531901 | -2171.180513 | -2171.165271 | -2171.164653 | 162.6 | -2171.210013 | 20.0   | -19.3 |
| 11-EtMgCl(DME)_II   | -2171.532221 | -2171.182186 | -2171.166807 | -2171.166189 | 164.1 | -2171.211624 | 19.8   | -20.0 |
| 11-EtMgCl(DME)_III  | -2171.532609 | -2171.182395 | -2171.167187 | -2171.166569 | 162.3 | -2171.211736 | 17.2   | -20.0 |
| 11-EtMgCl(DME)_IV   | -2171.532680 | -2171.182843 | -2171.167412 | -2171.166794 | 166.0 | -2171.212269 | 13.4   | -20.0 |
| 11-EtMgCl(DME)_IX   | -2171.529094 | -2171.180399 | -2171.165101 | -2171.164483 | 163.4 | -2171.209734 | 20.2   | -20.9 |
| 11-EtMgCl(DME)_V    | -2171.526400 | -2171.178738 | -2171.163625 | -2171.163007 | 161.0 | -2171.208098 | 15.9   | -21.8 |
| 11-EtMgCl(DME)_VI   | -2171.519341 | -2171.178571 | -2171.163042 | -2171.162424 | 169.1 | -2171.207896 | 7.4    | -25.7 |
| 11-EtMgCl(DME)_VII  | -2171.524006 | -2171.178552 | -2171.163376 | -2171.162758 | 161.1 | -2171.208098 | 18.8   | -22.9 |
| 11-EtMgCl(DME)_VIII | -2171.526768 | -2171.179871 | -2171.164521 | -2171.163903 | 167.0 | -2171.209147 | 8.7    | -22.1 |
| 11-EtMgCl(DME)_X    | -2171.527742 | -2171.180013 | -2171.164751 | -2171.164133 | 163.9 | -2171.209226 | 15.6   | -21.6 |
| 11-EtMgCl(DME)_XI   | -2171.529025 | -2171.181619 | -2171.166161 | -2171.165543 | 167.5 | -2171.210991 | 11.7   | -21.6 |
| 11-TSOMe-I          | -2016.454759 | -2016.185103 | -2016.173759 | -2016.173141 | 132.0 | -2016.211689 | -330.6 | -18.4 |
| 11-TSOMe-II         | -2016.449768 | -2016.180188 | -2016.168840 | -2016.168222 | 132.0 | -2016.206882 | -343.6 | -18.5 |
| 11-TSOMe-III        | -2016.450466 | -2016.182258 | -2016.170832 | -2016.170214 | 133.5 | -2016.208858 | -341.9 | -19.3 |
| 11-TSOMe-IV         | -2016.454776 | -2016.185127 | -2016.173794 | -2016.173176 | 131.9 | -2016.211705 | -328.9 | -18.4 |

|                 |              |              |              |              |       |              |        |       |
|-----------------|--------------|--------------|--------------|--------------|-------|--------------|--------|-------|
| 11-TSOMe-V      | -2016.451583 | -2016.182836 | -2016.171540 | -2016.170922 | 131.7 | -2016.209401 | -344.6 | -19.1 |
| 11-TSCO-I       | -2016.448920 | -2016.180194 | -2016.169052 | -2016.168434 | 130.2 | -2016.206656 | -269.9 | -19.3 |
| 11-TSCO-II      | -2016.448645 | -2016.180508 | -2016.169199 | -2016.168581 | 132.0 | -2016.207143 | -254.4 | -19.5 |
| 11-TSCO-III     | -2016.459516 | -2016.191262 | -2016.180366 | -2016.179748 | 127.9 | -2016.217708 | -235.7 | -19.9 |
| 11-TSCO-IV      | -2016.449699 | -2016.178123 | -2016.166944 | -2016.166326 | 130.5 | -2016.204789 | -296.2 | -17.5 |
| 11-TSCO-V       | -2016.449116 | -2016.180954 | -2016.169698 | -2016.169080 | 131.5 | -2016.207516 | -246.9 | -19.5 |
| 11-TSCO-VI      | -2016.458218 | -2016.188867 | -2016.177894 | -2016.177276 | 128.6 | -2016.215371 | -195.2 | -19.2 |
| 11-TSCO-VII     | -2016.449880 | -2016.177218 | -2016.166090 | -2016.165472 | 130.0 | -2016.203832 | -263.0 | -16.9 |
| 11-TSCO-VIII    | -2016.457860 | -2016.190425 | -2016.179446 | -2016.178828 | 128.8 | -2016.216839 | -235.4 | -20.3 |
| 11-TSCO-IX      | -2016.449754 | -2016.178325 | -2016.167236 | -2016.166618 | 129.8 | -2016.204822 | -301.8 | -17.7 |
|                 |              |              |              |              |       |              |        |       |
| 13a_I           | -653.051910  | -652.849176  | -652.843041  | -652.842423  | 94.6  | -652.871070  | 41.7   | -9.4  |
| 13a_II          | -653.053878  | -652.851290  | -652.845206  | -652.844588  | 94.2  | -652.873188  | 43.1   | -9.6  |
| 13a·EtMgCl_I    | -1392.674490 | -1392.421946 | -1392.411919 | -1392.411301 | 124.0 | -1392.447299 | 28.2   | -20.4 |
| 13a·EtMgCl_II   | -1392.674714 | -1392.421553 | -1392.411593 | -1392.410975 | 123.2 | -1392.446898 | 29.8   | -20.0 |
| 13a·EtMgCl_III  | -1392.674714 | -1392.421555 | -1392.411593 | -1392.410975 | 123.2 | -1392.446898 | 29.6   | -20.0 |
| 13a-TSOMe-I     | -1392.651525 | -1392.392020 | -1392.382847 | -1392.382229 | 115.5 | -1392.417011 | -284.9 | -15.8 |
| 13a-TSOMe-II    | -1392.649772 | -1392.390185 | -1392.380974 | -1392.380356 | 115.8 | -1392.415286 | -291.6 | -15.8 |
| 13a-TSCO-I      | -1392.650210 | -1392.390569 | -1392.381591 | -1392.380973 | 114.6 | -1392.415120 | -203.5 | -16.1 |
| 13a-TSCO-II     | -1392.651246 | -1392.391531 | -1392.382594 | -1392.381976 | 114.0 | -1392.416182 | -222.5 | -16.1 |
|                 |              |              |              |              |       |              |        |       |
| 13a·MeMgCl      | -1353.367691 | -1353.143612 | -1353.134136 | -1353.133518 | 119.8 | -1353.168614 | 34.6   | -19.8 |
| 13a'-TS'OMe     | -1353.340005 | -1353.109123 | -1353.100601 | -1353.099983 | 111.0 | -1353.133579 | -345.5 | -15.6 |
| 13a-TS'CO       | -1353.341783 | -1353.110943 | -1353.102682 | -1353.102064 | 109.2 | -1353.135029 | -282.6 | -16.0 |
|                 |              |              |              |              |       |              |        |       |
| 13a_I           | -770.993528  | -770.706898  | -770.698675  | -770.698057  | 111.7 | -770.730834  | 22.6   | -10.7 |
| 13a_II          | -770.995244  | -770.708915  | -770.700721  | -770.700103  | 111.3 | -770.732839  | 21.9   | -10.9 |
| 13a_III         | -770.992028  | -770.704709  | -770.696606  | -770.695988  | 111.2 | -770.728435  | 17.7   | -10.5 |
| 13a_IV          | -770.993603  | -770.707025  | -770.698827  | -770.698209  | 112.0 | -770.730889  | 21.8   | -10.9 |
| 13a·EtMgCl_I    | -1510.616114 | -1510.279415 | -1510.267315 | -1510.266697 | 140.2 | -1510.306610 | 23.3   | -21.5 |
| 13a·EtMgCl_II   | -1510.616293 | -1510.279175 | -1510.267036 | -1510.266418 | 141.0 | -1510.306319 | 19.3   | -21.2 |
| 13a·EtMgCl_III  | -1510.615807 | -1510.279483 | -1510.267218 | -1510.266600 | 143.8 | -1510.306647 | 15.8   | -21.5 |
| 13a·EtMgCl_IV   | -1510.615109 | -1510.278354 | -1510.266289 | -1510.265671 | 140.9 | -1510.305405 | 20.0   | -21.7 |
| 13a·EtMgCl_V    | -1510.615176 | -1510.277777 | -1510.265730 | -1510.265112 | 140.7 | -1510.304843 | 20.0   | -21.3 |
| 13a·EtMgCl_VI   | -1510.614687 | -1510.278320 | -1510.266140 | -1510.265522 | 143.0 | -1510.305421 | 18.7   | -21.8 |
| 13a·EtMgCl_VII  | -1510.614053 | -1510.276518 | -1510.264479 | -1510.263861 | 140.4 | -1510.303447 | 21.9   | -21.2 |
| 13a·EtMgCl_VIII | -1510.614235 | -1510.275888 | -1510.263911 | -1510.263293 | 139.5 | -1510.302825 | 23.8   | -20.8 |
| 13a·EtMgCl_IX   | -1510.613877 | -1510.276122 | -1510.264090 | -1510.263472 | 140.2 | -1510.303121 | 25.1   | -21.1 |
| 13a-TSOMe-I     | -1510.592059 | -1510.248664 | -1510.237362 | -1510.236744 | 132.6 | -1510.275446 | -284.1 | -17.0 |
| 13a-TSOMe-II    | -1510.590341 | -1510.246612 | -1510.235298 | -1510.234680 | 132.9 | -1510.273408 | -292.6 | -16.9 |
| 13a-TSOMe-III   | -1510.591964 | -1510.248392 | -1510.237134 | -1510.236516 | 133.3 | -1510.275064 | -280.8 | -17.1 |
| 13a-TSOMe-IV    | -1510.590070 | -1510.246477 | -1510.235167 | -1510.234549 | 133.9 | -1510.273226 | -292.1 | -17.1 |
| 13a-TSOMe-V     | -1510.592463 | -1510.248494 | -1510.237268 | -1510.236650 | 132.1 | -1510.275193 | -287.8 | -16.9 |
| 13a-TSOMe-VI    | -1510.590910 | -1510.247105 | -1510.235833 | -1510.235215 | 133.3 | -1510.273808 | -289.4 | -17.0 |
| 13a-TSCO-I      | -1510.590974 | -1510.246596 | -1510.235548 | -1510.234930 | 130.2 | -1510.272949 | -214.0 | -16.9 |
| 13a-TSCO-II     | -1510.589895 | -1510.245776 | -1510.234670 | -1510.234052 | 131.2 | -1510.272150 | -219.2 | -17.0 |
| 13a-TSCO-III    | -1510.590935 | -1510.246758 | -1510.235709 | -1510.235091 | 130.4 | -1510.273196 | -197.2 | -17.1 |
| 13a-TSCO-IV     | -1510.591606 | -1510.247442 | -1510.236380 | -1510.235762 | 130.4 | -1510.273921 | -211.3 | -17.1 |
| 13a-TSCO-V      | -1510.583028 | -1510.238230 | -1510.227332 | -1510.226714 | 128.7 | -1510.264585 | -204.4 | -16.9 |
| 13a-TSCO-VI     | -1510.584547 | -1510.240469 | -1510.229510 | -1510.228892 | 129.4 | -1510.266855 | -221.8 | -17.2 |
|                 |              |              |              |              |       |              |        |       |

|                                       |              |              |              |              |       |              |        |       |
|---------------------------------------|--------------|--------------|--------------|--------------|-------|--------------|--------|-------|
| <b>13c_I</b>                          | -613.731930  | -613.555803  | -613.550366  | -613.549748  | 89.6  | -613.577098  | 45.2   | -8.5  |
| <b>13c_II</b>                         | -613.734256  | -613.559088  | -613.553660  | -613.553042  | 89.1  | -613.580459  | 75.5   | -9.1  |
| <b>13c-TSCO_I</b>                     | -1353.330949 | -1353.099774 | -1353.091309 | -1353.090691 | 111.7 | -1353.123947 | -186.7 | -16.2 |
| <b>13c-TSCO_II</b>                    | -1353.331207 | -1353.100592 | -1353.092023 | -1353.091405 | 112.9 | -1353.124887 | -187.8 | -16.4 |
| <b>13c-TSOMe_I</b>                    | -1353.330269 | -1353.098308 | -1353.089926 | -1353.089308 | 110.3 | -1353.122616 | -273.8 | -15.5 |
| <b>13c-TSOMe_II</b>                   | -1353.328361 | -1353.096169 | -1353.087758 | -1353.087140 | 110.6 | -1353.120501 | -278.7 | -15.4 |
| <b>13c·EtMgCl_I</b>                   | -1353.350566 | -1353.124676 | -1353.115431 | -1353.114813 | 118.9 | -1353.149365 | 27.8   | -19.5 |
| <b>13c·EtMgCl_II</b>                  | -1353.350875 | -1353.124387 | -1353.115200 | -1353.114582 | 118.1 | -1353.149116 | 27.4   | -19.2 |
| <b>13c·EtMgCl_III</b>                 | -1353.350199 | -1353.124527 | -1353.115240 | -1353.114622 | 119.6 | -1353.149343 | 24.4   | -19.6 |
|                                       |              |              |              |              |       |              |        |       |
| <b>1a·CH<sub>3</sub>MgCl(DME)_I</b>   | -1583.635798 | -1583.316029 | -1583.302988 | -1583.302370 | 145.0 | -1583.343778 | 24.5   | -15.0 |
| <b>1a·CH<sub>3</sub>MgCl(DME)_II</b>  | -1583.632625 | -1583.314132 | -1583.301113 | -1583.300495 | 144.9 | -1583.341722 | 24.9   | -15.8 |
| <b>1'a·CH<sub>3</sub>MgCl(DME)_I</b>  | -1583.638093 | -1583.320296 | -1583.307006 | -1583.306388 | 150.2 | -1583.348306 | 13.7   | -16.0 |
| <b>1'a·CH<sub>3</sub>MgCl(DME)_II</b> | -1583.637845 | -1583.319847 | -1583.306588 | -1583.305970 | 152.3 | -1583.347780 | 4.5    | -15.8 |
| <b>1a-TSOMe(DME)</b>                  | -1583.589527 | -1583.269486 | -1583.257730 | -1583.257112 | 133.0 | -1583.296380 | -398.0 | -14.8 |
| <b>1a-TSCO(DME)-I</b>                 | -1583.605122 | -1583.285198 | -1583.273180 | -1583.272562 | 137.3 | -1583.312358 | -334.8 | -14.9 |
| <b>1a-TSCO(DME)-II</b>                | -1583.602937 | -1583.285558 | -1583.273426 | -1583.272808 | 139.4 | -1583.312654 | -343.3 | -16.3 |
|                                       |              |              |              |              |       |              |        |       |
| <b>16</b>                             | -500.415689  | -500.246815  | -500.242535  | -500.241917  | 80.7  | -500.266897  | 80.7   | -7.5  |
| <b>16·CH<sub>3</sub>MgCl(DME)</b>     | -1355.758349 | -1355.482285 | -1355.471270 | -1355.470652 | 133.1 | -1355.508292 | 15.8   | -15.2 |
| <b>16-TSOMe(DME)</b>                  | -1355.688449 | -1355.416753 | -1355.406650 | -1355.406032 | 124.1 | -1355.442108 | -480.4 | -17.1 |
|                                       |              |              |              |              |       |              |        |       |
| <b>17</b>                             | -613.772898  | -613.595791  | -613.590430  | -613.589812  | 89.8  | -613.617129  | 45.9   | -8.7  |
| <b>17·CH<sub>3</sub>MgCl(DME)</b>     | -1469.127337 | -1468.841038 | -1468.829132 | -1468.828514 | 141.0 | -1468.867911 | 10.5   | -15.4 |
| <b>17-TSCO(DME)</b>                   | -1469.090257 | -1468.806020 | -1468.795151 | -1468.794533 | 131.5 | -1468.832095 | -347.5 | -16.7 |

<sup>a</sup> 1 Hartree = 627.51 kcal mol<sup>-1</sup>. <sup>b</sup> Thermal corrections at 195.15 K. <sup>c</sup> Calculated trough the SMD method using tetrahydrofuran as solvent.

## Cartesian coordinates of the structures considered in this work

|                                               |             |             |             |                                                |             |             |             |
|-----------------------------------------------|-------------|-------------|-------------|------------------------------------------------|-------------|-------------|-------------|
| Structure Et2O [B3LYP/6-31G(d)]               |             |             |             | C                                              | -3.05611800 | 2.03021500  | 0.14396000  |
| C                                             | 1.17086800  | -0.19527900 | 0.00000000  | H                                              | -3.75195400 | 1.92984400  | -0.70688100 |
| H                                             | 2.02182000  | 0.49126400  | 0.00000000  | H                                              | -3.69676000 | 1.95100000  | 1.03851600  |
| H                                             | 1.23229100  | -0.83971400 | 0.89294700  | Cl                                             | 0.11876000  | -0.00901600 | 1.73902600  |
| H                                             | 1.23229100  | -0.83971400 | -0.89294700 | C                                              | 3.05611700  | -2.03021600 | -0.14396000 |
| C                                             | -1.17087300 | -0.19535800 | 0.00000000  | H                                              | 3.69675700  | -1.95100500 | -1.03851700 |
| H                                             | -2.02183600 | 0.49120500  | 0.00000000  | H                                              | 3.75195500  | -1.92984300 | 0.70688000  |
| H                                             | -1.23226900 | -0.83961100 | -0.89302200 | O                                              | 2.68845200  | 1.41988900  | -0.19445600 |
| H                                             | -1.23226900 | -0.83961100 | 0.89302200  | O                                              | -2.68845100 | -1.41988900 | 0.19445400  |
| O                                             | 0.00000000  | 0.59000000  | 0.00000000  | C                                              | 2.06586800  | 2.69694600  | -0.39856500 |
| Structure (MeMgCl)2 [B3LYP/6-31G(d)]          |             |             |             | H                                              | 1.13041800  | 2.51578100  | -0.92777300 |
| Cl                                            | -1.72060400 | 0.00000000  | -0.00147100 | H                                              | 1.86762300  | 3.18157200  | 0.56435800  |
| Mg                                            | 0.00000000  | 1.69693000  | -0.00135800 | H                                              | 2.71969100  | 3.33036800  | -1.00921200 |
| Mg                                            | 0.00000000  | -1.69693000 | -0.00135800 | C                                              | -3.97759000 | -1.51674900 | -0.42619100 |
| C                                             | 0.00000000  | 3.77670400  | 0.00329000  | H                                              | -4.64785800 | -2.11310000 | 0.20368100  |
| H                                             | 0.00000000  | 4.17633800  | 1.02582000  | H                                              | -4.36366500 | -0.50100100 | -0.51983700 |
| H                                             | 0.88472100  | 4.18403400  | -0.50213000 | H                                              | -3.88942500 | -1.97879900 | -1.41693700 |
| H                                             | -0.88472100 | 4.18403400  | -0.50213000 | C                                              | -2.06586700 | -2.69694600 | 0.39856200  |
| Cl                                            | 1.72060400  | 0.00000000  | -0.00147100 | H                                              | 1.86762300  | -1.86762300 | -0.56436100 |
| C                                             | 0.00000000  | -3.77670400 | 0.00329000  | H                                              | -1.13041600 | -2.51578200 | 0.92776900  |
| H                                             | -0.88472100 | -4.18403400 | -0.50213000 | H                                              | -2.71968800 | -3.33036900 | 1.00921000  |
| H                                             | 0.88472100  | -4.18403400 | -0.50213000 | C                                              | 3.97759000  | 1.51674900  | 0.42619200  |
| H                                             | 0.00000000  | -4.17633800 | 1.02582000  | H                                              | 3.88942300  | 1.97879900  | 1.41693800  |
| Structure (MeMgCl)2 (DME)2 [B3LYP/6-31G(d)]   |             |             |             | H                                              | 4.36366500  | 0.50100100  | 0.51983900  |
| Cl                                            | 0.13198000  | 0.09381500  | 1.73567200  | H                                              | 4.64785900  | 2.11310000  | -0.20367900 |
| C                                             | 2.37141700  | 2.77784100  | -0.26923800 | Mg                                             | 1.67427100  | -0.42423200 | -0.13493900 |
| H                                             | 1.64175900  | 3.56704000  | -0.50264500 | Mg                                             | -1.67427000 | 0.42423300  | 0.13493800  |
| H                                             | 2.85053900  | 3.08151200  | 0.67382600  | C                                              | -2.45020500 | 3.44860700  | 0.10265400  |
| H                                             | 3.14441100  | 2.84438400  | -1.05021700 | H                                              | -3.20869400 | 4.24819200  | 0.11085200  |
| Cl                                            | -0.13197400 | -0.09380900 | -1.73568500 | H                                              | -1.79215000 | 3.63517400  | 0.96287200  |
| C                                             | -2.37140900 | -2.77783100 | 0.26925700  | H                                              | -1.84326900 | 3.60572200  | -0.80031400 |
| H                                             | -3.14440000 | -2.84435500 | 1.05024100  | C                                              | 2.45020200  | -3.44860700 | -0.10264800 |
| H                                             | -2.85053800 | -3.08151800 | -0.67379900 | H                                              | 3.20869000  | -4.24819300 | -0.11084600 |
| H                                             | -1.64175600 | -3.56703100 | 0.50267500  | H                                              | 1.84326700  | -3.60571900 | 0.80032100  |
| O                                             | -2.97001400 | 0.61654100  | 0.19609500  | H                                              | 1.79214500  | -3.63517500 | -0.96286500 |
| O                                             | 2.97001200  | -0.61654600 | -0.19610100 | Structure (EtMgCl)2 (DME)2_II [B3LYP/6-31G(d)] |             |             |             |
| C                                             | -2.72658700 | 2.02218000  | 0.34705300  | Cl                                             | -0.07530300 | 0.29235600  | -1.71642900 |
| H                                             | -1.79183400 | 2.12622300  | 0.89824100  | C                                              | 3.07188800  | -1.94288100 | -0.53489000 |
| H                                             | -2.64224800 | 2.50165100  | -0.63510600 | H                                              | 2.51689600  | -2.88386300 | -0.68271700 |
| H                                             | -3.54491400 | 2.47750900  | 0.91691900  | H                                              | 3.55691600  | -1.76427100 | -1.51005300 |
| C                                             | 4.21973000  | -0.32735800 | 0.44497700  | Cl                                             | 0.07530400  | -0.29235900 | 1.71643000  |
| H                                             | 5.04394700  | -0.74128700 | -0.14748000 | C                                              | -3.07188300 | 1.94288100  | 0.53489400  |
| H                                             | 4.30691800  | 0.75881800  | 0.49409200  | H                                              | -3.55691100 | 1.76427000  | 1.51005700  |
| H                                             | 4.23713600  | -0.75352300 | 1.45542000  | H                                              | -2.51688900 | 2.88386200  | 0.68272300  |
| C                                             | 2.72657300  | -2.02218400 | -0.34706300 | O                                              | -2.68848900 | -1.43171000 | -0.15044100 |
| H                                             | 2.64220000  | -2.50165100 | 0.63509500  | O                                              | 2.68848700  | 1.43171100  | 0.15044000  |
| H                                             | 1.79183400  | -2.12621600 | -0.89827700 | C                                              | -2.11760100 | -2.63238000 | -0.68917300 |
| H                                             | 3.54491100  | -2.47752300 | -0.91690400 | H                                              | -1.25742900 | -2.33505800 | -1.28903300 |
| C                                             | -4.21974900 | 0.32733700  | -0.44494400 | H                                              | -1.80203300 | -3.30008200 | 0.12097500  |
| H                                             | -4.23718900 | 0.75349800  | -1.45538800 | H                                              | -2.85503400 | -3.13712400 | -1.32413000 |
| H                                             | -4.30692600 | -0.75884000 | -0.49405300 | C                                              | 3.88498500  | 1.66596400  | -0.60478200 |
| H                                             | -5.04395200 | 0.74125900  | 0.14753700  | H                                              | 4.64128300  | 2.13494200  | 0.03521100  |
| Mg                                            | -1.48260300 | -0.87490800 | 0.17726600  | H                                              | 4.24055300  | 0.69297800  | -0.94614100 |
| Mg                                            | 1.48261600  | 0.87491500  | -0.17727700 | H                                              | 3.67193600  | 2.31295800  | -1.46432000 |
| Structure (EtMgCl)2 [B3LYP/6-31G(d)]          |             |             |             | C                                              | 2.11759500  | 2.63238100  | 0.68916800  |
| Cl                                            | 0.32968500  | -1.69173400 | 0.00003000  | H                                              | 1.80202000  | 3.30007700  | -0.12098300 |
| Mg                                            | -1.66678300 | -0.32565300 | -0.00133300 | H                                              | 1.25742700  | 2.33505800  | 1.28903200  |
| Mg                                            | 1.66677400  | 0.32557500  | -0.00004700 | H                                              | 2.85502700  | 3.13713200  | 1.32411900  |
| C                                             | -3.72438800 | -0.74030800 | -0.00204300 | C                                              | -3.88499100 | -1.66596100 | 0.60477600  |
| H                                             | -3.94149100 | -1.37089700 | -0.87744200 | H                                              | -3.67194800 | -2.31296000 | 1.46431100  |
| H                                             | -3.94046500 | -1.37921400 | 0.86754500  | H                                              | -4.24055500 | -0.69297400 | 0.94613900  |
| Cl                                            | -0.32967400 | 1.69167900  | -0.00144700 | H                                              | -4.64128900 | -2.13493200 | -0.03522200 |
| C                                             | 3.72434700  | 0.74038400  | 0.00095200  | Mg                                             | -1.68091000 | 0.39811300  | 0.12416900  |
| H                                             | 3.94127300  | 1.37523900  | -0.87139700 | Mg                                             | 1.68091200  | -0.39811500 | -0.12416800 |
| H                                             | 3.94048900  | 1.37508400  | 0.87360800  | C                                              | 4.16399500  | -2.18581900 | 0.52774700  |
| C                                             | 4.67118900  | -0.47540000 | 0.00125200  | H                                              | 4.85245500  | -3.00652800 | 0.26870700  |
| H                                             | 4.52211700  | -1.11266300 | -0.87982800 | H                                              | 4.79130800  | -1.29646800 | 0.68869200  |
| H                                             | 5.73082400  | -0.17856900 | 0.00185400  | H                                              | 3.73032300  | -2.43763000 | 1.50509900  |
| H                                             | 4.52120500  | -1.11298400 | 0.88194300  | C                                              | -4.16399000 | 2.18582300  | -0.52774200 |
| C                                             | -4.67115600 | 0.47553000  | 0.00425400  | H                                              | -4.85244800 | 3.00653400  | -0.26870000 |
| H                                             | -5.73080400 | 0.17875500  | 0.00320600  | H                                              | -3.73031700 | 2.43763600  | -1.50509300 |
| H                                             | -4.52126300 | 1.10860900  | 0.88820800  | H                                              | -4.79130500 | 1.29647400  | -0.68868800 |
| H                                             | -4.52192200 | 1.11726200  | -0.87354500 | Structure 1a_I [B3LYP/6-31G(d)]                |             |             |             |
| Structure (EtMgCl)2 (DME)2_I [B3LYP/6-31G(d)] |             |             |             | C                                              | -0.95170700 | -0.35979100 | 0.04821400  |
| Cl                                            | -0.11875900 | 0.00901700  | -1.73902700 | C                                              | -0.58073100 | -1.71847400 | 0.27203200  |
|                                               |             |             |             | C                                              | 0.73326800  | -2.10399400 | 0.32598000  |
|                                               |             |             |             | C                                              | 1.77392700  | -1.15792400 | 0.12555000  |

|                                            |             |             |             |                                            |             |             |             |
|--------------------------------------------|-------------|-------------|-------------|--------------------------------------------|-------------|-------------|-------------|
| C                                          | 1.42785700  | 0.20839100  | -0.12091900 | H                                          | 5.89074500  | -0.67518100 | -0.04327200 |
| C                                          | -2.39526300 | 0.00535600  | -0.00942000 | C                                          | 4.30469500  | 0.75441400  | 0.06922100  |
| O                                          | -2.87011500 | 1.11530300  | 0.13228800  | H                                          | 4.96293100  | 1.59451200  | 0.27458200  |
| O                                          | -0.22507300 | 1.90414700  | -0.41626300 | H                                          | 1.93252500  | -2.26002200 | -0.60623300 |
| C                                          | -0.43086300 | 2.75745900  | 0.71827100  | O                                          | -1.69586700 | 2.88319300  | -0.28814100 |
| H                                          | -1.37023600 | -2.44791400 | 0.40707800  | C                                          | -3.10723100 | 3.18994400  | -0.22733900 |
| H                                          | 0.99284300  | -3.14282500 | 0.51266300  | H                                          | -3.16849300 | 4.26676100  | -0.37947900 |
| H                                          | -0.58108500 | 3.75963100  | 0.31155400  | H                                          | -3.64278100 | 2.65300400  | -1.01283400 |
| H                                          | 0.45226600  | 2.75436400  | 1.37022000  | H                                          | -3.51163000 | 2.90913300  | 0.74745600  |
| H                                          | -1.32045900 | 2.45196000  | 1.27302600  |                                            |             |             |             |
| C                                          | 0.04955400  | 0.59335700  | -0.13547000 |                                            |             |             |             |
| C                                          | 2.46292900  | 1.15300500  | -0.35481700 | Structure 1a ·CH3MgCl (b) [B3LYP/6-31G(d)] |             |             |             |
| C                                          | 3.78415700  | 0.76597500  | -0.32423100 | C                                          | 1.61033900  | 1.35759700  | -0.23316800 |
| H                                          | 4.56798500  | 1.49610000  | -0.50621300 | C                                          | 2.77029000  | 2.12880800  | 0.07074000  |
| C                                          | 4.12934500  | -0.58186100 | -0.06330700 | C                                          | 3.98314500  | 1.52342000  | 0.26683000  |
| H                                          | 5.17569500  | -0.87453100 | -0.04126500 | C                                          | 4.11586500  | 0.10995700  | 0.18518800  |
| C                                          | 3.14590500  | -1.52138100 | 0.15283300  | C                                          | 2.96342000  | -0.68412300 | -0.12058600 |
| H                                          | 3.40650500  | -2.55968100 | 0.34322400  | C                                          | 0.30298900  | 2.02328100  | -0.39141200 |
| H                                          | 2.18855300  | 2.17882700  | -0.57325200 | O                                          | -0.79913600 | 1.46936100  | -0.29998400 |
| O                                          | -3.17013600 | -1.08567400 | -0.24359600 | C                                          | 0.62720100  | -0.79844900 | -0.68706600 |
| C                                          | -4.58090600 | -0.83092000 | -0.29327800 | O                                          | 0.50443000  | -1.04587200 | -2.10813500 |
| H                                          | -5.04583100 | -1.80112700 | -0.47216500 | H                                          | 2.67025300  | 3.20454600  | 0.15221700  |
| H                                          | -4.93086900 | -0.40398500 | 0.65067000  | H                                          | 4.85994400  | 2.12061600  | 0.50129000  |
| H                                          | -4.81759700 | -0.13622400 | -1.10359400 | H                                          | -0.34595400 | -1.71576300 | -2.22004100 |
|                                            |             |             |             | H                                          | 1.41848300  | -1.51340400 | -2.48625000 |
|                                            |             |             |             | H                                          | 0.31636800  | -0.10810900 | -2.64191800 |
| Structure 1a_II [B3LYP/6-31G(d)]           |             |             |             | Mg                                         | -1.28863100 | -0.27601500 | 0.76108200  |
| C                                          | 0.87971100  | 0.69988400  | -0.00160500 | C                                          | -0.24650300 | -0.68163200 | 2.54579900  |
| C                                          | 0.27918900  | 1.98122700  | 0.17604100  | H                                          | 0.52382100  | -1.46036700 | 2.44193600  |
| C                                          | -1.07952600 | 2.14097100  | 0.22879000  | H                                          | -0.92407900 | -1.02563100 | 3.34100200  |
| C                                          | -1.94392700 | 1.02306200  | 0.07904000  | C                                          | 1.72242300  | -0.02597100 | -0.34752000 |
| C                                          | -1.36897400 | -0.27270800 | -0.11436000 | C                                          | 3.08448100  | -2.09908300 | -0.17193300 |
| C                                          | 2.37237900  | 0.71330600  | -0.06908200 | C                                          | 4.30227100  | -2.70023000 | 0.05244400  |
| O                                          | 3.02640800  | 1.74051300  | -0.06236900 | H                                          | 4.38556400  | -3.78264900 | 0.02174200  |
| O                                          | 0.54410400  | -1.68214100 | -0.33624800 | H                                          | 5.44730300  | -1.91747300 | 0.33624300  |
| C                                          | 0.85065300  | -2.41784200 | 0.85192300  | C                                          | 6.40161200  | -2.40657700 | 0.51019900  |
| H                                          | 0.94751700  | 2.82987900  | 0.26766600  | C                                          | 5.35466500  | -0.54507100 | 0.40524900  |
| H                                          | -1.51186200 | 3.12758500  | 0.37387000  | H                                          | 6.22988500  | 0.05653200  | 0.63617300  |
| H                                          | 1.18634400  | -3.40240100 | 0.51905500  | H                                          | 2.19907900  | -2.69493400 | -0.36264900 |
| H                                          | -0.03939200 | -2.52854800 | 1.48471500  | O                                          | 0.39366300  | 3.32811900  | -0.63279700 |
| H                                          | 1.65124700  | -1.93294000 | 1.41856900  | C                                          | -0.85256800 | 4.05927500  | -0.71017500 |
| C                                          | 0.05574800  | -0.41636200 | -0.13141900 | H                                          | -0.55993100 | 5.10225000  | -0.82389400 |
| C                                          | -2.22824000 | -1.38952300 | -0.29683900 | H                                          | -1.43091900 | 3.72167200  | -1.57281200 |
| C                                          | -3.59629500 | -1.23372000 | -0.26799000 | H                                          | -1.43613100 | 3.90866500  | 0.19986700  |
| H                                          | -4.24364400 | -2.09443100 | -0.41191100 | Cl                                         | -3.59542000 | 0.80416300  | 1.25785400  |
| C                                          | -4.16656500 | 0.04472900  | -0.05922400 | Cl                                         | -2.57063300 | -1.89228500 | -0.66277700 |
| H                                          | -5.24748100 | 0.15484300  | -0.03802800 | Mg                                         | -4.64882400 | -0.86535300 | -0.02498100 |
| C                                          | -3.35759700 | 1.14697700  | 0.10639000  | C                                          | -6.61056900 | -1.34791100 | -0.55639900 |
| H                                          | -3.79143500 | 2.13270700  | 0.25573300  | H                                          | -7.31879100 | -0.55360100 | -0.28586900 |
| H                                          | -1.78406400 | -2.36175000 | -0.47796200 | H                                          | -6.71471000 | -1.52031400 | -1.63627400 |
| O                                          | 2.94889100  | -0.50600300 | -0.13629600 | H                                          | 0.26507900  | 0.20430200  | 2.95481700  |
| C                                          | 4.38222700  | -0.49263900 | -0.22787000 | H                                          | -6.95294500 | -2.26483400 | -0.05727100 |
| H                                          | 4.67775000  | -1.54094000 | -0.28242500 |                                            |             |             |             |
| H                                          | 4.70514500  | 0.04497700  | -1.12310300 | Structure 1a ·CH3MgCl (c) [B3LYP/6-31G(d)] |             |             |             |
| H                                          | 4.82194300  | -0.01211100 | 0.65035100  | C                                          | 1.10794100  | 0.40960000  | -0.42045500 |
|                                            |             |             |             | C                                          | 0.53210500  | 1.65849400  | -0.19132200 |
| Structure 1a ·CH3MgCl (a) [B3LYP/6-31G(d)] |             |             |             | C                                          | 1.36120200  | 2.71368200  | 0.29463300  |
| C                                          | 0.10471500  | 1.38155400  | -0.12962500 | C                                          | 2.69222200  | 2.51283600  | 0.54560800  |
| C                                          | 0.98718600  | 2.46776600  | 0.14054500  | C                                          | 3.29301900  | 1.24424200  | 0.33091300  |
| C                                          | 2.34282500  | 2.27585300  | 0.19230000  | C                                          | 4.66754600  | 1.00806500  | 0.58813500  |
| C                                          | 2.90692700  | 0.98626100  | -0.00560000 | C                                          | 5.22014100  | -0.23431300 | 0.37088800  |
| C                                          | 2.03986300  | -0.12088500 | -0.27965900 | C                                          | 4.42078200  | -1.29901900 | -0.10990000 |
| C                                          | -1.35881300 | 1.60551400  | -0.12311800 | C                                          | 3.08335600  | -1.10761100 | -0.37341700 |
| O                                          | -2.21596900 | 0.73313400  | 0.03738500  | C                                          | 2.48628600  | 0.16651500  | -0.16200200 |
| O                                          | -0.18637700 | -0.95024000 | -0.68216100 | C                                          | -0.90811000 | 1.92492000  | -0.40757000 |
| Cl                                         | -3.22696000 | -2.56448700 | -0.73323200 | O                                          | -1.77917800 | 1.07136400  | -0.59844800 |
| C                                          | -0.32449500 | -1.19189400 | -2.11314800 | O                                          | 0.36430900  | -0.65439400 | -0.91908400 |
| H                                          | 0.56146800  | 3.44909200  | 0.31193700  | Cl                                         | -2.62861200 | -2.21719900 | -0.95587700 |
| H                                          | 3.00442600  | 3.11193300  | 0.40120300  | C                                          | 0.25486100  | -0.68358300 | -2.36643300 |
| H                                          | -1.03812700 | -2.00983000 | -2.20277000 | O                                          | -1.20444000 | 3.22215800  | -0.38443600 |
| H                                          | 0.64984700  | -1.45496400 | -2.53269400 | C                                          | -2.59801900 | 3.58035800  | -0.54410200 |
| H                                          | -0.71839900 | -0.29533400 | -2.60070100 | H                                          | 0.91050400  | 3.68165200  | 0.47318700  |
| Mg                                         | -1.92888300 | -1.26843700 | 0.65200500  | H                                          | 3.30450500  | 3.32795200  | 0.92118200  |
| C                                          | -1.27112900 | -1.33316100 | 2.65443600  | H                                          | 5.27611200  | 1.82646800  | 0.96350700  |
| H                                          | -0.75438200 | -2.27506300 | 2.89131800  | H                                          | 6.27367900  | -0.40356900 | 0.57453600  |
| H                                          | -0.57535200 | -0.52554100 | 2.93043700  | H                                          | 4.86440100  | -2.27801800 | -0.26446100 |
| H                                          | -2.11007600 | -1.26640400 | 3.36338100  | H                                          | 2.47074800  | -1.93385600 | -0.71477600 |
| C                                          | 0.64000600  | 0.11772200  | -0.36133700 | H                                          | -0.31421000 | -1.57916800 | -2.61237900 |
| C                                          | 2.59639300  | -1.41874700 | -0.44168300 | H                                          | 1.25500200  | -0.72377600 | -2.80692300 |
| C                                          | 3.95715100  | -1.60639500 | -0.35544100 | H                                          | -0.28837100 | 0.19818800  | -2.71275500 |
| H                                          | 4.37393900  | -2.60267500 | -0.47000700 | H                                          | -2.61978100 | 4.66522000  | -0.45030300 |
| C                                          | 4.81880200  | -0.51084900 | -0.10621500 | H                                          | -3.20581700 | 3.10602300  | 0.22855100  |

|                                           |             |             |             |                                           |             |             |             |
|-------------------------------------------|-------------|-------------|-------------|-------------------------------------------|-------------|-------------|-------------|
| H                                         | -2.95118200 | 3.26847300  | -1.52943000 | H                                         | -0.51838600 | -1.98606600 | 3.80381700  |
| Mg                                        | -3.07026600 | -0.23585100 | 0.41267400  | C                                         | 1.43499100  | -0.00663900 | -0.08142700 |
| Mg                                        | -0.51633000 | -2.31999800 | 0.27049400  | C                                         | 3.45214000  | -1.38303500 | -0.56961300 |
| C                                         | -4.90880100 | 0.66235600  | 0.88372900  | C                                         | 4.82100500  | -1.47844100 | -0.67578000 |
| H                                         | -5.60899500 | -0.04514900 | 1.34979700  | H                                         | 5.27714600  | -2.42524900 | -0.94908300 |
| H                                         | -4.80887100 | 1.49823000  | 1.59356000  | C                                         | 5.64160700  | -0.35313400 | -0.42137200 |
| H                                         | -5.42209900 | 1.06187400  | -0.00424600 | H                                         | 6.72002200  | -0.44396500 | -0.51354000 |
| Cl                                        | -1.32645300 | -0.88772800 | 2.04327300  | C                                         | 5.08085200  | 0.84747000  | -0.04709800 |
| C                                         | 0.79085100  | -3.96170000 | 0.31562000  | H                                         | 5.70883900  | 1.70923800  | 0.16218500  |
| H                                         | 1.23462000  | -4.20717900 | -0.66159600 | H                                         | 2.82603300  | -2.25106900 | -0.74154100 |
| H                                         | 1.62632600  | -3.82324300 | 1.01695800  | O                                         | -0.99651200 | 2.57915300  | 0.55626900  |
| H                                         | 0.26085500  | -4.86822900 | 0.64165200  | C                                         | -2.40004200 | 2.89397500  | 0.76757800  |
| Structure 1a·CH3MgCl (d) [B3LYP/6-31G(d)] |             |             |             | H                                         | -2.40655700 | 3.94246000  | 1.06248000  |
| C                                         | -2.69438600 | -0.10446700 | 0.37322300  | H                                         | -2.92670900 | 2.75008600  | -0.17730900 |
| C                                         | -2.63977000 | -0.53680800 | -0.94980700 | H                                         | -2.82162100 | 2.25890800  | 1.54713000  |
| C                                         | -3.34926200 | -1.71494800 | -1.32702400 | Structure 1a·CH3MgCl (f) [B3LYP/6-31G(d)] |             |             |             |
| C                                         | -4.06740200 | -2.42733600 | -0.40381900 | C                                         | 1.05739500  | 1.42512300  | -0.42676200 |
| C                                         | -4.10815900 | -2.02447600 | 0.95943700  | C                                         | 1.93357500  | 1.89424300  | -1.44897200 |
| C                                         | -3.39889200 | -0.84689400 | 1.36212300  | C                                         | 3.14604200  | 1.29357700  | -1.26185800 |
| O                                         | -2.05593200 | 1.05925700  | 0.75901100  | C                                         | 3.55661200  | 0.17901400  | -0.87951100 |
| C                                         | -2.91318000 | 2.22814500  | 0.77865900  | C                                         | 2.69307100  | -0.30635600 | 0.15579200  |
| H                                         | -3.30363700 | -2.03803600 | -2.36006100 | C                                         | -0.26432900 | 2.05445100  | -0.24120600 |
| H                                         | -4.60421300 | -3.32332100 | -0.70293100 | O                                         | -1.23428800 | 1.52623800  | 0.31404900  |
| H                                         | -2.28044800 | 3.04947500  | 1.10945700  | O                                         | 0.64067200  | -0.08573000 | 1.40061800  |
| H                                         | -3.74481900 | 2.06849300  | 1.47078700  | Cl                                        | -3.88887200 | -0.05061200 | -0.48482000 |
| H                                         | -3.29737400 | 2.42949400  | -0.22696200 | C                                         | 0.96975200  | 0.46848800  | 2.70374200  |
| Mg                                        | 2.72492300  | -0.87842300 | -0.00281300 | H                                         | 1.61690000  | 2.73196700  | -2.05895500 |
| Mg                                        | 0.16055800  | 1.50822800  | -0.00140500 | H                                         | 3.80518000  | 1.65689800  | -2.44532300 |
| Cl                                        | 0.69338500  | -0.61134800 | 1.23491000  | H                                         | 0.24644600  | 0.03529600  | 3.39273200  |
| C                                         | 0.28673600  | 3.47720400  | 0.74959000  | H                                         | 0.86267200  | 1.55789300  | 2.68150000  |
| H                                         | -0.27228100 | 4.21914300  | 0.15669900  | H                                         | 1.99493400  | 0.19869800  | 2.97335700  |
| H                                         | -0.05089000 | 3.59398500  | 1.79155000  | Mg                                        | -2.72920200 | -1.77514500 | -1.61866500 |
| H                                         | 1.33213500  | 3.81872300  | 0.73577200  | Mg                                        | -1.80107300 | -0.37847000 | 0.88244900  |
| Cl                                        | 2.28625200  | 0.96531500  | -1.40706700 | C                                         | -1.02334800 | -2.19774900 | -0.26286800 |
| C                                         | -1.83678200 | 0.19156700  | -1.95097700 | H                                         | -0.47895000 | -2.22626700 | 0.69222100  |
| O                                         | -0.94356400 | 1.00834900  | -1.70040800 | H                                         | -1.41978500 | -3.22814600 | -0.31977600 |
| C                                         | 4.23243100  | -2.31948500 | 0.13085800  | H                                         | -0.22935400 | -2.14722600 | -1.02448400 |
| H                                         | 3.85006500  | -3.33333700 | -0.05146300 | C                                         | 1.45200300  | 0.35711700  | 0.37699100  |
| H                                         | 5.03732200  | -2.14413800 | -0.59516100 | Cl                                        | -2.28689600 | -0.66697500 | 3.09493000  |
| H                                         | 4.69550700  | -2.33371000 | 1.12698800  | C                                         | -3.01792200 | -2.69639800 | -3.47727600 |
| O                                         | -2.14022100 | -0.12079900 | -3.20798000 | H                                         | -2.67971300 | -3.74193500 | -3.48817300 |
| C                                         | -1.33046600 | 0.49210400  | -4.23899600 | H                                         | -4.07786900 | -2.70049200 | -3.76666100 |
| H                                         | -0.27473000 | 0.27152500  | -4.07026800 | H                                         | -2.47611300 | -2.18478700 | -4.26286800 |
| H                                         | -1.68229500 | 0.05186100  | -5.17109000 | O                                         | -0.35501100 | 3.27519700  | -0.75533700 |
| H                                         | -1.48105800 | 1.57373100  | -4.23893800 | C                                         | -1.65177200 | 3.91732900  | -0.67422600 |
| C                                         | -3.40019500 | -0.46581700 | 2.73108400  | H                                         | -1.53325600 | 4.85610200  | -1.21335200 |
| C                                         | -4.09743400 | -1.20751100 | 3.65762100  | H                                         | -2.41360500 | 3.28695500  | -1.13639500 |
| H                                         | -4.08491300 | -0.91666100 | 4.70390700  | H                                         | -1.91209800 | 4.09770800  | 0.37068600  |
| C                                         | -4.82030400 | -2.35758900 | 3.25894200  | C                                         | 3.08589700  | -1.44153300 | 0.91547900  |
| H                                         | -5.36707600 | -2.93161400 | 4.00169800  | C                                         | 4.29235100  | -2.05770600 | 0.67130100  |
| C                                         | -4.82059700 | -2.75928400 | 1.94158800  | H                                         | 4.58143700  | -2.93002600 | 1.25002000  |
| H                                         | -5.36122000 | -3.65133400 | 1.63626000  | C                                         | 5.15667600  | -1.56845000 | -0.33753600 |
| H                                         | -2.81931100 | 0.39703600  | 3.03699600  | H                                         | 6.10652200  | -2.06411200 | -0.51682200 |
| Structure 1a·CH3MgCl (e) [B3LYP/6-31G(d)] |             |             |             | H                                         | 4.79474000  | -0.47839000 | -1.09748900 |
| C                                         | 0.85946200  | 1.18479000  | 0.35433200  | C                                         | 5.45125600  | -0.10913800 | -1.88094100 |
| C                                         | 1.70845200  | 2.29790000  | 0.63013400  | H                                         | 2.41131100  | -1.82925200 | 1.67062200  |
| C                                         | 3.06685300  | 2.20011500  | 0.48904600  | Structure 1a·CH3MgCl (g) [B3LYP/6-31G(d)] |             |             |             |
| C                                         | 3.67456400  | 0.98215600  | 0.08045700  | C                                         | 0.94682300  | -0.56528000 | 0.41327000  |
| C                                         | 2.84505000  | -0.15152100 | -0.20071200 | C                                         | 0.28224600  | -1.77383900 | 0.21999200  |
| C                                         | -0.60009400 | 1.32977300  | 0.55006900  | C                                         | 1.02389700  | -2.89269200 | -0.26313600 |
| O                                         | -1.38476300 | 0.37288200  | 0.74259000  | C                                         | 2.35918700  | -2.78501700 | -0.54762800 |
| O                                         | 0.64318900  | -1.10368500 | -0.40532800 | C                                         | 3.04675300  | -1.55374400 | -0.37865100 |
| Cl                                        | -2.55050200 | -2.47222700 | -0.16289200 | C                                         | 4.42508400  | -1.41418600 | -0.68032200 |
| C                                         | 0.36784700  | -1.25871700 | -1.84160000 | C                                         | 5.06058100  | -0.20355600 | -0.51577300 |
| H                                         | 1.25395500  | 3.22489600  | 0.95693400  | C                                         | 4.34425600  | 0.92420600  | -0.04796600 |
| H                                         | 3.69928600  | 3.05718400  | 0.70221600  | C                                         | 3.00634000  | 0.82854900  | 0.26238000  |
| H                                         | -0.12036700 | -2.22678300 | -1.94243900 | C                                         | 2.32711300  | -0.41269900 | 0.10876300  |
| H                                         | 1.31551800  | -1.24095700 | -2.38306200 | C                                         | -1.16772000 | -1.92714200 | 0.46705500  |
| H                                         | -0.30373400 | -0.46409000 | -2.17434200 | O                                         | -1.98166400 | -1.00557100 | 0.57298400  |
| Mg                                        | -3.47862600 | -0.17397100 | -0.39256200 | O                                         | 0.28504000  | 0.54249600  | 0.94099700  |
| Mg                                        | -0.75629800 | -1.61024800 | 1.13231400  | C                                         | 0.30641800  | 0.61623700  | 2.38967400  |
| C                                         | -5.07516200 | 0.33585000  | 0.87733900  | O                                         | -1.54662200 | -3.19916000 | 0.56880300  |
| H                                         | -4.80240000 | 0.32680400  | 1.94412900  | C                                         | -2.96156200 | -3.44892200 | 0.74086500  |
| H                                         | -5.49306100 | 1.33195400  | 0.66832300  | H                                         | 0.50409200  | -3.83085800 | -0.41178800 |
| H                                         | -5.91117900 | -0.37157300 | 0.77840700  | H                                         | 2.90757400  | -3.64616600 | -0.91926100 |
| Cl                                        | -2.65336500 | 0.84255200  | -2.30946400 | H                                         | 4.96898300  | -2.27955400 | -1.04964200 |
| C                                         | 0.15256000  | -2.12915300 | 2.94511900  | H                                         | 6.11603800  | -0.10772600 | -0.75457100 |
| H                                         | 0.45256300  | -3.18692500 | 2.96336100  | H                                         | 4.85122600  | 1.87862200  | 0.05737000  |
| H                                         | 1.05965400  | -1.54488100 | 3.15827700  | H                                         | 2.45766200  | 1.70721900  | 0.58593800  |

|    |             |             |             |    |             |             |             |
|----|-------------|-------------|-------------|----|-------------|-------------|-------------|
| H  | -0.12933200 | 1.57879600  | 2.65748200  | H  | -5.76965900 | 1.47199200  | 0.33851300  |
| H  | 1.33852800  | 0.56328300  | 2.74454600  | H  | -6.25912300 | -0.20690500 | 0.17332300  |
| H  | -0.29150800 | -0.19753200 | 2.80790100  | C  | 1.35855900  | 0.12129300  | -0.21310100 |
| H  | -3.05390400 | -4.53396400 | 0.76003400  | C  | 3.30494000  | -1.33280700 | -0.76179000 |
| H  | -3.52761600 | -3.02096200 | -0.08873100 | C  | 4.66742400  | -1.48818800 | -0.87534400 |
| H  | -3.30582000 | -3.01343000 | 1.68133900  | H  | 5.07799800  | -2.44517900 | -1.18306800 |
| Mg | -3.06013100 | 0.47342100  | -0.46040500 | C  | 5.54092800  | -0.41359700 | -0.58009200 |
| Mg | -0.72000500 | 2.15323000  | -0.10496900 | H  | 6.61365400  | -0.55203500 | -0.67890600 |
| C  | -2.69127600 | 2.25106000  | 0.91630900  | C  | 5.03876300  | 0.79540900  | -0.15409700 |
| H  | -2.18357300 | 3.04609100  | 1.48905100  | H  | 5.70738900  | 1.61631200  | 0.09049800  |
| H  | -3.54645100 | 2.78156900  | 0.46826100  | H  | 2.63951400  | -2.16588300 | -0.95737900 |
| H  | -3.11133800 | 1.60852000  | 1.70859500  | C  | -2.79166300 | 1.03734700  | -2.60947500 |
| Cl | -1.22809400 | 0.93704000  | -2.09332800 | H  | -2.43306800 | 0.33823500  | -3.38088100 |
| C  | -4.99014900 | -0.20389700 | -0.94375400 | H  | -2.45327800 | 1.74236000  | -3.13638200 |
| H  | -5.56662600 | -0.50790900 | -0.05635400 | H  | -1.91496400 | 1.63800600  | -2.30974300 |
| H  | -5.59544600 | 0.55690100  | -1.45694500 | Cl | 0.00384500  | -2.14573900 | 2.63911000  |
| H  | -4.96975900 | -1.07534900 | -1.61683900 | O  | -0.97423900 | 2.75559700  | 0.62482500  |
| Cl | 0.73026600  | 3.86508100  | 0.25035000  | C  | -2.36416300 | 3.03383500  | 0.94558300  |

Structure 1a·CH3MgCl (h) [B3LYP/6-31G(d)]

|    |             |             |             |
|----|-------------|-------------|-------------|
| C  | 0.95640600  | 1.23234700  | 0.13707000  |
| C  | 1.79960100  | 2.35759200  | 0.37715200  |
| C  | 3.16303700  | 2.23459000  | 0.34069500  |
| C  | 3.77889300  | 0.98155400  | 0.07459800  |
| C  | 2.95406400  | -0.16500400 | -0.16787700 |
| C  | -0.51118500 | 1.39913200  | 0.20727500  |
| O  | -1.31492700 | 0.45589600  | 0.38016600  |
| O  | 0.75723800  | -1.11540000 | -0.42433200 |
| Cl | -2.42745300 | -2.49455400 | -0.21246100 |
| C  | 0.51231300  | -1.34676700 | -1.84796100 |
| H  | 1.33691500  | 3.31244000  | 0.59427300  |
| H  | 3.79261700  | 3.09991100  | 0.52722800  |
| H  | -0.11870000 | -0.55116100 | -2.25069600 |
| H  | -0.01037000 | -2.29980600 | -1.90841400 |
| H  | 1.47046000  | -1.39005900 | -2.37025400 |
| Mg | -3.30846100 | -0.22563000 | -0.78547200 |
| Mg | -0.75012400 | -1.45973300 | 1.10110500  |
| C  | -2.82682500 | 0.49707300  | -2.71578800 |
| H  | -1.95772100 | 1.17602900  | -2.75616400 |
| H  | -2.61145500 | -0.31067800 | -3.43153900 |
| H  | -3.66321500 | 1.06456300  | -3.15053400 |
| Cl | -4.83189400 | 0.41951600  | 0.79633900  |
| C  | 0.11167400  | -1.72809600 | 2.98773400  |
| H  | 0.62554400  | -2.69695200 | 3.06973400  |
| H  | 0.85407200  | -0.95908900 | 3.24580400  |
| H  | -0.64435300 | -1.71111100 | 3.78471700  |
| C  | 1.54271300  | 0.00144800  | -0.15045500 |
| C  | 3.56605700  | -1.42659300 | -0.40268700 |
| C  | 4.93744900  | -1.54089200 | -0.41440600 |
| H  | 5.39775400  | -2.50928300 | -0.58620100 |
| C  | 5.75509500  | -0.40618500 | -0.19364100 |
| H  | 6.83582900  | -0.51333100 | -0.20825400 |
| C  | 5.18836800  | 0.82497700  | 0.04971800  |
| H  | 5.81370400  | 1.69483100  | 0.23150300  |
| H  | 2.93999100  | -2.29948600 | -0.54883000 |
| O  | -0.90127900 | 2.64627000  | 0.09585700  |
| C  | -2.31916200 | 2.97064200  | 0.21002100  |
| H  | -2.33950000 | 4.03631500  | 0.43337900  |
| H  | -2.79873400 | 2.76643500  | -0.74848400 |
| H  | -2.79017200 | 2.38139600  | 0.99697400  |

Structure 1a·CH3MgCl (i) [B3LYP/6-31G(d)]

|    |             |             |             |
|----|-------------|-------------|-------------|
| C  | 0.84253500  | 1.31324800  | 0.28964200  |
| C  | 1.74250400  | 2.37066000  | 0.61289200  |
| C  | 3.09401700  | 2.21640700  | 0.45266500  |
| C  | 3.64063900  | 0.99093500  | -0.01456700 |
| C  | 2.75760900  | -0.08922700 | -0.34264700 |
| C  | -0.60354600 | 1.49490000  | 0.53785700  |
| O  | -1.41851000 | 0.56695400  | 0.69530100  |
| O  | 0.50495600  | -0.90842000 | -0.61232100 |
| Cl | -2.73621900 | -2.24162500 | -0.55103200 |
| C  | 0.27088400  | -0.97079300 | -2.05855100 |
| H  | 1.33361400  | 3.29812200  | 0.99461400  |
| H  | 3.76815800  | 3.03102800  | 0.70137700  |
| H  | -0.33627500 | -1.85975200 | -2.22188000 |
| H  | 1.23194600  | -1.05285800 | -2.56892200 |
| H  | -0.27412900 | -0.08161500 | -2.38027200 |
| Mg | -3.81577500 | 0.07943400  | -0.99837200 |
| Mg | -1.00701300 | -1.42897900 | 0.77283200  |
| C  | -5.39002100 | 0.43886600  | 0.37018000  |
| H  | -5.10672100 | 0.24281100  | 1.41570300  |

Structure 1a·CH3MgCl (j) [B3LYP/6-31G(d)]

|    |             |             |             |
|----|-------------|-------------|-------------|
| C  | 1.17615500  | -0.39098100 | 0.45783400  |
| C  | 0.51129300  | -1.59948700 | 0.25674600  |
| C  | 1.24281700  | -2.73054500 | -0.27370000 |
| C  | 2.56863800  | -2.58583500 | -0.59542500 |
| C  | 3.25731900  | -1.35657500 | -0.41691700 |
| C  | 4.62641300  | -1.20406500 | -0.75371600 |
| C  | 5.26434100  | 0.00296100  | -0.57394600 |
| C  | 4.56001100  | 1.11487100  | -0.05251800 |
| C  | 3.23133100  | 1.00478900  | 0.29000100  |
| C  | 2.54833300  | -0.23178300 | 0.11905600  |
| O  | -0.93179500 | -1.76346200 | 0.53481300  |
| C  | -1.72314100 | -0.83833300 | 0.75741200  |
| O  | 0.53594900  | 0.71498800  | 1.00960500  |
| Cl | -4.74150900 | -0.24091900 | -0.77070700 |
| C  | 0.52816000  | 0.73459300  | -2.45768400 |
| O  | -1.33219000 | -3.02612500 | 0.52968700  |
| C  | -2.75035600 | -3.27165000 | 0.73309500  |
| H  | 0.72090000  | -3.63938700 | -0.42909600 |
| H  | 3.10775100  | -3.43632900 | -1.00318700 |
| H  | 5.16180300  | -2.05749500 | -1.16114800 |
| H  | 6.31247700  | 0.10822100  | -0.83920800 |
| H  | 5.07079600  | 2.06520700  | 0.07071800  |
| H  | 2.68899500  | 1.86547700  | 0.66500600  |
| H  | 0.17628100  | 1.72385500  | 2.75140300  |
| H  | 1.54224800  | 0.57387500  | 2.83363200  |
| H  | -0.15321900 | -0.03075100 | 2.83705500  |
| H  | -2.87220200 | -4.34014700 | 0.56215200  |
| H  | -3.34730900 | -2.68189300 | 0.03477000  |
| H  | -3.02080000 | -3.00986000 | 1.75846900  |
| Mg | -2.71378400 | 0.64462300  | -0.26711200 |
| Mg | -0.43822800 | 2.43406700  | -0.06104400 |
| C  | -2.46005300 | 2.47067400  | 0.98220700  |
| H  | -1.92106600 | 2.64881100  | 1.92688300  |
| H  | -2.68925700 | 3.46838200  | 0.57557900  |
| H  | -3.44446600 | 2.11652200  | 1.33850800  |
| Cl | -1.02919400 | 1.05628500  | -1.97806100 |
| C  | 0.86043800  | 4.07616000  | 0.14245100  |
| H  | 1.34234900  | 4.14751600  | 1.13039300  |
| H  | 1.67236200  | 4.05721200  | -0.59959100 |
| H  | 0.33523900  | 5.03105800  | -0.00501000 |

Structure 1a·CH3MgCl (k) [B3LYP/6-31G(d)]

|    |             |             |             |
|----|-------------|-------------|-------------|
| C  | -1.00236400 | 0.54798000  | 0.34769200  |
| C  | -0.41437800 | 1.79647900  | 0.16132100  |
| C  | -1.22773800 | 2.87965800  | -0.28485200 |
| C  | -2.56013300 | 2.69906200  | -0.54751500 |
| C  | -3.17226300 | 1.42768900  | -0.38587200 |
| C  | -4.54714300 | 1.21510800  | -0.66125000 |
| C  | -5.11068600 | -0.03117300 | -0.50192900 |
| C  | -4.32221400 | -1.12338200 | -0.06705000 |
| C  | -2.98530400 | -0.95730400 | 0.21701300  |
| C  | -2.37920400 | 0.32182500  | 0.06989400  |
| C  | 1.02924900  | 2.03688400  | 0.39256100  |
| O  | 1.91995000  | 1.18842300  | 0.33332400  |
| O  | -0.25849100 | -0.51680600 | 0.85122800  |
| Cl | -0.63887900 | -3.83512900 | -0.05932300 |
| C  | -0.28911400 | -0.63896300 | 2.30064700  |
| O  | 1.30301700  | 3.31029300  | 0.66821300  |



|    |             |             |             |    |             |             |             |
|----|-------------|-------------|-------------|----|-------------|-------------|-------------|
| C  | 2.70006800  | 3.65425900  | 0.82954800  | Cl | -4.73096500 | -0.21125500 | -1.09615500 |
| H  | -0.76623000 | 3.85004800  | -0.42142200 | Cl | 0.86323200  | 3.89449600  | 0.07825400  |
| H  | -3.16487600 | 3.53329100  | -0.89223900 | C  | 0.43901400  | 0.62061900  | 2.38006800  |
| H  | -5.14634000 | 2.05421700  | -1.00469900 | O  | -1.42632300 | -3.15467300 | 0.42998500  |
| H  | -6.16430400 | -0.18244300 | -0.71905300 | C  | -2.85300800 | -3.39150500 | 0.57350100  |
| H  | -4.77201000 | -2.10646000 | 0.03416100  | H  | 0.64695200  | -3.77749800 | -0.49850400 |
| H  | -2.38208200 | -1.81005400 | 0.51156200  | H  | 3.05348700  | -3.59008800 | -0.99261800 |
| H  | 0.37904600  | -1.46168300 | 2.55246300  | H  | 5.11862800  | -2.22431900 | -1.09279600 |
| H  | -1.30906600 | -0.85161100 | 2.62956600  | H  | 6.26705600  | -0.05904800 | -0.75868400 |
| H  | 0.07751000  | 0.28737100  | 2.75022600  | H  | 5.00202500  | 1.91594600  | 0.07945000  |
| H  | 2.70622000  | 4.73025000  | 0.99787200  | H  | 2.60474800  | 1.73840700  | 0.05921800  |
| H  | 3.26107000  | 3.39319400  | -0.07000000 | H  | -0.00204500 | 1.57666300  | 2.66142000  |
| H  | 3.11770400  | 3.12394300  | 1.68788100  | H  | 1.46598000  | 0.55806500  | 2.74853300  |
| Mg | 2.96683300  | -0.23925300 | -0.78959900 | H  | -0.16660900 | -0.20028400 | 2.77192500  |
| Mg | 0.76527400  | -2.06493700 | -0.27534500 | H  | -2.97792100 | -4.45587100 | 0.38022100  |
| Cl | 2.83634000  | -1.98235100 | 0.94825900  | H  | -3.41732900 | -2.78441500 | -0.13697700 |
| C  | 4.65633500  | 0.62387800  | -1.69381800 | H  | -3.16063000 | -2.14518400 | -1.59232400 |
| H  | 4.41426300  | 1.51148100  | -2.29929000 | Mg | -2.73865800 | 0.62967800  | -0.40113400 |
| H  | 5.39782700  | 0.94801500  | -0.94760200 | Mg | -0.61897000 | 2.18429700  | -0.12044600 |
| H  | 5.18372600  | -0.06694900 | -2.36702800 | C  | -2.72458600 | 2.02726500  | 1.10661100  |
| C  | 1.26413800  | -1.01984700 | -2.14717900 | C  | -1.15312600 | 1.12078000  | -1.99335900 |
| H  | 0.31060900  | -1.45119400 | -2.50151000 | H  | -1.99302700 | 3.14691300  | 1.52045400  |
| H  | 1.15970400  | 0.04257900  | -2.42232400 | H  | -3.48068300 | 2.71215000  | 0.77608400  |
| H  | 2.00381300  | -1.44474400 | -2.84306800 | H  | -2.76512600 | 1.66340300  | 1.99221400  |
|    |             |             |             | H  | -1.85360100 | 0.46316200  | -2.53661500 |
|    |             |             |             | H  | -0.17817600 | 0.62751000  | -2.13842500 |
|    |             |             |             | H  | -1.12533200 | 2.02674800  | -2.61996200 |

Structure 1a·CH3MgCl (l) [B3LYP/6-31G(d)]

|    |             |             |             |
|----|-------------|-------------|-------------|
| C  | 1.22239600  | -0.37805000 | 0.39725700  |
| C  | 0.61108200  | -1.61948000 | 0.22058800  |
| C  | 1.39977100  | -2.71191600 | -0.24872100 |
| C  | 2.72876300  | -2.55318600 | -0.53918500 |
| C  | 3.36487700  | -1.29268000 | -0.38482000 |
| C  | 4.73654000  | -1.09873300 | -0.68865200 |
| C  | 5.32314900  | 0.13728600  | -0.53230800 |
| C  | 4.56271400  | 1.23771100  | -0.06864900 |
| C  | 3.22962200  | 1.08794300  | 0.24006400  |
| C  | 2.59837800  | -0.17865500 | 0.09211300  |
| C  | -0.83157800 | -1.83593500 | 0.47480500  |
| O  | -1.67196800 | -0.94077000 | 0.61272300  |
| O  | 0.51890500  | 0.71708200  | 0.88470400  |
| C  | 0.45817300  | 0.79211500  | 2.33390700  |
| O  | -1.16895100 | -3.11563900 | 0.54420600  |
| C  | -2.58043600 | -3.41581400 | 0.72342500  |
| H  | 0.91964900  | -3.67339700 | -0.38137300 |
| H  | 3.31164500  | -3.39576700 | -0.90062800 |
| H  | 5.31540900  | -1.94407100 | -1.05099500 |
| H  | 6.37394300  | 0.27397300  | -0.77138800 |
| H  | 5.03326100  | 2.21063100  | 0.03679900  |
| H  | 2.64418900  | 1.93914800  | 0.56774500  |
| H  | -0.10024800 | 1.69695700  | 2.56995800  |
| H  | 1.47258900  | 0.84131400  | 2.73932200  |
| H  | -0.07503300 | -0.07655200 | 2.72663300  |
| H  | -2.64442300 | -4.49942700 | 0.63711300  |
| H  | -3.17850200 | -2.91485900 | -0.04038600 |
| H  | -2.89968000 | -3.08563200 | 1.71425300  |
| Mg | -2.68352500 | 0.49360800  | -0.45360900 |
| Mg | -0.43745000 | 2.33293800  | -0.35835700 |
| C  | -1.18443700 | 1.04840100  | -2.04008900 |
| H  | -1.78420100 | 0.27592400  | -2.55194200 |
| H  | -0.15150900 | 0.69520300  | -2.19870300 |
| H  | -1.30773600 | 1.92449600  | -2.69697900 |
| Cl | -2.46907800 | 2.37222400  | 1.04047400  |
| C  | 0.92041100  | 3.92543700  | -0.56282200 |
| H  | 1.40532200  | 4.21011900  | 0.38405400  |
| H  | 1.72841600  | 3.72308700  | -1.28119600 |
| H  | 0.40897400  | 4.83084500  | -0.92105600 |
| Cl | -4.57802800 | -0.55473100 | -1.13883600 |

Structure 1a·CH3MgCl (m) [B3LYP/6-31G(d)]

|   |             |             |             |
|---|-------------|-------------|-------------|
| C | 1.09342300  | -0.52691100 | 0.38890800  |
| C | 0.42704800  | -1.73241700 | 0.16960400  |
| C | 1.16857100  | -2.84321600 | -0.33219900 |
| C | 2.50542700  | -2.73394100 | -0.60914900 |
| C | 3.19486100  | -1.50717400 | -0.41642400 |
| C | 4.57436800  | -1.36443000 | -0.71148900 |
| C | 5.21066700  | -0.15732900 | -0.52519000 |
| C | 4.49417000  | 0.96396500  | -0.04219900 |
| C | 3.15518300  | 0.86487100  | 0.26248200  |
| C | 2.47525900  | -0.37337900 | 0.08800100  |
| C | -1.02562800 | -1.88776900 | 0.40657900  |
| O | -1.82761500 | -0.94949700 | 0.56704400  |
| O | 0.43953700  | 0.57903100  | 0.92954400  |

Structure 1a-TSOMe [B3LYP/6-31G(d)]

|    |             |             |             |
|----|-------------|-------------|-------------|
| C  | -0.10976000 | 1.30032400  | -0.08795100 |
| C  | 0.79406600  | 2.39036400  | 0.11746400  |
| C  | 2.13571300  | 2.19732600  | 0.26284000  |
| C  | 2.69309400  | 0.87888500  | 0.17540400  |
| C  | 1.83535000  | -0.24229800 | -0.02314000 |
| C  | -1.52480900 | 1.52045600  | -0.08467600 |
| O  | -2.39343000 | 0.61224000  | 0.04788700  |
| O  | -0.30998800 | -1.03584600 | -0.84775000 |
| Cl | -3.27656000 | -2.99059900 | 0.42013100  |
| C  | -0.23674200 | -0.85026700 | -2.27867900 |
| H  | 0.37509400  | 3.38935900  | 0.16802600  |
| H  | 2.80332500  | 3.03966500  | 0.41850700  |
| H  | -0.78191600 | -1.68998700 | -2.71226700 |
| H  | 0.80848400  | -0.87230200 | -2.59652600 |
| H  | -0.69844300 | 0.09690200  | -2.57036600 |
| Mg | -1.85130400 | -1.26296600 | 0.44309600  |
| C  | -0.15367500 | -0.94647800 | 1.89702500  |
| H  | 0.51569600  | -1.81023700 | 1.91492000  |
| H  | 0.32095000  | -0.10138800 | 2.39455600  |
| H  | -1.03747500 | -1.19936700 | 2.52646400  |
| C  | 0.39059500  | -0.04583800 | -0.05382500 |
| C  | 2.39865700  | -1.52920000 | -0.16859600 |
| C  | 3.76861600  | -1.71577900 | -0.11501600 |
| H  | 4.18621500  | -2.71211800 | -0.22730300 |
| C  | 4.61842800  | -0.61302000 | 0.09541900  |
| H  | 5.69408100  | -0.76021400 | 0.14392700  |
| C  | 4.08894900  | 0.65576100  | 0.23824700  |
| H  | 4.74497600  | 1.50895300  | 0.39257200  |
| H  | 1.73791200  | -2.37709500 | -0.31787100 |
| O  | -1.92233100 | 2.79573800  | -0.19207700 |
| C  | -3.33624800 | 3.04645100  | -0.11491200 |
| H  | -3.43969000 | 4.12518100  | -0.23272300 |
| H  | -3.86520400 | 2.52026300  | -0.91317000 |
| H  | -3.73314700 | 2.72681300  | 0.85188100  |

Structure 1a-TSCO [B3LYP/6-31G(d)]

|    |             |             |             |
|----|-------------|-------------|-------------|
| C  | 0.06343800  | 1.12676400  | -0.16783600 |
| C  | 0.90049000  | 2.26845000  | -0.05233500 |
| C  | 2.26565900  | 2.14135500  | 0.02945400  |
| C  | 2.88280500  | 0.86362900  | 0.04987200  |
| C  | 2.05945100  | -0.30639000 | -0.03681900 |
| C  | -1.44093300 | 1.26943000  | -0.22389900 |
| O  | -2.13867400 | 0.50357500  | -1.00026400 |
| O  | -0.14691400 | -1.27615700 | -0.28226900 |
| Cl | -3.32569500 | -2.84740800 | 0.53349600  |
| C  | -0.16009500 | -1.88894200 | -1.60703000 |
| H  | 0.43444300  | 3.24600700  | -0.04001300 |
| H  | 2.89172100  | 3.02727100  | 0.09745400  |
| H  | -0.75194300 | -2.80072000 | -1.50734500 |
| H  | 0.86065700  | -2.12906200 | -1.90890000 |
| H  | -0.62365700 | -1.19945700 | -2.31675200 |
| Mg | -2.16496900 | -0.94706300 | 0.31371900  |

|                     |                  |             |             |                     |                  |             |              |
|---------------------|------------------|-------------|-------------|---------------------|------------------|-------------|--------------|
| C                   | -1.81301200      | 0.63641400  | 1.83796900  | H                   | 5.97515400       | -0.78175200 | -0.07820900  |
| H                   | -1.38388000      | -0.21753600 | 2.39961500  | C                   | 4.34562700       | 0.50135100  | 0.44614100   |
| H                   | -1.27348000      | 1.51455300  | 2.18712000  | H                   | 4.98175100       | 1.30275300  | 0.81379900   |
| H                   | -2.86733100      | 0.74823400  | 2.13515300  | H                   | 2.05243300       | -2.39255900 | -0.77889700  |
| C                   | 0.65775600       | -0.12479400 | -0.19171600 | O                   | -2.05674300      | 0.77010100  | -0.48436900  |
| C                   | 2.66965300       | -1.58747100 | 0.06159900  | C                   | -3.27650000      | 1.43732200  | -0.81447500  |
| C                   | 4.03451600       | -1.70225300 | 0.20050000  | H                   | -3.60250400      | 1.03500500  | -1.77757400  |
| H                   | 4.48721100       | -2.68634100 | 0.28333900  | H                   | -4.06425000      | 1.25481600  | -0.07257800  |
| C                   | 4.85407900       | -0.54846500 | 0.24825500  | H                   | -3.11949200      | 2.51637800  | -0.91743900  |
| H                   | 5.92997300       | -0.65657600 | 0.35223900  |                     |                  |             |              |
| C                   | 4.28794300       | 0.70391800  | 0.18117500  | Structure 1a-TS2Ome | [B3LYP/6-31G(d)] |             |              |
| H                   | 4.90870800       | 1.59457300  | 0.23817000  | C                   | -0.02641000      | 1.30138500  | -0.16477900  |
| H                   | 2.04571400       | -2.47458400 | 0.05668700  | C                   | -0.97120200      | 2.27951400  | 0.30249100   |
| O                   | -1.80892400      | 2.56802500  | -0.08867300 | C                   | -2.29086000      | 2.00825200  | 0.46305400   |
| C                   | -3.18512200      | 2.86335600  | -0.35309800 | C                   | -2.80509900      | 0.69442700  | 0.16864200   |
| H                   | -3.28142900      | 3.94040900  | -0.20952900 | C                   | -1.93746100      | -0.32434300 | -0.30799300  |
| H                   | -3.45500600      | 2.58439800  | -1.37365000 | C                   | 1.34316700       | 1.63533100  | -0.23439900  |
| H                   | -3.83450500      | 2.33415000  | 0.35209400  | O                   | 2.31930400       | 0.81100000  | -0.38946300  |
|                     |                  |             |             | O                   | 0.32571800       | -1.17304600 | 0.54190200   |
| Structure 1a-intOme | [B3LYP/6-31G(d)] |             |             | Cl                  | 3.81083000       | -2.61437100 | 0.17895800   |
| C                   | -0.17132100      | 1.25273700  | 0.18208400  | C                   | -0.08467100      | -1.07547400 | 1.90714600   |
| C                   | 0.73970200       | 2.33973600  | -0.05274400 | H                   | -0.58702300      | 3.26560000  | 0.53961400   |
| C                   | 2.08239200       | 2.17534900  | -0.15027600 | H                   | -2.97721500      | 2.76914000  | 0.82273100   |
| C                   | 2.67299000       | 0.86064800  | -0.04137100 | H                   | 0.53633100       | -1.75501900 | 2.50083200   |
| C                   | 1.85801600       | -0.27290600 | 0.20385000  | H                   | -1.13135300      | -1.37710600 | 2.00695700   |
| C                   | -1.55034600      | 1.49015600  | 0.23460900  | H                   | 0.03050700       | -0.04904800 | 2.27967700   |
| O                   | -2.48278000      | 0.59321200  | 0.30693700  | Mg                  | 2.22374400       | -1.06667700 | 0.05184700   |
| O                   | -0.32107200      | -1.12387300 | -0.64252400 | C                   | 0.04156900       | -0.61881900 | -1.84807200  |
| Cl                  | -3.59017900      | -2.97977900 | -0.51193200 | H                   | -0.03480400      | -1.70832100 | -0.190624100 |
| C                   | 0.04054600       | -0.90428900 | -2.01851800 | H                   | -0.57434100      | -0.20123700 | -2.65013200  |
| H                   | 0.30774100       | 3.32885200  | -0.16110100 | H                   | 1.06948100       | -0.30963600 | -2.06539200  |
| H                   | 2.73499900       | 3.02382500  | -0.33374900 | C                   | -0.47516700      | -0.06408300 | -0.51128100  |
| H                   | -0.56822700      | -1.58303000 | -2.62274500 | C                   | -2.46776900      | -1.59823700 | -0.58312600  |
| H                   | 1.09712200       | -1.13826800 | -2.16549600 | C                   | -3.81701400      | -1.87631600 | -0.40624300  |
| H                   | -0.14940100      | 0.13662100  | -2.30357300 | H                   | -4.19949700      | -2.87054600 | -0.61844600  |
| Mg                  | -2.25723500      | -1.23810500 | -0.18671000 | C                   | -4.67673100      | -0.86762800 | 0.05222800   |
| C                   | -0.07598200      | -0.76579200 | 1.73428500  | H                   | -5.73489800      | -1.07423500 | 0.19036100   |
| H                   | 0.14129300       | -1.83738600 | 1.77934000  | C                   | -4.17476700      | 0.39213400  | 0.33530600   |
| H                   | 0.48367500       | -0.27601000 | 2.53557000  | H                   | -4.83730600      | 1.17502000  | 0.69688100   |
| H                   | -1.13603900      | -0.59207400 | 1.95816300  | H                   | -1.80577100      | -2.39171700 | -0.91496600  |
| C                   | 0.35821300       | -0.13943200 | 0.39359700  | O                   | 1.65516900       | 2.93754300  | -0.08748100  |
| C                   | 2.45171200       | -1.54189200 | 0.28447000  | C                   | 3.04540600       | 3.28202500  | -0.01813000  |
| C                   | 3.82512000       | -1.71141200 | 0.13466200  | H                   | 3.06267200       | 4.36506400  | 0.10914300   |
| H                   | 4.26046100       | -2.70469800 | 0.19522700  | H                   | 3.52981400       | 2.79414700  | 0.83268700   |
| C                   | 4.63488800       | -0.59239100 | -0.09425500 | H                   | 3.56489700       | 2.99933800  | -0.93689900  |
| H                   | 5.70942700       | -0.71037900 | -0.20834700 |                     |                  |             |              |
| C                   | 4.06393500       | 0.66906300  | -0.18188700 | Structure 1a-TS2CO  | [B3LYP/6-31G(d)] |             |              |
| H                   | 4.69014100       | 1.53847500  | -0.36815500 | C                   | -0.26087100      | 1.27435400  | -0.28988000  |
| H                   | 1.82521800       | -2.41500600 | 0.44461100  | C                   | -1.27824100      | 2.26779100  | -0.23812300  |
| O                   | -1.95187200      | 2.78023500  | 0.18107500  | C                   | -2.60145000      | 1.94014200  | -0.07500000  |
| C                   | -3.35932100      | 3.03406800  | 0.12329500  | C                   | -3.00661000      | 0.58319600  | -0.01840600  |
| H                   | -3.44990000      | 4.12033600  | 0.07775000  | C                   | -2.00768000      | -0.44410700 | -0.06942400  |
| H                   | -3.80784900      | 2.58278300  | -0.76694000 | C                   | 1.12189700       | 1.67501200  | -0.71763600  |
| H                   | -3.86658600      | 2.65030800  | 1.01231200  | O                   | 1.72506000       | 0.93138400  | -1.54485600  |
|                     |                  |             |             | O                   | 0.33687400       | -1.05512500 | -0.01275500  |
| Structure 1a-intCO  | [B3LYP/6-31G(d)] |             |             | Cl                  | 3.63193700       | -2.37759500 | -0.56073000  |
| C                   | 0.09509000       | 0.93763100  | 0.65837200  | C                   | 0.39506100       | -1.69812700 | 1.29921100   |
| C                   | 0.96972200       | 1.94423500  | 1.14699800  | H                   | -0.99719500      | 3.30990900  | -0.34212800  |
| C                   | 2.33697400       | 1.83420400  | 1.05025000  | H                   | -3.35686900      | 2.71968400  | -0.02686300  |
| C                   | 2.93629900       | 0.67438700  | 0.50173600  | H                   | 1.15286100       | -2.47830800 | 1.20510200   |
| C                   | 2.08790300       | -0.36936200 | 0.00858800  | H                   | -0.56876500      | -2.13747400 | 1.55425100   |
| C                   | -1.42380100      | 0.98993800  | 0.94810500  | H                   | 0.68953000       | -0.95897300 | 2.04738400   |
| O                   | -1.81665200      | -0.06846500 | 1.67781200  | Mg                  | 2.41307200       | -0.50233700 | -0.34585700  |
| O                   | -0.13272000      | -1.17154900 | -0.51765000 | C                   | 1.56325700       | 3.10894400  | -0.57608700  |
| Cl                  | -3.29971200      | -2.91331900 | -0.70550600 | H                   | 1.12860500       | 3.70607600  | -1.38888500  |
| C                   | -0.14313600      | -1.15708700 | -1.97659900 | H                   | 1.26215100       | 3.54494400  | 0.37916700   |
| H                   | 0.54775600       | 2.82943000  | 1.60810500  | C                   | 2.64908400       | 3.14251900  | -0.67215500  |
| H                   | 2.97514500       | 2.63198200  | 1.42149500  | H                   | -0.63756800      | -0.05656100 | -0.12166000  |
| H                   | -0.78792700      | -1.98459500 | -2.27847500 | C                   | -2.42867200      | -1.80373000 | -0.12013700  |
| H                   | 0.86878700       | -1.30567300 | -2.35537800 | C                   | -3.76517800      | -2.12707300 | -0.06853700  |
| H                   | -0.54809400      | -0.20275900 | -2.32071300 | H                   | -4.07029200      | -3.16794700 | -0.12701400  |
| Mg                  | -2.10614200      | -1.24283300 | 0.19109100  | C                   | -4.74858900      | -1.11386400 | 0.04236300   |
| C                   | -1.91255100      | 2.31529200  | 1.52372100  | H                   | -5.79895600      | -1.38607400 | 0.09308800   |
| H                   | -1.45345500      | 2.45419300  | 2.50603000  | C                   | -4.37532000      | 0.20968800  | 0.05754200   |
| H                   | -1.67591800      | 3.17833900  | 0.89312900  | H                   | -5.12512900      | 0.99491300  | 0.11061700   |
| H                   | -2.99120000      | 2.26060700  | 1.68163400  | H                   | -1.68741900      | -2.58425900 | -0.25077400  |
| C                   | 0.68053900       | -0.16585600 | 0.05421200  | O                   | 2.27665500       | 0.90418800  | 0.93965200   |
| C                   | 2.68671300       | -1.56925400 | -0.46897300 | C                   | 2.37681900       | 1.35525300  | 2.25112600   |
| C                   | 4.05598700       | -1.70779600 | -0.49285400 | H                   | 3.19801000       | 0.85444300  | 2.78876100   |
| H                   | 4.49726700       | -2.63500500 | -0.84778300 | H                   | 2.58278200       | 2.43876700  | 2.29170500   |
| C                   | 4.89630000       | -0.65881100 | -0.04596500 | H                   | 1.45196500       | 1.17985600  | 2.83199500   |

|                                         |             |             |             |                                         |             |             |             |
|-----------------------------------------|-------------|-------------|-------------|-----------------------------------------|-------------|-------------|-------------|
| Structure 1a-prodOMe [B3LYP/6-31G(d)]   |             |             |             | C                                       | 1.57407900  | 1.39978000  | -0.13073000 |
| C                                       | 0.07572900  | 1.62016500  | 0.24959400  | C                                       | 2.83188600  | 1.98453100  | 0.21938300  |
| C                                       | 0.92731100  | 2.72820200  | 0.54090300  | C                                       | 3.93107700  | 1.22347600  | 0.48674000  |
| C                                       | 2.26078200  | 2.54106300  | 0.77189900  | C                                       | 3.86855200  | -0.20504600 | 0.37632600  |
| C                                       | 2.82051600  | 1.23639300  | 0.73494700  | C                                       | 2.63542400  | -0.83625600 | 0.04149900  |
| C                                       | 1.97928000  | 0.11562900  | 0.42257100  | C                                       | 0.41121400  | 2.21907900  | -0.29266300 |
| C                                       | -1.36369900 | 1.90322100  | 0.10341600  | O                                       | -0.77696900 | 1.78966300  | -0.30449600 |
| O                                       | -2.27589400 | 1.08672400  | 0.32034100  | O                                       | 0.42984200  | -0.61345800 | -0.95476900 |
| O                                       | -2.63946400 | -1.62364400 | 1.86081200  | C                                       | 0.67950500  | -0.49722100 | -2.37265500 |
| Cl                                      | -4.81805200 | 1.50112300  | 2.56020200  | H                                       | 2.88716700  | 3.06612100  | 0.27565600  |
| C                                       | -2.82444600 | -2.82614500 | 2.53659800  | H                                       | 4.87628700  | 1.68833100  | 0.75151600  |
| H                                       | 0.49421400  | 3.72004600  | 0.59056600  | H                                       | -0.14445200 | -1.02255600 | -2.85639000 |
| H                                       | 2.90451500  | 3.38578800  | 1.00187000  | H                                       | 1.63238100  | -0.97308300 | -2.61786500 |
| H                                       | -3.69352300 | -2.81696500 | 3.21812400  | H                                       | 0.69523600  | 0.55233600  | -2.67932200 |
| H                                       | -1.94347000 | -3.08607500 | 3.15013900  | Mg                                      | -1.19493100 | -0.09322800 | 0.21440700  |
| H                                       | -2.98055500 | -3.66489500 | 1.83502900  | C                                       | 0.39475600  | -0.62073800 | 1.76774000  |
| Mg                                      | -3.30823600 | 0.06361800  | 1.69728000  | H                                       | 0.60064300  | -1.69522600 | 1.77543500  |
| C                                       | -0.27222300 | -0.84871600 | -0.29554700 | H                                       | 1.17857600  | -0.10314500 | 2.32115400  |
| H                                       | 0.32844300  | -1.60412500 | -0.80566000 | C                                       | -0.53197500 | -0.44361000 | 2.35233600  |
| H                                       | -0.79646500 | -1.32450000 | 0.54618800  | H                                       | 1.42802200  | -0.02876300 | -0.09960400 |
| C                                       | -1.04805600 | -0.52822800 | -0.99341600 | C                                       | 2.59796900  | -2.23748400 | -0.12716100 |
| H                                       | 0.58336300  | 0.31688000  | 0.14304200  | C                                       | 3.73881200  | -3.00419100 | 0.03376000  |
| C                                       | 2.57593300  | -1.17860300 | 0.42422000  | H                                       | 3.69348800  | -4.08122300 | -0.09976000 |
| C                                       | 3.91285600  | -1.35216800 | 0.70471600  | C                                       | 4.95526600  | -2.38621900 | 0.38082100  |
| H                                       | 4.33731400  | -2.35206500 | 0.70861300  | H                                       | 5.84984200  | -2.98875100 | 0.51449300  |
| C                                       | 4.73636100  | -0.23967800 | 0.99152900  | C                                       | 5.01552600  | -1.01541500 | 0.54880200  |
| H                                       | 5.79135700  | -0.38773700 | 1.20469900  | H                                       | 5.95640600  | -0.53598300 | 0.80788400  |
| C                                       | 4.19703700  | 1.02614800  | 1.00652700  | O                                       | 1.65426500  | -2.70874700 | -0.38220400 |
| H                                       | 4.81820000  | 1.88861400  | 1.23480600  | H                                       | 0.63173300  | 3.53728600  | -0.40145300 |
| H                                       | 1.96570200  | -2.05143100 | 0.22679000  | C                                       | -0.52511800 | 4.38691100  | -0.47915200 |
| O                                       | -1.64239400 | 3.14475500  | -0.26746400 | H                                       | -0.12885600 | 5.40050400  | -0.54297900 |
| C                                       | -3.04075800 | 3.52706500  | -0.32496000 | H                                       | -1.11749100 | 4.15140600  | -1.36692900 |
| H                                       | -3.02726600 | 4.59678900  | -0.52915000 | H                                       | -1.14897000 | 4.27360000  | 0.41085200  |
| H                                       | -3.53523600 | 2.98707700  | -1.13556100 | Structure 1a-TSOMe (k) [B3LYP/6-31G(d)] |             |             |             |
| H                                       | -3.53807200 | 3.30784600  | 0.62211700  | C                                       | -1.17975700 | -1.89679300 | -0.04517500 |
| Structure 1a-prodCO [B3LYP/6-31G(d)]    |             |             |             | C                                       | 0.23642500  | -1.73026100 | -0.09006300 |
| C                                       | -0.18195200 | 1.20740600  | -0.91258200 | C                                       | 0.85525400  | -0.44098900 | -0.04599700 |
| C                                       | 0.63564900  | 2.36037300  | -1.11389100 | O                                       | -2.02759000 | -0.97303100 | 0.10508200  |
| C                                       | 1.97225000  | 2.35224400  | -0.81341200 | Mg                                      | -0.22943200 | 1.99511500  | -0.49432200 |
| C                                       | 2.59190600  | 1.19069700  | -0.27923000 | Mg                                      | -3.55425800 | 0.22713800  | 0.17354200  |
| C                                       | 1.80082700  | 0.01515800  | -0.06856100 | Cl                                      | -2.62757300 | 2.25052400  | -0.65182000 |
| C                                       | -1.63297100 | 1.27674400  | -1.20576000 | C                                       | 0.43102600  | 0.43845500  | -1.94664000 |
| O                                       | -2.44796800 | 0.47076600  | -0.73640500 | H                                       | -0.52904800 | 0.00016800  | -2.24402000 |
| O                                       | -0.30754100 | -1.11751100 | -0.26243600 | H                                       | 1.23482600  | -0.20281200 | -2.30192200 |
| Cl                                      | -3.20731600 | -2.87588700 | 0.33412400  | H                                       | 0.58095000  | 1.39408700  | -2.49903500 |
| C                                       | -0.23083500 | -2.04074900 | -1.38669200 | Cl                                      | 0.82757800  | 3.94449300  | -0.08342600 |
| H                                       | 0.18268900  | 3.26850000  | -1.49509300 | C                                       | -5.47979400 | -0.21783900 | 0.84873700  |
| H                                       | 2.57258500  | 3.24427900  | -0.96893000 | H                                       | -6.03735200 | -0.83565000 | 0.13057900  |
| H                                       | -0.87392100 | -2.87808900 | -1.11805100 | H                                       | -6.07509000 | 0.69026500  | 1.00916000  |
| H                                       | 0.80584600  | -2.35670900 | -1.52714400 | H                                       | -5.47657800 | -0.76744500 | 1.80029800  |
| H                                       | -0.60614700 | -1.55179200 | -2.29052500 | C                                       | 2.41818500  | -2.77138700 | -0.48614100 |
| Mg                                      | -2.17665600 | -0.89941100 | 0.80296100  | H                                       | 3.01745900  | -3.64101700 | -0.73990600 |
| C                                       | -2.16164600 | 2.38290400  | -2.08978300 | C                                       | 3.08606900  | -1.54096600 | -0.16289700 |
| H                                       | -2.16062400 | 3.33158600  | -1.53795100 | C                                       | 2.31826600  | -0.38327900 | 0.14619000  |
| H                                       | -1.55116200 | 2.51975700  | -2.98758800 | C                                       | 1.06369500  | -2.85878900 | -0.42797600 |
| H                                       | -3.19081900 | 2.14735200  | -2.36473800 | H                                       | 0.56997000  | -3.80037900 | -0.63566400 |
| C                                       | 0.42458200  | 0.05090200  | -0.41920900 | O                                       | -1.60590600 | -3.16620200 | -0.17841000 |
| C                                       | 2.40545800  | -1.13830000 | 0.50240700  | C                                       | -3.01844100 | -3.41079700 | -0.17544500 |
| C                                       | 3.74233800  | -1.13153900 | 0.82839500  | H                                       | -3.11940500 | -4.49387500 | -0.24630600 |
| H                                       | 4.19478300  | -2.01223900 | 1.27449200  | H                                       | -3.49842000 | -2.93617800 | -1.03684100 |
| C                                       | 4.53179400  | 0.02156400  | 0.59924200  | H                                       | -3.48060700 | -3.04783200 | 0.74618300  |
| H                                       | 5.58608000  | 0.00999400  | 0.86071500  | C                                       | 2.98476100  | 0.80976300  | 0.49851500  |
| C                                       | 3.96803200  | 1.15760300  | 0.06258500  | C                                       | 4.36869200  | 0.86144700  | 0.54810300  |
| H                                       | 4.56847000  | 2.04882500  | -0.09951800 | H                                       | 4.86147200  | 1.79122800  | 0.81615700  |
| H                                       | 1.79231100  | -2.00929300 | 0.70408500  | C                                       | 5.12902700  | -0.27928000 | 0.23858000  |
| O                                       | -1.72156800 | 0.14139200  | 2.22990300  | H                                       | 6.21425100  | -0.23468000 | 0.27199600  |
| C                                       | -1.69542100 | 0.29741800  | 3.60409800  | C                                       | 4.49508000  | -1.45782500 | -0.11263000 |
| H                                       | -0.66468800 | 0.42937300  | 3.98645400  | H                                       | 5.07713000  | -2.34465200 | -0.35100700 |
| H                                       | -2.26152700 | 1.18994500  | 3.93243200  | H                                       | 2.41659600  | 1.70920500  | 0.71507900  |
| H                                       | -2.12419000 | -0.56197200 | 4.15338900  | O                                       | 0.18290200  | 0.54259200  | 0.84437900  |
| Structure 1a-TSOMe (b) [B3LYP/6-31G(d)] |             |             |             | C                                       | 0.18032300  | 0.32169800  | 2.27011200  |
| Cl                                      | -3.19100900 | 0.30747000  | 1.66459500  | H                                       | 1.20268100  | 0.19028900  | 2.63170100  |
| Cl                                      | -2.68241900 | -1.43828800 | -1.23214300 | H                                       | -0.25869500 | 1.21850600  | 2.70993100  |
| Mg                                      | -4.56426100 | -0.93237000 | 0.16704300  | H                                       | -0.42406500 | -0.55737900 | 2.50814200  |
| C                                       | -6.58928700 | -1.41824400 | 0.06881500  | Structure 1a-TSOMe (l) [B3LYP/6-31G(d)] |             |             |             |
| H                                       | -6.86863200 | -2.14287300 | 0.84551800  | C                                       | -0.91684700 | -1.77609700 | -0.07739700 |
| H                                       | -7.22842100 | -0.53708700 | 0.21278900  | C                                       | 0.49539200  | -1.57237100 | -0.10587600 |
| H                                       | -6.85984500 | -1.86206900 | -0.89796100 | C                                       | 1.08384700  | -0.27413500 | 0.05775200  |
|                                         |             |             |             | O                                       | -1.78713800 | -0.87247300 | 0.07688800  |

|    |             |             |             |    |             |             |             |
|----|-------------|-------------|-------------|----|-------------|-------------|-------------|
| Cl | -5.26170900 | -0.17171800 | 0.62129700  | C  | -0.65088100 | -1.30870200 | 0.28533200  |
| Mg | 0.14958800  | 2.25111200  | -0.53084400 | C  | -1.47762200 | -2.38805500 | 0.70187600  |
| Mg | -3.19703900 | 0.41095900  | 0.02841500  | C  | -2.83877400 | -2.34327000 | 0.52589400  |
| Cl | -2.35055100 | 2.45179800  | -0.65190000 | C  | -3.47176900 | -1.20018100 | -0.02793700 |
| C  | 1.09308900  | 4.10350400  | -0.21354100 | C  | -4.88090400 | -1.11171700 | -0.17788800 |
| H  | 2.07069100  | 4.17706000  | -0.71219900 | C  | -5.46715300 | 0.03425800  | -0.66459700 |
| H  | 1.27165000  | 4.32510100  | 0.85000300  | C  | -4.66935600 | 1.15301700  | -1.00742300 |
| H  | 0.48449000  | 4.93503100  | -0.59698200 | C  | -3.29899000 | 1.10034600  | -0.88879300 |
| C  | 0.65819400  | 0.58887200  | -1.98603100 | C  | -2.66477700 | -0.08296800 | -0.42001400 |
| H  | -0.28435900 | 0.08622000  | -2.22844400 | C  | 0.84008700  | -1.37642800 | 0.47367300  |
| H  | 1.48890700  | -0.02684100 | -2.32814900 | O  | 1.62267700  | -0.91945700 | -0.43543100 |
| H  | 0.72706000  | 1.51768600  | -2.59493300 | O  | -0.46022800 | 0.88303900  | -0.67525200 |
| C  | 2.70282500  | -2.56047700 | -0.49378700 | Cl | 0.14612200  | 3.46313300  | 1.46327100  |
| C  | 3.33968500  | -1.32213700 | -0.14271400 | C  | -0.21928500 | 1.00710300  | -2.09973900 |
| C  | 2.54186300  | -0.18835700 | 0.18042300  | O  | 1.18762700  | -2.50263300 | 1.13966000  |
| C  | 4.74613100  | -1.20922500 | -0.07473500 | C  | 2.56386700  | -2.88349300 | 1.14702300  |
| C  | 5.35071400  | -0.02644700 | 0.31122600  | H  | -1.00886200 | -3.25523800 | 1.14920000  |
| H  | 6.43415500  | 0.04063500  | 0.35897900  | H  | -3.45267400 | -3.18702400 | 0.82971100  |
| C  | 4.56186100  | 1.08883400  | 0.64246000  | H  | -5.48987300 | -1.96425400 | 0.11180500  |
| H  | 5.03196500  | 2.01976000  | 0.94539000  | H  | -6.54677000 | 0.09182300  | -0.76973300 |
| C  | 3.18042500  | 1.00712800  | 0.57456900  | H  | -5.14513400 | 2.06573000  | -1.35424100 |
| H  | 2.58752000  | 1.88350400  | 0.81581500  | H  | -2.69623400 | 1.97372100  | -1.11158200 |
| O  | 0.37565400  | 0.70373500  | 0.81920700  | H  | 0.35604700  | 1.92444200  | -2.23180100 |
| C  | 0.32759300  | 0.48536200  | 2.24469600  | H  | -1.17252500 | 1.08263400  | -2.62602100 |
| H  | -0.15095600 | 1.37099900  | 2.66649000  | H  | 0.34344000  | 0.13945800  | -2.45177000 |
| H  | 1.33786200  | 0.37794700  | 2.64740900  | H  | 2.61468600  | -3.77286400 | -1.75788700 |
| H  | -0.26443400 | -0.40667800 | 2.46509500  | H  | 3.18654300  | -2.09592700 | 1.58585700  |
| C  | 1.34990200  | -2.67805500 | -0.44990100 | H  | 2.91478700  | -3.12275700 | 0.13849500  |
| H  | 0.87846600  | -3.62676400 | -0.67618200 | Mg | 3.40209600  | -0.39284500 | -1.04591400 |
| H  | 3.32322000  | -3.41260300 | -0.75585000 | Mg | 0.96246900  | 1.46689500  | 0.76123000  |
| H  | 5.34996800  | -2.07769000 | -0.32599200 | Cl | 3.13079900  | 1.83977700  | -0.31016600 |
| O  | -1.31566400 | -3.04787300 | -0.22326400 | C  | 4.87730500  | -1.46766400 | -2.05837500 |
| C  | -2.72747700 | -3.32145100 | -0.23781000 | H  | 4.46803500  | -2.32198400 | -2.61457200 |
| H  | -2.80278100 | -4.40707900 | -0.29611500 | H  | 5.41154400  | -0.83989300 | -2.78381600 |
| H  | -3.20064500 | -2.86680300 | -1.11285500 | H  | 5.63835100  | -1.86883400 | -1.37457700 |
| H  | -3.21095100 | -2.95249800 | 0.66927500  | C  | 1.02983600  | -0.12619200 | 2.34165100  |

Structure 1a-TSCO (b) [B3LYP/6-31G(d)]

|    |             |             |             |
|----|-------------|-------------|-------------|
| Cl | -3.73663000 | 0.95007600  | -0.22115900 |
| Cl | -2.24455300 | -2.07104200 | 0.25409300  |
| Mg | -4.50015300 | -1.24617100 | 0.27561400  |
| C  | -6.34530600 | -2.15975700 | 0.60146100  |
| H  | -7.17839300 | -1.54192100 | 0.24212900  |
| H  | -6.41656700 | -3.13064100 | 0.09357700  |
| H  | -6.52114200 | -2.34653600 | 1.66939400  |
| C  | 1.59693000  | 1.27159000  | -0.05879400 |
| C  | 2.76778700  | 1.97088000  | 0.33648300  |
| C  | 3.96339300  | 1.31361200  | 0.49619700  |
| C  | 4.05633700  | -0.09150100 | 0.31702800  |
| C  | 2.88167100  | -0.82379500 | -0.05517900 |
| C  | 0.27177900  | 1.97864600  | -0.20499600 |
| O  | -0.53755600 | 1.64131400  | -1.15691100 |
| O  | 0.53199100  | -0.80510000 | -0.64793900 |
| C  | 0.49132700  | -1.15288800 | -2.05856200 |
| H  | 2.69640200  | 3.03942500  | 0.49919100  |
| H  | 4.85544600  | 1.86615700  | 0.77992000  |
| H  | -0.35370400 | -1.83444200 | -2.17609600 |
| H  | 1.41592600  | -1.65921900 | -2.34274300 |
| H  | 0.35090200  | -0.24553300 | -2.65180700 |
| Mg | -1.37057100 | 0.21067500  | -0.09231800 |
| C  | -0.56756300 | 1.29741300  | 1.69011900  |
| H  | -0.74784500 | 0.28598900  | 2.11290800  |
| H  | 0.30112400  | 1.67598900  | 2.22587000  |
| H  | -1.43110800 | 1.92931400  | 1.93336500  |
| C  | 1.68251900  | -0.09185200 | -0.27760800 |
| C  | 2.95681200  | -2.23991600 | -0.16245600 |
| C  | 4.14898700  | -2.89463100 | 0.05149000  |
| H  | 4.19109100  | -3.97756200 | -0.02510700 |
| C  | 5.31961900  | -2.17023100 | 0.38294200  |
| H  | 6.25375300  | -2.70109900 | 0.54348900  |
| C  | 5.26962000  | -0.80168600 | 0.51884400  |
| H  | 6.15997900  | -0.24126900 | 0.79315600  |
| H  | 2.05672600  | -2.80253000 | -0.38549800 |
| O  | 0.38261700  | 3.29140100  | 0.12226200  |
| C  | -0.74112300 | 4.11758600  | -0.20639400 |
| H  | -0.47584600 | 5.11613800  | 0.14405100  |
| H  | -0.91911700 | 4.12215400  | -1.28387200 |
| H  | -1.64197500 | 3.76623800  | 0.30589500  |

Structure 1a-TSCO (k) [B3LYP/6-31G(d)]

|   |             |             |             |
|---|-------------|-------------|-------------|
| C | -1.25487700 | -0.20489400 | -0.29223700 |
|---|-------------|-------------|-------------|

|    |             |             |             |
|----|-------------|-------------|-------------|
| C  | -0.65088100 | -1.30870200 | 0.28533200  |
| C  | -1.47762200 | -2.38805500 | 0.70187600  |
| C  | -2.83877400 | -2.34327000 | 0.52589400  |
| C  | -3.47176900 | -1.20018100 | -0.02793700 |
| C  | -4.88090400 | -1.11171700 | -0.17788800 |
| C  | -5.46715300 | 0.03425800  | -0.66459700 |
| C  | -4.66935600 | 1.15301700  | -1.00742300 |
| C  | -3.29899000 | 1.10034600  | -0.88879300 |
| C  | -2.66477700 | -0.08296800 | -0.42001400 |
| C  | 0.84008700  | -1.37642800 | 0.47367300  |
| O  | 1.62267700  | -0.91945700 | -0.43543100 |
| O  | -0.46022800 | 0.88303900  | -0.67525200 |
| Cl | 0.14612200  | 3.46313300  | 1.46327100  |
| C  | -0.21928500 | 1.00710300  | -2.09973900 |
| O  | 1.18762700  | -2.50263300 | 1.13966000  |
| C  | 2.56386700  | -2.88349300 | 1.14702300  |
| H  | -1.00886200 | -3.25523800 | 1.14920000  |
| H  | -3.45267400 | -3.18702400 | 0.82971100  |
| H  | -5.48987300 | -1.96425400 | 0.11180500  |
| H  | -6.54677000 | 0.09182300  | -0.76973300 |
| H  | -5.14513400 | 2.06573000  | -1.35424100 |
| H  | -2.69623400 | 1.97372100  | -1.11158200 |
| H  | 0.35604700  | 1.92444200  | -2.23180100 |
| H  | -1.17252500 | 1.08263400  | -2.62602100 |
| H  | 0.34344000  | 0.13945800  | -2.45177000 |
| H  | 2.61468600  | -3.77286400 | -1.75788700 |
| H  | 3.18654300  | -2.09592700 | 1.58585700  |
| H  | 2.91478700  | -3.12275700 | 0.13849500  |
| Mg | 3.40209600  | -0.39284500 | -1.04591400 |
| Mg | 0.96246900  | 1.46689500  | 0.76123000  |
| Cl | 3.13079900  | 1.83977700  | -0.31016600 |
| C  | 4.87730500  | -1.46766400 | -2.05837500 |
| H  | 4.46803500  | -2.32198400 | -2.61457200 |
| H  | 5.41154400  | -0.83989300 | -2.78381600 |
| H  | 5.63835100  | -1.86883400 | -1.37457700 |
| C  | 1.02983600  | -0.12619200 | 2.34165100  |
| H  | 0.86310400  | 0.85366800  | 2.83734600  |
| H  | 0.29779300  | -0.78803200 | 2.80378500  |
| H  | 2.03444500  | -0.44729800 | 2.63695400  |

Structure 1a-TSCO (l) [B3LYP/6-31G(d)]

|    |             |             |             |
|----|-------------|-------------|-------------|
| C  | 1.34468000  | 0.12528700  | -0.37031500 |
| C  | 0.64313100  | 1.25477500  | 0.01532600  |
| C  | 1.39817200  | 2.36808800  | 0.48381600  |
| C  | 2.76931100  | 2.33175000  | 0.54141600  |
| C  | 3.49250300  | 1.17488600  | 0.15397000  |
| C  | 4.90916200  | 1.10634300  | 0.21832400  |
| C  | 5.57581000  | -0.04330900 | -0.13856500 |
| C  | 4.85138100  | -1.18143500 | -0.56799200 |
| C  | 3.47725800  | -1.14966700 | -0.64741100 |
| C  | 2.76330800  | 0.02998800  | -0.30057400 |
| C  | -0.87133800 | 1.36453800  | -0.08223700 |
| O  | -1.49802200 | 0.85873400  | -1.09894900 |
| O  | 0.64708200  | -1.02732500 | -0.76950400 |
| C  | 0.46299800  | -1.18722400 | -2.20629800 |
| O  | -1.23921000 | 2.60367300  | 0.35560300  |
| C  | -2.50134600 | 3.13035100  | -0.07919200 |
| H  | 0.86233200  | 3.25765700  | 0.78605100  |
| H  | 3.31911500  | 3.20088500  | 0.89297800  |
| H  | 5.45744500  | 1.97976100  | 0.56182700  |
| H  | 6.65975500  | -0.08547200 | -0.08309400 |
| H  | 5.38528100  | -2.09015700 | -0.83066200 |
| H  | 2.93024100  | -2.03252000 | -0.95900400 |
| H  | -0.03965100 | -2.14469400 | -2.34213100 |
| H  | 1.44323400  | -1.19429300 | -2.68783100 |
| H  | -0.15825800 | -0.37047700 | -2.57206800 |
| H  | -2.53637000 | 4.14314700  | 0.32423600  |
| H  | -3.34199900 | 2.55028000  | 0.31461500  |
| H  | -2.55613200 | 3.15010200  | -1.16995900 |
| Mg | -2.91151000 | -0.21386800 | -0.28917000 |
| Mg | -0.30621600 | -1.90624100 | 0.84449100  |
| Cl | -2.30474600 | -2.52346300 | -0.33529500 |
| C  | -1.52000800 | 0.35281500  | 1.67536600  |
| H  | -1.57276600 | -0.65226700 | 2.14428900  |
| H  | -0.82862600 | 0.92112800  | 2.29888100  |
| H  | -2.51489800 | 0.78620300  | 1.87095600  |
| Cl | -5.08242000 | 0.32236600  | -0.10284300 |
| C  | 0.77767200  | -2.83694700 | 2.36269600  |
| H  | 0.11860900  | -3.25347600 | 3.13676500  |
| H  | 1.37988000  | -3.67342400 | 1.98037900  |
| H  | 1.47238500  | -2.15451200 | 2.87108800  |

| Structure 1a·CH3MgCl (DME) (d)_I [B3LYP/6-31G(d)]  |             |             |             | Structure 1a·CH3MgCl (DME) (d')_I [B3LYP/6-31G(d)]  |             |             |             |
|----------------------------------------------------|-------------|-------------|-------------|-----------------------------------------------------|-------------|-------------|-------------|
| C                                                  | 2.20800700  | -0.18989800 | 0.38384400  | C                                                   | -1.92655500 | 0.18499300  | -0.01654800 |
| C                                                  | 1.97267900  | -1.29685900 | -0.42851700 | C                                                   | -1.37368500 | 0.60597700  | -1.22279800 |
| C                                                  | 2.75436900  | -1.47337400 | -1.60824800 | C                                                   | -1.36253600 | -0.29563300 | -0.22623900 |
| C                                                  | 3.72128100  | -0.56712300 | -1.95313600 | C                                                   | -1.87070500 | -1.56128000 | -2.20135500 |
| C                                                  | 3.95820500  | 0.58645700  | -1.15606000 | C                                                   | -2.40939800 | -2.01608500 | -0.96913800 |
| C                                                  | 3.18061000  | 0.78785100  | 0.02949900  | C                                                   | -2.43348500 | -1.12878100 | 0.15585900  |
| O                                                  | 1.49469900  | -0.00360400 | 1.55093200  | O                                                   | -1.99609600 | 1.06026100  | 1.07065700  |
| C                                                  | 2.14750500  | -0.52158300 | 2.73391600  | C                                                   | -3.27254400 | 1.73866700  | 1.21514600  |
| H                                                  | 2.56211800  | -2.33880500 | -2.23067500 | H                                                   | -0.92008700 | 0.03276100  | -3.25835200 |
| H                                                  | 4.31045700  | -0.71283300 | -2.85429100 | H                                                   | -1.83830300 | -2.24537100 | -3.04390000 |
| H                                                  | 1.48863400  | -0.27590500 | 3.56471500  | H                                                   | -3.17765700 | 2.36774400  | 2.10000500  |
| H                                                  | 3.12674600  | -0.04924700 | 2.85859900  | H                                                   | -4.06705300 | 1.00016600  | 1.34443500  |
| H                                                  | 2.26464900  | -1.60786000 | 2.65664800  | H                                                   | -3.46897200 | 2.35525400  | 0.33268400  |
| Mg                                                 | -0.92871700 | -0.41640700 | 1.55416200  | Mg                                                  | -0.25013700 | 2.23162100  | 1.58246600  |
| Cl                                                 | -3.10480400 | -1.27222600 | 0.50703900  | Cl                                                  | 1.35597900  | 0.49987400  | 1.83476200  |
| C                                                  | -1.15722200 | -0.10795800 | 3.63395300  | C                                                   | -0.77806500 | 3.74833300  | 2.93819300  |
| H                                                  | -0.82723800 | -0.96365600 | 4.24541600  | H                                                   | -1.48531500 | 4.48475000  | 2.52654700  |
| H                                                  | -0.63286700 | 0.77613600  | 4.03065600  | H                                                   | -1.23264500 | 3.36224700  | 3.86333300  |
| H                                                  | -2.21857900 | 0.03584600  | 3.88665800  | H                                                   | 0.10247400  | 4.32395200  | 3.25871800  |
| Cl                                                 | -0.93261000 | 1.35121300  | -0.20302800 | Cl                                                  | 1.71545600  | -2.53006800 | -0.65207400 |
| C                                                  | 0.90919300  | -2.26538600 | -0.09855100 | C                                                   | -0.75470100 | 1.94080300  | -1.36790100 |
| O                                                  | 0.00616500  | -2.08972700 | 0.72635300  | O                                                   | -0.33991600 | 2.64124000  | -0.43188300 |
| C                                                  | 3.38488700  | 1.95942900  | 0.80704900  | C                                                   | -2.93825400 | -1.59536000 | 1.40064700  |
| C                                                  | 4.33744200  | 2.88165900  | 0.43702500  | C                                                   | -3.41747400 | -2.87950300 | 1.51704100  |
| H                                                  | 4.48120400  | 3.77983600  | 1.03056000  | H                                                   | -3.78914500 | -3.23306200 | 2.47437200  |
| C                                                  | 5.12369700  | 2.67454000  | -0.72184800 | C                                                   | -3.41344300 | -3.75245400 | 0.40187000  |
| H                                                  | 5.87246600  | 3.41070900  | -1.00069900 | H                                                   | -3.79191200 | -4.76462300 | 0.51204200  |
| C                                                  | 4.93451500  | 1.55562900  | -1.50231300 | C                                                   | -2.91616900 | -3.33134800 | -0.81021800 |
| H                                                  | 5.52642500  | 1.40249900  | -2.40097000 | H                                                   | -2.89046000 | -4.00550400 | -1.66179700 |
| H                                                  | 2.75896000  | 2.12652200  | 1.67627200  | H                                                   | -2.90964700 | -0.93935800 | 2.26354100  |
| O                                                  | 0.98142000  | -3.39620900 | -0.79614100 | O                                                   | -0.66145300 | 2.34759200  | -2.62315600 |
| C                                                  | -0.09223600 | -4.34570200 | -0.59352300 | C                                                   | 0.06135900  | 3.57962000  | -2.86793200 |
| H                                                  | 0.09058300  | -5.13518500 | -1.32145700 | H                                                   | -0.03721800 | 3.75039900  | -3.93907400 |
| H                                                  | -0.05406000 | -4.73993100 | 0.42438000  | H                                                   | -0.38526300 | 4.39686500  | -2.29874400 |
| H                                                  | -1.05752700 | -3.86473900 | -0.76214100 | H                                                   | 1.10735800  | 3.44234200  | -2.58750600 |
| Mg                                                 | -2.96006000 | 0.42811600  | -1.20797600 | Mg                                                  | 2.45763100  | -0.36581600 | -0.27183100 |
| O                                                  | -4.38452500 | 1.79898700  | -0.45086200 | O                                                   | 4.32622000  | -0.84250400 | 0.65080700  |
| C                                                  | -4.35088500 | 2.31011100  | 0.88850900  | C                                                   | 4.31915700  | -1.67326800 | 1.82121100  |
| H                                                  | -4.78588400 | 3.31665800  | 0.90748600  | H                                                   | 4.07364700  | -2.70628600 | 1.55194100  |
| H                                                  | -4.90443800 | 1.64796400  | 1.56398800  | H                                                   | 5.30100800  | -1.62637800 | 2.30794500  |
| H                                                  | -3.30300900 | 2.35406000  | 1.18525400  | C                                                   | 3.55608700  | -1.27252200 | 2.48897500  |
| C                                                  | -5.70423700 | 1.76409600  | -1.00505300 | H                                                   | 5.33987700  | -1.22770000 | -0.28592500 |
| H                                                  | -6.35554000 | 1.11703500  | -0.40428800 | H                                                   | 6.32754200  | -1.14684700 | 0.18433400  |
| H                                                  | -6.11968000 | 2.77856400  | -1.03805100 | H                                                   | 5.17122300  | -2.25389900 | -0.63340700 |
| H                                                  | -5.61267700 | 1.36672400  | -2.01675300 | H                                                   | 5.27377900  | -0.53480800 | -1.12625100 |
| C                                                  | -3.31829000 | 0.14265200  | -3.26606300 | C                                                   | 2.71963300  | 1.19205500  | -1.69571200 |
| H                                                  | -2.48722100 | -0.37959200 | -3.76346300 | H                                                   | 1.95326000  | 1.16643900  | -2.48645900 |
| H                                                  | -4.21590000 | -0.46078800 | -3.47237400 | H                                                   | 2.67128000  | 2.18834800  | -1.22853500 |
| H                                                  | -3.44544500 | 1.08990400  | -3.81305900 | H                                                   | 3.68357300  | 1.15409900  | -2.22678800 |
| Structure 1a·CH3MgCl (DME) (d)_II [B3LYP/6-31G(d)] |             |             |             | Structure 1a·CH3MgCl (DME) (d')_II [B3LYP/6-31G(d)] |             |             |             |
| C                                                  | -2.01984400 | 0.52279400  | 0.08995500  | C                                                   | 1.96101300  | -0.43544500 | -0.03928700 |
| C                                                  | -1.54042800 | 0.85296600  | -1.17566000 | C                                                   | 1.26655900  | -0.64269400 | -1.22553400 |
| C                                                  | -2.14359200 | 0.26325700  | -2.32545600 | C                                                   | 1.40126000  | 0.30764500  | -2.27817300 |
| C                                                  | -3.17148800 | -0.63282700 | -2.19789900 | C                                                   | 2.20050000  | 1.41066000  | -2.12778700 |
| C                                                  | -3.65201800 | -1.01503300 | -0.91479600 | C                                                   | 2.90186200  | 1.64826100  | -0.91506100 |
| C                                                  | -3.06035800 | -0.43585000 | 0.25373600  | C                                                   | 2.77345000  | 0.71220700  | 0.16247400  |
| O                                                  | -1.49173600 | 1.11574100  | 1.21668200  | O                                                   | 1.86348800  | -1.35496800 | 1.00826100  |
| C                                                  | -2.22570400 | 2.27297400  | 1.68198500  |                                                     |             |             |             |
| H                                                  | -1.76812000 | 0.53711200  | -3.30423000 |                                                     |             |             |             |
| H                                                  | -3.62422300 | -1.07488900 | -3.08126500 |                                                     |             |             |             |
| H                                                  | -1.68754700 | 2.62621800  | 2.55929700  |                                                     |             |             |             |
| H                                                  | -3.25118000 | 1.98895100  | 1.93744200  |                                                     |             |             |             |
| H                                                  | -2.23627000 | 3.04978600  | 0.90969000  |                                                     |             |             |             |
| Mg                                                 | 0.95237900  | 1.33728900  | 1.42807300  |                                                     |             |             |             |
| Cl                                                 | 3.35428700  | 1.13100400  | 0.53109800  |                                                     |             |             |             |
| C                                                  | 0.87249600  | 2.58328100  | 3.13276000  |                                                     |             |             |             |
| H                                                  | 0.57090500  | 3.62083800  | 2.91423500  |                                                     |             |             |             |
| H                                                  | 0.20794200  | 2.22872000  | 3.93655600  |                                                     |             |             |             |
| H                                                  | 1.87225900  | 2.65727800  | 3.58540000  |                                                     |             |             |             |
| Cl                                                 | 0.83357900  | -1.15186400 | 1.34227000  |                                                     |             |             |             |
| C                                                  | -0.40396700 | 1.78143300  | -1.33273400 |                                                     |             |             |             |
| O                                                  | 0.40187200  | 2.08972600  | -0.45061200 |                                                     |             |             |             |
| C                                                  | -3.50840000 | -0.84485300 | 1.53846500  |                                                     |             |             |             |
| C                                                  | -4.51798000 | -1.77296900 | 1.65902000  |                                                     |             |             |             |
| H                                                  | -4.84764300 | -2.08939000 | 2.64426700  |                                                     |             |             |             |
| C                                                  | -5.12146100 | -2.32987000 | 0.50601700  |                                                     |             |             |             |
| H                                                  | -5.91856300 | -3.05968500 | 0.61715200  |                                                     |             |             |             |
| C                                                  | -4.69474400 | -1.96277100 | -0.75114600 |                                                     |             |             |             |

|                                        |             |             |             |                                         |             |             |             |
|----------------------------------------|-------------|-------------|-------------|-----------------------------------------|-------------|-------------|-------------|
| C                                      | 2.92227100  | -2.34838700 | 1.04076900  | H                                       | -0.60820800 | 4.80086700  | -1.25357800 |
| H                                      | 0.83330900  | 0.15085700  | -3.18643100 | H                                       | 0.51125400  | 3.91800300  | -2.32289000 |
| H                                      | 2.28680200  | 2.13355900  | -2.93389700 | Mg                                      | 2.57603200  | -1.13070900 | 0.15846900  |
| H                                      | 2.71661400  | -2.97457500 | 1.90873400  | O                                       | 3.60889900  | -0.47927800 | -1.55137400 |
| H                                      | 3.88934700  | -1.84954400 | 1.13969200  | C                                       | 4.90812400  | 0.10511900  | -1.34208800 |
| H                                      | 2.89766500  | -2.94978800 | 0.12696800  | H                                       | 5.64151900  | -0.67492700 | -1.10974800 |
| Mg                                     | -0.11121100 | -2.08991700 | 1.53499300  | H                                       | 5.20854800  | 0.65271600  | -2.24240600 |
| Cl                                     | -1.27484600 | -0.04802900 | 1.90114000  | H                                       | 4.81300300  | 0.79551800  | -0.50315200 |
| C                                      | 0.07047300  | -3.71393700 | 2.85775400  | C                                       | 3.58564200  | -1.37994200 | -2.67189100 |
| H                                      | 0.53088400  | -4.60581300 | 2.40549600  | H                                       | 3.88467400  | -0.84110600 | -3.57801500 |
| H                                      | 0.66550800  | -3.47552500 | 3.75268900  | H                                       | 4.25219100  | -2.23024800 | -2.49357600 |
| H                                      | -0.91026600 | -4.04047200 | 3.23348300  | H                                       | 2.55753000  | -1.73127600 | -2.77758400 |
| Cl                                     | -2.45663400 | -0.05838000 | -1.77162800 |                                         |             |             |             |
| C                                      | 0.35714900  | -1.79934400 | -1.40471700 |                                         |             |             |             |
| O                                      | -0.15685800 | -2.44722000 | -0.48024300 | Structure 1a-TS'OMe_II [B3LYP/6-31G(d)] |             |             |             |
| C                                      | 3.43942900  | 0.96973200  | 1.39182600  | C                                       | 1.61530800  | 0.16375100  | 0.15045600  |
| C                                      | 4.21631200  | 2.09605300  | 1.53791900  | C                                       | 2.13277800  | -0.80853000 | -0.76447000 |
| H                                      | 4.71250900  | 2.29142800  | 2.48408400  | C                                       | 3.05160200  | -0.38633600 | -1.77876900 |
| C                                      | 4.36192500  | 3.01274800  | 0.46850800  | C                                       | 3.53138800  | 0.88828000  | -1.83264600 |
| H                                      | 4.97764300  | 3.89778200  | 0.60084000  | C                                       | 3.14660300  | 1.85476500  | -0.84488200 |
| C                                      | 3.71524300  | 2.79578800  | -0.72707600 | C                                       | 2.21665200  | 1.49327800  | 0.17188200  |
| H                                      | 3.80918300  | 3.50654400  | -1.54363500 | O                                       | 1.16709900  | -0.31262900 | 1.42957400  |
| H                                      | 3.30287600  | 0.28474900  | 2.22121800  | C                                       | 2.27156200  | -0.55933800 | 2.34869000  |
| O                                      | 0.14940900  | -2.11202900 | -2.66857800 | H                                       | 3.35959000  | -1.11761800 | -2.51722400 |
| C                                      | -0.88372700 | -3.08936200 | -2.94362500 | H                                       | 4.23157900  | 1.18317500  | -2.60875200 |
| H                                      | -0.86955100 | -3.21148900 | -4.02578400 | H                                       | 1.81974400  | -0.95709000 | 3.25667200  |
| H                                      | -0.65490000 | -4.03067300 | -2.44033100 | H                                       | 2.79759400  | 0.37531200  | 2.55117400  |
| H                                      | -1.84026800 | -2.68772300 | -2.60465300 | H                                       | 2.96118400  | -1.29170500 | 1.91904100  |
| Mg                                     | -2.15182500 | 1.41364800  | 0.03262700  | Mg                                      | -0.25895000 | -1.95397700 | 1.59226600  |
| O                                      | -4.12916400 | 1.46020600  | 0.80984200  | C                                       | -0.47841800 | 0.62995800  | -0.53828500 |
| C                                      | -4.93642100 | 2.61233100  | 0.55333100  | H                                       | -0.15494900 | 1.28268100  | -1.33773900 |
| H                                      | -5.53052000 | 2.47080500  | -0.35858000 | H                                       | -0.52492500 | -0.43627000 | -0.72064700 |
| H                                      | -5.60464600 | 2.79584600  | 1.40387500  | H                                       | -0.64652300 | 1.03177200  | 0.45251700  |
| H                                      | -4.25474500 | 3.45417100  | 0.42671200  | Cl                                      | -2.60478700 | -1.36332200 | 1.11596800  |
| C                                      | -4.89445700 | 0.26372000  | 0.98693500  | C                                       | 0.00316400  | -2.95432800 | 3.42569200  |
| H                                      | -5.59638000 | 0.39479300  | 1.81974800  | H                                       | -0.74515200 | -3.75360200 | 3.53262500  |
| H                                      | -5.43931300 | 0.01826000  | 0.06810800  | H                                       | 0.98490600  | -3.43926300 | 3.53890000  |
| H                                      | -4.18774400 | -0.53220500 | 1.22169000  | H                                       | -0.12620800 | -2.30884600 | 4.30837200  |
| C                                      | -1.40778400 | 3.39179400  | -0.00921800 | Cl                                      | -3.79257500 | -0.10563400 | -2.65824700 |
| H                                      | -1.54093800 | 3.92683500  | 0.94405000  | C                                       | 1.58403300  | -2.13521000 | -0.79826800 |
| H                                      | -0.32783600 | 3.42284600  | -0.21988200 | O                                       | 0.60624100  | -2.54486100 | -0.11624800 |
| H                                      | -1.87899400 | 4.01498100  | -0.78581800 | C                                       | 1.86368100  | 2.44522300  | 1.15209400  |
|                                        |             |             |             | C                                       | 2.41338600  | 3.71559200  | 1.14405900  |
|                                        |             |             |             | H                                       | 2.13121100  | 4.43478100  | 1.90783500  |
| Structure 1a-TS'OMe_I [B3LYP/6-31G(d)] |             |             |             | C                                       | 3.33218600  | 4.07643500  | 0.14042700  |
| C                                      | -1.65923300 | 0.03477900  | 0.11638700  | H                                       | 3.76080400  | 5.07495700  | 0.13122800  |
| C                                      | -1.85510300 | 0.98245700  | -0.93992400 | C                                       | 3.68633600  | 3.16269100  | -0.83449800 |
| C                                      | -2.72800700 | 0.64292200  | -2.02472400 | H                                       | 4.39548200  | 3.43766500  | -1.61144600 |
| C                                      | -3.45356700 | -0.51016500 | -2.03288900 | H                                       | 1.14279500  | 2.16967200  | 1.91600800  |
| C                                      | -3.38565200 | -1.42370400 | -0.92800200 | O                                       | 2.16019500  | -2.97077000 | -1.67471700 |
| C                                      | -2.51896200 | -1.14382300 | 0.16671300  | C                                       | 1.59609600  | -4.28865200 | -1.79019800 |
| O                                      | -1.27567700 | 0.55694900  | 1.39813400  | H                                       | 2.20158400  | -4.78987500 | -2.54543200 |
| C                                      | -2.40813000 | 1.09089500  | 2.14609700  | H                                       | 1.65671900  | -4.81869100 | -0.83651900 |
| H                                      | -2.79819400 | 1.33799800  | -2.85359900 | H                                       | 0.55241900  | -4.23462900 | -2.10934400 |
| H                                      | -4.11332500 | -0.74228600 | -2.86396000 | Mg                                      | -2.71839900 | 0.25803500  | -0.69163300 |
| H                                      | -1.99105400 | 1.50092200  | 3.06517800  | O                                       | -3.84317000 | 1.74845600  | 0.24293800  |
| H                                      | -3.11702500 | 0.29022000  | 2.36369600  | C                                       | -4.81190100 | 2.54038200  | -0.46782200 |
| H                                      | -2.89903200 | 1.88073700  | 1.57014700  | H                                       | -5.79928700 | 2.40932900  | -0.01081900 |
| Mg                                     | 0.41363300  | 1.91172400  | 1.62047500  | H                                       | -4.52174400 | 3.59714400  | -0.43464400 |
| C                                      | 0.35255400  | -0.90762500 | -0.22221600 | H                                       | -4.82606900 | 2.17515500  | -1.49467700 |
| H                                      | 0.00198200  | -1.56625900 | -1.00532900 | C                                       | -3.76476000 | 2.07679100  | 1.63580600  |
| H                                      | 0.67411800  | 0.09433700  | -0.47573500 | H                                       | -3.43336800 | 3.11482100  | 1.75919400  |
| H                                      | 0.27679600  | -1.23044000 | 0.80928000  | H                                       | -4.74569300 | 1.94206500  | 2.10578200  |
| Cl                                     | 2.64655200  | 0.86649500  | 1.52476600  | H                                       | -3.04945000 | 1.39255100  | 2.09287800  |
| C                                      | 0.11201500  | 3.18977900  | 3.26468600  |                                         |             |             |             |
| H                                      | -0.76896100 | 3.84305100  | 3.16889200  | Structure 1a-TS'CO_I [B3LYP/6-31G(d)]   |             |             |             |
| H                                      | 0.00163800  | 2.65939100  | 4.22294400  | O                                       | -0.19654300 | 2.12241800  | 0.76024000  |
| H                                      | 0.97499800  | 3.85931500  | 3.39599100  | Mg                                      | -0.22544500 | 2.08249600  | -1.22275000 |
| Cl                                     | 3.70216600  | -3.02142700 | 0.70596800  | C                                       | -1.27851600 | -0.31524600 | 1.47931300  |
| C                                      | -1.04710700 | 2.16547200  | -1.01086700 | H                                       | -1.29581600 | -0.92530100 | 2.37501500  |
| O                                      | -0.08462200 | 2.45011400  | -0.24824700 | H                                       | -0.63791700 | -0.61938700 | 0.66369700  |
| C                                      | -2.47363700 | -2.04039800 | 1.25599300  | H                                       | -1.95699100 | 0.52302600  | 1.38899000  |
| C                                      | -3.26340200 | -3.17688000 | 1.27726700  | Cl                                      | -1.69091800 | 0.21214500  | -1.89675200 |
| H                                      | -3.21205800 | -3.85704100 | 2.12248300  | C                                       | -0.24627500 | 3.78860800  | -2.45487600 |
| C                                      | -4.12227200 | -3.45556100 | 0.19762100  | H                                       | -1.27139700 | 4.08617500  | -2.72110800 |
| H                                      | -4.73856100 | -4.35037900 | 0.21225000  | H                                       | 0.27363100  | 3.63630100  | -3.41339700 |
| C                                      | -4.17734700 | -2.59503200 | -0.88301500 | H                                       | 0.21329700  | 4.67386400  | -1.98903300 |
| H                                      | -4.83837700 | -2.80762600 | -1.71970400 | Cl                                      | -2.80343500 | -3.49049700 | -0.42983700 |
| H                                      | -1.79763500 | -1.83547700 | 2.08071100  | C                                       | 1.46124500  | 0.40534300  | 1.27835400  |
| O                                      | -1.34352300 | 3.00073300  | -2.02081600 | C                                       | 1.89720900  | -0.53097900 | 2.26149800  |
| C                                      | -0.53555000 | 4.18131700  | -2.15091000 | C                                       | 2.90721900  | -1.41935800 | 2.00828500  |
| H                                      | -0.94282000 | 4.70985400  | -3.01312400 | C                                       | 3.53576500  | -1.46806600 | 0.73348100  |

|                                        |             |             |             |                                             |             |             |             |
|----------------------------------------|-------------|-------------|-------------|---------------------------------------------|-------------|-------------|-------------|
| C                                      | 3.11821600  | -0.54419000 | -0.27612100 | H                                           | 4.29415800  | 3.98795300  | -0.96771600 |
| H                                      | 1.39602400  | -0.52229300 | 3.22205700  | H                                           | 3.79648900  | 4.22182200  | 0.74112700  |
| H                                      | 3.22604900  | -2.11736100 | 2.77791200  | H                                           | 4.86382300  | 2.84572100  | 0.28817600  |
| C                                      | 0.28925300  | 1.29491100  | 1.59808200  |                                             |             |             |             |
| C                                      | 2.10592400  | 0.40872100  | 0.05072500  | Structure 1a·EtMgCl (a)_I [B3LYP/6-31G(d)]  |             |             |             |
| O                                      | 1.79129000  | 1.35598000  | -0.93998900 | C                                           | 0.22114400  | 1.27948400  | -0.35051700 |
| C                                      | 2.71782100  | 2.47759600  | -0.96445700 | C                                           | 1.15962200  | 2.33311600  | -0.14669100 |
| H                                      | 2.39962700  | 3.11659200  | -1.78829700 | C                                           | 2.49350700  | 2.06546300  | 0.01480300  |
| H                                      | 2.66002100  | 3.02286200  | -0.01796900 | C                                           | 2.97840800  | 0.72945200  | 0.00050400  |
| H                                      | 3.73264400  | 2.10869500  | -1.12893600 | C                                           | 2.05450400  | -0.34653300 | -0.20264100 |
| C                                      | 3.71423700  | -0.61688800 | -1.56374500 | C                                           | -1.22141200 | 1.59334100  | -0.46559900 |
| C                                      | 4.69282400  | -1.54997300 | -1.83006100 | O                                           | -2.14430000 | 0.79203200  | -0.29405100 |
| H                                      | 5.13171700  | -1.60223900 | -2.82244800 | O                                           | -0.19584800 | -1.08187400 | -0.64646100 |
| C                                      | 5.12226400  | -2.44900200 | -0.82654100 | Cl                                          | -3.30845200 | -2.54774800 | -0.63899800 |
| H                                      | 5.89592900  | -3.17780100 | -1.05086600 | C                                           | -0.28207900 | -1.47633500 | -2.04691700 |
| C                                      | 4.55056300  | -2.40970500 | 0.42604700  | H                                           | 0.79327500  | 3.35196300  | -0.11358400 |
| H                                      | 4.86332200  | -3.10800400 | 1.19826400  | H                                           | 3.19753300  | 2.87794500  | 0.17162500  |
| H                                      | 3.36995300  | 0.05143100  | -2.34542200 | H                                           | -1.04059600 | -2.25728600 | -2.08200600 |
| O                                      | 0.28417600  | 1.61625200  | 2.91869200  | H                                           | 0.69231300  | -1.84146400 | -2.38145400 |
| C                                      | -0.74917100 | 2.50132500  | 3.34866000  | H                                           | -0.59513500 | -0.62011100 | -2.65157100 |
| H                                      | -0.56332200 | 2.67678300  | 4.40927600  | Mg                                          | -2.02276800 | -1.11091100 | 0.60917200  |
| H                                      | -0.72015900 | 3.44174000  | 2.79337600  | C                                           | -1.47985100 | -0.89135800 | 2.65451700  |
| H                                      | -1.72978900 | 2.02864500  | 3.21600400  | H                                           | -0.51354400 | -1.39343400 | 2.83252400  |
| Mg                                     | -2.57847400 | -1.24907900 | -0.15051200 | H                                           | -2.19800600 | -1.47005900 | 3.25769900  |
| O                                      | -4.54870700 | -0.55109000 | -0.07718000 | O                                           | 0.68099100  | -0.03832000 | -0.40035700 |
| C                                      | -5.66155600 | -1.43540900 | 0.14757400  | C                                           | 2.52971700  | -1.68609100 | -0.18284300 |
| H                                      | -6.19892900 | -1.12994800 | 1.05316300  | C                                           | 3.86745100  | -1.94544700 | 0.01119000  |
| H                                      | -6.33600600 | -1.40354600 | -0.71557500 | H                                           | 4.22137400  | -2.97190700 | 0.03453500  |
| H                                      | -5.25106200 | -2.43886800 | 0.25940700  | C                                           | 4.78617500  | -0.88344500 | 0.19228200  |
| C                                      | -4.95259600 | 0.80182200  | -0.32471800 | H                                           | 5.83896900  | -1.10478700 | 0.34276400  |
| H                                      | -5.61598900 | 0.83894100  | -1.19626800 | C                                           | 4.35044700  | 0.42275900  | 0.19117200  |
| H                                      | -5.47008900 | 1.20564600  | 0.55370500  | H                                           | 5.05147000  | 1.23917300  | 0.34352700  |
| H                                      | -4.05199600 | 1.37951200  | -0.53348900 | H                                           | 1.82085700  | -2.49862800 | -0.29621800 |
|                                        |             |             |             | O                                           | -1.46080000 | 2.86876900  | -0.76267900 |
| Structure 1a-TS'CO_II [B3LYP/6-31G(d)] |             |             |             | C                                           | -2.84905200 | 3.26736300  | -0.81910800 |
| O                                      | 0.13649100  | -2.37814800 | 0.43778900  | H                                           | -2.82781300 | 4.32930100  | -1.06044600 |
| Mg                                     | 0.18227800  | -2.05500800 | -1.51846200 | H                                           | -3.37187800 | 2.70122300  | -1.59261600 |
| C                                      | 1.43211300  | -0.19419800 | 1.52116800  | H                                           | -3.32866800 | 3.09548800  | 0.14679300  |
| H                                      | 1.48297400  | 0.30357800  | 2.48288100  | C                                           | -1.40140300 | 0.53654700  | 3.23012700  |
| H                                      | 0.86575400  | 0.26607100  | 0.72560700  | H                                           | -0.66098000 | 1.15619400  | 2.70183000  |
| H                                      | 2.01646700  | -1.09333600 | 1.36695100  | H                                           | -2.36349800 | 1.06290000  | 3.14931300  |
| Cl                                     | 1.71522700  | -0.15778100 | -1.91385600 | H                                           | -1.12018700 | 0.56782300  | 4.29619000  |
| C                                      | 0.00236700  | -3.51857400 | -3.01766800 |                                             |             |             |             |
| H                                      | 0.98768200  | -3.83770900 | -3.38689900 | Structure 1a·EtMgCl (a)_II [B3LYP/6-31G(d)] |             |             |             |
| H                                      | -0.54624300 | -3.16597500 | -3.90502200 | C                                           | 0.20945200  | 1.46816600  | -0.00781200 |
| H                                      | -0.50584300 | -4.43482500 | -2.68022400 | C                                           | 1.18798900  | 2.42065100  | 0.40076600  |
| Cl                                     | 5.21539400  | 0.11792300  | 0.28868000  | C                                           | 2.51681400  | 2.08936900  | 0.44314200  |
| C                                      | -1.35970700 | -0.62244500 | 1.23326500  | C                                           | 2.95647400  | 0.78292600  | 0.09634500  |
| C                                      | -1.70861700 | 0.19158300  | 2.35101400  | C                                           | 1.99173200  | -0.19028500 | -0.32183400 |
| C                                      | -2.63953500 | 1.19011300  | 2.24966200  | C                                           | -1.22565700 | 1.83083200  | 0.02101900  |
| C                                      | -3.27057800 | 1.47798300  | 1.00752800  | O                                           | -2.16467500 | 1.03146200  | 0.06734300  |
| C                                      | -2.93999800 | 0.68013600  | -0.13341600 | O                                           | -0.29430900 | -0.74170300 | -0.84252700 |
| H                                      | -1.20753800 | -0.00552100 | 3.29136700  | Cl                                          | -3.46393600 | -2.06165200 | -1.06928700 |
| H                                      | -2.89623600 | 1.78819000  | 3.12027100  | C                                           | -0.44129200 | -0.78418900 | -2.29188400 |
| C                                      | -0.27636400 | -1.65471800 | 1.40042500  | H                                           | 0.85703700  | 3.41158200  | 0.68718000  |
| C                                      | -2.00935800 | -0.39184300 | 0.03027000  | H                                           | 3.25192600  | 2.82408000  | 0.75967700  |
| O                                      | -1.78394800 | -1.20290200 | -1.09394000 | H                                           | -1.21984100 | -1.52136100 | -2.48377200 |
| C                                      | -2.78731700 | -2.24550000 | -1.24843700 | H                                           | 0.51092000  | -1.07193500 | -2.74487700 |
| H                                      | -2.53764400 | -2.77094800 | -2.16998000 | H                                           | -0.75567900 | 0.19755600  | -2.65785600 |
| H                                      | -2.73888300 | -2.93068600 | -0.39723900 | Mg                                          | -2.06844900 | -1.04568900 | 0.44763500  |
| H                                      | -3.77865800 | -1.79120700 | -1.31533700 | C                                           | -1.41675000 | -1.37625500 | 2.44311100  |
| C                                      | -3.54065300 | 0.98589300  | -1.38408000 | O                                           | 0.62420700  | 0.19450200  | -0.38743800 |
| C                                      | -4.44193800 | 2.02304800  | -1.49330600 | C                                           | 2.42174100  | -1.50837600 | -0.63579800 |
| H                                      | -4.88816700 | 2.25026400  | -2.45744100 | C                                           | 3.75477300  | -1.84119100 | -0.55468800 |
| C                                      | -4.78534100 | 2.79932800  | -0.36223900 | H                                           | 4.07434800  | -2.85321300 | -0.78503000 |
| H                                      | -5.50090800 | 3.61063000  | -0.46200400 | C                                           | 4.71336300  | -0.87635100 | -0.16093400 |
| C                                      | -4.20670900 | 2.53307400  | 0.85949800  | H                                           | 5.76184500  | -1.15457100 | -0.10360400 |
| H                                      | -4.45731700 | 3.13249200  | 1.73129100  | C                                           | 4.32222700  | 0.40420400  | 0.16050400  |
| H                                      | -3.26324900 | 0.40762700  | -2.25863000 | H                                           | 5.05453500  | 1.14267600  | 0.47602800  |
| O                                      | -0.30734100 | -2.17597400 | 2.65342100  | H                                           | 1.68281900  | -2.25232000 | -0.91139500 |
| C                                      | 0.63765700  | -3.21200200 | 2.93196800  | O                                           | -1.43700700 | 3.14546600  | 0.01871000  |
| H                                      | 0.42545200  | -3.53419300 | 3.95226600  | C                                           | -2.81319500 | 3.57718300  | 0.11589700  |
| H                                      | 0.52539800  | -4.04486100 | 2.23434100  | H                                           | -2.76881100 | 4.66542200  | 0.10275200  |
| H                                      | 1.65890400  | -2.81868500 | 2.87012100  | H                                           | -3.38680300 | 3.19903600  | -0.73268000 |
| Mg                                     | 3.00099600  | 0.55143100  | 0.04216300  | H                                           | -3.25627700 | 3.21525300  | 1.04612700  |
| O                                      | 2.90670900  | 2.61761400  | -0.24315600 | H                                           | -0.83920600 | -0.50770300 | 2.80496200  |
| C                                      | 1.75353500  | 3.31266000  | -0.73377200 | H                                           | -2.30139900 | -1.40698500 | 3.10072200  |
| H                                      | 1.41754000  | 4.05040500  | 0.00450600  | C                                           | -0.58627400 | -2.65283200 | 2.68869300  |
| H                                      | 1.99429000  | 3.81385000  | -1.67827900 | H                                           | -0.29195900 | -2.79131500 | 3.74277700  |
| H                                      | 0.97388100  | 2.57086000  | -0.90810700 | H                                           | -1.13682700 | -3.55782800 | 2.39760000  |
| C                                      | 4.03756500  | 3.48117100  | -0.03043600 | H                                           | 0.34597600  | -2.65394400 | 2.10490500  |

|                                         |             |             |             |                                       |              |             |             |
|-----------------------------------------|-------------|-------------|-------------|---------------------------------------|--------------|-------------|-------------|
| Structure 1a-TSOMe-I [B3LYP/6-31G(d)]   |             |             |             | C                                     | 0.68781300   | 2.19776500  | 0.34538400  |
| C                                       | -0.05148200 | 1.30630400  | -0.09725600 | C                                     | 2.03734400   | 2.06108100  | 0.46296200  |
| C                                       | 0.86305300  | 2.40284700  | 0.01149700  | C                                     | 2.66256300   | 0.79068300  | 0.22698300  |
| C                                       | 2.21009000  | 2.21217400  | 0.08427900  | C                                     | 1.86479400   | -0.33925600 | -0.11436000 |
| C                                       | 2.75968400  | 0.88786200  | 0.03621200  | C                                     | -1.58478300  | 1.24518200  | -0.00618700 |
| C                                       | 1.89060700  | -0.23730800 | -0.07833700 | O                                     | -2.41046100  | 0.29070900  | -0.06745800 |
| C                                       | -1.46645100 | 1.53255800  | -0.04137500 | O                                     | -0.20855100  | -1.10651600 | -1.11943800 |
| O                                       | -2.33279700 | 0.62815000  | 0.12330500  | Cl                                    | -3.14641300  | -3.34289500 | -0.36218600 |
| O                                       | -0.27336200 | -1.03533400 | -0.84427400 | C                                     | -0.06932300  | -0.71513400 | -2.50407500 |
| Cl                                      | -3.24114800 | -2.96831500 | 0.38539900  | H                                     | 0.21578800   | 3.15915500  | 0.51559100  |
| C                                       | -0.21327400 | -0.87947800 | -2.28012700 | H                                     | 2.66100600   | 2.91284300  | 0.71820300  |
| H                                       | 0.44757500  | 3.40396300  | 0.04565900  | H                                     | -0.55664400  | -1.49990400 | -3.08471300 |
| H                                       | 2.88662700  | 3.05803500  | 0.16436800  | H                                     | 0.99093000   | -0.65684900 | -2.76161200 |
| H                                       | -0.78347400 | -1.71353100 | -2.69189300 | H                                     | -0.55332200  | 0.24920500  | -2.68211300 |
| H                                       | 0.82735200  | -0.93205500 | -2.60927400 | Mg                                    | -1.79445700  | -1.59663400 | 0.01479700  |
| H                                       | -0.65598800 | 0.07339100  | -2.58307300 | C                                     | -0.23861300  | -1.45072400 | 1.67075900  |
| Mg                                      | -1.79587200 | -1.25678300 | 0.45566600  | C                                     | 0.41021100   | -0.21563900 | -0.15373900 |
| C                                       | -0.10981700 | -0.96288000 | 1.95758300  | C                                     | 2.49563600   | -1.57083500 | -0.39522100 |
| H                                       | 0.76883700  | -1.60808400 | 1.91470800  | C                                     | 3.87323700   | -1.69511700 | -0.33789800 |
| H                                       | -0.91375800 | -1.60464100 | 2.39370800  | H                                     | 4.34165100   | -2.65108400 | -0.55375200 |
| C                                       | 0.44711500  | -0.03877700 | -0.07628700 | C                                     | 4.66371400   | -0.58365800 | 0.00913200  |
| C                                       | 2.44737000  | -1.53112900 | -0.19155100 | H                                     | 5.74483700   | -0.68185700 | 0.05923600  |
| C                                       | 3.81799000  | -1.72028900 | -0.18039200 | C                                     | 4.06698200   | 0.63242200  | 0.28628700  |
| H                                       | 4.22866200  | -2.72228000 | -0.26487000 | H                                     | 4.67603500   | 1.49399000  | 0.54899300  |
| C                                       | 4.67805100  | -0.61305200 | -0.05097000 | O                                     | 1.88119000   | -2.42878600 | -0.64965700 |
| H                                       | 5.75441300  | -0.76209600 | -0.03663700 | H                                     | -2.04245300  | 2.50170900  | 0.08203100  |
| C                                       | 4.15651200  | 0.66257600  | 0.05503000  | C                                     | -3.46921000  | 2.67328100  | 0.13141600  |
| H                                       | 4.81944800  | 1.51960200  | 0.14579300  | H                                     | -3.62319400  | 3.75074100  | 0.19167300  |
| H                                       | 1.78011600  | -2.38235300 | -0.28226200 | H                                     | -3.93779500  | 2.26795800  | -0.76866400 |
| O                                       | -1.86312500 | 2.80852700  | -0.14177400 | H                                     | -3.88766000  | 2.17672000  | 1.01037500  |
| C                                       | -3.27333100 | 3.06374500  | -0.02344300 | H                                     | 0.82321800   | -1.65806600 | 1.77879100  |
| H                                       | -3.37778000 | 4.14159600  | -0.14812300 | C                                     | -0.76022300  | -0.52417800 | 2.76058100  |
| H                                       | -3.82799500 | 2.53126700  | -0.79977200 | H                                     | -0.49705000  | 0.52166600  | 2.55043800  |
| H                                       | -3.64056500 | 2.75437300  | 0.95832800  | H                                     | -1.85255500  | -0.56682800 | 2.86192500  |
| C                                       | 0.08393100  | 0.24382200  | 2.85956300  | H                                     | -0.33896600  | -0.76211400 | 3.74777300  |
| H                                       | 0.12474900  | -0.03096600 | 3.92339500  | H                                     | -0.72049700  | -2.45216500 | 1.74249700  |
| H                                       | 1.01412600  | 0.77019800  | 2.62267700  | Structure 1a-TSCO_I [B3LYP/6-31G(d)]  |              |             |             |
| H                                       | -0.73257800 | 0.97166200  | 2.75127100  | C                                     | 0.05722200   | 1.15526700  | -0.22975600 |
| Structure 1a-TSOMe-II [B3LYP/6-31G(d)]  |             |             |             | C                                     | 0.89400700   | 2.30282800  | -0.18099200 |
| C                                       | -0.01083300 | 1.30599600  | -0.14508100 | C                                     | 2.26050500   | 2.18433500  | -0.10782100 |
| C                                       | 0.87094600  | 2.41559200  | 0.05463600  | C                                     | 2.88186400   | 0.91150100  | -0.02930500 |
| C                                       | 2.22145500  | 2.25594100  | 0.15079700  | C                                     | 2.06108800   | -0.26354400 | -0.05136100 |
| C                                       | 2.81417600  | 0.95829400  | -0.00534700 | C                                     | -1.44331400  | 1.29507700  | -0.28914600 |
| C                                       | 1.97919700  | -0.18077100 | -0.20541900 | O                                     | -2.14926300  | 0.50236700  | -1.02731200 |
| C                                       | -1.42999300 | 1.48807800  | -0.09304400 | O                                     | -0.14219800  | -1.25032100 | -0.23860700 |
| O                                       | -2.26971500 | 0.55473300  | 0.05648900  | Cl                                    | -3.29725300  | -2.81790300 | 0.54538900  |
| O                                       | -0.18279700 | -1.04411100 | -0.88279600 | C                                     | -0.15303500  | -1.92874200 | -1.53227800 |
| Cl                                      | -3.00207500 | -3.04980900 | 0.62288000  | H                                     | 0.42594500   | 3.27868500  | -0.21560500 |
| C                                       | -0.22902400 | -0.86868800 | -2.31752300 | H                                     | 2.88376300   | 3.07461100  | -0.09026900 |
| H                                       | 0.42791200  | 3.40134600  | 0.14510100  | H                                     | -0.74803800  | -2.83221500 | -1.38846500 |
| H                                       | 2.87042700  | 3.11256400  | 0.30760100  | H                                     | 0.86821800   | -2.18459500 | -1.81873100 |
| H                                       | -0.76474400 | -1.73735400 | -2.70313000 | H                                     | -0.61344300  | -1.27437700 | -2.27648700 |
| H                                       | 0.78846800  | -0.84296600 | -2.71489000 | Mg                                    | -2.15125600  | -0.90356100 | 0.33846900  |
| H                                       | -0.75804700 | 0.05240000  | -2.57586500 | C                                     | -1.92339800  | 0.73322300  | 1.85956600  |
| Mg                                      | -1.63079800 | -1.28115300 | 0.50513700  | H                                     | -0.241737200 | -0.24363500 | 2.39282100  |
| C                                       | 0.06018800  | -0.84351000 | 1.95102900  | H                                     | -2.93079500  | 1.17193600  | 1.88205000  |
| H                                       | -0.87048000 | -0.61724800 | 2.51895900  | C                                     | 0.65808300   | -0.09405900 | -0.20376000 |
| C                                       | 0.53256000  | -0.02398700 | -0.15055000 | C                                     | 2.67620900   | -1.53699100 | 0.10419400  |
| C                                       | 2.57243500  | -1.43950800 | -0.44654300 | C                                     | 4.04230700   | -1.64118800 | 0.23695100  |
| C                                       | 3.94998300  | -1.58352000 | -0.47306100 | H                                     | 4.49864700   | -2.61875800 | 0.36465500  |
| H                                       | 4.39024500  | -2.55843700 | -0.66125700 | C                                     | 4.85889900   | -0.48412800 | 0.22089200  |
| C                                       | 4.77556900  | -0.46709000 | -0.24853200 | H                                     | 5.93592500   | -0.58434200 | 0.32098600  |
| H                                       | 5.85622100  | -0.58136300 | -0.26185800 | C                                     | 4.28867200   | 0.76193000  | 0.09752900  |
| C                                       | 4.21617000  | 0.77743800  | -0.02048800 | H                                     | 4.90716500   | 1.65592700  | 0.10581300  |
| H                                       | 4.85396400  | 1.64393800  | 0.13612300  | H                                     | 2.05494400   | -2.42481400 | 0.14921600  |
| H                                       | 1.93150300  | -2.29827500 | -0.61501400 | O                                     | -1.81342500  | 2.59468300  | -0.18250700 |
| O                                       | -1.86441400 | 2.75342200  | -0.18056100 | C                                     | -3.16932500  | 2.89918100  | -0.53370200 |
| C                                       | -3.28071700 | 2.96587400  | -0.05348800 | H                                     | -3.26628800  | 3.97663300  | -0.39425600 |
| H                                       | -3.41659500 | 4.04229000  | -0.15930100 | H                                     | -3.37171300  | 2.62372500  | -1.57076900 |
| H                                       | -3.82278300 | 2.43149200  | -0.83735900 | H                                     | -3.86891000  | 2.37288100  | 0.12262000  |
| H                                       | -3.63624800 | 2.62924000  | 0.92367900  | C                                     | -0.94647100  | 1.57863400  | 2.66733500  |
| C                                       | 0.61331800  | -2.21359800 | 2.33888500  | H                                     | -0.84993700  | 2.58055700  | 2.23476500  |
| H                                       | -0.08759300 | -3.03267700 | 2.13029900  | H                                     | -1.26726200  | 1.70580400  | 3.71112000  |
| H                                       | 1.54210200  | -2.42774300 | 1.79792300  | H                                     | 0.05404100   | 1.13026100  | 2.68910500  |
| H                                       | 0.85412300  | -2.26856200 | 3.41207500  | Structure 1a-TSCO_II [B3LYP/6-31G(d)] |              |             |             |
| H                                       | 0.74082600  | -0.04191100 | 2.23378600  | C                                     | 0.18513400   | 1.17327100  | -0.26708600 |
| Structure 1a-TSOMe-III [B3LYP/6-31G(d)] |             |             |             | C                                     | 1.06236700   | 2.27068300  | -0.05213400 |
| C                                       | -0.15942900 | 1.09161200  | 0.00762400  | C                                     | 2.41639000   | 2.08204700  | 0.07720700  |
|                                         |             |             |             | C                                     | 2.98250300   | 0.78067700  | 0.04726600  |



|    |             |             |             |    |             |             |             |
|----|-------------|-------------|-------------|----|-------------|-------------|-------------|
| C  | 2.11793800  | -0.34774600 | -0.13572700 | O  | -0.37410000 | -1.11980000 | -0.62808400 |
| C  | -1.30442800 | 1.38137900  | -0.38081800 | Cl | -3.75522200 | -2.72162200 | -0.16656900 |
| O  | -2.00725000 | 0.67152700  | -1.20931000 | C  | -0.06443300 | -1.03845600 | -2.03163500 |
| O  | -0.11668900 | -1.20936200 | -0.50537200 | H  | 0.58564200  | 3.29896300  | -0.57168800 |
| Cl | -3.39383000 | -2.65900300 | 0.15950300  | H  | 2.97646600  | 2.80294200  | -0.78664600 |
| C  | -0.11876000 | -1.75047000 | -1.86076600 | H  | -0.72876000 | -1.73814600 | -2.54677000 |
| H  | 0.63563700  | 3.26503400  | -0.00646100 | H  | 0.97320900  | -1.33433900 | -2.20013100 |
| H  | 3.07352300  | 2.93608300  | 0.21976600  | H  | -0.22148700 | -0.01901400 | -2.40100000 |
| H  | -0.74686800 | -2.64250000 | -1.82401600 | Mg | -2.29017300 | -1.05875700 | -0.08263000 |
| H  | 0.90000900  | -2.01423700 | -2.14955400 | C  | -0.02576400 | -0.59149200 | 1.70064000  |
| H  | -0.53761500 | -1.00697600 | -2.54298000 | H  | 0.16171000  | -1.66766500 | 1.78541300  |
| Mg | -2.13499600 | -0.81027200 | 0.05506700  | H  | -1.10503700 | -0.42825500 | 1.84602200  |
| C  | -1.80102000 | 0.70771100  | 1.67881200  | C  | 0.40853400  | -0.10209100 | 0.29243800  |
| H  | -2.89389800 | 0.62828600  | 1.84384800  | C  | 2.38968400  | -1.66305200 | 0.21838000  |
| C  | 0.73109100  | -0.09951400 | -0.33072000 | C  | 3.73890900  | -1.94818500 | 0.03029100  |
| C  | 2.67333100  | -1.65630000 | -0.08837700 | H  | 4.10222900  | -2.96448600 | 0.15252400  |
| C  | 4.02631200  | -1.83484100 | 0.09388700  | C  | 4.61817200  | -0.98152600 | -0.31741100 |
| H  | 4.43652900  | -2.83992000 | 0.13621600  | H  | 5.67510700  | -1.12362300 | -0.46247100 |
| C  | 4.88776900  | -0.72048300 | 0.23825500  | C  | 4.13769700  | 0.37517200  | -0.48501600 |
| H  | 5.95366100  | -0.87835100 | 0.37605900  | H  | 4.81650300  | 1.17701700  | -0.76608200 |
| C  | 4.37383200  | 0.55604700  | 0.22152400  | H  | 1.70870900  | -2.47131300 | 0.46960400  |
| H  | 5.02629000  | 1.41578900  | 0.35224400  | O  | -1.69445700 | 2.95030500  | -0.14900800 |
| H  | 2.01592800  | -2.51525500 | -0.16772800 | C  | -3.08098100 | 3.30044000  | -0.20987500 |
| O  | -1.62153800 | 2.69568400  | -0.23135000 | H  | -3.09431900 | 4.38154600  | -0.35586900 |
| C  | -2.96799700 | 3.05950300  | -0.55511700 | H  | -3.57940400 | 2.80267200  | -1.04716900 |
| H  | -3.02278500 | 4.13661400  | -0.39049400 | H  | -3.59575700 | 3.03885600  | 0.71831900  |
| H  | -3.19963100 | 2.81653600  | -1.59409100 | C  | 0.68685300  | 0.15058000  | 2.83765500  |
| H  | -3.67662600 | 2.54660000  | 0.10350500  | H  | 0.32200300  | -0.20588500 | 3.80657700  |
| C  | -1.03988100 | -0.30198200 | 2.55786700  | H  | 1.76724300  | -0.01533400 | 2.79669100  |
| H  | -1.36420600 | -1.34567400 | 2.41984900  | H  | 0.50293100  | 1.22743900  | 2.77588200  |
| H  | 0.03824700  | -0.26903900 | 2.35882500  |    |             |             |             |
| H  | -1.17461200 | -0.09098500 | 3.62890100  |    |             |             |             |
| H  | -1.53209600 | 1.72162600  | 1.96758500  |    |             |             |             |

Structure 1a-TSCO\_III [B3LYP/6-31G(d)]

|    |             |             |             |
|----|-------------|-------------|-------------|
| C  | -0.25178000 | -1.10369700 | -0.29615100 |
| C  | -1.07379100 | -2.24954100 | -0.12006000 |
| C  | -2.42905800 | -2.12919200 | 0.06699700  |
| C  | -3.04940000 | -0.85467200 | 0.13599400  |
| C  | -2.24018000 | 0.31927900  | -0.01063400 |
| C  | 1.24185600  | -1.24365700 | -0.46865300 |
| O  | 1.88890000  | -0.46547300 | -1.27390100 |
| O  | -0.06187400 | 1.29955400  | -0.41070600 |
| Cl | 3.13476900  | 2.87503600  | 0.20595700  |
| C  | -0.13649700 | 1.91905800  | -1.72967300 |
| H  | -0.60374100 | -3.22486200 | -0.14700600 |
| H  | -3.04372800 | -3.01841200 | 0.18063200  |
| H  | 0.46093500  | 2.83009900  | -1.66392200 |
| H  | -1.17528600 | 2.16002700  | -1.96178700 |
| H  | 0.27979000  | 1.23407800  | -2.47220200 |
| Mg | 1.98073900  | 0.95933400  | 0.07444500  |
| C  | 1.70894500  | -0.60574100 | 1.64930800  |
| C  | -0.85328100 | 0.14519200  | -0.26966100 |
| C  | -2.84746000 | 1.59739900  | 0.13369800  |
| C  | -4.19881400 | 1.70555200  | 0.37343600  |
| H  | -4.64885000 | 2.68744700  | 0.48999600  |
| C  | -5.00706300 | 0.54784900  | 0.48156800  |
| H  | -6.07271800 | 0.65078700  | 0.66551300  |
| C  | -4.44148500 | -0.70186100 | 0.37188100  |
| H  | -5.05211300 | -1.59546700 | 0.47431400  |
| H  | -2.22986500 | 2.48744200  | 0.08251200  |
| O  | 1.62858600  | -2.54061400 | -0.36758900 |
| C  | 2.89172600  | -2.87687500 | -0.95967200 |
| H  | 3.03443500  | -3.93600800 | -0.74034200 |
| H  | 2.86838500  | -2.70923800 | -2.03918100 |
| H  | 3.70341200  | -2.28966700 | -0.52445600 |
| H  | 1.07295500  | -1.43458400 | 1.95740000  |
| C  | 3.15414600  | -0.83000200 | 2.11433100  |
| H  | 3.23448700  | -0.89012800 | 3.21004500  |
| H  | 3.54849400  | -1.77087000 | 1.71474900  |
| H  | 3.84443100  | -0.03111700 | 1.80341400  |
| H  | 1.26696500  | 0.28056100  | 2.15704600  |

Structure 1a-intOme-I [B3LYP/6-31G(d)]

|   |             |             |             |
|---|-------------|-------------|-------------|
| C | -0.02852900 | 1.30211500  | -0.02978600 |
| C | 0.94931000  | 2.29388900  | -0.38670300 |
| C | 2.27295400  | 2.02351600  | -0.50909900 |
| C | 2.77147900  | 0.68268000  | -0.30792800 |
| C | 1.88692100  | -0.36176000 | 0.06156700  |
| C | -1.38673400 | 1.64426600  | 0.02105500  |
| O | -2.38026400 | 0.83163700  | 0.18991500  |

Structure 1a-intCO-I [B3LYP/6-31G(d)]

|    |             |             |             |
|----|-------------|-------------|-------------|
| C  | -0.17696600 | 1.08778000  | 0.08076800  |
| C  | -1.11962200 | 2.13960200  | 0.22832800  |
| C  | -2.47515600 | 1.90898300  | 0.25517600  |
| C  | -2.99129500 | 0.60328700  | 0.07250500  |
| C  | -2.07253600 | -0.48604900 | -0.08092600 |
| C  | 1.32578700  | 1.36904300  | -0.15410600 |
| O  | 1.75281200  | 0.78597300  | -1.28342500 |
| O  | 0.20544900  | -1.30968800 | -0.01534300 |
| Cl | 3.44496400  | -2.78661600 | -0.51086900 |
| C  | 0.17239200  | -2.13014000 | 1.18735300  |
| H  | -0.75787400 | 3.15624900  | 0.32486700  |
| H  | -3.16740300 | 2.73672600  | 0.38581700  |
| H  | 0.88864000  | -2.93592600 | 1.01751200  |
| H  | -0.82725100 | -2.53628100 | 1.34299500  |
| H  | 0.46894200  | -1.53049600 | 2.05223900  |
| Mg | 2.23317700  | -0.90092000 | -0.51214900 |
| C  | 1.78850900  | 2.82950000  | -0.02510300 |
| H  | 1.36029000  | 3.30678300  | 0.86545000  |
| H  | 2.87159900  | 2.77679200  | 0.13268300  |
| C  | -0.67934300 | -0.20701300 | 0.01066600  |
| C  | -2.59269400 | -1.78199200 | -0.36409300 |
| C  | -3.95077000 | -1.99257800 | -0.43500200 |
| H  | -4.32976800 | -2.98402500 | -0.66680400 |
| C  | -4.85974100 | -0.92591100 | -0.22953400 |
| H  | -5.92884500 | -1.11092700 | -0.28250800 |
| H  | -4.38706000 | 0.34291200  | 0.01009000  |
| C  | -5.07577000 | 1.17406000  | 0.14007300  |
| H  | -1.90742900 | -2.59768100 | -0.56346400 |
| O  | 2.08940500  | 0.56159100  | 0.95051700  |
| C  | 1.93569200  | 0.89255400  | 2.32356600  |
| H  | 2.44725900  | 0.12178500  | 2.90651700  |
| H  | 2.39405400  | 1.86288100  | 2.54630500  |
| H  | 0.87640200  | 0.92157000  | 2.61158100  |
| C  | 1.51417700  | 3.66514600  | -1.28155400 |
| H  | 0.44424900  | 3.77667400  | -1.48669800 |
| H  | 1.94123200  | 4.66802300  | -1.17050400 |
| H  | 1.96959300  | 3.18354800  | -2.14990500 |

Structure 1a-intCO-II [B3LYP/6-31G(d)]

|    |             |             |             |
|----|-------------|-------------|-------------|
| C  | -0.20429300 | 1.08345900  | -0.17983500 |
| C  | -1.12029400 | 2.14312300  | -0.43086800 |
| C  | -2.48207700 | 1.96203700  | -0.39973900 |
| C  | -3.04326000 | 0.68261700  | -0.16949000 |
| C  | -2.15791600 | -0.42350300 | 0.03372900  |
| C  | 1.31726200  | 1.29212700  | -0.41650900 |
| O  | 1.70428000  | 0.61998800  | -1.52259100 |
| O  | 0.08340100  | -1.28297900 | 0.26595100  |
| Cl | 3.18114000  | -2.93354900 | -0.49753100 |
| C  | 0.18386500  | -1.71840200 | 1.65363400  |

|                                         |             |             |             |                                        |             |             |             |
|-----------------------------------------|-------------|-------------|-------------|----------------------------------------|-------------|-------------|-------------|
| H                                       | -0.73589500 | 3.12726200  | -0.66543500 | H                                      | -1.09139600 | -1.28184400 | 2.18343300  |
| H                                       | -3.14563000 | 2.80353600  | -0.58171900 | H                                      | -0.01827500 | 0.12972600  | 2.37002600  |
| H                                       | 0.82707700  | -2.60011200 | 1.64376800  | Mg                                     | 2.24982200  | -0.93652500 | 0.26573000  |
| H                                       | -0.80819000 | -1.97474300 | 2.02811200  | C                                      | 0.03471500  | -0.55418600 | -1.78514900 |
| H                                       | 0.62861800  | -0.91771600 | 2.24766100  | H                                      | 1.04598400  | -0.15837600 | -1.93203000 |
| Mg                                      | 1.94857100  | -1.06891000 | -0.63327700 | C                                      | -0.51394500 | 0.01039900  | -0.45082200 |
| C                                       | 1.77427200  | 2.75967500  | -0.42039600 | C                                      | -2.46794500 | -1.56901500 | -0.20877000 |
| H                                       | 2.84278000  | 2.74411400  | -0.65627500 | C                                      | -3.81145200 | -1.83444400 | 0.01852600  |
| H                                       | 1.30618800  | 3.23200000  | -1.29125400 | H                                      | -4.17295400 | -2.85845400 | -0.00840000 |
| C                                       | -0.75761000 | -0.16636200 | 0.06082000  | C                                      | -4.69217700 | -0.77836600 | 0.29512700  |
| C                                       | -2.71291700 | -1.72753900 | 0.16364300  | H                                      | -5.74704200 | -0.97646900 | 0.46661100  |
| C                                       | -4.07684200 | -1.91400400 | 0.14212500  | C                                      | -4.20773300 | 0.51565200  | 0.37405900  |
| H                                       | -4.48434200 | -2.91693100 | 0.23417400  | H                                      | -4.87815600 | 1.33618900  | 0.61862100  |
| C                                       | -4.95433100 | -0.81346500 | -0.01264900 | H                                      | -1.78950300 | -2.39691300 | -0.36718600 |
| H                                       | -6.02817800 | -0.97728800 | -0.02122000 | O                                      | 1.59466500  | 3.04208000  | -0.18826300 |
| C                                       | -4.44530600 | 0.45418700  | -0.17375500 | C                                      | 2.97815500  | 3.41575100  | -0.11446700 |
| H                                       | -5.10938300 | 1.30260600  | -0.31951400 | H                                      | 2.97476400  | 4.50557800  | -0.07656600 |
| H                                       | -2.05101800 | -2.58225300 | 0.24718200  | H                                      | 3.44741500  | 3.00696500  | 0.78481300  |
| O                                       | 1.99787900  | 0.55767800  | 0.78539800  | H                                      | 3.52378500  | 3.06697200  | -0.99439500 |
| C                                       | 3.39106700  | 0.83553100  | 1.00376900  | C                                      | 0.03645500  | -2.05778700 | -2.10846900 |
| H                                       | 3.77517300  | 0.02779500  | 1.63258800  | H                                      | -0.96827300 | -2.44074100 | -2.29986000 |
| H                                       | 3.95443400  | 0.85091500  | 0.06207400  | H                                      | 0.62282600  | -2.22126300 | -3.01978400 |
| H                                       | 3.53313300  | 1.78733000  | 1.52338200  | H                                      | 0.47718900  | -2.66636400 | -1.31183600 |
| C                                       | 1.51840000  | 3.58619700  | 0.84757200  | H                                      | -0.56268000 | -0.04051600 | -2.54960900 |
| H                                       | 1.98240600  | 4.57435700  | 0.75297500  |                                        |             |             |             |
| H                                       | 0.45276000  | 3.73891400  | 1.03999000  |                                        |             |             |             |
| H                                       | 1.93324700  | 3.10591400  | 1.73850200  |                                        |             |             |             |
| Structure 1a-TS2OMe-I [B3LYP/6-31G(d)]  |             |             |             | Structure 1a-TS2CO_I [B3LYP/6-31G(d)]  |             |             |             |
| C                                       | -0.00566300 | 1.29497500  | 0.00450400  | C                                      | 0.24579000  | -1.15823800 | -0.18578600 |
| C                                       | 0.93111200  | 2.27154300  | -0.48170100 | C                                      | 1.12054300  | -2.27607300 | -0.08160000 |
| C                                       | 2.24890000  | 2.00150000  | -0.66049200 | C                                      | 2.47947300  | -2.12573700 | 0.04439600  |
| C                                       | 2.76674900  | 0.68827400  | -0.37513800 | C                                      | 3.06991900  | -0.83849800 | 0.00203300  |
| C                                       | 1.90752600  | -0.32823800 | 0.12266800  | C                                      | 2.22030300  | 0.31103700  | -0.10486400 |
| C                                       | -1.37644500 | 1.63239000  | 0.07969000  | C                                      | -1.19589800 | -1.38438500 | -0.56569300 |
| O                                       | -2.35500100 | 0.81469400  | 0.23984500  | O                                      | -1.70152100 | -0.60513600 | -1.43027700 |
| O                                       | -0.37301300 | -1.19252900 | -0.67377000 | O                                      | -0.01235000 | 1.24808000  | -0.04309600 |
| Cl                                      | -3.86371200 | -2.61018000 | -0.24601600 | Cl                                     | -3.13370700 | 2.96692700  | -0.53421900 |
| C                                       | 0.01972400  | -1.11602800 | -2.04499900 | C                                      | 0.06427100  | 1.97550400  | 1.22263000  |
| H                                       | 0.54237000  | 3.25557900  | -0.71958100 | H                                      | 0.70027700  | -3.27453200 | -0.11066400 |
| H                                       | 2.92837700  | 2.76134300  | -1.03512900 | H                                      | 3.12012400  | -2.99861800 | 0.13598600  |
| H                                       | -0.61932000 | -1.79222500 | -2.62361800 | H                                      | -0.58373000 | 2.84489700  | 1.09651900  |
| H                                       | 1.06016900  | -1.43429500 | -2.15797300 | H                                      | 1.08718600  | 2.29292500  | 1.42151500  |
| H                                       | -0.08581700 | -0.09229800 | -2.42796800 | H                                      | -0.29930700 | 1.33461700  | 2.02912900  |
| Mg                                      | -2.26117600 | -1.07461700 | -0.16043500 | Mg                                     | -2.14267400 | 0.96491300  | -0.29701000 |
| C                                       | -0.04936000 | -0.61932500 | 1.71180700  | C                                      | -1.80287200 | -2.76044500 | -0.36952100 |
| H                                       | 0.11348800  | -1.70045000 | 1.75517900  | H                                      | -1.30133600 | -3.43026200 | -1.08532900 |
| H                                       | -1.12712500 | -0.44160800 | 1.82632400  | H                                      | -1.55001300 | -3.13012800 | 0.63001100  |
| C                                       | 0.45111800  | -0.06532300 | 0.36008400  | C                                      | 0.80867400  | 0.11421900  | -0.10640600 |
| C                                       | 2.44149900  | -1.60700700 | 0.37304800  | C                                      | 2.82297000  | 1.59235400  | -0.25935500 |
| C                                       | 3.78383700  | -1.88910500 | 0.15770300  | C                                      | 4.19214200  | 1.72977900  | -0.25271100 |
| H                                       | 4.16744200  | -2.88651500 | 0.35219800  | H                                      | 4.63552700  | 2.71170800  | -0.39129300 |
| C                                       | 4.63567400  | -0.88055300 | -0.31698600 | C                                      | 5.02977900  | 0.60010700  | -0.08485800 |
| H                                       | 5.68879000  | -1.09061100 | -0.48522200 | H                                      | 6.10853300  | 0.72664100  | -0.07028000 |
| C                                       | 4.13092800  | 0.38183500  | -0.57986000 | H                                      | 4.47848400  | -0.65447400 | 0.03027600  |
| H                                       | 4.78561800  | 1.16381000  | -0.95735600 | C                                      | 5.11413900  | -1.53100600 | 0.12682100  |
| H                                       | 1.78599200  | -2.40143800 | 0.71538600  | H                                      | 2.19342200  | 2.45761500  | -0.43497100 |
| O                                       | -1.68353400 | 2.93531000  | -0.07174700 | O                                      | -2.13812700 | -0.40190000 | 1.04907200  |
| C                                       | -3.07295400 | 3.28458600  | -0.13697500 | C                                      | -2.18204400 | -0.79039100 | 2.38502200  |
| H                                       | -3.08669400 | 4.36691500  | -0.27048300 | H                                      | -2.74735200 | -0.06699700 | 2.99386600  |
| H                                       | -3.56276200 | 2.79320300  | -0.98255400 | H                                      | -2.67601900 | -1.76930600 | 2.50720100  |
| H                                       | -3.58919900 | 3.00907300  | 0.78580500  | H                                      | -1.17347000 | -0.87570600 | 2.82918500  |
| C                                       | 0.63595700  | 0.05525900  | 2.90955700  | C                                      | -3.31169200 | -2.80150400 | -0.61106400 |
| H                                       | 0.47126200  | 1.13714100  | 2.89583100  | H                                      | -3.55320200 | -2.45757900 | -1.62012700 |
| H                                       | 0.23081900  | -0.34189700 | 3.84634900  | H                                      | -3.68459200 | -3.82434700 | -0.49469800 |
| H                                       | 1.71457800  | -0.12576000 | 2.89823300  | H                                      | -3.82814300 | -2.15453600 | 0.10237400  |
| Structure 1a-TS2OMe-II [B3LYP/6-31G(d)] |             |             |             | Structure 1a-TS2CO_II [B3LYP/6-31G(d)] |             |             |             |
| C                                       | -0.06693700 | 1.38330300  | -0.17061200 | C                                      | -0.22213700 | 1.11244900  | -0.03053300 |
| C                                       | -1.01930700 | 2.40300400  | 0.17863800  | C                                      | -1.15431800 | 2.16891600  | 0.17049500  |
| C                                       | -2.34514300 | 2.14941400  | 0.30927300  | C                                      | -2.50430500 | 1.93720100  | 0.26647300  |
| C                                       | -2.84102800 | 0.80671200  | 0.16409800  | C                                      | -3.02548200 | 0.63024300  | 0.09991000  |
| C                                       | -1.95508400 | -0.25609600 | -0.17077800 | C                                      | -2.11595800 | -0.45964000 | -0.10060200 |
| C                                       | 1.30728400  | 1.72835500  | -0.23618200 | C                                      | 1.20299300  | 1.44570200  | -0.37863800 |
| O                                       | 2.29756200  | 0.91545100  | -0.29474400 | O                                      | 1.75798500  | 0.76856700  | -1.29712000 |
| O                                       | 0.36367400  | -1.08892900 | 0.71390300  | O                                      | 0.16344400  | -1.27904900 | -0.10034700 |
| Cl                                      | 3.93836800  | -2.36290600 | 0.50220900  | Cl                                     | 3.37286800  | -2.78407800 | -0.71789000 |
| C                                       | -0.06366000 | -0.92484100 | 2.06236500  | C                                      | 0.12104400  | -2.11712600 | 1.09697500  |
| H                                       | -0.63863600 | 3.40547800  | 0.33839100  | H                                      | -0.78592500 | 3.18559200  | 0.24076200  |
| H                                       | -3.04295800 | 2.94052600  | 0.56732700  | H                                      | -3.19072300 | 2.76293900  | 0.43288800  |
| H                                       | 0.58738400  | -1.51874600 | 2.71593900  | H                                      | 0.81096500  | -2.93949300 | 0.89844500  |
|                                         |             |             |             | H                                      | -0.88514600 | -2.50041000 | 1.26264000  |
|                                         |             |             |             | H                                      | 0.45304500  | -1.53136200 | 1.95720000  |
|                                         |             |             |             | Mg                                     | 2.28400200  | -0.86465600 | -0.29631200 |

|   |             |             |             |
|---|-------------|-------------|-------------|
| C | 1.77728800  | 2.81201300  | -0.06407500 |
| H | 1.33356700  | 3.22310900  | 0.84796300  |
| H | 2.83951600  | 2.64813900  | 0.13425900  |
| C | -0.71702500 | -0.19026000 | -0.07206700 |
| C | -2.64936200 | -1.75201700 | -0.37318500 |
| C | -4.00937500 | -1.96029800 | -0.39289800 |
| H | -4.39979900 | -2.94770100 | -0.62216300 |
| C | -4.90618900 | -0.89487600 | -0.13459400 |
| H | -5.97685100 | -1.07803900 | -0.14258200 |
| C | -4.42247100 | 0.37137200  | 0.09739100  |
| H | -5.10409500 | 1.20132500  | 0.26542700  |
| H | -1.97388600 | -2.56432000 | -0.61762500 |
| O | 2.20576400  | 0.37114700  | 1.16547800  |
| C | 2.25198100  | 0.63295700  | 2.53171600  |
| H | 2.95008200  | -0.04600800 | 3.04675300  |
| H | 2.59504200  | 1.66151900  | 2.73482200  |
| H | 1.26507100  | 0.51716000  | 3.01669800  |
| C | 1.62608400  | 3.78520000  | -1.24884100 |
| H | 0.57712800  | 3.99611500  | -1.48412500 |
| H | 2.11730700  | 4.73585200  | -1.01720800 |
| H | 2.09376500  | 3.36443700  | -2.14352500 |

Structure la-prodOMe-I [B3LYP/6-31G(d)]

|    |             |             |             |
|----|-------------|-------------|-------------|
| C  | 0.69868200  | -1.01332300 | 0.14518200  |
| C  | 1.45590600  | -2.18252600 | -0.17275900 |
| C  | 2.78370400  | -2.09919100 | -0.48100800 |
| C  | 3.44937300  | -0.84668300 | -0.45592200 |
| C  | 2.70982700  | 0.33561200  | -0.11528300 |
| C  | -0.73294700 | -1.23839200 | 0.45206300  |
| O  | -1.64386300 | -0.40966600 | 0.32028200  |
| O  | -2.82307100 | 2.34471000  | -0.15113400 |
| Cl | -4.76281000 | -0.88567100 | -1.10455700 |
| C  | -3.23104200 | 3.66287000  | -0.29912000 |
| H  | 0.95359900  | -3.14181800 | -0.18269700 |
| H  | 3.34581800  | -2.99206500 | -0.74121800 |
| H  | -4.23505500 | 3.76386700  | -0.74935200 |
| H  | -2.53739700 | 4.23338400  | -0.94299500 |
| H  | -3.26531500 | 4.19024000  | 0.67133600  |
| Mg | -3.22674200 | 0.59199200  | -0.36880300 |
| C  | 0.55686800  | 1.51872400  | 0.56537100  |
| H  | 0.98863400  | 2.37247600  | 0.03678700  |
| H  | -0.48551600 | 1.49093500  | 0.25613400  |
| C  | 1.29900100  | 0.25554300  | 0.16802000  |
| C  | 3.43084600  | 1.56532400  | -0.06725700 |
| C  | 4.77702500  | 1.62371400  | -0.35091500 |
| H  | 5.29555400  | 2.57715400  | -0.30489000 |
| C  | 5.48910600  | 0.45454500  | -0.70231400 |
| H  | 6.55003900  | 0.51312700  | -0.92883900 |
| C  | 4.83405900  | -0.75397200 | -0.75170500 |
| H  | 5.36968700  | -1.66288200 | -1.01400100 |
| H  | 2.91932600  | 2.48026900  | 0.20361300  |
| O  | -0.98684400 | -2.46330500 | 0.89687200  |
| C  | -2.36489200 | -2.80957100 | 1.18001100  |
| H  | -2.33748000 | -3.86741500 | 1.43793300  |
| H  | -2.72505100 | -2.22006900 | 2.02684600  |
| H  | -2.99841200 | -2.62987800 | 0.30916000  |
| C  | 0.61412500  | 1.78134100  | 2.08397900  |
| H  | 0.14058300  | 0.96574100  | 2.64210500  |
| H  | 1.64505100  | 1.87630200  | 2.44315600  |
| H  | 0.07700700  | 2.70515200  | 2.32179200  |

Structure la-prodOMe-II [B3LYP/6-31G(d)]

|    |             |             |             |
|----|-------------|-------------|-------------|
| C  | 0.69870100  | -1.01316800 | 0.14566300  |
| C  | 1.45582800  | -2.18248800 | -0.17206400 |
| C  | 2.78360400  | -2.09929200 | -0.48045800 |
| C  | 3.44930200  | -0.84678900 | -0.45586800 |
| C  | 2.70983500  | 0.33562600  | -0.11549400 |
| C  | -0.73296300 | -1.23810300 | 0.45257600  |
| O  | -1.64386900 | -0.40952000 | 0.31996700  |
| O  | -2.82399400 | 2.34447600  | -0.15033800 |
| Cl | -4.76219500 | -0.88634500 | -1.10596000 |
| C  | -3.23263500 | 3.66243500  | -0.29836700 |
| H  | 0.95347200  | -3.14175900 | -0.18171800 |
| H  | 3.34566100  | -2.99226300 | -0.74046000 |
| H  | -4.24074000 | 3.76269700  | -0.73952900 |
| H  | -2.54472000 | 4.23087900  | -0.95017800 |
| H  | -3.25768000 | 4.19243600  | 0.67093300  |
| Mg | -3.22701000 | 0.59172900  | -0.36918500 |
| C  | 0.55716300  | 1.51891700  | 0.56569800  |
| H  | -0.48550600 | 1.49082900  | 0.25746500  |
| C  | 1.29907800  | 0.25566000  | 0.16818400  |

|   |             |             |             |
|---|-------------|-------------|-------------|
| C | 3.43083600  | 1.56537200  | -0.06817300 |
| C | 4.77695400  | 1.62366000  | -0.35214500 |
| H | 5.29546300  | 2.57713900  | -0.30669900 |
| C | 5.48899200  | 0.45434400  | -0.70314800 |
| H | 6.54988500  | 0.51284000  | -0.92987800 |
| C | 4.83394100  | -0.75419400 | -0.75192700 |
| H | 5.36951400  | -1.66321100 | -1.01397000 |
| H | 2.91933300  | 2.48044300  | 0.20230800  |
| O | -0.98681000 | -2.46269600 | 0.89826600  |
| C | -2.36489600 | -2.80900000 | 1.18121200  |
| H | -2.33746200 | -3.86679100 | 1.43934800  |
| H | -2.72520100 | -2.21936600 | 2.02789800  |
| H | -2.99827300 | -2.62953100 | 0.31021300  |
| C | 0.61588200  | 1.78228300  | 2.08413000  |
| H | 0.14285000  | 0.96698600  | 2.64313400  |
| H | 1.64714800  | 1.87739000  | 2.44229100  |
| H | 0.07904000  | 2.70624500  | 2.32199400  |
| H | 0.98829700  | 2.37249200  | 0.03629300  |

Structure la-prodCO-I [B3LYP/6-31G(d)]

|    |             |             |             |
|----|-------------|-------------|-------------|
| C  | 0.25831000  | 1.36021200  | -0.34216500 |
| C  | 1.27313500  | 2.32068500  | -0.04684800 |
| C  | 2.57742000  | 1.94886100  | 0.14756800  |
| C  | 2.96670700  | 0.58518800  | 0.06643100  |
| C  | 1.97465800  | -0.40416400 | -0.23217700 |
| C  | -1.15127100 | 1.79588400  | -0.48622200 |
| O  | -2.10369000 | 1.01426900  | -0.34247100 |
| O  | -0.29593700 | -0.94841800 | -0.79414100 |
| Cl | -3.47694200 | -2.25558800 | -0.87080700 |
| C  | -0.35008600 | -1.27191200 | -2.21330600 |
| H  | 1.00074100  | 3.36522800  | 0.04941800  |
| H  | 3.32970400  | 2.69765000  | 0.37921600  |
| H  | -1.14759900 | -2.00738800 | -2.31294200 |
| H  | 0.61401900  | -1.67705100 | -2.53062100 |
| H  | -0.59204600 | -0.37238600 | -2.78707900 |
| Mg | -2.11011400 | -0.92811500 | 0.37968700  |
| C  | -1.48569700 | 3.24590100  | -0.77639000 |
| H  | -0.66106000 | 3.75335000  | -1.28444000 |
| H  | -2.34305700 | 3.23059300  | -1.45708300 |
| C  | 0.63711200  | 0.02059300  | -0.45246000 |
| C  | 2.34940200  | -1.77533800 | -0.27434000 |
| C  | 3.65643600  | -2.14465500 | -0.05372300 |
| H  | 3.93295100  | -3.19460100 | -0.07620000 |
| C  | 4.64362700  | -1.16604800 | -0.21723300 |
| H  | 5.67127600  | -1.47418700 | 0.38757400  |
| C  | 4.30506000  | 0.16718500  | 0.28088500  |
| H  | 5.05788700  | 0.91844300  | 0.50437600  |
| O  | 1.58669100  | -2.52501600 | -0.45155900 |
| H  | -1.50898500 | -0.77619600 | 2.09620700  |
| C  | -1.49582700 | -1.30197200 | 3.37567400  |
| H  | -0.46903000 | -1.53851000 | 3.71591500  |
| H  | -1.91096600 | -0.59604300 | 4.12024900  |
| H  | -2.08006600 | -2.23645700 | 3.47396100  |
| C  | -1.88143500 | 3.99676400  | 0.51328700  |
| H  | -1.05191400 | 4.04673300  | 1.22633200  |
| H  | -2.18469400 | 5.01952300  | 0.26935000  |
| H  | -2.71986500 | 3.49396000  | 1.00356600  |

Structure la-prodCO-II [B3LYP/6-31G(d)]

|    |             |             |             |
|----|-------------|-------------|-------------|
| C  | 0.30620800  | 1.35826800  | 0.27172200  |
| C  | 1.40348600  | 2.10622600  | 0.79691300  |
| C  | 2.68258900  | 1.61522700  | 0.77425100  |
| C  | 2.96192900  | 0.33238000  | 0.23254300  |
| C  | 1.88512300  | -0.44318300 | -0.30654300 |
| C  | -1.07430400 | 1.89795600  | 0.36170900  |
| O  | -2.07023600 | 1.16147000  | 0.33264400  |
| O  | -0.44112100 | -0.63391000 | -0.87330500 |
| Cl | -3.71147700 | -1.63479100 | -1.17342000 |
| H  | -0.57765800 | -0.46920700 | -2.31331200 |
| C  | 1.21785900  | 3.07560900  | 1.24465000  |
| H  | 3.49888800  | 2.20060700  | 1.18816200  |
| H  | -1.43328800 | -1.08189500 | -2.59511200 |
| H  | 0.33839700  | -0.80351100 | -2.80674000 |
| H  | -0.77302500 | 0.58176400  | -2.54653600 |
| Mg | -2.19286700 | -0.91013500 | 0.36467800  |
| C  | -1.30248600 | 3.39282800  | 0.47104100  |
| H  | -2.36737300 | 3.52736100  | 0.67654200  |
| C  | 0.57674900  | 0.11042900  | -0.29309200 |
| C  | 2.15010100  | -1.74562300 | -0.81196000 |
| C  | 3.43203600  | -2.24571500 | -0.80291500 |
| H  | 3.62501200  | -3.24587600 | -1.17946800 |

|                                          |             |             |             |                                        |             |             |             |
|------------------------------------------|-------------|-------------|-------------|----------------------------------------|-------------|-------------|-------------|
| C                                        | 4.50216900  | -1.47122000 | -0.29230200 | H                                      | -0.25539600 | -2.16295900 | -0.71231500 |
| H                                        | 5.50848100  | -1.88030700 | -0.29401700 | H                                      | -0.21561700 | -2.01420400 | 1.03413000  |
| C                                        | 4.27108300  | -0.21346000 | 0.21816300  |                                        |             |             |             |
| H                                        | 5.08794200  | 0.37652400  | 0.62528800  |                                        |             |             |             |
| H                                        | 1.32489000  | -2.34848000 | -1.17360600 | Structure 7_II [B3LYP/6-31G(d)]        |             |             |             |
| O                                        | -1.50024300 | -1.40297600 | 1.97793900  | C                                      | -0.66946200 | -0.48320200 | 0.09830500  |
| C                                        | -1.47630300 | -2.32568800 | 3.00809800  | C                                      | -2.08796000 | -0.83643700 | 0.06670400  |
| H                                        | -0.46908000 | -2.76334500 | 3.14944200  | O                                      | -2.50639800 | -1.94443500 | 0.36174300  |
| H                                        | -1.75340700 | -1.87245100 | 3.97898000  | O                                      | -0.29852700 | 1.99379500  | -0.02996200 |
| H                                        | -2.16701300 | -3.17609700 | 2.85335300  | C                                      | -1.52637900 | 2.47325700  | 0.52528800  |
| C                                        | -0.90142800 | 4.14942300  | -0.81052400 | H                                      | -1.33756000 | 3.51769800  | 0.78387500  |
| H                                        | -1.12429400 | 5.21481700  | -0.69702700 | H                                      | -1.78914900 | 1.90706000  | 1.42446300  |
| H                                        | 0.16632800  | 4.04604300  | -1.02731200 | H                                      | -2.33853400 | 2.40017600  | -0.19765300 |
| H                                        | -1.46445500 | 3.77967900  | -1.67399500 | C                                      | 0.03437800  | 0.69354300  | -0.00338100 |
| H                                        | -0.74931800 | 3.79410200  | 1.32841200  | O                                      | -2.91450000 | 0.14723100  | -0.38642700 |
|                                          |             |             |             | C                                      | -4.30218300 | -0.21224400 | -0.44790900 |
|                                          |             |             |             | H                                      | -4.81772000 | 0.67417700  | -0.82082700 |
| Structure 1a-prodCO-III [B3LYP/6-31G(d)] |             |             |             | H                                      | -4.45183800 | -1.05554000 | -1.12722000 |
| C                                        | 0.21996700  | 1.42169100  | -0.02432500 | H                                      | -4.67869500 | -0.48765600 | 0.54125100  |
| C                                        | 1.19316300  | 2.38508000  | 0.38023900  | C                                      | 1.65970600  | -0.97598200 | 0.04755900  |
| C                                        | 2.52554800  | 2.07332700  | 0.44898800  | C                                      | 1.47390300  | 0.41125200  | -0.05071100 |
| C                                        | 2.98720900  | 0.76907100  | 0.12702500  | C                                      | 2.55356400  | 1.28829600  | -0.17450000 |
| C                                        | 2.03836500  | -0.21969300 | -0.28916200 | C                                      | 3.83884100  | 0.74558100  | -0.19719200 |
| C                                        | -1.22039900 | 1.78313000  | -0.03793700 | H                                      | 4.69987000  | 1.40158800  | -0.23840900 |
| O                                        | -2.11528100 | 0.92789100  | -0.00822500 | C                                      | 4.03206000  | -0.63873700 | -0.09501200 |
| O                                        | -0.22241800 | -0.81274900 | -0.83708300 | H                                      | 5.04150700  | -1.04103800 | -0.11310000 |
| Cl                                       | -3.31679900 | -2.30633200 | -0.99022400 | C                                      | 2.94390800  | -1.50949300 | 0.03229400  |
| C                                        | -0.34575200 | -0.88741100 | -2.28585800 | H                                      | 2.39110100  | 2.35912700  | -0.24788500 |
| H                                        | 0.86842500  | 3.38070900  | 0.65902800  | C                                      | 3.10456900  | -2.58155100 | 0.11655300  |
| H                                        | 3.24519600  | 2.82220300  | 0.76783900  | H                                      | 0.31499300  | -1.63974400 | 0.18014400  |
| H                                        | -1.09095000 | -1.65944500 | -2.47422100 | H                                      | 0.12931800  | -2.37959100 | -0.60984100 |
| H                                        | 0.62295300  | -1.14716200 | -2.72010800 | H                                      | 0.21031100  | -2.18372700 | 1.12886900  |
| H                                        | -0.69268700 | 0.07413400  | -2.67559600 |                                        |             |             |             |
| Mg                                       | -1.96936900 | -1.10467100 | 0.39947900  | Structure 7·EtMgCl_I [B3LYP/6-31G(d)]  |             |             |             |
| C                                        | -1.61966600 | 3.24737200  | -0.07520700 | C                                      | 0.51663200  | 1.11837000  | 0.21900700  |
| C                                        | 0.66866200  | 0.14795300  | -0.37725000 | C                                      | -0.76276100 | 1.78134500  | 0.26333700  |
| C                                        | 2.48689800  | -1.53825300 | -0.57551200 | O                                      | -1.87815100 | 1.23253900  | 0.22297800  |
| C                                        | 3.82220400  | -1.85464900 | -0.47242700 | O                                      | -0.29970700 | -1.11497000 | 0.28662400  |
| H                                        | 4.15582100  | -2.86686300 | -0.68099600 | C                                      | -0.08916800 | -2.53787600 | 0.42837600  |
| C                                        | 4.76525700  | -0.87292300 | -0.08229100 | H                                      | -1.08456400 | -2.94727600 | 0.59874500  |
| H                                        | 5.81584900  | -1.13867100 | -0.00702100 | H                                      | 0.55115600  | -2.73709900 | 1.28978900  |
| C                                        | 4.35601800  | 0.40795300  | 0.21478100  | H                                      | 0.33230300  | -2.94664100 | -0.49222000 |
| H                                        | 5.07570600  | 1.15916100  | 0.52923500  | C                                      | -3.65781200 | -1.81048600 | 0.81900400  |
| H                                        | 1.75925700  | -2.29547600 | -0.84453600 | C                                      | 0.72675800  | -0.24042100 | 0.21901300  |
| O                                        | -1.29086500 | -1.16793900 | 2.09139900  | O                                      | -0.65674200 | 3.11073900  | 0.36114600  |
| C                                        | -1.17608300 | -1.87077100 | 3.27747700  | C                                      | -1.88990400 | 3.85834300  | 0.36499600  |
| H                                        | -0.12029000 | -2.09057700 | 3.52819600  | H                                      | -1.58754500 | 4.90306700  | 0.43157800  |
| H                                        | -1.58480900 | -1.30591900 | 4.13697000  | H                                      | -2.44727100 | 3.67375000  | -0.55606300 |
| H                                        | -1.70297000 | -2.84360400 | 3.26603000  | H                                      | -2.50233800 | 3.57718700  | 1.22477900  |
| H                                        | -1.30869300 | 3.69609000  | 0.87984900  | H                                      | -4.70615900 | -1.55341700 | 0.59358900  |
| C                                        | -3.11610700 | 3.46882100  | -0.29468100 | C                                      | -3.44495200 | -1.68037400 | 2.34104600  |
| H                                        | -3.44476800 | 3.04196700  | -1.24688500 | H                                      | -2.42458500 | -1.96139400 | 2.64467500  |
| H                                        | -3.70451900 | 2.99960300  | 0.49771900  | H                                      | -3.59035300 | -0.64636700 | 2.68387900  |
| H                                        | -3.33606400 | 4.54087900  | -0.30300400 | H                                      | -4.12730200 | -2.30656700 | 2.93985200  |
| H                                        | -1.02262800 | 3.75485800  | -0.84433100 | H                                      | -3.58815600 | -2.87618100 | 0.53975200  |
|                                          |             |             |             | C                                      | 2.83355600  | 0.71477600  | 0.12288700  |
| Structure 7_I [B3LYP/6-31G(d)]           |             |             |             | C                                      | 2.16818900  | -0.53258900 | 0.15132300  |
| C                                        | -0.75430100 | -0.16613600 | 0.00811600  | C                                      | 2.91401400  | -1.72092500 | 0.09688100  |
| C                                        | -2.20948600 | -0.15463000 | -0.11715400 | C                                      | 4.30380400  | -1.64112500 | 0.02593500  |
| O                                        | -2.92937800 | 0.76752900  | -0.47054100 | H                                      | 4.88588000  | -2.55688200 | -0.01870300 |
| O                                        | 0.03934400  | 2.20656100  | -0.08048200 | C                                      | 4.95504700  | -0.40307300 | 0.00715200  |
| C                                        | -1.14279300 | 2.87735500  | 0.38096300  | H                                      | 6.03920200  | -0.36489100 | -0.04829700 |
| H                                        | -0.85405100 | 3.92610900  | 0.47287000  | C                                      | 4.21917900  | 0.78308700  | 0.05272000  |
| H                                        | -1.43755000 | 2.48399700  | 1.35994200  | H                                      | 2.44665100  | -2.69607300 | 0.09885900  |
| H                                        | -1.96753100 | 2.74915900  | -0.31768900 | H                                      | 4.72278500  | 1.74595800  | 0.02974300  |
| C                                        | 0.14703600  | 0.87340500  | -0.05024200 | C                                      | 1.83738600  | 1.84159000  | 0.16261000  |
| O                                        | -2.72130000 | -1.38454200 | 0.18159300  | H                                      | 1.91517800  | 2.48563400  | -0.72360700 |
| C                                        | -4.13980300 | -1.50775800 | 0.02590100  | H                                      | 1.98576100  | 2.49493100  | 1.03287200  |
| H                                        | -4.37320200 | -2.54202200 | 0.28305600  | Mg                                     | -2.41078900 | -0.63116500 | -0.43686200 |
| H                                        | -4.66550300 | -0.81999500 | 0.69441400  | Cl                                     | -1.94083400 | -0.63082800 | -2.68462300 |
| H                                        | -4.43864700 | -1.29188600 | -1.00386600 |                                        |             |             |             |
| C                                        | 1.45665600  | -1.05200600 | 0.03878700  | Structure 7·EtMgCl_II [B3LYP/6-31G(d)] |             |             |             |
| C                                        | 1.51660200  | 0.34694900  | -0.04905800 | C                                      | -0.62884000 | 1.10354100  | -0.22621100 |
| C                                        | 2.73481700  | 1.02601400  | -0.10727200 | C                                      | 0.64079900  | 1.78617300  | -0.27174800 |
| C                                        | 3.90757700  | 0.27052300  | -0.08589900 | O                                      | 1.76248500  | 1.24986600  | -0.29978600 |
| H                                        | 4.87177500  | 0.76928700  | -0.13482500 | O                                      | 0.21528100  | -1.10753400 | -0.46994400 |
| C                                        | 3.85549700  | -1.12737200 | 0.00070600  | C                                      | 0.01869600  | -2.50394200 | -0.78703700 |
| H                                        | 4.78066100  | -1.69741900 | 0.01788900  | H                                      | -0.66880800 | -2.60398700 | -1.62918500 |
| C                                        | 2.62949200  | -1.79889800 | 0.06751300  | H                                      | -0.34315000 | -3.03942300 | 0.09328700  |
| H                                        | 2.76093800  | 2.10944700  | -0.16919700 | H                                      | 1.00782000  | -2.86678100 | -1.06519300 |
| H                                        | 2.60021100  | -2.88348800 | 0.13934800  | C                                      | 3.55239600  | -1.75623900 | -1.05001600 |
| C                                        | 0.01280200  | -1.47784900 | 0.10291900  | H                                      | 3.11210300  | -1.75779100 | -2.06349600 |

|    |             |             |             |
|----|-------------|-------------|-------------|
| H  | 3.56368100  | -2.81837900 | -0.75004500 |
| C  | -0.82069000 | -0.25472000 | -0.31172800 |
| O  | 0.51616100  | 3.11725100  | -0.28702500 |
| C  | 1.74017900  | 3.88007800  | -0.28142900 |
| H  | 1.42403100  | 4.92279400  | -0.27268900 |
| H  | 2.32811200  | 3.64536000  | 0.60865600  |
| H  | 2.32842600  | 3.66135700  | -1.17553200 |
| C  | 5.01666000  | -1.28000700 | -1.16450000 |
| H  | 5.08140700  | -0.24057300 | -1.51673400 |
| H  | 5.53070800  | -1.31418200 | -0.19423500 |
| H  | 5.62305100  | -1.88294600 | -1.86094000 |
| C  | -2.25346200 | -0.57469300 | -0.21198600 |
| C  | -2.93525700 | 0.65653800  | -0.07661700 |
| C  | -5.03320800 | -0.50421900 | 0.04461600  |
| H  | -6.11492700 | -0.48897600 | 0.14250800  |
| C  | -4.36438500 | -1.72706100 | -0.07699700 |
| H  | -4.93039500 | -2.65387500 | -0.06827700 |
| C  | -2.97721700 | -1.77746400 | -0.20480100 |
| H  | -2.49364400 | -2.74168500 | -0.28429200 |
| C  | -1.95654600 | 1.79974200  | -0.07328900 |
| H  | -2.01135700 | 2.37866700  | 0.85845000  |
| H  | -2.14445600 | 2.50989700  | -0.88969800 |
| C  | -4.31810100 | 0.69555800  | 0.04920000  |
| H  | -4.83530500 | 1.64563200  | 0.15460800  |
| Mg | 2.31767800  | -0.63962300 | 0.27443300  |
| Cl | 1.86429500  | -0.70682400 | 2.52523000  |

Structure 7·EtMgCl\_III [B3LYP/6-31G(d)]

|    |             |             |             |
|----|-------------|-------------|-------------|
| C  | -0.63508900 | 1.19975600  | 0.01417200  |
| C  | 0.59784000  | 1.95191700  | 0.02407700  |
| O  | 1.74338100  | 1.47701500  | 0.08967700  |
| O  | 0.30161600  | -0.94372700 | 0.50698800  |
| C  | 0.15492400  | -2.15589600 | 1.29726600  |
| H  | -0.10024300 | -2.99008200 | 0.64008400  |
| H  | -0.60495700 | -2.00841500 | 2.06625900  |
| H  | 1.13440600  | -2.30958000 | 1.75143000  |
| C  | 2.54380700  | -0.95443900 | -2.26452400 |
| C  | -0.75982300 | -0.14694400 | 0.25643900  |
| O  | 0.40374600  | 3.27287800  | -0.04888800 |
| C  | 1.58718300  | 4.09832200  | -0.05905800 |
| H  | 1.21829700  | 5.12142000  | -0.12500800 |
| H  | 2.16053000  | 3.95018800  | 0.85863700  |
| H  | 2.21172900  | 3.85475700  | -0.92157100 |
| H  | 1.78034100  | -0.39353700 | -2.83187200 |
| C  | 2.40518700  | -2.45214500 | -2.60709100 |
| H  | 3.17733800  | -3.05580900 | -2.11116100 |
| H  | 1.43548500  | -2.85985900 | -2.28320800 |
| H  | 2.48422200  | -2.66766200 | -3.68607000 |
| H  | 3.50295800  | -0.59480500 | -2.67290300 |
| C  | -2.91629000 | 0.61913800  | -0.10102800 |
| C  | -2.17209100 | -0.54851400 | 0.17829300  |
| C  | -2.81888600 | -1.78856100 | 0.28226300  |
| C  | -4.20306900 | -1.83638300 | 0.12451700  |
| H  | -4.71499400 | -2.79105100 | 0.20171400  |
| C  | -4.93805500 | -0.67415400 | -0.13672300 |
| H  | -6.01621300 | -0.73479200 | -0.25450900 |
| C  | -4.29560400 | 0.56081700  | -0.25686200 |
| H  | -2.27344500 | -2.70459700 | 0.46948400  |
| H  | -4.86606200 | 1.46609700  | -0.47395200 |
| C  | -1.99666100 | 1.80598800  | -0.21944200 |
| H  | -2.22432200 | 2.58479400  | 0.52063100  |
| H  | -2.07569600 | 2.28542900  | -1.20453900 |
| Mg | 2.43442900  | -0.43692800 | -0.20718500 |
| Cl | 3.50866400  | -1.14271200 | 1.70392700  |

Structure 7·EtMgCl\_IV [B3LYP/6-31G(d)]

|   |             |             |             |
|---|-------------|-------------|-------------|
| C | 0.49784500  | 1.09729400  | -0.24407700 |
| C | -0.79279100 | 1.73613300  | -0.35126000 |
| O | -1.89657700 | 1.16898000  | -0.30550300 |
| O | -0.26315300 | -1.16823600 | -0.30674500 |
| C | -0.02238600 | -2.49226900 | -0.85800000 |
| H | 0.30817400  | -3.16354800 | -0.06232100 |
| H | 0.71548200  | -2.43230400 | -1.65937700 |
| H | -0.98860900 | -2.80836500 | -1.25253500 |
| C | -2.56578600 | -0.88239000 | 2.42247900  |
| H | -2.50203400 | -1.94568700 | 2.70803200  |
| H | -3.57439800 | -0.57915200 | 2.74899300  |
| C | 0.73125600  | -0.25654300 | -0.23963900 |
| O | -0.70678300 | 3.06069100  | -0.51209400 |
| C | -1.95338000 | 3.78029600  | -0.61178000 |
| H | -1.66837000 | 4.82431000  | -0.73809300 |

|    |             |             |             |
|----|-------------|-------------|-------------|
| H  | -2.52763000 | 3.42740400  | -1.47118200 |
| H  | -2.54163600 | 3.64635900  | 0.29889700  |
| C  | -1.52832700 | -0.09125200 | 3.24469000  |
| H  | -0.49778600 | -0.39822700 | 3.01140800  |
| H  | -1.58265300 | 0.98903900  | 3.04370700  |
| H  | -1.64446600 | -0.20759500 | 4.33550300  |
| C  | 2.17366300  | -0.52273000 | -0.13285700 |
| C  | 2.82102200  | 0.73228700  | -0.09507200 |
| C  | 4.94627100  | -0.36500100 | 0.10797500  |
| H  | 6.02763900  | -0.31576100 | 0.19848000  |
| C  | 4.30835900  | -1.61065900 | 0.08750200  |
| H  | 4.89812000  | -2.51901000 | 0.16814300  |
| C  | 2.92252800  | -1.70430200 | -0.03031200 |
| H  | 2.45516800  | -2.68061500 | -0.02985600 |
| C  | 1.80664100  | 1.84295700  | -0.16523300 |
| H  | 1.95689500  | 2.48961900  | -1.04001500 |
| H  | 1.85909300  | 2.49844400  | 0.71460300  |
| C  | 4.20281600  | 0.81490900  | 0.02294500  |
| H  | 4.69811200  | 1.78187500  | 0.05362300  |
| Mg | -2.44881800 | -0.71238400 | 0.30780600  |
| Cl | -3.43290400 | -1.82482500 | -1.45124100 |

Structure 7-TSOMe-I [B3LYP/6-31G(d)]

|    |             |             |             |
|----|-------------|-------------|-------------|
| Cl | -3.73471500 | -2.30748200 | 0.01163100  |
| C  | 0.26337000  | 1.14537100  | -0.30493600 |
| C  | -1.03320600 | 1.69954100  | -0.28118100 |
| O  | -2.09274600 | 1.00451400  | -0.20638500 |
| O  | -0.33067600 | -1.16746700 | -1.01323300 |
| C  | -0.20572700 | -1.07146800 | -2.45418100 |
| H  | -0.85146100 | -1.85257700 | -2.85687700 |
| H  | 0.83328300  | -1.25111900 | -2.74234000 |
| H  | -0.53022400 | -0.08666200 | -2.80086800 |
| Mg | -1.95545600 | -0.94997900 | 0.21443000  |
| C  | -0.37001300 | -1.04357500 | 1.82599100  |
| H  | 0.59769200  | -1.54305600 | 1.85620200  |
| H  | -1.09691600 | -1.82206600 | 2.14055200  |
| O  | 0.47209600  | -0.24654000 | -0.27817400 |
| C  | -1.10572200 | 3.04058600  | -0.30332900 |
| C  | -2.41887600 | 3.61907600  | -0.21915400 |
| H  | -2.25909000 | 4.69678600  | -0.26126900 |
| H  | -3.04106800 | 3.29088300  | -1.05563400 |
| H  | -2.90472100 | 3.34147400  | 0.71978800  |
| C  | -0.43209600 | 0.16121000  | 2.75207200  |
| H  | -1.46505600 | 0.45161500  | 2.98364900  |
| H  | 0.07578400  | -0.00954500 | 3.71269900  |
| H  | 0.04844700  | 1.03946400  | 2.29580500  |
| C  | 1.91249500  | -0.49743900 | -0.14961200 |
| C  | 2.57181500  | 0.73912700  | -0.02095600 |
| C  | 2.61890100  | -1.70268900 | -0.14289700 |
| H  | 2.09672200  | -2.65004100 | -0.24309700 |
| C  | 4.00533700  | -1.65664200 | 0.00419800  |
| H  | 4.57787200  | -2.57984700 | 0.01517400  |
| C  | 4.66616700  | -0.42881700 | 0.14187300  |
| H  | 5.74642600  | -0.41213300 | 0.25817700  |
| C  | 3.95480000  | 0.77556400  | 0.12755500  |
| H  | 4.47909700  | 1.72303400  | 0.22511300  |
| C  | 1.57634100  | 1.87691100  | -0.11153200 |
| H  | 1.80736000  | 2.54342500  | -0.95559200 |
| H  | 1.58620000  | 2.58084700  | 0.78681700  |

Structure 7-TSOMe-II [B3LYP/6-31G(d)]

|    |             |             |             |
|----|-------------|-------------|-------------|
| Cl | -3.72401200 | -2.15853800 | -0.15396400 |
| C  | 0.24015300  | 1.33343100  | -0.10015200 |
| C  | -1.05458400 | 1.87500600  | 0.01413500  |
| O  | -2.11610000 | 1.17751700  | -0.02315800 |
| O  | -0.36394000 | -0.84102500 | -1.14794700 |
| C  | -0.29064300 | -0.49938300 | -2.55232000 |
| H  | -0.93406100 | -1.21839000 | -3.06336000 |
| H  | 0.74139300  | -0.60129700 | -2.90057700 |
| H  | -0.64717200 | 0.52069800  | -2.71945900 |
| Mg | -1.95099100 | -0.81313300 | 0.15745400  |
| C  | -0.34596100 | -1.16054100 | 1.70373100  |
| H  | -1.21144000 | -0.87348000 | 2.34025200  |
| C  | 0.45034200  | -0.04566200 | -0.29500000 |
| O  | -1.12728700 | 3.20212200  | 0.21258500  |
| C  | -2.44072800 | 3.75934500  | 0.38569900  |
| H  | -2.28098500 | 4.82896700  | 0.52440100  |
| H  | -3.05855400 | 3.57571600  | -0.49697700 |
| H  | -2.93215800 | 3.32970000  | 1.26247200  |
| C  | 1.88699700  | -0.32028900 | -0.20696900 |
| C  | 2.54215800  | 0.87084300  | 0.16070900  |

|                                      |             |             |             |                                        |             |             |             |
|--------------------------------------|-------------|-------------|-------------|----------------------------------------|-------------|-------------|-------------|
| C                                    | 2.59802700  | -1.50076000 | -0.43692900 | H                                      | 2.80199800  | -2.59174500 | 0.16390600  |
| H                                    | 2.08305900  | -2.40799500 | -0.73772400 | C                                      | 1.61322300  | 1.80111600  | -0.09376500 |
| C                                    | 3.98336600  | -1.48151500 | -0.27170300 | H                                      | 1.74972300  | 2.48823300  | -0.93941400 |
| H                                    | 4.55953200  | -2.38663000 | -0.44174800 | H                                      | 1.46794100  | 2.43397000  | 0.79239200  |
| C                                    | 4.63813500  | -0.30436200 | 0.11247600  | H                                      | -0.88814700 | 1.56308800  | 1.91516300  |
| H                                    | 5.71749400  | -0.30851200 | 0.23795900  | C                                      | -3.02259900 | 1.16507500  | 1.99971500  |
| C                                    | 3.92316800  | 0.87931700  | 0.32621700  | H                                      | -3.14249900 | 1.24371400  | 3.09075900  |
| H                                    | 4.44433600  | 1.79113800  | 0.60736700  | H                                      | -3.30560000 | 2.13458000  | 1.57587900  |
| C                                    | 1.54460800  | 2.00414400  | 0.27795100  | H                                      | -3.77697200 | 0.43622400  | 1.66535500  |
| H                                    | 1.80031300  | 2.83814600  | -0.39124400 | C                                      | 4.11595500  | 1.09346600  | 0.31862600  |
| H                                    | 1.52119300  | 2.42521500  | 1.29357500  | H                                      | 4.48784600  | 2.11312100  | 0.38385700  |
| H                                    | 0.49270900  | -0.59825100 | 2.11310200  |                                        |             |             |             |
| C                                    | -0.10857200 | -2.66838500 | 1.77912800  |                                        |             |             |             |
| H                                    | -0.96114400 | -3.24896200 | 1.40354500  |                                        |             |             |             |
| H                                    | 0.76874900  | -2.95990200 | 1.18984100  |                                        |             |             |             |
| H                                    | 0.07666000  | -3.00947200 | 2.81030000  |                                        |             |             |             |
| Structure 7-TSCO-I [B3LYP/6-31G(d)]  |             |             |             | Structure 7-intOMe-I [B3LYP/6-31G(d)]  |             |             |             |
| Cl                                   | -3.59238500 | -2.45595500 | 0.35292300  | Cl                                     | 4.00122900  | -2.26366900 | 0.27899900  |
| C                                    | 0.34239500  | 0.83205700  | -0.38048700 | C                                      | -0.19068800 | 1.13235400  | -0.03685200 |
| C                                    | -1.06394600 | 1.28526800  | -0.54540800 | C                                      | 1.05736600  | 1.69748700  | -0.04406100 |
| O                                    | -1.87849400 | 0.59798800  | -1.28523700 | O                                      | 2.18452000  | 1.06948000  | -0.26238400 |
| O                                    | -0.20041800 | -1.50214200 | -0.16282900 | O                                      | 0.43239200  | -1.25702900 | 0.51667000  |
| C                                    | -0.10489300 | -2.52439100 | -1.19510000 | C                                      | 0.10885100  | -1.26980400 | 1.91780600  |
| H                                    | -0.87921900 | -3.25469500 | -0.95896800 | H                                      | 0.88335300  | -1.85759800 | 2.41878500  |
| H                                    | 0.88227500  | -2.98748600 | -1.16883900 | H                                      | -0.86235300 | -1.74476100 | 2.07450700  |
| H                                    | -0.28620800 | -2.07020500 | -2.17343400 | Hg                                     | 0.08781200  | -0.24888600 | 2.31704100  |
| Mg                                   | -2.17649100 | -0.73415400 | 0.10989400  | Mg                                     | 2.34273200  | -0.80095700 | 0.05699700  |
| C                                    | -1.80453000 | 0.97248500  | 1.56282800  | C                                      | -0.03151400 | -0.79984900 | -1.78178800 |
| H                                    | -2.13166400 | 0.06286600  | 2.12232000  | H                                      | -0.23332600 | -1.87557900 | -1.84637100 |
| H                                    | -2.70578500 | 1.59356500  | 1.47288000  | H                                      | 1.05326700  | -0.67275600 | -1.93592300 |
| C                                    | 0.71706200  | -0.46238300 | -0.25185900 | C                                      | -0.43507900 | -0.30117200 | -0.37591100 |
| O                                    | -1.13504100 | 2.64015200  | -0.55608100 | O                                      | 1.12974100  | 3.02839600  | 0.22951800  |
| C                                    | -2.37013100 | 3.20594900  | -1.01430400 | C                                      | 2.43273000  | 3.60761800  | 0.32478400  |
| H                                    | -2.22907900 | 4.28625000  | -0.96018300 | H                                      | 2.26184500  | 4.66139000  | 0.55286900  |
| H                                    | -2.58119500 | 2.89528200  | -2.03979300 | H                                      | 3.01993600  | 3.14446300  | 1.12434600  |
| H                                    | -3.20013200 | 2.90420800  | -0.36840200 | H                                      | 2.98145300  | 3.51265400  | -0.61656800 |
| C                                    | -0.75025600 | 1.66082500  | 2.42074000  | C                                      | -0.73724900 | -0.05538300 | -2.91929600 |
| H                                    | 0.15027100  | 1.04266800  | 2.52691500  | H                                      | -0.52191300 | 1.01637700  | -2.87351900 |
| H                                    | -0.45173500 | 2.61496800  | 1.97133800  | H                                      | -0.39675800 | -0.43406700 | -3.88862300 |
| H                                    | -1.10859400 | 1.88244900  | 3.43622200  | H                                      | -1.82209300 | -0.19027500 | -2.86524300 |
| C                                    | 2.16143400  | -0.59503700 | -0.06930000 | C                                      | -1.90188100 | -0.48780700 | -0.06813700 |
| C                                    | 2.69422200  | 0.71139700  | -0.13290000 | C                                      | -2.48475200 | 0.71675100  | 0.34676600  |
| C                                    | 4.89498100  | -0.18687200 | 0.21400900  | C                                      | -2.65766600 | -1.65813400 | -0.16588100 |
| H                                    | 5.96571300  | -0.03894400 | 0.32282500  | H                                      | -2.19929400 | -2.59121000 | -0.48454500 |
| C                                    | 4.36223000  | -1.47740100 | 0.29921000  | C                                      | -4.01332000 | -1.61480700 | 0.16427000  |
| H                                    | 5.02285000  | -2.32085500 | 0.47952400  | H                                      | -4.61557900 | -2.51683600 | 0.09949100  |
| C                                    | 2.98944100  | -1.69636200 | 0.16177200  | C                                      | -4.60039900 | -0.41259300 | 0.57731600  |
| H                                    | 2.58517800  | -2.69977800 | 0.25528700  | H                                      | -5.65731700 | -0.38954000 | 0.82968800  |
| C                                    | 1.57068900  | 1.70843400  | -0.31549300 | C                                      | -3.84163200 | 0.75694000  | 0.66782100  |
| H                                    | 1.67945700  | 2.31098000  | -1.22733600 | H                                      | -4.30577800 | 1.68711100  | 0.98685400  |
| H                                    | 1.51711600  | 2.42018500  | 0.51828600  | C                                      | -1.47229400 | 1.83955500  | 0.36095800  |
| C                                    | 4.06015800  | 0.91785100  | 0.00416000  | H                                      | -1.41538400 | 2.32456800  | 1.34692000  |
| H                                    | 4.47768700  | 1.92072300  | -0.04108700 | H                                      | -1.75960300 | 2.63510700  | -0.34385500 |
| Structure 7-TSCO-II [B3LYP/6-31G(d)] |             |             |             | Structure 7-intOMe-II [B3LYP/6-31G(d)] |             |             |             |
| Cl                                   | -3.36724500 | -2.57671000 | 0.22838700  | Cl                                     | 3.96978600  | -2.11233500 | 0.53258800  |
| C                                    | 0.43754100  | 0.88052100  | -0.31570200 | C                                      | -0.22655900 | 1.22716700  | -0.20302600 |
| C                                    | -0.98014700 | 1.28595400  | -0.50542400 | C                                      | 1.01399300  | 1.80281700  | -0.22903000 |
| O                                    | -1.75149700 | 0.59945100  | -1.29191300 | O                                      | 2.16074100  | 1.17256000  | -0.31302900 |
| O                                    | -0.00679100 | -1.48531700 | -0.28807700 | O                                      | 0.40377900  | -1.08704500 | 0.57598800  |
| C                                    | 0.14395600  | -2.38784000 | -1.41853900 | C                                      | 0.07506200  | -0.96115000 | 1.97274900  |
| H                                    | -0.58235400 | -3.18540900 | -1.25955600 | H                                      | 0.85426900  | -1.48847800 | 2.53051900  |
| H                                    | 1.15819000  | -2.79025100 | -1.43829300 | H                                      | -0.89153300 | -1.42771600 | 2.17396300  |
| H                                    | -0.06950200 | -1.84726400 | -2.34514400 | H                                      | 0.04221800  | 0.09519100  | 2.26300400  |
| Mg                                   | -2.01267000 | -0.79967300 | 0.04647400  | Mg                                     | 2.33327500  | -0.66112100 | 0.14243000  |
| C                                    | -1.58942500 | 0.79250100  | 1.59517500  | C                                      | -0.01802100 | -0.77544500 | -1.78227400 |
| H                                    | -1.25245900 | -0.12276400 | 2.12976500  | H                                      | 1.01731500  | -0.44514600 | -1.96839400 |
| C                                    | 0.86454100  | -0.40279000 | -0.25879000 | C                                      | -0.45645300 | -0.24367700 | -0.39413300 |
| O                                    | -1.10797700 | 2.63844700  | -0.46944000 | O                                      | 1.06065800  | 3.16044300  | -0.12938400 |
| C                                    | -2.29408000 | 3.18348600  | -1.06529900 | C                                      | 2.35056100  | 3.76823500  | -0.04595600 |
| H                                    | -2.21841700 | 4.26150900  | -0.91491800 | H                                      | 2.15773500  | 4.83998000  | 0.03210900  |
| H                                    | -2.33364800 | 2.94814100  | -2.13159600 | H                                      | 2.90046200  | 3.42490100  | 0.83645600  |
| H                                    | -3.19520500 | 2.79965200  | -0.58136800 | C                                      | 2.94908400  | 3.56048300  | -0.93765500 |
| C                                    | 2.30021600  | -0.48677800 | 0.00047900  | H                                      | -1.93211600 | -0.40325000 | -0.08710700 |
| C                                    | 2.77188000  | 0.84200700  | 0.08040000  | C                                      | -2.53497300 | 0.84788800  | 0.10754700  |
| C                                    | 4.98902200  | 0.01065500  | 0.48536600  | C                                      | -2.68201900 | -1.57819900 | 0.02252600  |
| H                                    | 6.04329800  | 0.19417700  | 0.67255800  | H                                      | -2.21278600 | -2.55088800 | -0.08756600 |
| C                                    | 4.51507500  | -1.30395000 | 0.42593800  | C                                      | -4.04666600 | -1.48933800 | 0.30575700  |
| H                                    | 5.20424500  | -2.13091000 | 0.57277800  | H                                      | -4.63828300 | -2.39601900 | 0.39831700  |
| C                                    | 3.16432100  | -1.56818500 | 0.18565900  | C                                      | -4.65370600 | -0.24013300 | 0.47387400  |
|                                      |             |             |             | H                                      | -5.71711300 | -0.18232100 | 0.69090500  |
|                                      |             |             |             | C                                      | -3.90048200 | 0.93209800  | 0.37784000  |
|                                      |             |             |             | H                                      | -4.37330900 | 1.90048900  | 0.52327800  |
|                                      |             |             |             | C                                      | -1.53088900 | 1.97182200  | -0.00614800 |
|                                      |             |             |             | H                                      | -1.53678300 | 2.61373100  | 0.88706400  |

|   |             |             |             |
|---|-------------|-------------|-------------|
| H | -1.77671300 | 2.63679200  | -0.84939500 |
| H | -0.60932300 | -0.21149200 | -2.51212700 |
| C | -0.14479300 | -2.27713800 | -2.06958500 |
| H | 0.37865200  | -2.88908500 | -1.32781500 |
| H | -1.19171800 | -2.59244000 | -2.08993200 |
| H | 0.28311400  | -2.50269800 | -3.05269200 |

Structure 7-intCO-I [B3LYP/6-31G(d)]

|    |             |             |             |
|----|-------------|-------------|-------------|
| Cl | -3.58256300 | -2.93051700 | 0.53699300  |
| C  | 0.29525000  | 0.79737600  | -0.05774700 |
| C  | -1.07208700 | 1.48771600  | -0.06730200 |
| O  | -2.11071900 | 0.61268600  | -0.26712700 |
| O  | -0.29718800 | -1.60582000 | -0.08275300 |
| C  | -0.16811900 | -2.43780000 | -1.27477800 |
| H  | -0.87369500 | -3.26097000 | -1.14666000 |
| H  | 0.84864600  | -2.82130400 | -1.35270300 |
| H  | -0.41036800 | -1.84430100 | -2.16249800 |
| Mg | -2.28890800 | -1.15440400 | 0.19400700  |
| C  | -1.36829700 | 2.25700900  | 1.26296500  |
| H  | -1.28741000 | 1.53470400  | 2.08675500  |
| H  | -2.43176800 | 2.51367800  | 1.19667200  |
| C  | 0.60382400  | -0.52179300 | -0.04515900 |
| O  | -0.94195200 | 2.41291800  | -1.16574500 |
| C  | -2.13947500 | 3.06987000  | -1.55522700 |
| H  | -1.90951000 | 3.58954200  | -2.48961800 |
| H  | -2.94967400 | 2.35380900  | -1.72327000 |
| H  | -2.46698800 | 3.81309000  | -0.81344300 |
| C  | -0.56240200 | 3.52015300  | 1.58538600  |
| H  | 0.44218700  | 3.29796800  | 1.95892000  |
| H  | -0.46026700 | 4.15807100  | 0.70184000  |
| H  | -1.06858000 | 4.10017100  | 2.36569600  |
| C  | 2.05110900  | -0.75770800 | 0.02623200  |
| C  | 2.67006100  | 0.50430000  | -0.03723300 |
| C  | 4.82051700  | -0.55301600 | 0.12992700  |
| H  | 5.90413600  | -0.48374500 | 0.16697400  |
| C  | 4.20270800  | -1.80435100 | 0.22048800  |
| H  | 4.81063100  | -2.69749700 | 0.33609900  |
| C  | 2.81063400  | -1.92106200 | 0.17354500  |
| H  | 2.34214700  | -2.89558900 | 0.27853900  |
| C  | 1.60311400  | 1.56769700  | -0.10180800 |
| H  | 1.63690100  | 2.15822800  | -1.02688500 |
| H  | 1.70168500  | 2.28600600  | 0.71896100  |
| C  | 4.05382300  | 0.61261500  | 0.00922300  |
| H  | 4.53729500  | 1.58547900  | -0.03842600 |

Structure 7-intCO-II [B3LYP/6-31G(d)]

|    |             |             |             |
|----|-------------|-------------|-------------|
| Cl | -3.29895100 | -3.05541700 | 0.60900600  |
| C  | 0.29261900  | 0.90666800  | 0.04784500  |
| C  | -1.10241000 | 1.55386000  | 0.00836800  |
| O  | -2.11730200 | 0.63843900  | 0.04796200  |
| O  | -0.18379000 | -1.49973400 | -0.19530600 |
| C  | -0.01390100 | -2.24763900 | -1.43215100 |
| H  | -0.67318100 | -3.11386600 | -1.35465000 |
| H  | 1.02291700  | -2.56871200 | -1.53212400 |
| H  | -0.29246400 | -1.61791800 | -2.28280200 |
| Mg | -2.14312100 | -1.17480000 | 0.34062800  |
| C  | -1.24759500 | 2.58411300  | 1.15600300  |
| H  | -1.04149500 | 2.06316900  | 2.10112300  |
| C  | 0.67134500  | -0.38994400 | -0.04889600 |
| O  | -1.14622500 | 2.36690600  | -1.18943600 |
| C  | -1.33670800 | 1.66579900  | -2.40129300 |
| H  | -1.36273200 | 2.42097900  | -3.19189700 |
| H  | -0.50755100 | 0.96989900  | -2.61482600 |
| H  | -2.28000100 | 1.10769800  | -2.40510000 |
| C  | 2.12309600  | -0.56542300 | 0.08282800  |
| C  | 2.67526300  | 0.72443400  | 0.19793900  |
| C  | 4.86639400  | -0.24273900 | 0.38122700  |
| H  | 5.94078000  | -0.12689700 | 0.49342600  |
| C  | 4.31344200  | -1.52396900 | 0.29238500  |
| H  | 4.96148800  | -2.39453300 | 0.34451800  |
| C  | 2.93443200  | -1.70055100 | 0.14629000  |
| H  | 2.51440700  | -2.70171900 | 0.11118400  |
| C  | 1.55598400  | 1.73716300  | 0.19194400  |
| H  | 1.62588600  | 2.45833600  | -0.63356300 |
| H  | 1.55173500  | 2.32995600  | 1.11608100  |
| H  | -0.48216700 | 3.35989200  | 1.03926000  |
| C  | -2.63338500 | 3.23002100  | 1.19972500  |
| H  | -2.69635900 | 3.94689200  | 2.02642600  |
| H  | -2.83774600 | 3.76112900  | 0.26578600  |
| H  | -3.41076400 | 2.47364200  | 1.33686900  |
| C  | 4.04596000  | 0.89181600  | 0.34389100  |

|   |            |            |            |
|---|------------|------------|------------|
| H | 4.47819000 | 1.88520800 | 0.43725400 |
|---|------------|------------|------------|

Structure 7-intCO-III [B3LYP/6-31G(d)]

|    |             |             |             |
|----|-------------|-------------|-------------|
| Cl | 3.45185600  | -2.63589800 | -0.42538000 |
| C  | -0.38412300 | 0.92267500  | -0.09569800 |
| C  | 1.05765200  | 1.38090800  | -0.29018500 |
| O  | 1.60385300  | 0.82212400  | -1.38079600 |
| O  | 0.12699900  | -1.43751800 | -0.06703200 |
| C  | 0.00692000  | -2.40678900 | 1.00699600  |
| H  | 0.84380600  | -3.09413200 | 0.87847600  |
| H  | -0.93854500 | -2.94386100 | 0.93167600  |
| H  | 0.07195700  | -1.89989900 | 1.97469200  |
| Mg | 2.13695100  | -0.82039500 | -0.52144200 |
| C  | 1.27230000  | 2.89318000  | -0.17278600 |
| H  | 0.67551800  | 3.35414000  | -0.97010700 |
| C  | -0.77495900 | -0.37302900 | -0.04486200 |
| O  | 1.87832800  | 0.68379300  | 0.86804400  |
| C  | 1.57940800  | 0.94131000  | 2.23186300  |
| H  | 0.51445000  | 0.78198100  | 2.44770600  |
| H  | 2.17545100  | 0.25082400  | 2.83525000  |
| H  | 1.85129900  | 1.96822300  | 2.50394100  |
| C  | -2.23567700 | -0.50966700 | -0.07080500 |
| C  | -2.75817000 | 0.80112400  | -0.09824600 |
| C  | -4.98843800 | -0.08878200 | -0.14417500 |
| H  | -6.06370900 | 0.06414100  | -0.16798000 |
| C  | -4.47176800 | -1.38760100 | -0.14674500 |
| H  | -5.14965300 | -2.23603500 | -0.18081400 |
| C  | -3.09285900 | -1.61278800 | -0.11405000 |
| H  | -2.71305800 | -2.62868500 | -0.14891400 |
| C  | -1.61928900 | 1.79471400  | -0.13567400 |
| H  | -1.65179500 | 2.50393000  | 0.70363200  |
| H  | -1.65500100 | 2.40272900  | -1.05092100 |
| H  | 0.85757300  | 3.25985600  | 0.77582000  |
| C  | 2.73689000  | 3.30643900  | -0.32362800 |
| H  | 2.83288800  | 4.39735600  | -0.30503400 |
| H  | 3.35116100  | 2.89553100  | 0.48402700  |
| H  | 3.13681200  | 2.93643500  | -1.27101400 |
| C  | -4.12886600 | 1.01647500  | -1.12892100 |
| H  | -4.53168100 | 2.02626300  | -0.15192000 |

Structure 7-intCO-IV [B3LYP/6-31G(d)]

|    |             |             |             |
|----|-------------|-------------|-------------|
| Cl | 3.68061900  | -2.36757300 | -0.52711500 |
| C  | -0.41011200 | 0.85806000  | 0.01343600  |
| C  | 1.00979500  | 1.40877400  | -0.09902700 |
| O  | 1.63318000  | 0.99397300  | -1.20916600 |
| O  | 0.20748800  | -1.48010800 | -0.18764800 |
| C  | 0.18193400  | -2.45489500 | 0.89419700  |
| H  | 0.99360500  | -3.15251500 | 0.68477700  |
| H  | -0.77584000 | -2.97534300 | 0.90697800  |
| H  | 0.34801400  | -1.94297500 | 1.84630100  |
| Mg | 2.15938100  | -0.72092200 | -0.50219400 |
| C  | 1.16786700  | 2.90775000  | 0.17866500  |
| H  | 0.60802900  | 3.19280300  | 1.07851600  |
| C  | -0.73374200 | -0.45309900 | -0.07023200 |
| O  | 1.71992800  | 0.56656600  | 1.09650300  |
| C  | 2.78662200  | 1.15214200  | 1.84216900  |
| H  | 2.41989800  | 1.95881200  | 2.48677600  |
| H  | 3.20339800  | 0.36195100  | 2.47390900  |
| H  | 3.58649700  | 1.54086900  | 1.19752600  |
| C  | -2.18163700 | -0.67232400 | -0.06043100 |
| C  | -2.77647200 | 0.59586300  | 0.09558700  |
| C  | -4.95052500 | -0.42117900 | 0.02154100  |
| H  | -6.03285400 | -0.33453800 | 0.05760600  |
| C  | -4.36088400 | -1.67595300 | -0.15940300 |
| H  | -4.99092000 | -2.55466400 | -0.27132300 |
| C  | -2.97109100 | -1.81570700 | -0.20665000 |
| H  | -2.52880400 | -2.79205700 | -0.37980800 |
| C  | -1.69475200 | 1.65141600  | 0.13916400  |
| H  | -1.71722700 | 2.23432000  | 1.07095200  |
| H  | -1.82214800 | 2.37233000  | -0.67839600 |
| H  | 2.22582700  | 3.09403600  | 0.38252500  |
| C  | 0.77252900  | 3.78056500  | -1.02095800 |
| H  | 1.00575600  | 4.83063800  | -0.81364500 |
| H  | 1.33016400  | 3.46638900  | -1.90658000 |
| H  | -0.29442600 | 3.72073800  | -1.25562700 |
| C  | -4.15745100 | 0.72715300  | 0.14042700  |
| H  | -4.62016100 | 1.70416200  | 0.25837700  |

Structure 7' I [B3LYP/6-31G(d)]

|   |             |             |             |
|---|-------------|-------------|-------------|
| C | -0.75846700 | -0.24494500 | -0.04085000 |
| C | -2.19880400 | -0.15887300 | -0.07729000 |

|                                        |             |             |             |                                          |             |             |             |
|----------------------------------------|-------------|-------------|-------------|------------------------------------------|-------------|-------------|-------------|
| O                                      | -2.90558800 | 0.84386800  | -0.15494000 | H                                        | -6.10182900 | -0.36677800 | 0.16334200  |
| O                                      | -0.13408700 | 2.17743700  | -0.46221600 | C                                        | -4.29850000 | 0.77752100  | 0.02615200  |
| C                                      | -0.66855200 | 2.88446600  | 0.64558000  | H                                        | -2.49119200 | -2.72026400 | 0.05105200  |
| H                                      | -0.76204800 | 3.93360500  | 0.33562400  | H                                        | -4.81242800 | 1.73839000  | 0.03647800  |
| H                                      | 0.00342000  | 2.82842600  | 1.51670000  | C                                        | -1.91314000 | 1.74952300  | -0.13822800 |
| H                                      | -1.65794900 | 2.50130000  | 0.91932400  | Mg                                       | 2.16063800  | -0.72729500 | 0.45702300  |
| C                                      | 0.15497900  | 0.84496100  | -0.20252900 | Cl                                       | 2.22911800  | -0.79035300 | 2.78323200  |
| O                                      | -2.80082100 | -1.41087600 | -0.00840700 | H                                        | -2.07932100 | 2.81884100  | -0.11322400 |
| C                                      | -4.21798500 | -1.38387800 | -0.02565300 |                                          |             |             |             |
| H                                      | -4.53862800 | -2.42829900 | 0.03894900  |                                          |             |             |             |
| H                                      | -4.62414100 | -0.81596100 | 0.82027200  | Structure 7'·EtMgCl_II [B3LYP/6-31G(d)]  |             |             |             |
| H                                      | -4.60402400 | -0.93149500 | -0.94699900 | C                                        | -0.75122100 | 1.11502700  | -0.19446200 |
| C                                      | 1.35766900  | -1.10576400 | 0.08669400  | C                                        | 0.50144700  | 1.79389600  | -0.24171400 |
| C                                      | 1.46036600  | 0.33826000  | -0.13000500 | O                                        | 1.63706700  | 1.26034500  | -0.22715800 |
| C                                      | 2.73595500  | 0.94734600  | -0.23258600 | O                                        | 0.13699100  | -1.22257000 | -0.41665900 |
| C                                      | 3.87438600  | 0.17479500  | -0.11678400 | C                                        | 0.08047300  | -1.88826600 | -1.69357800 |
| H                                      | 4.85786700  | 0.63805800  | -0.19294700 | H                                        | 0.11564700  | -1.15152900 | -2.50411400 |
| C                                      | 3.78276100  | -1.23424600 | 0.10198200  | H                                        | -0.84319400 | -2.46857000 | -1.76826600 |
| H                                      | 4.69876000  | -1.81860900 | 0.18826200  | H                                        | 0.95109300  | -2.54359600 | -1.74770300 |
| C                                      | 2.55567800  | -1.85997100 | 0.20048100  | C                                        | 3.48231600  | -1.59020400 | -1.16864200 |
| H                                      | 2.80610200  | 2.02076500  | -0.40442000 | H                                        | 3.19532300  | -2.34214800 | -2.10724900 |
| H                                      | 2.50245000  | -2.93756000 | 0.36356800  | H                                        | 3.39288300  | -2.69132300 | -1.11671400 |
| C                                      | -0.00057300 | -1.44298500 | 0.13684700  | C                                        | -0.91179800 | -0.30514300 | -0.21937100 |
| H                                      | -0.42232200 | -2.42865800 | 0.29084800  | O                                        | 0.41789000  | 3.14425100  | -0.30753100 |
|                                        |             |             |             | C                                        | 1.65944300  | 3.85152600  | -0.27733300 |
|                                        |             |             |             | H                                        | 1.38931000  | 4.90954700  | -0.29787200 |
| Structure 7'·II [B3LYP/6-31G(d)]       |             |             |             | H                                        | 2.22234400  | 3.61970900  | 0.63144400  |
| C                                      | -0.67478000 | -0.61196300 | -0.01747000 | H                                        | 2.27687300  | 3.60186600  | -1.14568800 |
| C                                      | -2.09228900 | -0.90201600 | -0.01643200 | C                                        | 4.97027400  | -1.23016200 | -0.98484500 |
| O                                      | -2.61959200 | -2.00474100 | 0.09829900  | H                                        | 5.14171400  | -0.14877200 | -1.09545600 |
| O                                      | -0.54743700 | 1.88628100  | -0.43731500 | H                                        | 5.32819400  | -1.49645800 | 0.01952100  |
| C                                      | -0.97215800 | 2.54947300  | 0.73904400  | H                                        | 5.65306100  | -1.72537800 | -1.70195200 |
| H                                      | -1.32095500 | 3.54664300  | 0.43870300  | C                                        | -2.26700400 | -0.61181800 | -0.08106200 |
| H                                      | -0.14691200 | 2.66078200  | 1.45946200  | C                                        | -2.97441000 | 0.66649100  | 0.02634700  |
| H                                      | -1.79898300 | 2.01612800  | 1.22637000  | C                                        | -5.06674000 | -0.54291500 | 0.22304500  |
| C                                      | 0.00738200  | 0.63174200  | -0.19981100 | H                                        | -6.14894700 | -0.55009400 | 0.34094800  |
| O                                      | -2.88863600 | 0.22521000  | -0.16078100 | C                                        | -4.37056000 | -1.78698200 | 0.12450100  |
| C                                      | -4.28232900 | -0.03960300 | -0.18292700 | H                                        | -4.93591100 | -2.71559600 | 0.17956000  |
| H                                      | -4.76938600 | 0.93232900  | -0.30610200 | C                                        | -3.00170000 | -1.82751100 | -0.02279800 |
| H                                      | -4.55372300 | -0.70186900 | -1.01345100 | H                                        | -2.48334500 | -2.78355000 | -0.06751900 |
| H                                      | -4.62020900 | -0.51360100 | 0.74647800  | C                                        | -2.04005300 | 1.70517300  | -0.04378900 |
| C                                      | 1.56920100  | -1.04642000 | 0.08293000  | C                                        | -4.38696800 | 0.65423700  | 0.18104400  |
| C                                      | 1.38803900  | 0.38866600  | -0.14190300 | H                                        | -4.92630200 | 1.59722200  | 0.26695700  |
| C                                      | 2.52095600  | 1.23109800  | -0.26682000 | Mg                                       | 2.12219000  | -0.67629500 | 0.23018700  |
| C                                      | 3.78878100  | 0.69278400  | -0.16516800 | Cl                                       | 2.31546300  | -0.83755700 | 2.54428400  |
| H                                      | 4.66325300  | 1.33617300  | -0.26050700 | H                                        | -2.23445400 | 2.76626900  | 0.04573700  |
| C                                      | 3.97362200  | -0.70515200 | 0.06106200  |                                          |             |             |             |
| H                                      | 4.98606500  | -1.10166500 | 0.13589800  | Structure 7'·EtMgCl_III [B3LYP/6-31G(d)] |             |             |             |
| C                                      | 2.89097400  | -1.55486100 | 0.18022200  | C                                        | 0.70013900  | 1.21564300  | -0.03386300 |
| H                                      | 2.38228800  | 2.29654200  | -0.44813400 | O                                        | -0.52343300 | 1.94837400  | -0.00329500 |
| H                                      | 3.04851900  | -2.62135300 | 0.34806100  | C                                        | -1.67858400 | 1.46244000  | -0.05951000 |
| C                                      | 0.30067800  | -1.63713500 | 0.15446900  | O                                        | -0.27883200 | -1.00467000 | -0.67391800 |
| H                                      | 0.06689300  | -2.68377800 | 0.30842100  | C                                        | -0.23618200 | -1.39436200 | -2.06417300 |
|                                        |             |             |             | H                                        | 0.64253900  | -2.02117000 | -2.24164900 |
| Structure 7'·EtMgCl_I [B3LYP/6-31G(d)] |             |             |             | H                                        | -0.18637300 | -0.50246300 | -2.69776500 |
| C                                      | -0.63696000 | 1.11679300  | -0.19505800 | H                                        | -1.15919500 | -1.93961100 | -2.26454000 |
| C                                      | 0.63606900  | 1.75789300  | -0.21444200 | C                                        | -2.34436500 | -1.04733400 | -2.29908700 |
| O                                      | 1.75353700  | 1.19568900  | -0.11495300 | C                                        | 0.79869000  | -0.18841700 | -0.28605100 |
| O                                      | 0.19198100  | -1.25042100 | -0.25134900 | O                                        | -0.38412300 | 3.29183000  | 0.10414300  |
| C                                      | 0.16625300  | -2.00363500 | -1.47914700 | C                                        | -1.59713100 | 4.04188200  | 0.19881600  |
| H                                      | 1.03988800  | -2.65735500 | -1.46455800 | H                                        | -1.28531400 | 5.08429800  | 0.29332600  |
| H                                      | 0.21921400  | -1.32533700 | -2.33799700 | H                                        | -2.21321200 | 3.90896200  | -0.69533200 |
| H                                      | -0.75347600 | -2.59226200 | -1.53590700 | H                                        | -2.18070200 | 3.73940400  | 1.07357700  |
| C                                      | 3.61550500  | -1.73505800 | -0.77201400 | H                                        | -1.51825100 | -0.59212400 | 2.87254900  |
| C                                      | -0.83878700 | -0.29767600 | -0.15487500 | C                                        | -2.39070600 | -2.55260000 | 2.62682400  |
| O                                      | 0.59579900  | 3.10465800  | -0.35350500 | H                                        | -3.22260800 | -3.05474600 | 2.11211100  |
| C                                      | 1.85487700  | 3.77864800  | -0.30039500 | H                                        | -1.47261600 | -3.06482000 | 2.30347600  |
| H                                      | 1.61763100  | 4.84075900  | -0.39226800 | H                                        | -2.50786300 | -2.78054300 | 3.70376100  |
| H                                      | 2.36615200  | 3.58332300  | 0.64672200  | H                                        | -3.25638700 | -0.57708400 | 2.70944200  |
| H                                      | 2.50571400  | 3.46403100  | -1.12195000 | C                                        | 2.89247600  | 0.62894000  | 0.17094200  |
| H                                      | 4.58449600  | -1.62784300 | -0.25301800 | C                                        | 2.13484300  | -0.57742300 | -0.16890100 |
| C                                      | 3.80539900  | -1.27931900 | -2.23186600 | C                                        | 2.81249700  | -1.81937000 | -0.30401100 |
| H                                      | 2.88789200  | -1.40521600 | -2.82717700 | C                                        | 4.17560700  | -1.87203500 | -0.11323500 |
| H                                      | 4.05952400  | -0.21089400 | -2.29156200 | H                                        | 4.69850400  | -2.82221000 | -0.20650000 |
| H                                      | 4.60107200  | -1.81825700 | -2.78127600 | C                                        | 4.92063700  | -0.69880700 | 0.21949000  |
| C                                      | 3.43930700  | -2.82673100 | -0.76833200 | H                                        | 5.99652000  | -0.77915700 | 0.36503200  |
| C                                      | -2.88050100 | 0.74229800  | -0.06031800 | C                                        | 4.29631300  | 0.52071600  | 0.36292500  |
| C                                      | -2.20768600 | -0.55918100 | -0.06680300 | H                                        | 2.25385200  | -2.72467100 | -0.53431200 |
| C                                      | -2.98125900 | -1.74894500 | 0.01975200  | H                                        | 4.87367600  | 1.40765100  | 0.62277100  |
| C                                      | -4.35356000 | -1.66260700 | 0.09842700  | C                                        | 2.00717100  | 1.71034000  | 0.24604300  |
| H                                      | -4.94868100 | -2.57087200 | 0.17483100  | Mg                                       | -2.16791800 | -0.51588100 | 0.23113100  |
| C                                      | -5.01556600 | -0.39615500 | 0.09782700  | Cl                                       | -3.69639200 | -1.13601000 | -1.44572800 |



|                                         |             |             |             |                                        |              |             |             |
|-----------------------------------------|-------------|-------------|-------------|----------------------------------------|--------------|-------------|-------------|
| H                                       | 2.24408500  | 2.73094900  | 0.51854400  | O                                      | 0.02173900   | -1.58750900 | -0.28037900 |
|                                         |             |             |             | C                                      | 0.16857100   | -2.35894900 | -1.49041100 |
| Structure 7'-EtMgCl_IV [B3LYP/6-31G(d)] |             |             |             | H                                      | -0.55072200  | -3.18226600 | -1.43541500 |
| C                                       | 0.55805400  | 1.05915200  | -0.38612000 | H                                      | 1.18670800   | -2.75243200 | -1.54720500 |
| C                                       | -0.72839700 | 1.65781100  | -0.53577200 | H                                      | -0.03176800  | -1.72572500 | -2.36148300 |
| O                                       | -1.83202700 | 1.06718500  | -0.45218300 | Mg                                     | -1.89062300  | -0.86472900 | 0.02759000  |
| O                                       | -0.20893500 | -1.33076000 | -0.38840900 | C                                      | -1.58219300  | 0.82750600  | 1.53733200  |
| C                                       | -0.14301600 | -2.05075800 | -1.63861900 | C                                      | -1.36083200  | -0.13598800 | 2.05687900  |
| H                                       | 0.79228100  | -2.61638100 | -1.68575400 | H                                      | 0.90764000   | -0.46784000 | -0.21395800 |
| H                                       | -0.18913100 | -1.34556700 | -2.47542400 | O                                      | -1.14044900  | 2.62307600  | -0.43322300 |
| H                                       | -1.00899300 | -2.71321000 | -1.66377500 | C                                      | -2.26837600  | 3.10824000  | -1.15029500 |
| C                                       | -2.21919500 | -0.69413800 | 2.55796300  | H                                      | -2.26061900  | 4.19225400  | -1.00127500 |
| H                                       | -1.63007800 | -1.52927700 | 2.97630700  | H                                      | -2.19226000  | 2.87942500  | -2.21845400 |
| H                                       | -3.25399800 | -0.90405900 | 2.88064200  | H                                      | -2.320895600 | 2.69228500  | -0.77550400 |
| C                                       | 0.78635400  | -0.34639600 | -0.25526700 | C                                      | 2.28934500   | -0.51044800 | 0.03615800  |
| O                                       | -0.71617600 | 2.98919200  | -0.78482400 | C                                      | 2.71968400   | 0.88655700  | 0.08282700  |
| C                                       | -1.99525000 | 3.62283600  | -0.86240500 | C                                      | 4.99524100   | 0.13135900  | 0.47083400  |
| H                                       | -1.78372700 | 4.67902900  | -1.04258300 | H                                      | 6.04790000   | 0.35538800  | 0.63836300  |
| H                                       | -2.59088600 | 3.20943300  | -1.68162800 | C                                      | 4.56707800   | -1.22191600 | 0.44191300  |
| H                                       | -2.55166700 | 3.50053800  | 0.07159900  | H                                      | 5.29598000   | -2.01671400 | 0.59569700  |
| C                                       | -1.75112600 | 0.61058300  | 3.23162100  | C                                      | 3.23642800   | -1.54328100 | 0.22816100  |
| H                                       | -0.70834400 | 0.84725300  | 2.97766500  | H                                      | 2.92125300   | -2.58663400 | 0.22597100  |
| H                                       | -2.35073900 | 1.47419400  | 2.90547100  | C                                      | 1.58628700   | 1.71365700  | -0.10662500 |
| H                                       | -1.80727900 | 0.59731700  | 4.33703100  | H                                      | -0.80524700  | 1.49663900  | 1.90466300  |
| C                                       | 2.15139400  | -0.56794000 | -0.06168200 | C                                      | -2.97826300  | 1.32769500  | 1.91711800  |
| C                                       | 2.79313200  | 0.74841900  | -0.06905000 | H                                      | -3.12646700  | 1.40983200  | 3.00653900  |
| C                                       | 4.93304700  | -0.33078400 | 0.29849500  | H                                      | -3.14772600  | 2.32641000  | 1.49783000  |
| H                                       | 6.01050500  | -0.27233100 | 0.44284300  | H                                      | -3.78329100  | 0.67708700  | 1.54457200  |
| C                                       | 4.30066400  | -1.61234900 | 0.30227700  | C                                      | 4.08795000   | 1.16474000  | 0.29504100  |
| H                                       | 4.90874100  | -2.50204000 | 0.45613200  | H                                      | 4.42738000   | 2.20072000  | 0.32672800  |
| C                                       | 2.93995800  | -1.73501600 | 0.12711900  | H                                      | 1.56603500   | 2.79641400  | -0.11174800 |
| H                                       | 2.46728100  | -2.71512900 | 0.15388700  |                                        |              |             |             |
| C                                       | 1.81211700  | 1.72628200  | -0.27040800 | Structure 7'-TSOMe-I [B3LYP/6-31G(d)]  |              |             |             |
| C                                       | 4.19940100  | 0.82171100  | 0.12179600  | Cl                                     | -3.87879400  | -2.21471500 | -0.02044800 |
| H                                       | 4.69176900  | 1.79384700  | 0.12673900  | C                                      | 0.24304600   | 1.15785500  | -0.14751300 |
| Mg                                      | -2.12618000 | -0.77672500 | 0.41777100  | C                                      | -1.02486000  | 1.71519500  | -0.12866900 |
| Cl                                      | -3.59999400 | -2.01435000 | -0.93318100 | O                                      | -2.14445700  | 1.05900300  | -0.04970600 |
| H                                       | 1.95261000  | 2.79960700  | -0.28469900 | O                                      | -0.36876200  | -1.17324700 | -0.99095400 |
|                                         |             |             |             | C                                      | -0.07969100  | -0.97275100 | -2.38136500 |
| Structure 7'-TSCO-I [B3LYP/6-31G(d)]    |             |             |             | H                                      | -0.74128100  | -1.64536400 | -2.93534200 |
| Cl                                      | -3.68016700 | -2.34149900 | 0.46752400  | H                                      | 0.96663500   | -1.22346500 | -2.57439600 |
| C                                       | 0.37847100  | 0.82751000  | -0.38795600 | H                                      | -0.26139900  | 0.06797600  | -2.67052600 |
| C                                       | -1.02944200 | 1.26153500  | -0.52174000 | Mg                                     | -2.03598500  | -0.87316400 | 0.06407200  |
| O                                       | -1.85993000 | 0.56174000  | -1.26687200 | C                                      | -0.30374100  | -1.15627700 | 1.61622100  |
| O                                       | -0.17684100 | -1.60733100 | -0.17868700 | H                                      | 0.34835400   | -2.03120600 | 1.56112400  |
| C                                       | -0.09888300 | -2.46953200 | -1.33392200 | H                                      | -1.29849000  | -1.58692400 | 1.91833000  |
| H                                       | -0.85487200 | -3.24994500 | -1.20276000 | C                                      | 0.44670200   | -0.30418500 | -0.06444300 |
| H                                       | 0.89780000  | -2.91478200 | -1.38606400 | O                                      | -1.10585900  | 3.08451500  | -0.16300200 |
| H                                       | -0.29232800 | -1.88975300 | -2.24291800 | C                                      | -2.41168700  | 3.63979700  | -0.14445800 |
| Mg                                      | -2.05192800 | -0.78922800 | 0.10280000  | H                                      | -2.26981500  | 4.72342600  | -0.19307100 |
| C                                       | -1.75056600 | 1.01797000  | 1.49325500  | H                                      | -3.00925300  | 3.30631100  | -1.00107800 |
| H                                       | -1.99072400 | 0.07583400  | 2.04890000  | C                                      | -2.95379800  | 3.37928400  | 0.77180000  |
| H                                       | -2.70399900 | 1.56247200  | 1.43347400  | H                                      | 0.12045800   | -0.18556200 | 2.70955400  |
| C                                       | 0.75874900  | -0.52784400 | -0.21738000 | H                                      | 1.14738500   | 0.15000400  | 2.53354100  |
| O                                       | -1.14086000 | 2.63348200  | -0.58645600 | H                                      | -0.51515200  | 0.70945200  | 2.71742300  |
| C                                       | -2.38441500 | 3.12981400  | -1.06014800 | H                                      | 0.07649100   | -0.63361700 | 3.71388000  |
| H                                       | -2.28856100 | 4.21937700  | -1.04854400 | C                                      | 1.87260600   | -0.49590500 | -0.08593800 |
| H                                       | -2.59479600 | 2.78013900  | -2.07510200 | C                                      | 2.50958400   | 0.82768600  | -0.07118600 |
| H                                       | -3.21460500 | 2.82921700  | -0.40946600 | C                                      | 2.64395800   | -1.67007400 | -0.10161800 |
| C                                       | -0.72935300 | 1.76838400  | 2.33740300  | H                                      | 2.14706800   | -2.64064800 | -0.12780000 |
| H                                       | 0.21016400  | 1.20919300  | 2.40412700  | C                                      | 4.02861900   | -1.59813200 | -0.08523700 |
| H                                       | -0.49381300 | 2.73256700  | 1.87411400  | H                                      | 4.63216300   | -2.50288300 | -0.10157000 |
| H                                       | -1.08048300 | 1.96562400  | 3.36312000  | C                                      | 4.66266300   | -0.31729400 | -0.03493700 |
| C                                       | 2.14754200  | -0.62011700 | -0.03109400 | H                                      | 5.75203900   | -0.27292000 | -0.00443200 |
| C                                       | 2.64438100  | 0.75307200  | -0.11315600 | C                                      | 3.94338700   | 0.85554900  | -0.01982100 |
| C                                       | 4.89934400  | -0.08150700 | 0.22666200  | H                                      | 4.46114400   | 1.81397500  | 0.02269700  |
| H                                       | 5.96812900  | 0.10180500  | 0.32805400  | C                                      | 1.54124600   | 1.81510000  | -0.11967400 |
| C                                       | 4.40847100  | -1.41074800 | 0.31927600  | H                                      | 1.68810400   | 2.88654500  | -0.06804000 |
| H                                       | 5.10730200  | -2.22704700 | 0.49797800  |                                        |              |             |             |
| C                                       | 3.05589100  | -1.68162200 | 0.19365800  | Structure 7'-TSOMe-II [B3LYP/6-31G(d)] |              |             |             |
| H                                       | 2.69420700  | -2.70548200 | 0.28659000  | Cl                                     | 3.82129700   | -2.13418200 | 0.08769800  |
| C                                       | 1.54271600  | 1.61868200  | -0.31283700 | C                                      | -0.24288800  | 1.28931700  | -0.03805600 |
| C                                       | 4.03247700  | 0.97924800  | 0.01593100  | C                                      | 1.02221900   | 1.84561400  | -0.04094500 |
| H                                       | 4.41914300  | 1.99709300  | -0.04567800 | O                                      | 2.14678900   | 1.19332700  | 0.06578400  |
| H                                       | 1.57216400  | 2.69769100  | -0.39892400 | O                                      | 0.34983400   | -0.93689500 | 1.07119700  |
|                                         |             |             |             | C                                      | 0.09701000   | -0.56437600 | 2.43503200  |
| Structure 7'-TSCO-II [B3LYP/6-31G(d)]   |             |             |             | H                                      | 0.75388700   | -1.18712000 | 3.04976900  |
| Cl                                      | -3.46834000 | -2.48109000 | 0.31699500  | H                                      | -0.95063500  | -0.75958400 | 2.67665600  |
| C                                       | 0.46933900  | 0.87721800  | -0.30147100 | O                                      | 0.31497000   | 0.49721300  | 2.59039400  |
| C                                       | -0.95743300 | 1.25341300  | -0.44933800 | Mg                                     | 2.02252600   | -0.73843200 | -0.01085100 |
| O                                       | -1.72827700 | 0.56454400  | -1.26762900 | C                                      | 0.30975000   | -1.04953700 | -1.58319700 |

|                                 |             |             |             |                                        |             |             |             |
|---------------------------------|-------------|-------------|-------------|----------------------------------------|-------------|-------------|-------------|
| H                               | 1.29471000  | -0.80796900 | -2.05602700 | H                                      | 0.45537200  | 3.83619500  | -0.75659300 |
| C                               | -0.45377700 | -0.17283200 | 0.07617800  | H                                      | 0.44688000  | 3.75506500  | 1.03183800  |
| O                               | 1.10552100  | 3.20847400  | -0.20155200 | H                                      | 1.96708800  | 4.10277800  | 0.15752800  |
| C                               | 2.41101900  | 3.76173100  | -0.22321500 | Structure 9·EtMgCl_I [B3LYP/6-31G(d)]  |             |             |             |
| H                               | 2.27086100  | 4.83896200  | -0.35418700 | Cl                                     | -4.13435000 | -0.99126100 | -1.38080000 |
| H                               | 2.95228500  | 3.57150800  | 0.71135000  | C                                      | 0.59824300  | 0.76364500  | -0.27115200 |
| H                               | 3.01093800  | 3.36508800  | -1.05066300 | C                                      | 1.85192300  | 1.29294200  | -0.00741800 |
| C                               | -1.88239700 | -0.36204400 | 0.11306300  | C                                      | 3.00387200  | 0.48433000  | 0.10452400  |
| C                               | -2.50660400 | 0.93124400  | -0.19115400 | C                                      | 2.86307200  | -0.92797300 | -0.07530100 |
| C                               | -2.66359400 | -1.50079900 | 0.36383100  | C                                      | 1.58001000  | -1.46515800 | -0.35823500 |
| H                               | -2.17922500 | -2.44017500 | 0.63114700  | C                                      | -0.56451700 | 1.67450600  | -0.34589200 |
| C                               | -4.04898200 | -1.43053200 | 0.29281900  | O                                      | -1.74639300 | 1.34477400  | -0.22065100 |
| H                               | -4.66046200 | -2.30581900 | 0.49940400  | O                                      | -0.77932100 | -1.14770200 | -0.74866900 |
| C                               | -4.66729300 | -0.19211900 | -0.06011000 | C                                      | -0.88148500 | -2.47420300 | -1.31338300 |
| H                               | -5.75486700 | -0.15228500 | -0.13454500 | H                                      | 1.94781200  | 2.36525800  | 0.12231500  |
| C                               | -3.93779000 | 0.94967900  | -0.30168100 | H                                      | -1.91789700 | -2.55840200 | -1.64108300 |
| H                               | -4.44536900 | 1.87917300  | -0.55978200 | H                                      | -0.65423000 | -3.23139900 | -0.55658100 |
| C                               | -1.53512100 | 1.91331400  | -0.28400600 | H                                      | -0.19940900 | -2.56297200 | -2.16355400 |
| H                               | -0.39081700 | -0.46133200 | -2.17765300 | Mg                                     | -2.64796800 | -0.44988600 | 0.28669600  |
| C                               | 0.02885100  | -2.54471300 | -1.71247800 | C                                      | -2.47390500 | -0.88587900 | 2.35953500  |
| H                               | 0.79375200  | -3.16174900 | -1.22227100 | O                                      | 0.46900200  | -0.65693500 | -0.45082300 |
| H                               | -0.93696700 | -2.78401900 | -1.25440800 | C                                      | -0.22892500 | 2.94665500  | -0.55230200 |
| H                               | -0.02518600 | -2.87543500 | -2.76279800 | C                                      | -1.31268000 | 3.90265500  | -0.57993600 |
| H                               | -1.67981000 | 2.96287700  | -0.50696100 | H                                      | -0.83520700 | 4.86367800  | -0.76682900 |
| Structure 9_I [B3LYP/6-31G(d)]  |             |             |             | H                                      | -2.01354100 | 3.65229400  | -1.37861200 |
| C                               | 4.27054400  | 0.17375800  | 0.07036100  | H                                      | -1.83633100 | 3.90731700  | 0.37859800  |
| C                               | 3.21643600  | 1.06053500  | 0.05710100  | H                                      | -1.49625400 | -0.53690600 | -2.73637000 |
| C                               | 1.87591500  | 0.59170100  | 0.01858600  | H                                      | 1.49098700  | -2.53623800 | -0.49390900 |
| C                               | 1.64484400  | -0.81917500 | -0.00581800 | C                                      | 4.01638500  | -1.74773100 | 0.03713100  |
| C                               | 2.75248200  | -1.70850200 | 0.00840200  | H                                      | 3.91520400  | -2.82162200 | -0.09626200 |
| C                               | 4.04040700  | -1.22432900 | 0.04559100  | C                                      | 5.24567900  | -1.19124800 | 0.31358100  |
| H                               | 0.95959000  | 2.53786100  | 0.00474400  | H                                      | 6.12045600  | -1.82991200 | 0.39851600  |
| H                               | 5.29078900  | 0.54732100  | 0.10003400  | C                                      | 5.38527500  | 0.20818300  | 0.49018300  |
| H                               | 3.39878600  | 2.13244300  | 0.07568900  | H                                      | 6.36304200  | 0.62775400  | 0.70743500  |
| C                               | 0.76370500  | 1.47194100  | -0.00171300 | C                                      | 4.28599600  | 1.02863000  | 0.38798500  |
| C                               | 0.30776500  | -1.27639300 | -0.04200200 | H                                      | 4.38128100  | 2.10305100  | 0.52292200  |
| H                               | 2.56283300  | -2.77899300 | -0.01085500 | C                                      | -3.57976200 | -0.31859000 | 3.27419100  |
| H                               | 4.88347500  | -1.90929500 | 0.05611600  | H                                      | -3.62323900 | 0.77953300  | 3.23273600  |
| C                               | -0.77722500 | -0.41938100 | -0.04684900 | H                                      | -4.57444700 | -0.67969000 | 2.97997400  |
| C                               | -0.53640700 | 0.99974000  | -0.03536900 | H                                      | -3.45141800 | -0.58437900 | 4.33305400  |
| H                               | 0.10431400  | -2.34239500 | -0.06529000 | H                                      | -2.44277300 | -1.98015800 | 2.49720200  |
| C                               | -2.11487400 | -1.09228300 | -0.06611200 | Structure 9·EtMgCl_II [B3LYP/6-31G(d)] |             |             |             |
| O                               | -3.15531800 | -0.28025100 | 0.20093100  | Cl                                     | -4.30539600 | -1.07850000 | -1.13196300 |
| O                               | -2.25286300 | -2.28451700 | -0.27603500 | C                                      | 0.46244400  | 0.74476600  | -0.30574700 |
| C                               | -4.43797000 | -0.92388300 | 0.20666100  | C                                      | 1.72634400  | 1.29018800  | -0.14231600 |
| H                               | -4.64976500 | -1.37266600 | -0.76761800 | C                                      | 2.88973700  | 0.49329600  | -0.07597200 |
| H                               | -4.47457900 | -1.70599400 | 0.96997800  | C                                      | 2.74946800  | -0.92537500 | -0.19474400 |
| H                               | -5.15608400 | -0.13420900 | 0.43048700  | C                                      | 1.45505500  | -1.47998500 | -0.37272600 |
| O                               | -1.62300400 | 1.81211500  | -0.07881200 | C                                      | -0.70868300 | 1.64682200  | -0.34168400 |
| C                               | -1.42144100 | 3.21618600  | -0.08943000 | O                                      | -1.88090200 | 1.31398600  | -0.15056800 |
| H                               | -0.90929300 | 3.55683500  | 0.81990900  | O                                      | -0.92657000 | -1.19367300 | -0.62062400 |
| H                               | -0.84637100 | 3.53459200  | -0.96885400 | C                                      | -1.04993000 | -2.53936000 | -1.13393000 |
| H                               | -2.41929600 | 3.65624500  | -0.12946700 | H                                      | 1.82161400  | 2.36700000  | -0.05816500 |
| Structure 9_II [B3LYP/6-31G(d)] |             |             |             | H                                      | -2.10228200 | -2.64123600 | -1.40007700 |
| C                               | -4.20092600 | -0.26283300 | 0.00024500  | H                                      | -0.77374400 | -3.26913100 | -0.36652100 |
| C                               | -3.28151300 | 0.76285900  | 0.02114700  | H                                      | -0.41647100 | -2.65247900 | -2.01807000 |
| C                               | -1.88766600 | 0.48853000  | 0.00792200  | Mg                                     | -2.76495300 | -0.45471900 | 0.45449700  |
| C                               | -1.45983300 | -0.87540100 | -0.02738200 | C                                      | -2.55777300 | -0.77246300 | 2.54599900  |
| C                               | -2.43163100 | -1.91083700 | -0.04871800 | O                                      | 0.33347400  | -0.68246800 | -0.42363800 |
| C                               | -3.77583700 | -1.61376700 | -0.03484700 | C                                      | -0.39306800 | 2.91576500  | -0.59478200 |
| H                               | -1.25618200 | 2.54581300  | 0.07541100  | C                                      | -1.48352600 | 3.86417600  | -0.59161600 |
| H                               | -5.26388700 | -0.03638800 | 0.01036600  | H                                      | -1.02250300 | 4.82352100  | -0.82315000 |
| H                               | -3.61328100 | 1.79813100  | 0.04820000  | H                                      | -2.22031900 | 3.59154200  | -1.34968300 |
| C                               | -0.91210700 | 1.51872000  | 0.03407000  | H                                      | -1.96026800 | 3.88772200  | 0.39078100  |
| C                               | -0.06947100 | -1.14276900 | -0.04225300 | H                                      | -2.50986000 | -1.85566400 | 2.74925900  |
| H                               | -2.09356700 | -2.94413600 | -0.07580800 | H                                      | 1.36607700  | -2.55600000 | -0.46101100 |
| H                               | -4.51360600 | -2.41095000 | -0.05093000 | C                                      | 3.91448700  | -1.73347400 | -0.12875900 |
| C                               | 0.87869100  | -0.13750000 | -0.03350300 | H                                      | 3.81389300  | -2.81215200 | -0.21603900 |
| C                               | 0.44046700  | 1.23241700  | 0.01459600  | C                                      | 5.15453700  | -1.15969400 | 0.04564500  |
| H                               | 0.26619600  | -2.17369100 | -0.07058500 | H                                      | 6.03841400  | -1.78946300 | 0.09570600  |
| C                               | 2.32799400  | -0.48727500 | -0.12028700 | C                                      | 5.29350800  | 0.24607100  | 0.16193500  |
| O                               | 2.54996600  | -1.76624600 | 0.29239600  | H                                      | 6.27982900  | 0.67930400  | 0.29890200  |
| O                               | 3.21993500  | 0.22929800  | -0.52026100 | C                                      | 4.18295700  | 1.05548600  | 0.10263700  |
| C                               | 3.90881700  | -2.20885900 | 0.17653500  | H                                      | 4.27778400  | 2.13472400  | 0.19161500  |
| H                               | 4.24367100  | -2.16679500 | -0.86381900 | C                                      | -1.36504100 | -0.09027700 | 3.24590800  |
| H                               | 4.57022600  | -1.58500600 | 0.78384400  | H                                      | -0.40086300 | -0.41583500 | 2.82803300  |
| H                               | 3.91274900  | -3.23753200 | 0.53936200  | H                                      | -1.39692800 | 1.00386700  | 3.13613000  |
| O                               | 1.41236400  | 2.17432200  | 0.06718200  | H                                      | -1.31430000 | -0.28942600 | 4.32966300  |
| C                               | 1.03305300  | 3.53963800  | 0.12858300  | H                                      | -3.48692900 | -0.45003700 | 3.04386000  |

|                                         |             |             |             |                                      |             |             |             |
|-----------------------------------------|-------------|-------------|-------------|--------------------------------------|-------------|-------------|-------------|
| Structure 9-EtMgCl_III [B3LYP/6-31G(d)] |             |             |             | C                                    | -0.30603500 | 0.92146100  | 0.06770500  |
| Cl                                      | -4.33339800 | -0.52463000 | -1.20826500 | C                                    | -1.60297100 | 1.39533000  | -0.14476600 |
| C                                       | 0.50928700  | 0.89402500  | -0.11935000 | C                                    | -2.72313800 | 0.55571900  | -0.12050900 |
| C                                       | 1.79111200  | 1.34874400  | 0.14776900  | C                                    | -2.51639500 | -0.84375100 | 0.17713300  |
| C                                       | 2.92269500  | 0.50915600  | 0.05836400  | C                                    | -1.22427900 | -1.32351500 | 0.41125200  |
| C                                       | 2.72904000  | -0.85297800 | -0.33409800 | C                                    | 0.82058900  | 1.81746400  | -0.05534700 |
| C                                       | 1.41654300  | -1.31137300 | -0.62100200 | O                                    | 2.02274600  | 1.44874400  | -0.10153200 |
| C                                       | -0.62844800 | 1.82666900  | 0.02987300  | O                                    | 1.02330000  | -0.88680700 | -1.16018200 |
| O                                       | -1.80730800 | 1.50335600  | 0.19492000  | C                                    | 0.78619700  | -0.61999800 | 2.55674100  |
| O                                       | -0.94980900 | -0.88247200 | -0.81717900 | H                                    | -1.74086700 | 2.45478200  | -0.33782200 |
| C                                       | -1.12617200 | -2.10480000 | -1.56797500 | H                                    | -0.97430000 | -1.16904400 | 2.88994400  |
| H                                       | 1.92630000  | 2.38375600  | 0.44178700  | H                                    | 0.64064000  | 0.45136300  | 2.72948900  |
| H                                       | -2.17839700 | -2.10597900 | -1.85360800 | Mg                                   | 2.50446200  | -0.48963100 | -0.11748100 |
| H                                       | -0.89539400 | -2.97231400 | -0.94264700 | C                                    | 0.88353500  | -1.21696100 | -1.54907600 |
| H                                       | -0.48655700 | -2.08516700 | -2.45477800 | H                                    | 1.76057000  | -0.81637500 | -2.11639500 |
| Mg                                      | -2.73566200 | -0.33108800 | 0.43165900  | C                                    | -0.06997200 | -0.51682400 | 0.24785100  |
| C                                       | -2.44976600 | -1.18237000 | 2.35948700  | O                                    | 0.53013900  | 3.11824100  | -0.14344500 |
| C                                       | 0.32701500  | -0.47549400 | -0.51666600 | H                                    | 1.63495100  | 4.02445200  | -0.32216400 |
| O                                       | -0.27180600 | 3.10900300  | -0.00897000 | C                                    | 1.18367700  | 5.01556800  | -0.36246800 |
| C                                       | -1.32692000 | 4.07735700  | 0.18720900  | H                                    | 2.33050000  | 3.95113900  | 0.51699300  |
| H                                       | -0.83592300 | 5.04690900  | 0.11411700  | H                                    | 2.16494300  | 3.80470300  | -1.25199500 |
| H                                       | -2.08784300 | 3.96509100  | -0.58756600 | H                                    | -1.08264800 | -2.36367900 | 0.68962000  |
| H                                       | -1.78335900 | 3.94426200  | 1.17050100  | C                                    | -3.67388100 | -1.68298300 | 0.25464300  |
| H                                       | 1.28759200  | -2.34470900 | -0.91962100 | H                                    | -3.53793300 | -2.73717000 | 0.48329200  |
| C                                       | 3.86178700  | -1.70370200 | -0.42360200 | C                                    | -4.92896700 | -1.17575400 | 0.03529200  |
| H                                       | 3.72088800  | -2.74012700 | -0.71884800 | H                                    | -5.79199900 | -1.83450600 | 0.09218400  |
| C                                       | 5.12104800  | -1.22401100 | -0.13823100 | C                                    | -5.12631200 | 0.20244500  | -0.27211200 |
| H                                       | 5.97956100  | -1.88603700 | -0.20913000 | H                                    | -6.13066200 | 0.57774700  | -0.44426400 |
| C                                       | 5.31283300  | 0.12603300  | 0.24864100  | C                                    | -4.04484400 | 1.04219900  | -0.34453800 |
| H                                       | 6.31364800  | 0.48520400  | 0.46919100  | H                                    | -4.17686900 | 2.09783900  | -0.57198500 |
| C                                       | 4.23468200  | 0.97465800  | 0.34539900  | H                                    | 0.03008000  | -0.81071700 | -2.09232900 |
| H                                       | 4.36965200  | 2.01151100  | 0.64272900  | C                                    | 0.91222900  | -2.74200200 | -1.59704000 |
| H                                       | -3.42326300 | -1.25787500 | 2.86975700  | H                                    | 0.06535000  | -3.16365600 | -1.04250000 |
| H                                       | -1.85846600 | -0.50263100 | 2.99690000  | H                                    | 0.83924800  | -3.12588400 | -2.62445400 |
| C                                       | -1.78191400 | -2.57367800 | 2.38392200  | H                                    | 1.83178200  | -3.15929400 | -1.16623900 |
| H                                       | -2.36741800 | -3.31671200 | 1.82353800  |                                      |             |             |             |
| H                                       | -0.77883900 | -2.55664400 | 1.93061400  | Structure 9-TSCO-I [B3LYP/6-31G(d)]  |             |             |             |
| H                                       | -1.65203800 | -2.98528500 | 3.39904900  | Cl                                   | -4.47170800 | -1.60146400 | -0.05516200 |
| Structure 9-TSOMe-I [B3LYP/6-31G(d)]    |             |             |             | C                                    | 0.33163100  | 0.52433100  | -0.29431900 |
| Cl                                      | -4.65153400 | -1.40738300 | 0.02332000  | C                                    | 1.55618700  | 1.15753100  | -0.24220900 |
| C                                       | 0.24217800  | 0.79172600  | -0.18394600 | C                                    | 2.77843600  | 0.44605700  | -0.13290800 |
| C                                       | 1.53144300  | 1.32678100  | -0.10030900 | C                                    | 2.73735700  | -0.98016500 | -0.07253700 |
| C                                       | 2.67582600  | 0.52303500  | -0.06272300 | C                                    | -0.92908200 | 1.31932300  | -0.49240500 |
| C                                       | 2.50089100  | -0.91066100 | -0.12688400 | O                                    | -1.81103800 | 0.93264000  | -1.35358900 |
| C                                       | 1.21619200  | -1.45233300 | -0.23270500 | O                                    | -0.93844300 | -1.51732500 | -0.21553200 |
| C                                       | -0.90799100 | 1.66638300  | -0.12056700 | C                                    | -1.01740100 | -2.95658800 | -0.20731100 |
| O                                       | -2.09526400 | 1.27202100  | 0.00372000  | H                                    | 1.58119400  | 2.23966000  | -0.30168300 |
| O                                       | -1.03725600 | -1.16214600 | -1.05642000 | H                                    | -2.08171500 | -3.18936300 | -0.24334100 |
| C                                       | -0.79490200 | -1.06776700 | -2.47448100 | H                                    | -0.57436200 | -3.35385300 | 0.71063500  |
| H                                       | 1.64042300  | 2.40592000  | -0.05510000 | H                                    | -0.50648600 | -3.36079500 | -1.08563900 |
| H                                       | -1.67195800 | -1.50058700 | -2.95869200 | Mg                                   | -2.64071100 | -0.30040800 | -0.09729000 |
| H                                       | 0.10125000  | -1.63733400 | -2.73165200 | C                                    | -1.90278400 | 1.02132400  | -1.57004000 |
| H                                       | -0.66887400 | -0.02403000 | -2.78041700 | O                                    | 0.31209300  | -0.90705900 | -0.21508800 |
| Mg                                      | -2.54446400 | -0.66555500 | 0.15532600  | C                                    | -0.70481100 | 2.64478000  | -0.33036700 |
| C                                       | -0.92353400 | -1.27439000 | 1.64845700  | C                                    | -1.71820500 | 3.52433000  | -0.83352600 |
| H                                       | -0.57678500 | -2.30687100 | 1.54659100  | H                                    | -1.35145700 | 4.53087300  | -0.62834800 |
| H                                       | -1.96350400 | -1.36827500 | 2.05845600  | H                                    | -1.86299500 | 3.37598400  | -1.90566400 |
| C                                       | 0.04318200  | -0.65955900 | -0.19334800 | H                                    | -2.66744600 | 3.35935500  | -0.31476700 |
| O                                       | -0.65427600 | 2.97605800  | -0.17766700 | C                                    | 1.47411300  | -1.63188300 | -0.10889300 |
| C                                       | -1.78168700 | 3.86579900  | -0.06783800 | C                                    | 1.45439400  | -2.71326900 | -0.04674900 |
| H                                       | -1.36032500 | 4.86726600  | -0.15160300 | C                                    | 3.95602100  | -1.69940300 | 0.02881800  |
| H                                       | -2.49685400 | 3.67905500  | -0.87216800 | H                                    | 3.92542900  | -2.78534100 | 0.07523600  |
| H                                       | -2.27897200 | 3.73660600  | 0.89632700  | C                                    | 5.16157700  | -1.03283500 | 0.06801200  |
| C                                       | -0.11740800 | -0.49311700 | 2.67494300  | H                                    | 6.08864800  | -1.59414500 | 0.14561200  |
| H                                       | -0.19649100 | -0.92161300 | 3.68344900  | C                                    | 5.20352800  | 0.38095800  | 0.00746800  |
| H                                       | 0.94514600  | -0.48357600 | 2.40878700  | H                                    | 6.16134700  | 0.89240500  | 0.03905000  |
| H                                       | -0.45021700 | 0.55126300  | 2.74342000  | C                                    | 4.03559400  | 1.10421600  | -0.09116900 |
| H                                       | 1.09529800  | -2.52871600 | -0.32420600 | H                                    | 4.05973200  | 2.19009400  | -0.13865000 |
| C                                       | 3.67873800  | -1.72504800 | -0.11326600 | H                                    | -2.58161300 | 0.25657500  | 2.01721200  |
| H                                       | 3.56547100  | -2.80511800 | -0.16470400 | C                                    | -0.73484600 | 1.19905900  | 2.53307000  |
| C                                       | 4.92522000  | -1.15977900 | -0.03088400 | H                                    | -1.06305600 | 1.47455400  | 3.54589900  |
| H                                       | 5.80500000  | -1.79832900 | -0.01754200 | H                                    | -0.14053200 | 0.28148000  | 2.62631300  |
| C                                       | 5.09233100  | 0.25452700  | 0.04264600  | H                                    | -0.06077600 | 1.99076100  | 2.18708500  |
| H                                       | 6.09089700  | 0.67587900  | 0.11023800  | H                                    | -2.50372800 | 1.93889100  | 1.51667900  |
| C                                       | 3.99037800  | 1.06978500  | 0.02629700  | Structure 9-TSCO-II [B3LYP/6-31G(d)] |             |             |             |
| H                                       | 4.09936300  | 2.15088200  | 0.07905700  | Cl                                   | -4.28849800 | -1.79968400 | -0.05223700 |
| Structure 9-TSOMe-II [B3LYP/6-31G(d)]   |             |             |             | C                                    | 0.42732000  | 0.50674300  | -0.26149200 |
| Cl                                      | 4.61471100  | -1.22297700 | -0.02694200 | C                                    | 1.61827600  | 1.19349600  | -0.15231000 |
|                                         |             |             |             | C                                    | 2.86612100  | 0.53530400  | -0.00273100 |

|    |             |             |             |    |             |             |             |
|----|-------------|-------------|-------------|----|-------------|-------------|-------------|
| C  | 2.88719800  | -0.89232600 | 0.03555900  | O  | 1.49472800  | 0.21921500  | -0.58052600 |
| C  | -0.86550100 | 1.24740200  | -0.48373800 | O  | 3.94072200  | 1.28207500  | 0.85931000  |
| O  | -1.71023700 | 0.82666400  | -1.36702100 | C  | 5.02546100  | 1.73487700  | 1.60954700  |
| O  | -0.75225300 | -1.59052500 | -0.26965300 | H  | -1.82379900 | 2.18525600  | -0.40248000 |
| C  | -0.76855200 | -3.03064300 | -0.28215200 | H  | 4.72923400  | 1.96832600  | 2.64711800  |
| H  | 1.59559500  | 2.27666500  | -0.19191700 | H  | 5.45347500  | 2.66068900  | 1.18567500  |
| H  | -1.81970700 | -3.30889300 | -0.35957300 | H  | 5.85039100  | 1.00379600  | 1.67022500  |
| H  | -0.34297800 | -3.42276900 | 0.64643300  | Mg | 3.40581400  | -0.16159700 | -0.13605300 |
| H  | -0.20889700 | -3.40061500 | -1.14583500 | C  | 0.04893900  | -2.16281000 | 0.07597700  |
| Mg | -2.50567900 | -0.43719300 | -0.11636800 | C  | -1.07263100 | -1.14583600 | -0.01898300 |
| C  | -1.73956400 | 0.81263900  | 1.58212700  | O  | 0.44631500  | 2.19796900  | -0.48315300 |
| C  | 0.46876700  | -0.92591400 | -0.20501500 | C  | 1.70006500  | 2.88576700  | -0.73647500 |
| O  | -0.70913800 | 2.58453100  | -0.31880000 | H  | 1.45785000  | 3.94210300  | -0.62417100 |
| C  | -1.64418600 | 3.42481100  | -1.01209500 | H  | 2.46948100  | 2.56698400  | -0.02372300 |
| H  | -1.55911500 | 3.28572700  | -2.09262400 | H  | 2.02028300  | 2.68169300  | -1.76269200 |
| H  | -2.67108400 | 3.21608800  | -0.70447600 | H  | -2.53451400 | -2.66056900 | 0.28708000  |
| H  | -1.36834200 | 4.44317200  | -0.73447400 | C  | -4.82818500 | -1.23155500 | 0.27026800  |
| C  | 1.65745800  | -1.59942500 | -0.06366200 | H  | -4.98437100 | -2.29703900 | 0.41843300  |
| H  | 1.68450300  | -2.68163800 | -0.02013000 | C  | -5.89840000 | -0.36547800 | 0.23767000  |
| C  | 4.13202400  | -1.55787400 | 0.17784200  | H  | -6.90811100 | -0.74745100 | 0.36079300  |
| H  | 4.14864700  | -2.64472400 | 0.20771000  | C  | -5.69879400 | 1.02531100  | 0.04340000  |
| C  | 5.30365300  | -0.83908500 | 0.27720100  | H  | -6.55581200 | 1.69217000  | 0.02008000  |
| H  | 6.25111500  | -1.35969400 | 0.38606500  | C  | -4.42756300 | 1.52564900  | -0.11485800 |
| C  | 5.28403400  | 0.57593100  | 0.23833100  | H  | -4.26477400 | 2.59007500  | -0.26467000 |
| H  | 6.21558200  | 1.12911300  | 0.31742900  | H  | 0.78149600  | -2.01637100 | -0.71985900 |
| C  | 4.08960200  | 1.24782800  | 0.10087000  | C  | 0.76322700  | -2.15767000 | 1.44129200  |
| H  | 4.06658200  | 2.33434900  | 0.06979500  | H  | 0.07281900  | -2.42972300 | 2.24744200  |
| C  | -0.81058000 | 1.22728500  | 1.97293500  | H  | 1.59018600  | -2.87539300 | 1.43759800  |
| H  | -2.92736700 | 1.71313800  | 1.94376200  | H  | 1.17037100  | -1.16936800 | 1.68555400  |
| H  | -2.78567300 | 2.72353400  | 1.54480800  | H  | -0.38726800 | -3.15598300 | -0.08027300 |
| H  | -3.88896200 | 1.34154700  | 1.55824800  |    |             |             |             |
| H  | -3.05700700 | 1.81675700  | 3.03164800  |    |             |             |             |
| H  | -1.83972600 | -0.17248000 | 2.08720100  |    |             |             |             |

Structure 9-intOMe-I [B3LYP/6-31G(d)]

|    |             |             |             |
|----|-------------|-------------|-------------|
| Cl | -4.87525100 | 1.33507200  | 0.73809400  |
| C  | 0.80986900  | 0.50116000  | 0.07726700  |
| C  | 1.93572100  | 1.27491200  | -0.18027700 |
| C  | 3.23619300  | 0.73012200  | -0.17604900 |
| C  | 3.37996800  | -0.66206600 | 0.11117700  |
| C  | 2.21723400  | -1.42984300 | 0.38267400  |
| C  | -0.50144000 | 1.17638000  | -0.00059700 |
| O  | -1.59184600 | 0.59279200  | -0.04492600 |
| O  | -3.29619200 | -1.77213300 | -0.96750100 |
| C  | -3.98712200 | -2.86400600 | -1.47713400 |
| H  | 1.81403700  | 2.32952400  | -0.40017100 |
| H  | -3.75082300 | -3.79045600 | -0.92303000 |
| H  | -3.72374600 | -3.05352600 | -2.53310200 |
| H  | -5.08508600 | -2.74557200 | -1.44077200 |
| Mg | -3.43844000 | -0.14993200 | -0.16415000 |
| C  | -0.25525500 | -1.78959800 | 0.70398600  |
| H  | -0.94285700 | -1.82593500 | -0.14969400 |
| H  | -0.82778000 | -1.30727800 | 1.50840200  |
| C  | 0.93930600  | -0.90811200 | 0.37576300  |
| O  | -0.43431600 | 2.50338100  | -0.03785000 |
| C  | -1.67304400 | 3.23772100  | -0.18401900 |
| H  | -1.39120600 | 4.28402800  | -0.07367800 |
| H  | -2.09470800 | 3.05963300  | -1.17680700 |
| H  | -2.39571600 | 2.94011500  | 0.57725600  |
| C  | 0.06341000  | -3.22558900 | 1.13127100  |
| H  | -0.87180400 | -3.74616900 | 1.35968900  |
| H  | 0.56213100  | -3.78891900 | 0.33446500  |
| H  | 0.69627800  | -3.26492500 | 2.02561100  |
| H  | 2.35938300  | -2.48069000 | 0.60967700  |
| C  | 4.68318400  | -1.22506000 | 0.12029400  |
| H  | 4.79779200  | -2.28374000 | 0.33874000  |
| C  | 5.78566500  | -0.44249600 | -0.14327600 |
| H  | 6.77821500  | -0.88449200 | -0.13356300 |
| C  | 5.64142900  | 0.93904300  | -0.42887900 |
| H  | 6.52270000  | 1.53980800  | -0.63427400 |
| C  | 4.39189300  | 1.51365100  | -0.44569400 |
| H  | 4.27049900  | 2.57191900  | -0.66337400 |

Structure 9-intOMe-II [B3LYP/6-31G(d)]

|    |             |             |             |
|----|-------------|-------------|-------------|
| Cl | 4.10654600  | -2.10282500 | -1.01448400 |
| C  | -0.88374900 | 0.27124900  | -0.21952300 |
| C  | -1.98236100 | 1.12440800  | -0.24592100 |
| C  | -3.30248900 | 0.65576100  | -0.08438800 |
| C  | -3.50351700 | -0.74623600 | 0.11094200  |
| C  | -2.36903000 | -1.59617800 | 0.13605400  |
| C  | 0.45034400  | 0.87506600  | -0.43305300 |

Structure 9-intOMe-III [B3LYP/6-31G(d)]

|    |             |             |             |
|----|-------------|-------------|-------------|
| Cl | 4.60731500  | 1.19564700  | -1.36292500 |
| C  | -0.88379500 | 0.38127400  | -0.14850900 |
| C  | -1.96359000 | 1.10731900  | 0.34311600  |
| C  | -3.28447000 | 0.61773100  | 0.28275100  |
| C  | -3.50608800 | -0.65877100 | -0.32319000 |
| C  | -2.39152100 | -1.36809500 | -0.83658200 |
| C  | 0.45994500  | 0.97402900  | 0.01201400  |
| O  | 1.51757500  | 0.33874800  | -0.07934900 |
| O  | 3.60725300  | -1.36610900 | 1.36768900  |
| C  | 4.41813600  | -2.21447400 | 2.10776500  |
| H  | -1.78814000 | 2.07576300  | 0.79786700  |
| H  | 4.21349800  | -3.27649400 | 1.88140500  |
| H  | 4.25337200  | -2.08743600 | 3.19267600  |
| H  | 5.49704700  | -2.05434300 | 1.93034200  |
| Mg | 3.46079000  | -0.12414300 | 0.06131700  |
| C  | 0.00207600  | -1.77443700 | -1.35665600 |
| H  | 0.79384100  | -1.15948600 | -1.79185800 |
| C  | -1.09246300 | -0.90367000 | -0.76580600 |
| O  | 0.45005200  | 2.27454700  | 0.28681600  |
| C  | 1.71735100  | 2.92853300  | 0.52394500  |
| H  | 1.47045900  | 3.98262100  | 0.64385100  |
| H  | 2.16882700  | 2.54257400  | 1.44310300  |
| H  | 2.39473900  | 2.78037200  | -0.31995200 |
| H  | -2.57471700 | -2.32813600 | -1.31462900 |
| C  | -4.83250100 | -1.16104800 | -0.39393200 |
| H  | -5.00420600 | -2.13061900 | -0.85439800 |
| C  | -5.88401900 | -0.43191700 | 0.11455700  |
| H  | -6.89477300 | -0.82631500 | 0.05663300  |
| C  | -5.66370600 | 0.83385900  | 0.71591800  |
| H  | -6.50637000 | 1.39415500  | 1.11049300  |
| C  | -4.39102300 | 1.34803700  | 0.79823700  |
| H  | -4.21310200 | 2.31751000  | 1.25690500  |
| H  | -0.44239400 | -2.33790800 | -2.18575200 |
| C  | 0.60969400  | -2.77610100 | -0.35466800 |
| H  | -0.17279900 | -3.40401800 | -0.86653100 |
| H  | 1.31683500  | -3.43586900 | -0.87046000 |
| H  | 1.15084800  | -2.27975200 | 0.45615100  |

Structure 9-intCO-I [B3LYP/6-31G(d)]

|    |             |             |             |
|----|-------------|-------------|-------------|
| Cl | -4.32537900 | -2.17820100 | -0.72794500 |
| C  | 0.28145600  | 0.57341200  | -0.02682000 |
| C  | 1.54707600  | 1.03324900  | -0.32843600 |
| C  | 2.69987500  | 0.20564100  | -0.31447200 |
| C  | 2.55397300  | -1.17194500 | 0.02924300  |
| C  | -0.93672300 | 1.53163800  | -0.03875900 |
| O  | -1.98421800 | 1.01326500  | -0.76633400 |
| O  | -1.12424700 | -1.32411900 | 0.58693100  |
| C  | -1.22591100 | -2.53913900 | 1.36122500  |
| H  | 1.65379100  | 2.07963400  | -0.58758600 |

|    |             |             |             |
|----|-------------|-------------|-------------|
| H  | -2.28296000 | -2.65405300 | 1.60208800  |
| H  | -0.62685900 | -2.44005400 | 2.26986200  |
| H  | -0.89697500 | -3.40213000 | 0.77656400  |
| Mg | -2.70663800 | -0.66042000 | -0.55619800 |
| C  | -1.39294400 | 1.85129600  | 1.41666200  |
| C  | 0.16834000  | -0.81445300 | 0.30424700  |
| O  | -0.44404600 | 2.73046300  | -0.65312600 |
| C  | -1.42876000 | 3.68625000  | -1.00966500 |
| H  | -0.90947400 | 4.44959700  | -1.59574900 |
| H  | -2.22145600 | 3.23454800  | -1.61308100 |
| H  | -1.87931300 | 4.16950000  | -0.12984100 |
| C  | 1.25477100  | -1.65676500 | 0.33171600  |
| H  | 1.14377600  | -2.70788800 | 0.57229500  |
| C  | 3.70189800  | -2.00712900 | 0.04797600  |
| H  | 3.58755900  | -3.05687900 | 0.30837600  |
| C  | 4.94276200  | -1.49551200 | -0.26097600 |
| H  | 5.81595300  | -2.14201800 | -0.24464300 |
| C  | 5.09070600  | -0.12834000 | -0.60101000 |
| H  | 6.07577900  | 0.26123900  | -0.84233000 |
| C  | 3.99306200  | 0.70281700  | -0.62712000 |
| H  | 4.09964700  | 1.75262200  | -0.88866000 |
| H  | -1.65804900 | 0.90422400  | 1.90617700  |
| C  | -0.38017500 | 2.61240500  | 2.27534300  |
| H  | -0.78589000 | 2.80429700  | 3.27530200  |
| H  | 0.55086300  | 2.04710000  | 2.39399000  |
| H  | -0.12632300 | 3.57418700  | 1.81956400  |
| H  | -2.32532500 | 2.42309900  | 1.33242600  |

Structure 9-intCO-II [B3LYP/6-31G(d)]

|    |             |             |             |
|----|-------------|-------------|-------------|
| Cl | -4.25891000 | -2.16149300 | -0.83076600 |
| C  | 0.32476200  | 0.58476400  | 0.10004500  |
| C  | 1.59045700  | 1.10789400  | -0.07046600 |
| C  | 2.76925700  | 0.31901000  | -0.09361700 |
| C  | 2.65073200  | -1.09297900 | 0.07781700  |
| C  | -0.90460700 | 1.54902300  | 0.15127000  |
| O  | -1.97744200 | 1.05418100  | -0.54673300 |
| O  | -1.03664600 | -1.40609200 | 0.48843200  |
| C  | -1.11078400 | -2.70436000 | 1.11847000  |
| H  | 1.67452500  | 2.18381500  | -0.18190200 |
| H  | -2.16629500 | -2.87503500 | 1.33194000  |
| H  | -0.52330600 | -2.69422700 | 2.03989900  |
| H  | -0.75221300 | -3.48514000 | 0.44275400  |
| Mg | -2.66542500 | -0.64359800 | -0.50232600 |
| C  | -1.24516000 | 1.84264500  | 1.63569000  |
| C  | 0.24382300  | -0.83238900 | 0.28387900  |
| O  | -0.50393700 | 2.82260900  | -0.37220600 |
| C  | -0.54706300 | 2.94614100  | -1.78665400 |
| H  | 0.11469200  | 2.22315600  | -2.28613000 |
| H  | -1.56318200 | 2.81582300  | -2.16951400 |
| H  | -0.19646100 | 3.95816400  | -2.00842400 |
| C  | 1.35581100  | -1.64208000 | 0.26753300  |
| H  | 1.27070100  | -2.71502100 | 0.39579500  |
| C  | 3.82214700  | -1.89481600 | 0.05383500  |
| H  | 3.72898700  | -2.97076500 | 0.18214300  |
| C  | 5.05929400  | -1.31814900 | -0.12999700 |
| H  | 5.95065800  | -1.93927400 | -0.14736700 |
| C  | 5.17994400  | 0.08351800  | -0.29640800 |
| H  | 6.16256600  | 0.52447300  | -0.43915500 |
| C  | 4.05933200  | 0.88359300  | -0.27833100 |
| H  | 4.14574100  | 1.95978600  | -0.40618600 |
| H  | -0.36124900 | 2.28808600  | 2.10760700  |
| C  | -2.45603700 | 2.76155200  | 1.80768500  |
| H  | -2.26812700 | 3.73136600  | 1.33909800  |
| H  | -3.34705100 | 2.33088700  | 1.33985700  |
| H  | -2.67034900 | 2.92507900  | 2.87005900  |
| H  | -1.42031400 | 0.88158200  | 2.14001500  |

Structure 9-intCO-III [B3LYP/6-31G(d)]

|    |             |             |             |
|----|-------------|-------------|-------------|
| Cl | -4.37673300 | -1.96105400 | -0.86529800 |
| C  | 0.33917300  | 0.62292400  | 0.02230400  |
| C  | 1.61842000  | 1.12258300  | -0.13826500 |
| C  | 2.78073300  | 0.31319000  | -0.18024500 |
| C  | 2.63600500  | -1.09993700 | -0.05001500 |
| C  | -0.85060500 | 1.62895500  | 0.08909500  |
| O  | -2.00685100 | 1.15940000  | -0.46676400 |
| O  | -1.05506300 | -1.37474800 | 0.31244100  |
| C  | -1.14670900 | -2.69590800 | 0.88964600  |
| H  | 1.72740400  | 2.19511300  | -0.24615000 |
| H  | -2.20600700 | -2.86594400 | 1.08499800  |
| H  | -0.57000100 | -2.72807400 | 1.81729600  |
| H  | -0.78728000 | -3.45248700 | 0.18745200  |

|    |             |             |             |
|----|-------------|-------------|-------------|
| Mg | -2.71013400 | -0.52418600 | -0.53093400 |
| C  | -1.07233900 | 2.09974300  | 1.55671100  |
| C  | 0.23033500  | -0.79891300 | 0.15190700  |
| O  | -0.36114600 | 2.76573600  | -0.65637500 |
| C  | -1.32818600 | 3.73092000  | -1.03125600 |
| H  | -2.16119100 | 3.27589500  | -1.57538700 |
| H  | -1.72834200 | 4.28629800  | -0.17005500 |
| H  | -0.80674800 | 4.43685000  | -1.68413200 |
| C  | 1.33022800  | -1.62678100 | 0.11145200  |
| H  | 1.22220600  | -2.70185200 | 0.19338400  |
| C  | 3.79275700  | -1.92284700 | -0.09273400 |
| H  | 3.67929300  | -3.00016100 | 0.00415400  |
| C  | 5.04033100  | -1.36373400 | -0.25637700 |
| H  | 5.92049000  | -2.00013600 | -0.28845300 |
| C  | 5.18717600  | 0.04010900  | -0.38431100 |
| H  | 6.17821100  | 0.46631600  | -0.51306600 |
| C  | 4.08168600  | 0.85955800  | -0.34724500 |
| H  | 4.18730500  | 1.93699100  | -0.44678300 |
| H  | -0.13881200 | 2.55265200  | 1.91055000  |
| C  | -1.53712600 | 1.03100900  | 2.54781500  |
| H  | -1.69729400 | 1.47099200  | 3.53851500  |
| H  | -2.49174900 | 0.58641700  | 2.23863800  |
| H  | -0.80232200 | 0.22576100  | 2.66358100  |
| H  | -1.82587500 | 2.89517900  | 1.52140700  |

Structure 9-iPrMgCl\_I [B3LYP/6-31G(d)]

|    |             |             |             |
|----|-------------|-------------|-------------|
| Cl | -3.97576900 | -0.84787000 | -1.78206900 |
| C  | 0.68528500  | 0.79767400  | -0.33068800 |
| C  | 1.93533500  | 1.31568800  | -0.02890700 |
| C  | 3.08680400  | 0.50428200  | 0.06339600  |
| C  | 2.94955400  | -0.89939700 | -0.17554900 |
| C  | 1.67068000  | -1.42467400 | -0.49720000 |
| C  | -0.47597100 | 1.71133900  | -0.37682800 |
| O  | -1.66029000 | 1.37548400  | -0.29464400 |
| O  | -0.68251200 | -1.09631700 | -0.90941000 |
| C  | -0.76727000 | -2.39892100 | -1.53082300 |
| H  | 2.02820900  | 2.38142000  | 0.14807800  |
| H  | -1.79274200 | -2.46977900 | -1.89416600 |
| H  | -0.56040900 | -3.18549200 | -0.79863500 |
| H  | -0.06181400 | -2.45323700 | -2.36452500 |
| Mg | -2.61734500 | -0.42472600 | 0.02255100  |
| C  | -2.68203000 | -0.98170700 | 2.08887900  |
| O  | 0.55988200  | -0.61416400 | -0.57222800 |
| C  | -0.13885400 | 2.99312000  | -0.50284600 |
| C  | -1.22309000 | 3.94911200  | -0.50156900 |
| H  | -0.74298200 | 4.91856100  | -0.62847000 |
| H  | -1.90791900 | 3.74092700  | -1.32583400 |
| H  | -1.76492200 | 3.90363700  | 0.44571400  |
| H  | 1.58536100  | -2.48929500 | -0.67790700 |
| C  | 4.10189800  | -1.72268500 | -0.08197700 |
| H  | 4.00347600  | -2.79028800 | -0.26028700 |
| C  | 5.32714200  | -1.17725400 | 0.23219600  |
| H  | 6.20138400  | -1.81846700 | 0.30206500  |
| C  | 5.46335500  | 0.21390500  | 0.46705700  |
| H  | 6.43799700  | 0.62463400  | 0.71326000  |
| C  | 4.36467000  | 1.03738900  | 0.38472900  |
| H  | 4.45707400  | 2.10542400  | 0.56468000  |
| C  | -3.79696200 | -0.24966500 | 2.86001400  |
| H  | -3.63489400 | 0.83934200  | 2.88210700  |
| H  | -4.78692300 | -0.41482900 | 2.41377800  |
| H  | -3.86407700 | -0.56951400 | 3.91683600  |
| H  | -2.93716200 | -2.05619600 | 2.11557400  |
| C  | -1.34396700 | -0.82670600 | 2.83403900  |
| H  | -0.53964400 | -1.42596800 | 2.38286400  |
| H  | -0.99418300 | 0.21782400  | 2.84193300  |
| H  | -1.40825200 | -1.13180000 | 3.89542200  |

Structure 9-iPrMgCl\_II [B3LYP/6-31G(d)]

|    |             |             |             |
|----|-------------|-------------|-------------|
| Cl | -4.17045700 | -0.47807800 | -1.60595800 |
| C  | 0.63024500  | 0.88926400  | -0.24472300 |
| C  | 1.90729200  | 1.32508200  | 0.07373200  |
| C  | 3.03015800  | 0.47086700  | 0.02652400  |
| C  | 2.83378500  | -0.88792900 | -0.37548100 |
| C  | 1.52696100  | -1.32826500 | -0.71181500 |
| C  | -0.49718700 | 1.84054900  | -0.14546200 |
| O  | -1.69073600 | 1.53756800  | -0.06915400 |
| O  | -0.82436500 | -0.87381100 | -0.99576800 |
| C  | -0.98091800 | -2.09062700 | -1.76123600 |
| H  | 2.04497400  | 2.35765900  | 0.37456500  |
| H  | -2.01928700 | -2.07925300 | -2.09343800 |
| H  | -0.78676800 | -2.96442500 | -1.13204400 |

|    |             |             |             |
|----|-------------|-------------|-------------|
| H  | -0.30267100 | -2.07274600 | -2.61873900 |
| Mg | -2.67460600 | -0.26681300 | 0.12397500  |
| C  | -2.57416700 | -1.04266500 | 2.11758200  |
| C  | 0.44529900  | -0.47823700 | -0.64908100 |
| O  | -0.11597500 | 3.11613400  | -0.12851100 |
| C  | -1.16341400 | 4.10047800  | 0.02331200  |
| H  | -0.65081100 | 5.06139400  | 0.00553400  |
| H  | -1.87496600 | 4.02181700  | -0.80094800 |
| H  | -1.68399800 | 3.95376000  | 0.97214300  |
| H  | 1.39595600  | -2.36005500 | -1.01473400 |
| C  | 3.95761600  | -1.75352100 | -0.42382500 |
| H  | 3.81440800  | -2.78753100 | -0.72634700 |
| C  | 5.21138500  | -1.29073800 | -0.09028300 |
| H  | 6.06329100  | -1.96378700 | -0.13027800 |
| C  | 5.40606400  | 0.05607900  | 0.30629700  |
| H  | 6.40249200  | 0.40167400  | 0.56502700  |
| C  | 4.33629300  | 0.91873700  | 0.36401800  |
| H  | 4.47341900  | 1.95325300  | 0.66831100  |
| C  | -1.62973600 | -0.26400700 | 3.05104600  |
| H  | -1.91452800 | 0.79400100  | 3.14289700  |
| H  | -1.60695500 | -0.67650400 | 4.07721600  |
| H  | -0.58711200 | -0.28360100 | 2.69564800  |
| H  | -3.58971900 | -0.94343900 | 2.53826100  |
| C  | -2.22996700 | -2.54362900 | 2.15919600  |
| H  | -2.22190500 | -2.95159300 | 3.18736100  |
| H  | -2.94403100 | -3.14946400 | 1.58413500  |
| H  | -1.22837500 | -2.74984400 | 1.74765800  |

Structure 9-iPrMgCl\_III [B3LYP/6-31G(d)]

|    |             |             |             |
|----|-------------|-------------|-------------|
| Cl | -4.04963500 | -0.27639200 | -1.71797400 |
| C  | 0.74454200  | 0.92892500  | -0.16515800 |
| C  | 2.01141100  | 1.30711100  | 0.25140600  |
| C  | 3.11620400  | 0.42979600  | 0.19658900  |
| C  | 2.91268700  | -0.88865100 | -0.32034600 |
| C  | 1.61674900  | -1.26837400 | -0.75783800 |
| C  | -0.36807800 | 1.89593500  | -0.04873200 |
| O  | -1.56879900 | 1.61252100  | -0.02885600 |
| O  | -0.70640200 | -0.72978500 | -1.12418300 |
| C  | -0.85307500 | -1.87412900 | -1.99550800 |
| H  | 2.15506500  | 2.31016400  | 0.63757200  |
| H  | -1.87627200 | -1.81149200 | -2.36655500 |
| H  | -0.70406900 | -2.80189400 | -1.43504900 |
| H  | -0.13738600 | -1.79999600 | -2.81888100 |
| Mg | -2.55929000 | -0.20514500 | 0.02769300  |
| C  | -2.40543000 | -1.12924600 | 1.95346500  |
| C  | 0.55230700  | -0.39805700 | -0.68357700 |
| O  | 0.03659800  | 3.16009200  | 0.05655200  |
| C  | -0.99675800 | 4.15547200  | 0.23228000  |
| H  | -0.46601500 | 5.10507900  | 0.28700600  |
| H  | -1.68201400 | 4.13888700  | -0.61739400 |
| H  | -1.55128400 | 3.96497400  | 1.15378000  |
| H  | 1.47911400  | -2.26980900 | -1.14749000 |
| C  | 4.01848300  | -1.77668800 | -0.37717900 |
| H  | 3.86930200  | -2.78046200 | -0.76628300 |
| C  | 5.26201100  | -1.37353000 | 0.05691100  |
| H  | 6.09998600  | -2.06336200 | 0.00937300  |
| C  | 5.46386800  | -0.06673200 | 0.56736500  |
| H  | 6.45203100  | 0.23205200  | 0.90428400  |
| C  | 4.41155900  | 0.81636500  | 0.63595100  |
| H  | 4.55454800  | 1.82060700  | 1.02670100  |
| H  | -1.56677300 | -0.63517000 | 2.47924000  |
| C  | -2.05056400 | -2.62638700 | 1.87474300  |
| H  | -2.82428900 | -3.20349700 | 1.34685600  |
| H  | -1.10111300 | -2.80366800 | 1.34653300  |
| H  | -1.94701900 | -3.09372800 | 2.87211000  |
| C  | -3.65410900 | -0.93655400 | 2.83344900  |
| H  | -4.54979100 | -1.37738600 | 2.37292900  |
| H  | -3.55144100 | -1.41010700 | 3.82806800  |
| H  | -3.87933200 | 0.12505200  | 3.00942400  |

Structure 9'-TSOMe-I [B3LYP/6-31G(d)]

|    |             |             |             |
|----|-------------|-------------|-------------|
| Cl | -4.64224700 | -1.12196100 | -0.28924800 |
| C  | 0.30891000  | 0.94752100  | -0.11940100 |
| C  | 1.61059500  | 1.42741300  | 0.04915700  |
| C  | 2.73364300  | 0.59512400  | -0.02163900 |
| C  | 2.52193900  | -0.80577300 | -0.30545200 |
| C  | 1.22267000  | -1.29055000 | -0.49529600 |
| C  | -0.81398000 | 1.84441300  | 0.03652600  |
| O  | -2.01715500 | 1.47893900  | 0.07782800  |
| O  | -1.01409500 | -0.83189900 | -1.26398200 |
| C  | -0.75478000 | -0.54422000 | -2.65316900 |

|    |             |             |             |
|----|-------------|-------------|-------------|
| H  | 1.74934900  | 2.48608500  | 0.24562100  |
| H  | -1.64046000 | -0.87363300 | -3.19930700 |
| H  | 0.12535800  | -1.10020300 | -2.98414700 |
| H  | -0.59143400 | 0.52787700  | -2.80424700 |
| Mg | -2.52645000 | -0.44299600 | -0.03415700 |
| C  | -0.98630800 | -1.28901600 | 1.46731100  |
| H  | -2.00596900 | -1.03540800 | 1.86078100  |
| C  | 0.06834400  | -0.48609800 | -0.32720200 |
| O  | -0.51950800 | 3.14105300  | 0.16168300  |
| C  | -1.62170300 | 4.04639400  | 0.36023200  |
| H  | -1.16727000 | 5.03482600  | 0.42393000  |
| H  | -2.31664900 | 3.99452700  | -0.48103000 |
| H  | -2.15310400 | 3.80686800  | 1.28431800  |
| C  | -0.02594500 | -0.74914900 | 2.51361000  |
| H  | -0.19839900 | -1.20703200 | 3.49894800  |
| H  | 1.01140200  | -0.96685200 | 2.23209900  |
| H  | -0.11747300 | 0.33651700  | 2.63728000  |
| H  | 1.08182200  | -2.32639200 | -0.78945600 |
| C  | 3.67839200  | -1.64129300 | -0.42327400 |
| H  | 3.53803500  | -2.69676300 | -0.64332100 |
| C  | 4.93904200  | -1.12841700 | -0.25337000 |
| H  | 5.80197100  | -1.78389100 | -0.34102200 |
| C  | 5.14195700  | 0.25139600  | 0.04209100  |
| H  | 6.15049100  | 0.63110700  | 0.17591900  |
| C  | 4.06060900  | 1.08738600  | 0.15234200  |
| H  | 4.19690100  | 2.14402100  | 0.37246300  |
| C  | -0.93271500 | -2.80692200 | 1.33161900  |
| H  | 0.04017300  | -3.12640400 | 0.93919400  |
| H  | -1.05788300 | -3.30593800 | 2.30476900  |
| H  | -1.70922700 | -3.20400800 | 0.66503300  |

Structure 9'-TSOMe-II [B3LYP/6-31G(d)]

|    |             |             |             |
|----|-------------|-------------|-------------|
| Cl | 4.52056300  | -1.09226300 | 0.35164800  |
| C  | -0.42336000 | 0.93985600  | 0.13356500  |
| C  | -1.72282400 | 1.38842500  | -0.12699300 |
| C  | -2.82998100 | 0.53439500  | -0.10711400 |
| C  | -2.61258000 | -0.85397900 | 0.24163500  |
| C  | -1.32401700 | -1.30746800 | 0.52270400  |
| C  | 0.69160100  | 1.85026100  | 0.04206300  |
| O  | 1.90068800  | 1.49797800  | 0.05616200  |
| O  | 0.89991900  | -0.82541900 | 1.30517500  |
| C  | 0.63864300  | -0.51168900 | 2.68760400  |
| H  | -1.87032900 | 2.44043700  | -3.25159100 |
| H  | 1.52046400  | -0.83941100 | 0.34073100  |
| H  | -0.24788700 | -1.05391000 | 3.02464300  |
| H  | 0.48492600  | 0.56424800  | 2.81967300  |
| Mg | 2.39797600  | -0.43674500 | 0.04926700  |
| C  | 0.79670600  | -1.27779500 | -1.41634600 |
| C  | -0.17206200 | -0.48967200 | 0.35836700  |
| O  | 0.38709300  | 3.14649400  | -0.07904300 |
| C  | 1.48601200  | 4.06563900  | -0.21930800 |
| H  | 1.02363000  | 5.04965800  | -0.29488300 |
| H  | 2.14310100  | 4.01442900  | 0.65191800  |
| H  | 2.06240900  | 3.84169100  | -1.12023100 |
| H  | -1.17257400 | -2.34159700 | 0.82017600  |
| C  | -3.76237100 | -1.70750600 | 0.31219200  |
| H  | -3.61864700 | -2.75182400 | 0.57852900  |
| C  | -5.01608300 | -1.22581900 | 0.04088700  |
| H  | -5.87172000 | -1.89455800 | 0.09369000  |
| C  | -5.22339000 | 0.14059600  | -0.31549600 |
| H  | -6.22758300 | 0.49521300  | -0.52784400 |
| C  | -4.15269600 | 0.99324200  | -0.38330700 |
| H  | -4.29285500 | 2.03925200  | -0.64761500 |
| H  | -0.21505400 | -1.21517500 | -1.81229300 |
| C  | 1.17974100  | -2.74970300 | -1.24092300 |
| H  | 0.51627500  | -3.24964600 | -0.52637800 |
| H  | 1.10803100  | -3.30102400 | -2.19224200 |
| H  | 2.21187900  | -2.89172600 | -0.88545400 |
| H  | 1.69869600  | -0.54719900 | -2.44303000 |
| C  | 2.78116700  | -0.57722500 | -2.21902300 |
| H  | 1.61341100  | -1.02490300 | -3.43217900 |
| H  | 1.41225000  | 0.50354700  | -2.56620200 |

Structure 9'-TSOMe-III [B3LYP/6-31G(d)]

|    |             |             |             |
|----|-------------|-------------|-------------|
| Cl | -4.54702600 | -1.06886100 | -0.70054200 |
| C  | 0.37317800  | 0.85308100  | -0.18636400 |
| C  | 1.67565600  | 1.35611800  | -0.09014000 |
| C  | 2.80230700  | 0.52840300  | -0.10013200 |
| C  | 2.59635900  | -0.89758300 | -0.23279900 |
| C  | 1.30181300  | -1.40579600 | -0.35430500 |
| C  | -0.75230500 | 1.74654900  | -0.04847800 |

|    |             |             |             |    |             |             |             |
|----|-------------|-------------|-------------|----|-------------|-------------|-------------|
| O  | -1.94717800 | 1.37240300  | 0.08090200  | C  | 2.95316400  | -0.89216300 | -0.06069600 |
| O  | -0.94075700 | -1.02835700 | -1.16131600 | C  | -0.76754300 | 1.30909700  | -0.55844300 |
| C  | -0.69264600 | -0.87037300 | -2.57419100 | O  | -1.61444900 | 0.93020500  | -1.46386300 |
| H  | 1.80806200  | 2.42904000  | 0.00908100  | O  | -0.68454600 | -1.53161100 | -0.48980300 |
| H  | -1.59158700 | -1.23120700 | -3.07644700 | C  | -0.71594300 | -2.97019500 | -0.55065400 |
| H  | 0.17495700  | -1.46885800 | -2.86172600 | H  | 1.69711700  | 2.29824700  | -0.15167100 |
| H  | -0.51437000 | 0.18101000  | -2.82178800 | H  | -1.76819900 | -3.23350600 | -0.65663800 |
| Mg | -2.47525000 | -0.54051700 | -0.00249200 | H  | -0.31111900 | -3.39660100 | 0.37212900  |
| C  | -0.80682200 | -1.30682800 | 1.56755700  | H  | -0.14418900 | -3.31660900 | -1.41604700 |
| C  | 0.14057800  | -0.59324900 | -0.26523200 | Mg | -2.42178900 | -0.36795400 | -0.26871800 |
| O  | -0.47143400 | 3.05274100  | -0.03479200 | C  | -1.66497400 | 0.88356600  | 1.49408900  |
| C  | -1.57638600 | 3.95821800  | 0.14354300  | C  | 0.54197900  | -0.88589300 | -0.36529000 |
| H  | -1.13551500 | 4.95393100  | 0.09965600  | O  | -0.58377600 | 2.64646000  | -0.37388500 |
| H  | -2.31309300 | 3.82668400  | -0.65224200 | C  | -1.46400500 | 3.52041000  | -1.09313500 |
| H  | -2.05555800 | 3.79297700  | 1.11157000  | H  | -1.35190800 | 3.38177800  | -2.17142800 |
| H  | 1.15912500  | -2.47384900 | -0.49905300 | H  | -2.50851800 | 3.35279400  | -0.82078700 |
| C  | 3.75826300  | -1.73613600 | -0.26605600 | H  | -1.15953000 | 4.52773700  | -0.80454300 |
| H  | 3.62176200  | -2.80984800 | -0.36956200 | C  | 1.72017700  | -1.57961500 | -0.23090600 |
| C  | 5.01612800  | -1.20195000 | -0.16373000 | H  | 1.73578300  | -2.66278700 | -0.24603000 |
| H  | 5.88246300  | -1.85845700 | -0.18661800 | C  | 4.18766800  | -1.57526000 | 0.07749000  |
| C  | 5.21360400  | 0.20421300  | -0.02226200 | H  | 4.19381500  | -2.66447600 | 0.04597900  |
| H  | 6.22129600  | 0.60056500  | 0.06006600  | H  | 5.36235600  | -0.87780900 | 0.24977700  |
| C  | 4.12944500  | 1.04192900  | 0.00727200  | C  | 6.30184600  | -1.41347700 | 0.35471600  |
| H  | 4.26174400  | 2.11669400  | 0.11189900  | C  | 5.35592000  | 0.53732200  | 0.29123200  |
| C  | -2.22670400 | -1.55910700 | 2.16416400  | H  | 6.28966300  | 1.07556000  | 0.42736300  |
| H  | -2.87458000 | -2.21253300 | 1.55790300  | C  | 4.17176400  | 1.22819600  | 0.15925300  |
| H  | -2.14368900 | -2.07021800 | 3.13639200  | H  | 4.15921400  | 2.31493900  | 0.18906500  |
| H  | -2.78306500 | -0.63091400 | 2.38518900  | C  | -0.90929300 | 1.60982400  | 1.78850000  |
| C  | 0.01802100  | -0.52260800 | 2.57527000  | H  | -3.05284700 | 1.52512000  | 1.67097800  |
| H  | 1.06511100  | -0.44321300 | 2.26934100  | H  | -3.12913000 | 2.47663300  | 1.13485000  |
| H  | -0.36848400 | 0.49812700  | 2.70805200  | H  | -3.88884400 | 0.88950900  | 1.33035500  |
| H  | 0.00255400  | -0.99699600 | 3.56904500  | H  | -3.26759900 | 1.73154500  | 2.73257000  |
| H  | -0.36267200 | -2.28968800 | 1.38530200  | C  | -1.48839600 | -0.36694100 | 2.37528000  |

Structure 9'-TSCO-I

[B3LYP/6-31G(d)]

|    |             |             |             |
|----|-------------|-------------|-------------|
| Cl | -4.22305600 | -1.92755700 | -0.10478700 |
| C  | 0.45858500  | 0.42147600  | -0.40392600 |
| C  | 1.64525000  | 1.12305700  | -0.33225000 |
| C  | 2.89682400  | 0.48730700  | -0.12998800 |
| C  | 2.92959600  | -0.93436000 | 0.00263300  |
| C  | -0.82953000 | 1.13722900  | -0.68631800 |
| O  | -1.68475500 | 0.65310000  | -1.52453700 |
| O  | -0.70252900 | -1.68113100 | -0.26947500 |
| C  | -0.70810100 | -3.11959100 | -0.18683000 |
| H  | 1.61554900  | 2.20032700  | -0.44796800 |
| H  | -1.75718500 | -3.40932600 | -0.24759400 |
| H  | -0.28103300 | -3.44549800 | 0.76626400  |
| H  | -0.14383200 | -3.54088100 | -1.02350800 |
| Mg | -2.46100600 | -0.53704700 | -0.19631000 |
| C  | -1.81966100 | 0.83082100  | 1.46862900  |
| C  | 0.51259900  | -1.00406300 | -0.24945200 |
| O  | -0.68163300 | 2.48287300  | -0.61376700 |
| C  | -1.58939700 | 3.27128500  | -1.40039800 |
| H  | -1.33510400 | 4.30690300  | -1.17035200 |
| H  | -1.44552100 | 3.06968300  | -2.46496900 |
| H  | -2.62843700 | 3.06945900  | -1.13502100 |
| C  | 1.70548600  | -1.65636700 | -0.05600500 |
| H  | 1.74041400  | -2.73287900 | 0.06075900  |
| C  | 4.17864900  | -1.57805800 | 0.19612400  |
| H  | 4.20434000  | -2.66038400 | 0.29765400  |
| C  | 5.34367700  | -0.84381900 | 0.25528000  |
| H  | 6.29470000  | -1.34777500 | 0.40405100  |
| C  | 5.31253900  | 0.56525600  | 0.12324600  |
| H  | 6.23881200  | 1.13069500  | 0.17165600  |
| C  | 4.11343200  | 1.21605000  | -0.06573000 |
| H  | 4.08139400  | 2.29794300  | -0.16823200 |
| H  | -2.12166000 | -0.14490200 | 1.92035000  |
| C  | -0.67978500 | 1.35203200  | 2.32923000  |
| H  | -1.01089400 | 1.57071300  | 3.35742800  |
| H  | 0.14653700  | 0.63602100  | 2.40035200  |
| H  | -0.27472000 | 2.28531900  | 1.91809400  |
| C  | -3.03343100 | 1.76662900  | 1.50284600  |
| H  | -3.42592500 | 1.89654300  | 2.52440200  |
| H  | -2.75831900 | 2.76315500  | 1.13932500  |
| H  | -3.88415100 | 1.41989200  | 0.89409900  |

Structure 9'-TSCO-II

[B3LYP/6-31G(d)]

|    |             |             |             |
|----|-------------|-------------|-------------|
| Cl | -4.19552900 | -1.74950100 | -0.33487200 |
| C  | 0.51364900  | 0.54808800  | -0.34810500 |
| C  | 1.70843700  | 1.21441300  | -0.16742500 |
| C  | 2.94510500  | 0.53564300  | -0.01847300 |

Structure 9'-TSCO-III

[B3LYP/6-31G(d)]

|    |             |             |             |
|----|-------------|-------------|-------------|
| Cl | -4.35770300 | -1.66551200 | -0.09414300 |
| C  | 0.42304200  | 0.49283100  | -0.44046200 |
| C  | 1.63506100  | 1.14078100  | -0.30484900 |
| C  | 2.85769600  | 0.44315300  | -0.12903600 |
| C  | 2.83421000  | -0.98455000 | -0.09554600 |
| C  | -0.83948400 | 1.26834400  | -0.68117000 |
| O  | -1.73747100 | 0.83443100  | -1.51142700 |
| O  | -0.82085400 | -1.56622400 | -0.45581100 |
| C  | -0.88308700 | -3.00470400 | -0.43470400 |
| H  | 1.64993100  | 2.22330700  | -0.35662400 |
| H  | -1.94202300 | -3.25179300 | -0.51132200 |
| H  | -0.47456100 | -3.38876200 | 0.50496300  |
| H  | -0.33173400 | -3.41187600 | -1.28670100 |
| Mg | -2.53362400 | -0.36545400 | -0.23136700 |
| C  | -1.75380500 | 0.96593800  | 1.44693600  |
| O  | 0.42048200  | -0.94059700 | -0.37930500 |
| C  | -0.60438500 | 2.60406000  | -0.64824900 |
| C  | -1.63994600 | 3.43965500  | -1.17694100 |
| H  | -1.83169200 | 3.20541100  | -2.22587800 |
| H  | -2.56668500 | 3.32075600  | -0.60606700 |
| H  | -1.26706600 | 4.45953300  | -1.07115100 |
| C  | 1.58459000  | -1.65196000 | -0.21843500 |
| H  | 1.57644800  | -2.73446200 | -0.17552100 |
| C  | 4.05447800  | -1.68929000 | 0.06821000  |
| H  | 4.03638800  | -2.77624200 | 0.09436800  |
| C  | 5.24594800  | -1.00797400 | 0.19279900  |
| H  | 6.17447100  | -1.55822800 | 0.31779200  |
| C  | 5.27088700  | 0.40711100  | 0.15873200  |
| H  | 6.21749100  | 0.93079200  | 0.25771100  |
| C  | 4.10095700  | 1.11650700  | 0.00059000  |
| H  | 4.11262900  | 2.20328800  | -0.02745100 |
| C  | -1.44756200 | -0.26948800 | 2.31577400  |
| H  | -1.70730300 | -0.08682900 | 3.37078200  |
| H  | -1.99771400 | -1.18004100 | 2.03202900  |
| H  | -0.37782700 | -0.51316500 | 2.28729900  |
| C  | -1.14561100 | 2.20368600  | 2.08885300  |
| H  | -0.04920100 | 2.17613200  | 2.03568800  |
| H  | -1.47111900 | 3.13158000  | 1.61244700  |
| H  | -1.41398300 | 2.26985100  | 3.15527700  |
| H  | -2.85745200 | 1.12509500  | 1.42440500  |

Structure 11\_I

[B3LYP/6-31G(d)]

|   |             |             |             |
|---|-------------|-------------|-------------|
| C | -0.54400400 | -1.25430100 | -0.14042600 |
|---|-------------|-------------|-------------|

|                                   |             |             |             |                                        |             |             |             |
|-----------------------------------|-------------|-------------|-------------|----------------------------------------|-------------|-------------|-------------|
| C                                 | 0.08403900  | -2.48258200 | 0.21698700  | C                                      | 3.72593700  | -1.46669400 | 0.29601500  |
| C                                 | 1.44609100  | -2.58306200 | 0.33174400  | H                                      | 4.17428700  | -2.39982400 | 0.62774700  |
| C                                 | 2.28247400  | -1.45917000 | 0.10328800  | H                                      | 2.10642000  | 1.84410600  | -0.94421300 |
| C                                 | 1.68100100  | -0.20680600 | -0.24447300 | O                                      | -2.60200400 | -2.19809100 | 0.28109900  |
| C                                 | -2.02776400 | -1.20635400 | -0.28895700 | C                                      | -4.02439800 | -2.26164500 | 0.08860300  |
| O                                 | -2.68338800 | -0.29625600 | -0.75978300 | H                                      | -4.36542100 | -3.08758700 | 0.71354300  |
| O                                 | -0.27347000 | 1.06964600  | -0.77943900 | H                                      | -4.49063400 | -1.32309100 | 0.39809500  |
| H                                 | -0.54463600 | -3.34600200 | 0.39295900  | H                                      | -4.26268200 | -2.44812400 | -0.96201400 |
| H                                 | 1.90214000  | -3.53201000 | 0.60139100  | S                                      | -1.15943800 | 2.03980600  | 0.24762300  |
| C                                 | 0.26115000  | -0.14155200 | -0.36025000 | O                                      | -2.03842100 | 2.81163200  | -0.61149900 |
| C                                 | 2.51332100  | 0.92378300  | -0.46795300 | O                                      | -1.64909900 | 1.20630500  | 1.33966400  |
| C                                 | 3.88073900  | 0.81296200  | -0.35217900 | C                                      | 0.11532500  | 3.13134500  | 0.90200800  |
| H                                 | 4.50779200  | 1.68350100  | -0.52221000 | H                                      | -0.37774800 | 3.79934800  | 1.61197600  |
| C                                 | 4.47801800  | -0.42397900 | -0.01058000 | H                                      | 0.87406500  | 2.53073100  | 1.40548900  |
| H                                 | 5.55886100  | -0.49354400 | 0.07673100  | H                                      | 0.54295600  | 3.70159900  | 0.07652100  |
| C                                 | 3.69527800  | -1.53415300 | 0.21254200  |                                        |             |             |             |
| H                                 | 4.14762700  | -2.48658900 | 0.47714500  | Structure 11_IV [B3LYP/6-31G(d)]       |             |             |             |
| H                                 | 2.05708400  | 1.87364800  | -0.71887500 | C                                      | 0.24810600  | 1.42778900  | -0.00138500 |
| O                                 | -2.60427400 | -2.34724900 | 0.15647900  | C                                      | -0.61223700 | 2.47898400  | 0.42090200  |
| C                                 | -4.03435100 | -2.39617900 | 0.04576800  | C                                      | -1.97016500 | 2.31267800  | 0.04951500  |
| H                                 | -4.32319400 | -3.36725900 | 0.44873800  | C                                      | -2.56743100 | 1.07479800  | 0.13951100  |
| H                                 | -4.49038400 | -1.58844600 | 0.62403700  | C                                      | -1.72687200 | -0.00862900 | -0.27390400 |
| H                                 | -4.34332500 | -2.30498500 | -0.99897100 | C                                      | -1.70247700 | 1.78342900  | -0.06785200 |
| S                                 | -0.81561300 | 2.18171500  | 0.36548800  | O                                      | 2.15963700  | 2.78911500  | 0.43835100  |
| O                                 | -1.22714000 | 1.46131300  | 1.56516200  | O                                      | 0.44051200  | -0.89950300 | -0.72400400 |
| O                                 | 0.18331300  | 3.24448100  | 0.44332100  | H                                      | -0.14404900 | 3.42101800  | 0.68294600  |
| C                                 | -2.23460600 | 2.77358200  | -0.55692400 | H                                      | -2.60675400 | 3.13115900  | 0.82039000  |
| H                                 | -2.69629800 | 3.55436500  | 0.05143500  | C                                      | -0.31344600 | 0.19509500  | -0.30727700 |
| H                                 | -1.87519000 | 3.18529800  | -1.50112400 | C                                      | -2.32970000 | -1.23873900 | -0.65363100 |
| H                                 | -2.89931200 | 1.92597100  | -0.71651100 | C                                      | -3.69702500 | -1.39540900 | -0.60600500 |
|                                   |             |             |             | H                                      | -4.14403400 | -2.33876100 | -0.90720200 |
| Structure 11_II [B3LYP/6-31G(d)]  |             |             |             | C                                      | -4.52720500 | -0.33205800 | -0.17821900 |
| C                                 | 0.29094400  | 1.45300600  | -0.00357600 | H                                      | -5.60428500 | -0.46983400 | -0.14335400 |
| C                                 | -0.56824800 | 2.52591400  | 0.36867900  | C                                      | -3.97246600 | 0.87512700  | 0.18144100  |
| C                                 | -1.92915000 | 2.37499600  | 0.40870500  | H                                      | -4.60442900 | 1.70009900  | 0.50046500  |
| C                                 | -2.53244600 | 1.13053100  | 0.08801500  | H                                      | -1.69850400 | -2.04423900 | -1.00996400 |
| C                                 | -1.69449700 | 0.02356500  | -0.26528100 | O                                      | 2.43475000  | 0.91275600  | -0.78101000 |
| C                                 | 1.74638300  | 1.79839900  | -0.02628800 | C                                      | 3.84711600  | 1.17515600  | -0.83037700 |
| O                                 | 2.18666200  | 2.80594200  | 0.49139200  | H                                      | 4.27412400  | 0.32518500  | -1.36120400 |
| O                                 | 0.49375400  | -0.86129000 | -0.70718900 | H                                      | 4.04121000  | 2.10982300  | -1.36325900 |
| H                                 | -0.09988300 | 3.47091900  | 0.61799200  | H                                      | 4.25436900  | 1.24444200  | 0.18098100  |
| H                                 | -2.56429900 | 3.21130600  | 0.68852300  | S                                      | 1.48165000  | -1.67950400 | 0.34259500  |
| C                                 | -0.28226700 | 0.22394000  | -0.29948500 | O                                      | 2.59528600  | -2.13802600 | -0.47287500 |
| C                                 | -2.29547000 | -1.22622300 | -0.57734300 | O                                      | 1.66883800  | -0.86068700 | 1.53456400  |
| C                                 | -3.66439300 | -1.36805500 | -0.54306100 | C                                      | 0.46569300  | -3.10083700 | 0.77616200  |
| H                                 | -4.11221100 | -2.32848400 | -0.78190700 | H                                      | 1.05551800  | -3.71056200 | 1.46442300  |
| C                                 | -4.49449700 | -0.27565100 | -0.19576200 | H                                      | -0.44643600 | -2.74988000 | 1.26062000  |
| H                                 | -5.57302500 | -0.40535000 | -0.17209000 | H                                      | 0.24361200  | -3.65992500 | -0.13367600 |
| C                                 | -3.93922300 | 0.94518900  | 0.11344300  |                                        |             |             |             |
| H                                 | -4.57030500 | 1.78807800  | 0.38363500  | Structure 11·EtMgCl_I [B3LYP/6-31G(d)] |             |             |             |
| H                                 | -1.66290200 | -2.06739100 | -0.83174200 | C                                      | 0.36651200  | 1.31821200  | -0.70386600 |
| O                                 | 2.53140600  | 0.94189300  | -0.71873500 | C                                      | 1.36856200  | 2.27797900  | -1.01440800 |
| C                                 | 3.91740100  | 1.32470900  | -0.77035300 | C                                      | 2.69011600  | 2.01473200  | -0.75803000 |
| H                                 | 4.40394200  | 0.57536300  | -1.39668600 | C                                      | 3.09316600  | 0.78367000  | -0.17630700 |
| H                                 | 4.02539100  | 2.31830300  | -1.21166000 | C                                      | 2.10349200  | -0.21059700 | 0.12084600  |
| H                                 | 4.35131800  | 1.33139200  | 0.23275200  | C                                      | -1.06218800 | 1.68026100  | -0.86191500 |
| S                                 | 1.15061800  | -1.87291100 | 0.46239800  | O                                      | -1.97222600 | 1.28145500  | -0.12790700 |
| O                                 | 1.60207200  | -1.06699900 | 1.59096300  | O                                      | -0.21987700 | -0.89682400 | 0.06812700  |
| O                                 | 0.23926200  | -2.99483500 | 0.66869000  | Cl                                     | -3.57228800 | -1.39421900 | 1.52290600  |
| C                                 | 2.54073700  | -2.42046900 | -0.53083100 | H                                      | 1.06417000  | 3.22661800  | -1.44073800 |
| H                                 | 3.09652100  | -3.13890700 | 0.07528200  | H                                      | 3.44783400  | 2.75795000  | -0.98996000 |
| H                                 | 2.15272100  | -2.89690200 | -1.43208200 | Mg                                     | -1.81121800 | 0.08257200  | 1.56136100  |
| H                                 | 3.14594600  | -1.54853900 | -0.77252500 | C                                      | -0.59734300 | 0.91873800  | 3.08959800  |
|                                   |             |             |             | H                                      | -1.05882800 | 0.66395700  | 4.05702000  |
| Structure 11_III [B3LYP/6-31G(d)] |             |             |             | C                                      | 0.74734300  | 0.09051300  | -0.17344900 |
| C                                 | -0.50424300 | -1.22446400 | -0.15083400 | C                                      | 2.50832800  | -1.43895500 | 0.70740400  |
| C                                 | 0.11795200  | -2.42684100 | 0.28693000  | C                                      | 3.83488300  | -1.67208300 | 0.98612800  |
| C                                 | 1.47748400  | -2.51340400 | 0.44634300  | H                                      | 4.13384800  | -2.61115500 | 1.44231100  |
| C                                 | 2.31343300  | -1.40162500 | 0.16542600  | C                                      | 4.81651700  | -0.69698600 | 0.68441900  |
| C                                 | 1.71465000  | -0.17355800 | -0.26461700 | H                                      | 5.86020800  | -0.89951800 | 0.90709400  |
| C                                 | -1.97986100 | -1.20590700 | -0.39735700 | C                                      | 4.45301500  | 0.50264800  | 0.11694200  |
| O                                 | -2.56326700 | -0.44067300 | -1.13370800 | H                                      | 5.20200500  | 1.25588200  | -0.11241700 |
| O                                 | -0.23078300 | 1.10528000  | -0.80258700 | H                                      | 1.75790700  | -2.18313500 | 0.94429200  |
| H                                 | -0.51479700 | -3.28243300 | 0.48870800  | O                                      | -1.28564600 | 2.53806700  | -1.84537300 |
| H                                 | 1.93125900  | -3.44233000 | 0.78135000  | C                                      | -2.65595700 | 2.96411700  | -2.03428300 |
| C                                 | 0.29375800  | -0.11232000 | -0.38606200 | H                                      | -2.62483800 | 3.63927400  | -2.88816600 |
| C                                 | 2.55576600  | 0.92993300  | -0.57431300 | H                                      | -3.28629200 | 2.09749700  | -2.24117100 |
| C                                 | 3.92262800  | 0.82891800  | -0.44239200 | C                                      | -3.01586600 | 3.47882000  | -1.14089500 |
| H                                 | 4.55397400  | 1.67747700  | -0.69087900 | H                                      | -0.36777900 | 2.44237300  | 3.04104500  |
| C                                 | 4.51435900  | -0.37716400 | 0.00392200  | H                                      | -1.31333900 | 2.99943400  | 3.10258700  |
| H                                 | 5.59404800  | -0.44183800 | 0.10592600  | H                                      | 0.26724400  | 2.81645300  | 3.86113200  |



|   |             |             |             |   |             |             |             |
|---|-------------|-------------|-------------|---|-------------|-------------|-------------|
| H | 0.12036300  | 2.75702700  | 2.10692400  | S | 0.43056600  | -1.07087000 | 2.06834800  |
| H | 0.38310700  | 0.41499200  | 3.11304100  | O | 1.28859500  | -0.00089000 | 2.56105100  |
| S | -0.57112000 | -1.87323500 | -1.35332300 | O | -0.88503300 | -1.30078400 | 2.64923000  |
| O | -1.50939300 | -1.10926100 | -2.16511600 | C | 1.33610600  | -2.60253400 | 1.89223100  |
| O | 0.71488800  | -2.29303100 | -1.89284000 | H | 1.63661300  | -2.88241200 | 2.90509500  |
| C | -1.38853800 | -3.21969400 | -0.50669600 | H | 0.66211800  | -3.34807900 | 1.46851800  |
| H | -2.22031300 | -2.81493300 | 0.08058800  | H | 2.20736900  | -2.42899200 | 1.25093800  |
| H | -1.74645200 | -3.88669100 | -1.29510400 | C | 1.43568000  | -0.60137100 | -4.41548000 |
| H | -0.65206400 | -3.72264400 | 0.12117100  | H | 2.24501900  | 0.12317100  | -4.58207300 |

Structure 11·EtMgCl\_II [B3LYP/6-31G(d)]

|    |             |             |             |
|----|-------------|-------------|-------------|
| Cl | 3.56290300  | 1.91574800  | 0.62834100  |
| C  | -0.33430000 | -1.60878200 | 0.18045900  |
| C  | -1.33548700 | -2.58330800 | 0.44206200  |
| C  | -2.66124900 | -2.23160600 | 0.46655800  |
| C  | -3.06908800 | -0.89180600 | 0.23247700  |
| C  | -2.07936200 | 0.10277600  | -0.06409100 |
| C  | 1.09473300  | -1.98045700 | 0.30570900  |
| O  | 1.98050600  | -1.22593400 | 0.72108300  |
| O  | 0.25253600  | 0.65740300  | -0.42278100 |
| H  | -1.02810200 | -3.60336400 | 0.64067400  |
| H  | -3.41913000 | -2.98070700 | 0.67818900  |
| Mg | 1.76752700  | 0.71939400  | 1.42469700  |
| C  | 0.50566600  | 0.88856300  | 3.12178700  |
| H  | 1.14544000  | 0.77245600  | 4.01278400  |
| C  | -0.71858800 | -0.30090700 | -0.09369900 |
| C  | -2.48931800 | 1.44304600  | -0.29451500 |
| C  | -3.82063100 | 1.78272100  | -0.23124100 |
| H  | -4.12374700 | 2.81184300  | -0.39941700 |
| C  | -4.80173100 | 0.80188600  | 0.05321300  |
| H  | -5.84896900 | 1.08718400  | 0.09540200  |
| C  | -4.43367700 | -0.50453800 | 0.27898100  |
| H  | -5.18260600 | -1.26005400 | 0.50094200  |
| H  | -1.73954500 | 2.19523100  | -0.50625700 |
| O  | 1.34550900  | -3.24091600 | -0.01236300 |
| C  | 2.71759600  | -3.68163300 | 0.12218200  |
| H  | 2.71041400  | -4.72325100 | -0.19547100 |
| H  | 3.36248900  | -3.07933000 | -0.52012200 |
| H  | 3.04143500  | -3.59092000 | 1.16114000  |
| S  | 0.66626800  | 0.64889800  | -2.13345400 |
| O  | 1.60135900  | -0.45081200 | -2.33269500 |
| O  | -0.59375000 | 0.69967400  | -2.86197600 |
| C  | 1.50051100  | 2.23002800  | -2.17483700 |
| H  | 1.88710000  | 2.32933500  | -3.19233100 |
| H  | 0.76515300  | 3.00703300  | -1.96244000 |
| H  | 2.31159600  | 2.22280000  | -1.43836400 |
| C  | -0.29134800 | 2.20075100  | 3.26711400  |
| H  | 0.36796100  | 3.07936600  | 3.26743600  |
| H  | -1.00250900 | 2.34156200  | 2.44047100  |
| H  | -0.88244600 | 2.25239600  | 4.19652500  |
| H  | -0.19613800 | 0.03989600  | 3.17485400  |

Structure 11·EtMgCl\_III [B3LYP/6-31G(d)]

|    |             |             |             |
|----|-------------|-------------|-------------|
| Cl | 3.62178300  | -1.72436000 | -0.60846500 |
| C  | -0.44135300 | 1.55841800  | 0.11994400  |
| C  | -1.45047700 | 2.54340400  | -0.05831700 |
| C  | -2.75417700 | 2.17473100  | -0.27381000 |
| C  | -3.13079900 | 0.80663500  | -0.32474700 |
| C  | -2.13495300 | -0.20475900 | -0.11992500 |
| C  | 0.97756800  | 1.97641300  | 0.21292700  |
| O  | 1.92807200  | 1.33424500  | -0.24568700 |
| O  | 0.17381200  | -0.76719400 | 0.35668400  |
| H  | -1.16552500 | 3.58884800  | -0.03845500 |
| H  | -3.51743300 | 2.93407900  | -0.41926900 |
| Mg | 1.85497800  | -0.44135100 | -1.32812300 |
| C  | 0.68478300  | -0.33062400 | -3.09559500 |
| H  | 0.19989000  | 0.65806200  | -3.16113300 |
| C  | -0.79894500 | 0.21483500  | 0.11441800  |
| C  | -2.51294600 | -1.57256100 | -0.17567600 |
| C  | -3.81979200 | -1.92245400 | -0.42326800 |
| H  | -4.09791500 | -2.97106600 | -0.47215400 |
| C  | -4.80809600 | -0.92669100 | -0.61651500 |
| H  | -5.83622500 | -1.22100800 | -0.80681900 |
| C  | -4.47046700 | 0.40629600  | -0.56842000 |
| H  | -5.22452400 | 1.17406400  | -0.71987900 |
| H  | -1.75707600 | -2.33485400 | -0.03290300 |
| O  | 1.14625700  | 3.15617400  | 0.78923800  |
| C  | 2.50652900  | 3.64166000  | 0.88462800  |
| H  | 2.42721500  | 4.60099900  | 1.39384600  |
| H  | 3.10867600  | 2.93857300  | 1.46277700  |
| H  | 2.93380300  | 3.76166400  | -0.11314700 |

Structure 11·EtMgCl (b)\_I [B3LYP/6-31G(d)]

|    |             |             |             |
|----|-------------|-------------|-------------|
| Cl | -4.14638400 | 0.07261800  | -1.56353500 |
| C  | 0.89064600  | 1.38880400  | 0.00067100  |
| C  | 1.76961100  | 2.49538600  | -0.17526700 |
| C  | 3.12928500  | 2.34586600  | -0.09145800 |
| C  | 3.70752900  | 1.08046300  | 0.18867900  |
| C  | 2.84983300  | -0.05373900 | 0.36395400  |
| C  | -0.57893900 | 1.61745400  | -0.04002900 |
| O  | -1.41163700 | 0.78994400  | 0.32246100  |
| O  | 0.66156700  | -1.00681100 | 0.42589700  |
| H  | 1.33434900  | 3.46624400  | -0.37529500 |
| H  | 3.78155100  | 3.20316400  | -0.23190100 |
| Mg | -3.03388200 | -0.55992600 | -0.56126200 |
| C  | -3.62455300 | -1.08463600 | 2.33041800  |
| H  | -2.74100700 | -1.41484700 | 2.90336900  |
| C  | 1.44429900  | 0.13456600  | 0.23803800  |
| C  | 3.42900700  | -1.31545200 | 0.67028800  |
| C  | 4.79461800  | -1.45029200 | 0.77729800  |
| H  | 5.22496600  | -2.41747600 | 1.02036300  |
| C  | 5.64468900  | -0.33480300 | 0.58390100  |
| H  | 6.72050100  | -0.45764700 | 0.66892400  |
| C  | 5.11111500  | 0.90173800  | 0.30071600  |
| H  | 5.75777700  | 1.76408200  | 0.16224900  |
| H  | 2.78008300  | -2.16441500 | 0.84987000  |
| O  | -0.90372400 | 2.82635400  | -0.47022000 |
| C  | -2.31945500 | 3.15448200  | -0.52420400 |
| H  | -2.35668200 | 4.13344700  | -0.99990800 |
| H  | -2.86185100 | 2.40377900  | -1.10332300 |
| H  | -2.71844600 | 3.20435900  | 0.49207400  |
| S  | -0.17360200 | -1.67000600 | -0.86279700 |
| O  | -1.51241800 | -1.98017100 | -0.33786100 |
| O  | 0.01462100  | -0.84622800 | -2.04411800 |
| C  | 0.67670700  | -3.23960300 | -1.03582500 |
| H  | 0.14384100  | -3.79552700 | -1.81075300 |
| H  | 1.70693900  | -3.04476000 | -1.33635300 |
| C  | 0.62513200  | -3.76579900 | -0.08158400 |
| H  | -4.35471000 | 0.00620500  | 0.14077900  |
| H  | -3.73219600 | 0.90353400  | 3.27418700  |
| H  | -5.27505200 | 0.33692100  | 2.64005800  |
| H  | -4.64939300 | -0.31816500 | 4.15351100  |
| H  | -4.27312700 | -1.97553200 | 2.28720100  |

Structure 11·EtMgCl (b)\_II [B3LYP/6-31G(d)]

|    |             |             |             |
|----|-------------|-------------|-------------|
| Cl | -4.37889800 | 0.51719700  | -1.21972400 |
| C  | 0.84586900  | 1.43208900  | 0.20027100  |
| C  | 1.75765000  | 2.52583100  | 0.18746100  |
| C  | 3.11307800  | 2.32309400  | 0.19170500  |
| C  | 3.65424700  | 1.01136400  | 0.22282700  |
| C  | 2.76227100  | -0.10987300 | 0.22924000  |
| C  | -0.61523300 | 1.70582900  | 0.25601200  |
| O  | -1.46316300 | 0.85473900  | 0.51302900  |
| O  | 0.54322500  | -0.99160100 | 0.20802300  |
| H  | 1.35159700  | 3.52942600  | 0.17787100  |
| H  | 3.79106700  | 3.17183500  | 0.17932100  |
| Mg | -3.10822900 | -0.46624900 | 0.43855000  |
| C  | -3.52204000 | -1.36078400 | 2.31794800  |
| H  | -4.34346500 | -2.08652700 | 2.20015300  |
| C  | 1.36132200  | 0.13999700  | 0.19312200  |
| C  | 3.30479100  | -1.42271500 | 0.28669700  |
| C  | 4.66733700  | -1.61523700 | 0.31521000  |
| H  | 5.06986900  | -2.62265500 | 0.36796500  |
| C  | 5.55053000  | -0.50913100 | 0.28800600  |
| H  | 6.62337700  | -0.67722500 | 0.30847800  |
| C  | 5.05331600  | 0.77348600  | 0.24725300  |
| H  | 5.72613700  | 1.62685500  | 0.23766200  |
| H  | 2.63160900  | -2.27012600 | 0.34021400  |
| O  | -0.91371800 | 2.97706100  | 0.03821800  |
| C  | -2.31871600 | 3.34782100  | 0.09451300  |

|   |             |             |             |    |             |             |             |
|---|-------------|-------------|-------------|----|-------------|-------------|-------------|
| H | -2.34161100 | 4.38823600  | -0.22652600 | C  | -2.04014800 | 2.39523900  | -1.87279300 |
| H | -2.90876800 | 2.70832000  | -0.56561300 | H  | -2.08560700 | 3.09357300  | -2.70785600 |
| H | -2.67685400 | 3.25387000  | 1.12279200  | H  | -2.54223300 | 1.45903600  | -2.12182800 |
| S | -0.35306700 | -1.39461600 | -1.14451300 | H  | -2.49287700 | 2.82917100  | -0.97860100 |
| O | -1.68497300 | -1.75229200 | -0.63353000 | H  | -4.29852100 | 2.64226200  | 0.82003000  |
| O | -0.17488400 | -0.38178000 | -2.17069500 | Mg | -2.88192100 | 0.31069500  | 0.94401500  |
| C | 0.43650400  | -2.93285100 | -1.61970900 | O  | -4.01479700 | -0.30397700 | -0.78946800 |
| H | -0.13936800 | -3.32926800 | -2.45918800 | C  | -3.62168200 | -1.47918000 | -1.51772800 |
| H | 1.46292500  | -2.71800900 | -1.91957400 | H  | -2.53796000 | -1.44175400 | -1.63344200 |
| H | 0.39642800  | -3.61578300 | -0.76993600 | H  | -3.90316800 | -2.38059900 | -0.96307900 |
| C | -2.34010100 | -2.06376500 | 3.01495100  | H  | -4.10396100 | -1.47485500 | -2.50326900 |
| H | -1.93110800 | -2.87850300 | 2.39958300  | C  | -5.43516800 | -0.22461800 | -0.60866700 |
| H | -1.50628700 | -1.37237000 | 3.20576100  | H  | -5.93164800 | -0.18153900 | -1.58597300 |
| H | -2.60197900 | -2.51162200 | 3.98894800  | H  | -5.79923800 | -1.09285200 | -0.04626900 |
| H | -3.93131500 | -0.59987600 | 3.00360300  | H  | -5.63426100 | 0.69080800  | -0.04963500 |

Structure 11·EtMgCl (b)\_III [B3LYP/6-31G(d)]

|    |             |             |             |   |             |             |             |
|----|-------------|-------------|-------------|---|-------------|-------------|-------------|
| Cl | 2.95278500  | -0.06277000 | 2.20108900  | O | 1.14232500  | -0.97371400 | 0.43146800  |
| C  | -0.73996300 | 1.45170100  | -0.15507700 | O | 0.88599500  | -2.16257200 | -0.74408200 |
| C  | -1.56454700 | 2.56240100  | 0.18747200  | O | -0.06559500 | -1.64893300 | -1.72969200 |
| C  | -2.92810800 | 2.44163200  | 0.25325600  | O | 2.18511900  | -2.65610300 | -1.19047300 |
| C  | -3.56903000 | 1.20767200  | -0.03496200 | C | 0.09672700  | -3.32834500 | 0.35755700  |
| C  | -2.76808000 | 0.07109700  | -0.38549000 | H | -0.19308500 | -4.18073500 | -0.26138800 |
| C  | 0.73336700  | 1.63504800  | -0.23872700 | H | 0.82620400  | -3.63196700 | 1.10951800  |
| O  | 1.52849900  | 0.75928400  | -0.57213000 | H | -0.77728400 | -2.85464700 | 0.81771800  |
| O  | -0.59693900 | -0.86921300 | -0.81759800 | C | -2.67703500 | 3.20420300  | 2.13154600  |
| H  | -1.08608000 | 3.51082700  | 0.39555800  | H | -2.11042500 | 2.82032600  | 2.99101300  |
| H  | -3.53780700 | 3.30014400  | 0.52077200  | H | -1.92992700 | 3.46865700  | 1.36660400  |
| Mg | 2.97726700  | -0.67406100 | -0.06730400 | H | -3.13235800 | 4.15461400  | 2.45673400  |
| C  | 4.49736200  | -0.96394900 | -1.51089000 |   |             |             |             |
| H  | 4.08798500  | -1.52943500 | -2.36406000 |   |             |             |             |
| C  | -1.35213300 | 0.22621000  | -0.41195000 |   |             |             |             |
| C  | -3.40682700 | -1.15947500 | -0.70326700 |   |             |             |             |
| C  | -4.77947300 | -1.25743500 | -0.65870500 |   |             |             |             |
| H  | -5.25930000 | -2.19932400 | -0.90742600 |   |             |             |             |
| C  | -5.57218000 | -0.14128600 | -0.29892800 |   |             |             |             |
| H  | -6.65368100 | -0.23806600 | -0.26873900 |   |             |             |             |
| C  | -4.97969700 | 1.06416000  | 0.00371600  |   |             |             |             |
| H  | -5.58441000 | 1.92631400  | 0.27202000  |   |             |             |             |
| H  | -2.80475400 | -2.01423900 | -0.98724800 |   |             |             |             |
| O  | 1.11643800  | 2.86676100  | 0.07152400  |   |             |             |             |
| C  | 2.54355000  | 3.13000700  | 0.08482800  |   |             |             |             |
| H  | 2.62694000  | 4.19300400  | 0.30679700  |   |             |             |             |
| H  | 3.01592500  | 2.52572100  | 0.86242400  |   |             |             |             |
| H  | 2.97571200  | 2.90055200  | -0.89134300 |   |             |             |             |
| S  | -0.04259200 | -2.07025900 | 0.20318300  |   |             |             |             |
| O  | 1.39976400  | -2.15739500 | -0.09153200 |   |             |             |             |
| O  | -0.85857700 | -3.25074300 | -0.02464500 |   |             |             |             |
| C  | -0.28109500 | -1.45729700 | 1.87353100  |   |             |             |             |
| H  | -1.32728000 | -1.17682600 | 2.00310900  |   |             |             |             |
| H  | -0.03108100 | -2.30824900 | 2.51190500  |   |             |             |             |
| H  | 0.42098100  | -0.64133500 | 2.06622200  |   |             |             |             |
| C  | 5.15452100  | 0.32556800  | -2.04547400 |   |             |             |             |
| H  | 4.41875700  | 0.99439400  | -2.51718300 |   |             |             |             |
| H  | 5.63495000  | 0.90230100  | -1.24208200 |   |             |             |             |
| H  | 5.93400700  | 0.14166800  | -2.80378100 |   |             |             |             |
| H  | 5.28658900  | -1.61335500 | -1.09971400 |   |             |             |             |

Structure 11·EtMgCl (DME)\_I [B3LYP/6-31G(d)]

|    |             |             |             |   |             |             |             |
|----|-------------|-------------|-------------|---|-------------|-------------|-------------|
| C  | 1.18993500  | 1.25615100  | -0.51000700 | O | -3.93252300 | 1.44087900  | 0.38783800  |
| C  | 1.95856100  | 2.40226500  | -0.86754700 | C | -5.18172800 | 0.81776600  | 0.07101800  |
| C  | 3.30595500  | 2.45649600  | -0.62525100 | H | -5.04459500 | -0.25350300 | 0.21765900  |
| C  | 3.98153200  | 1.36922700  | -0.01150900 | H | -5.96620900 | 1.18817900  | 0.74275000  |
| C  | 3.23901600  | 0.19413200  | 0.33630900  | H | -5.45919200 | 1.03447500  | -0.96915100 |
| C  | -0.27947000 | 1.30140700  | -0.70816100 | C | -3.97718500 | 2.86518600  | 0.30579900  |
| O  | -1.10153900 | 0.65775700  | -0.05744900 | H | -4.21472800 | 3.18199600  | -0.71862100 |
| Cl | -2.73836000 | -1.78362900 | 1.94606900  | H | -4.73455600 | 3.26218900  | 0.99360900  |
| H  | 1.44909600  | 3.24241000  | -1.32280300 | O | -2.99301900 | 3.23453100  | 0.59544200  |
| H  | 3.87259200  | 3.34362100  | -0.89448300 | H | 0.75997500  | -0.96952200 | 0.41964500  |
| C  | -3.69656500 | 2.16613700  | 1.61678600  | S | 0.91178600  | -2.51611400 | -0.28227200 |
| H  | -4.42340400 | 1.97449900  | 2.42325100  | O | 0.18083100  | -2.50280100 | -1.54819500 |
| C  | 1.84123600  | 0.16612100  | 0.06149500  | O | 2.32293700  | -2.88684100 | -0.25976700 |
| C  | 3.91406400  | -0.89255300 | 0.95468900  | C | -0.00051700 | -3.39452900 | 0.97878400  |
| C  | 5.26275000  | -0.81681700 | 1.21548900  | H | -0.04064600 | -4.43501300 | 0.64774200  |
| H  | 5.76812200  | -1.65208500 | 1.69136400  | H | 0.55002000  | -3.30978300 | 1.91663700  |
| C  | 5.99950700  | 0.34090600  | 0.86746500  | H | -1.00379700 | -2.96488600 | 1.06499500  |
| H  | 7.06452600  | 0.38331400  | 1.07773200  | C | -0.18846400 | 1.30624300  | 3.28262700  |
| C  | 5.37222700  | 1.40892000  | 0.26746400  | H | -0.80373000 | 0.75047900  | 4.00340600  |
| H  | 5.93225200  | 2.30110200  | -0.00023400 | H | 0.58530300  | 0.60883500  | 2.93352700  |
| H  | 3.35207300  | -1.77880200 | 1.21944100  | H | 0.33441200  | 2.09170100  | 3.85423100  |
| O  | -0.63030200 | 2.16781800  | -1.65606300 |   |             |             |             |

Structure 11·EtMgCl (DME)\_II [B3LYP/6-31G(d)]

|    |             |             |             |  |  |  |  |
|----|-------------|-------------|-------------|--|--|--|--|
| C  | 0.77252000  | 0.67342200  | -1.34176800 |  |  |  |  |
| C  | 1.45203400  | 1.70241700  | -2.04914100 |  |  |  |  |
| C  | 2.68787100  | 2.13303800  | -1.63800100 |  |  |  |  |
| C  | 3.32848200  | 1.54910800  | -0.51302700 |  |  |  |  |
| C  | 2.67930100  | 0.48050300  | 0.18817200  |  |  |  |  |
| C  | -0.60243200 | 0.30121700  | -1.75623900 |  |  |  |  |
| O  | -1.55478600 | 0.12381300  | -0.99508000 |  |  |  |  |
| Cl | -3.08488900 | -1.65817500 | 1.53994900  |  |  |  |  |
| H  | 0.96747000  | 2.15152100  | -2.90903500 |  |  |  |  |
| H  | 3.19303500  | 2.93183400  | -2.17410200 |  |  |  |  |
| C  | -1.03737200 | 1.85225900  | 2.11532200  |  |  |  |  |
| H  | -1.74481100 | 2.58932500  | 2.53615100  |  |  |  |  |
| C  | 1.39484200  | 0.06567000  | -0.26069800 |  |  |  |  |
| C  | 3.32849600  | -0.11444500 | 1.30225700  |  |  |  |  |
| C  | 4.56306400  | 0.33656400  | 1.70893300  |  |  |  |  |
| H  | 5.04920200  | -0.12098800 | 2.56557100  |  |  |  |  |
| C  | 5.20710400  | 1.39272600  | 1.02030600  |  |  |  |  |
| H  | 6.18269300  | 1.73520900  | 1.35380000  |  |  |  |  |
| C  | 4.60365800  | 1.98372800  | -0.06609400 |  |  |  |  |
| H  | 5.09464600  | 2.79380200  | -0.59916900 |  |  |  |  |
| H  | 2.83654700  | -0.92329800 | 1.87533300  |  |  |  |  |
| O  | -0.73953300 | 0.23381200  | -3.07448600 |  |  |  |  |
| C  | -2.03819600 | -0.15482700 | -3.57130200 |  |  |  |  |
| H  | -1.93406500 | -0.16723700 | -4.65555300 |  |  |  |  |
| H  | -2.29260800 | -1.14628700 | -3.19195100 |  |  |  |  |
| H  | -2.79693500 | 0.56744400  | -3.26110600 |  |  |  |  |
| H  | -0.38034400 | 2.45163500  | 1.46054000  |  |  |  |  |
| Mg | -2.14780200 | 0.40863600  | 1.00008300  |  |  |  |  |
| O  | -3.93252300 | 1.44087900  | 0.38783800  |  |  |  |  |
| C  | -5.18172800 | 0.81776600  | 0.07101800  |  |  |  |  |
| H  | -5.04459500 | -0.25350300 | 0.21765900  |  |  |  |  |
| H  | -5.96620900 | 1.18817900  | 0.74275000  |  |  |  |  |
| H  | -5.45919200 | 1.03447500  | -0.96915100 |  |  |  |  |
| C  | -3.97718500 | 2.86518600  | 0.30579900  |  |  |  |  |
| H  | -4.21472800 | 3.18199600  | -0.71862100 |  |  |  |  |
| H  | -4.73455600 | 3.26218900  | 0.99360900  |  |  |  |  |
| O  | -2.99301900 | 3.23453100  | 0.59544200  |  |  |  |  |
| H  | 0.75997500  | -0.96952200 | 0.41964500  |  |  |  |  |
| S  | 0.91178600  | -2.51611400 | -0.28227200 |  |  |  |  |
| O  | 0.18083100  | -2.50280100 | -1.54819500 |  |  |  |  |
| O  | 2.32293700  | -2.88684100 | -0.25976700 |  |  |  |  |
| C  | -0.00051700 | -3.39452900 | 0.97878400  |  |  |  |  |
| H  | -0.04064600 | -4.43501300 | 0.64774200  |  |  |  |  |
| H  | 0.55002000  | -3.30978300 | 1.91663700  |  |  |  |  |
| H  | -1.00379700 | -2.96488600 | 1.06499500  |  |  |  |  |
| C  | -0.18846400 | 1.30624300  | 3.28262700  |  |  |  |  |
| H  | -0.80373000 | 0.75047900  | 4.00340600  |  |  |  |  |
| H  | 0.58530300  | 0.60883500  | 2.93352700  |  |  |  |  |
| H  | 0.33441200  | 2.09170100  | 3.85423100  |  |  |  |  |

Structure 11·EtMgCl (DME)\_III [B3LYP/6-31G(d)]

|   |            |            |             |  |  |  |  |
|---|------------|------------|-------------|--|--|--|--|
| C | 0.83250100 | 0.51232500 | -1.34543000 |  |  |  |  |
|---|------------|------------|-------------|--|--|--|--|

|    |             |             |             |                                                |             |             |             |
|----|-------------|-------------|-------------|------------------------------------------------|-------------|-------------|-------------|
| C  | 1.56752200  | 1.46305900  | -2.10627900 | H                                              | 5.49529300  | 0.30314800  | 1.15476600  |
| C  | 2.79202900  | 1.90574600  | -1.67488500 | C                                              | 4.14131700  | 2.53508400  | 0.53014600  |
| C  | 3.36317800  | 1.41728300  | -0.46977600 | H                                              | 4.40638800  | 2.51727700  | 1.59583300  |
| C  | 2.65752400  | 0.42839500  | 0.29083600  | H                                              | 4.92271600  | 3.06375000  | -0.02998100 |
| C  | -0.53327000 | 0.13905800  | -1.78595600 | H                                              | 3.18470100  | 3.03908400  | 0.38824400  |
| O  | -1.51357800 | 0.01182500  | -1.04794500 | O                                              | -0.83067900 | -0.86700400 | -0.67522200 |
| Cl | -2.96279900 | -1.49383000 | 1.79679000  | S                                              | -1.06073200 | -2.52541000 | -0.35554500 |
| H  | 1.13270600  | 1.84437200  | -3.02330100 | O                                              | -0.34522200 | -2.84478300 | 0.87875800  |
| H  | 3.33948100  | 2.64444800  | -2.25373500 | O                                              | -2.48711300 | -2.81313500 | -0.46481000 |
| C  | -0.94263300 | 2.04173500  | 1.86966400  | C                                              | -0.17176300 | -3.12456200 | -1.78542600 |
| H  | 0.03023500  | 1.65210900  | 2.21274900  | H                                              | -0.14531500 | -4.21240600 | -1.68755200 |
| C  | 1.39134900  | -0.00817900 | -0.18628900 | H                                              | -0.72653700 | -2.83094700 | -2.67751600 |
| C  | 3.23339000  | -0.06802700 | 1.49008000  | H                                              | 0.83691700  | -2.69841600 | -1.78497700 |
| C  | 4.45324900  | 0.40065700  | 1.92023800  | C                                              | 1.72933100  | 3.18239100  | -2.42273400 |
| H  | 4.88349100  | 0.02017700  | 2.84203500  | H                                              | 1.13382600  | 4.06708100  | -2.70544800 |
| C  | 5.15474100  | 1.37610900  | 1.17109300  | H                                              | 2.70775000  | 3.56387300  | -2.09320300 |
| H  | 6.11816900  | 1.73333400  | 1.52393100  | H                                              | 1.91671600  | 2.62319900  | -3.34958600 |
| C  | 4.62203800  | 1.87146900  | 0.00288300  | H                                              | 0.82142800  | 2.92543600  | -0.47483300 |
| H  | 5.15675500  | 2.62071600  | -0.57508700 |                                                |             |             |             |
| H  | 2.69533100  | -0.81340800 | 2.06223800  |                                                |             |             |             |
| O  | -0.62957900 | 0.00987300  | -3.10269900 | Structure 11 ·EtMgCl (DME) IX [B3LYP/6-31G(d)] |             |             |             |
| C  | -1.92230900 | -0.35536000 | -3.62948800 | C                                              | 0.83603200  | -0.65672800 | 1.29409200  |
| H  | -1.77986600 | -0.42298200 | -4.70731200 | C                                              | 1.55666000  | -1.63954600 | 2.02749000  |
| H  | -2.22773000 | -1.31885900 | -3.21663400 | C                                              | 2.81045300  | -2.02789800 | 1.63036700  |
| H  | -2.66274700 | 0.40945700  | -3.38334000 | C                                              | 3.42636100  | -1.45232600 | 0.48756000  |
| H  | -1.45775600 | 2.31340200  | 2.80810600  | C                                              | 2.73255900  | -0.43460900 | -0.24513600 |
| Mg | -2.03298500 | 0.46655100  | 0.92940600  | C                                              | -0.55619900 | -0.34341100 | 1.69369500  |
| O  | -3.88854300 | 1.33824100  | 0.25614400  | O                                              | -1.50688700 | -0.18095300 | 0.92723900  |
| C  | -4.85297300 | 0.50922100  | -0.40266700 | Cl                                             | -0.75983900 | -1.73189000 | -2.18954700 |
| H  | -4.30134300 | -0.13876300 | -1.08408100 | H                                              | 1.08811800  | -2.08814200 | 2.89612600  |
| H  | -5.39091700 | -0.10707400 | 0.32536100  | H                                              | 3.34751000  | -2.78981500 | 2.18864200  |
| H  | -5.55504700 | 1.13730900  | -0.96601200 | C                                              | -3.20295700 | 1.51806800  | -1.57452600 |
| C  | -4.49401700 | 2.26579000  | 1.16432300  | C                                              | 1.43747600  | -0.05467100 | 0.19875200  |
| H  | -5.16431700 | 2.93904800  | 0.61551400  | C                                              | 3.34914000  | 0.14250400  | -1.38626900 |
| H  | -5.05917100 | 1.73195200  | 1.93848000  | C                                              | 4.59945100  | -0.27085700 | -1.78375600 |
| H  | -3.68472700 | 2.83574000  | 1.62111700  | H                                              | 5.05991800  | 0.17046000  | -2.66283600 |
| O  | 0.71037600  | -0.97858300 | 0.54402700  | C                                              | 5.29162500  | -1.27074200 | -1.05867100 |
| S  | 0.88448100  | -2.57679400 | -0.03470600 | H                                              | 6.27959900  | -1.58360700 | -1.38481900 |
| O  | 2.30473200  | -2.91035900 | -0.01088000 | C                                              | 4.71746700  | -1.84776100 | 0.05086300  |
| C  | 0.01387800  | -3.37138800 | 1.30838700  | H                                              | 5.24336200  | -2.61821100 | 0.60876900  |
| H  | -0.04234600 | -4.42980800 | 1.04309400  | O                                              | 2.81515200  | 0.90024200  | -1.94559500 |
| H  | 0.59711400  | -3.23219100 | 2.21953900  | H                                              | -0.71427200 | -0.31149700 | 3.01289700  |
| H  | -0.98319400 | -2.92805500 | 1.40169900  | C                                              | -2.03882500 | -0.01258900 | 3.50014000  |
| C  | -0.68507400 | 3.33269700  | 1.06544200  | H                                              | -1.94643100 | -0.00571200 | 4.58558200  |
| H  | -0.10657300 | 3.13525600  | 0.15163200  | H                                              | -2.35652700 | 0.96394500  | 3.12963500  |
| H  | -1.61985900 | 3.81211900  | 0.73656800  | H                                              | -2.74576900 | -0.78018900 | 3.17591400  |
| H  | -0.12620300 | 4.10231000  | 1.62449200  | Mg                                             | -2.17000600 | -0.28877500 | -1.05312500 |
|    |             |             |             | O                                              | -3.73918100 | -1.68885200 | -0.58839900 |
|    |             |             |             | C                                              | -3.66460000 | -3.10801300 | -0.76985500 |
|    |             |             |             | H                                              | -2.66875700 | -3.32188300 | -1.15766900 |
|    |             |             |             | H                                              | -3.82837700 | -3.61861700 | 0.18834100  |
|    |             |             |             | H                                              | -4.42429100 | -3.43290100 | -1.49186000 |
|    |             |             |             | C                                              | -5.02499800 | -1.24811900 | -0.15446600 |
|    |             |             |             | H                                              | -5.79277300 | -1.53661000 | -0.88368700 |
|    |             |             |             | H                                              | -5.26975800 | -1.68637200 | 0.82241400  |
|    |             |             |             | H                                              | -4.98508600 | -0.16153700 | -0.07795800 |
|    |             |             |             | O                                              | 0.77089200  | 0.94944500  | -0.50191400 |
|    |             |             |             | S                                              | 0.87829100  | 2.50905000  | 0.14819000  |
|    |             |             |             | O                                              | 0.04311300  | 2.56158400  | 1.34689100  |
|    |             |             |             | O                                              | 2.28390900  | 2.89189200  | 0.21936600  |
|    |             |             |             | C                                              | 0.06758300  | 3.32539700  | -1.22346700 |
|    |             |             |             | H                                              | -0.01877600 | 4.37829100  | -0.94618200 |
|    |             |             |             | H                                              | 0.69274700  | 3.20776300  | -2.10931000 |
|    |             |             |             | H                                              | -0.91571600 | 2.87664700  | -1.36862900 |
|    |             |             |             | H                                              | -2.63884100 | 2.09078800  | -2.33136600 |
|    |             |             |             | C                                              | -3.63264100 | 2.48150600  | -0.44738300 |
|    |             |             |             | H                                              | -2.77709700 | 2.83925800  | 0.14296400  |
|    |             |             |             | H                                              | -4.17010700 | 3.37721900  | -0.80234300 |
|    |             |             |             | H                                              | -4.30236200 | 1.99249000  | 0.27655300  |
|    |             |             |             | H                                              | -4.10916300 | 1.21493500  | -2.12916300 |
|    |             |             |             |                                                |             |             |             |
|    |             |             |             | Structure 11 ·EtMgCl (DME) v [B3LYP/6-31G(d)]  |             |             |             |
|    |             |             |             | C                                              | 0.74153400  | 1.31298200  | -0.68878600 |
|    |             |             |             | C                                              | 1.46824000  | 2.53388000  | -0.72053700 |
|    |             |             |             | C                                              | 2.74252000  | 2.60846800  | -0.21840100 |
|    |             |             |             | C                                              | 3.36973600  | 1.46847600  | 0.34852800  |
|    |             |             |             | C                                              | 2.66560600  | 0.22059700  | 0.36998700  |
|    |             |             |             | C                                              | -0.66764000 | 1.30131600  | -1.15884500 |
|    |             |             |             | O                                              | -1.58667600 | 0.67663500  | -0.62851200 |
|    |             |             |             | Cl                                             | -0.70011400 | 0.75138000  | 2.75122700  |
|    |             |             |             | H                                              | 0.98630400  | 3.41118300  | -1.13615800 |
|    |             |             |             | H                                              | 3.28289800  | 3.55072900  | -0.23857800 |

  

|                                                |             |             |             |
|------------------------------------------------|-------------|-------------|-------------|
| Structure 11 ·EtMgCl (DME) IV [B3LYP/6-31G(d)] |             |             |             |
| C                                              | -0.86073900 | 0.30758700  | 1.42924900  |
| C                                              | -1.53522500 | 1.16951200  | 2.33692000  |
| C                                              | -2.73181500 | 1.74624100  | 1.99431300  |
| C                                              | -3.33667300 | 1.48302000  | 0.73653200  |
| C                                              | -2.69435100 | 0.58341900  | -0.17581600 |
| C                                              | 0.47877800  | -0.21670700 | 1.79473900  |
| O                                              | 1.46068700  | -0.25176000 | 1.05078400  |
| Cl                                             | 2.90869600  | -1.33312600 | -1.93799800 |
| H                                              | -1.07705800 | 1.37561700  | 3.29789100  |
| H                                              | -3.23211900 | 2.41696600  | 2.68746400  |
| C                                              | 1.05868300  | 2.29624900  | -1.35227400 |
| H                                              | 0.06827400  | 1.99572600  | -1.73314800 |
| C                                              | -1.45280100 | 0.00753000  | 0.21087000  |
| C                                              | -3.30465100 | 0.30943400  | -1.42825000 |
| C                                              | -4.49753600 | 0.90674200  | -1.76453000 |
| H                                              | -4.95472100 | 0.69555900  | -2.72681100 |
| C                                              | -5.13630900 | 1.79535900  | -0.86613000 |
| H                                              | -6.07908900 | 2.25660500  | -1.14666300 |
| C                                              | -4.56906300 | 2.07546100  | 0.35603500  |
| H                                              | -5.05600500 | 2.75672200  | 1.04900400  |
| H                                              | -2.81386800 | -0.37008700 | -2.11375000 |
| O                                              | 0.54886600  | -0.60202900 | 3.06257700  |
| C                                              | 1.80775700  | -1.15415900 | 3.50317400  |
| H                                              | 1.64969100  | -1.42050900 | 4.54753900  |
| H                                              | 2.04808000  | -2.03657300 | 2.90713500  |
| H                                              | 2.60409300  | -0.41239700 | 3.40699800  |
| Mg                                             | 2.11911000  | 0.53456700  | -0.78179300 |
| O                                              | 3.99060700  | 1.20526400  | 0.03305000  |
| C                                              | 5.19393300  | 0.43330400  | 0.10697000  |
| H                                              | 4.97621400  | -0.52975300 | -0.35430600 |
| H                                              | 5.99676600  | 0.93807900  | -0.44473200 |

|                                                |             |             |             |                                                  |             |             |             |
|------------------------------------------------|-------------|-------------|-------------|--------------------------------------------------|-------------|-------------|-------------|
| C                                              | -4.44983800 | 1.18290400  | 1.26777300  | C                                                | -2.72429200 | -2.90774100 | -1.05613400 |
| H                                              | -4.56598500 | 1.74575500  | 2.20921500  | H                                                | -2.85946500 | -3.98350300 | -0.92261300 |
| C                                              | 1.35685100  | 0.17779300  | -0.18594500 | H                                                | -3.38627100 | -2.35377100 | -0.38919600 |
| C                                              | 3.28505700  | -0.91305800 | 0.96240700  | H                                                | -2.88246900 | -2.62773400 | -2.09793600 |
| C                                              | 4.55292900  | -0.81948200 | 1.48956100  | C                                                | 1.59345100  | 3.01957200  | -2.53299700 |
| H                                              | 5.01095100  | -1.68852000 | 1.95322400  | H                                                | 0.88550100  | 3.77302300  | -2.91957000 |
| C                                              | 5.26047300  | 0.40631600  | 1.44890700  | H                                                | 2.40099700  | 3.58259000  | -2.04069200 |
| H                                              | 6.26065500  | 0.46384600  | 1.86877000  | H                                                | 2.04775700  | 2.53921600  | -3.41017300 |
| C                                              | 4.67893600  | 1.52364000  | 0.89513900  | H                                                | 0.44032200  | 2.52189000  | -0.77126700 |
| H                                              | 5.21102200  | 2.47112000  | 0.87509000  |                                                  |             |             |             |
| H                                              | 2.72991800  | -1.84183400 | 1.02709000  |                                                  |             |             |             |
| O                                              | -0.85788800 | 2.08773900  | -2.20994100 | Structure 11 ·EtMgCl (DME) VII [B3LYP/6-31G(d)]  |             |             |             |
| C                                              | -2.20197200 | 2.15176400  | -2.74034400 | C                                                | -1.34527600 | -1.38614700 | -0.17041700 |
| H                                              | -2.14559200 | 2.86387300  | -3.56277400 | C                                                | -2.18489300 | -2.53277900 | -0.24566800 |
| H                                              | -2.49671100 | 1.16427800  | -3.10157700 | C                                                | -3.52810500 | -2.44750300 | 0.01429900  |
| H                                              | -2.90119400 | 2.48889300  | -1.97330400 | C                                                | -4.12414800 | -1.20757600 | 0.36541600  |
| H                                              | -5.18046600 | 0.35975900  | 1.35984500  | C                                                | -3.30649400 | -0.03279900 | 0.42740300  |
| Mg                                             | -2.46534700 | 0.38722100  | 1.29000900  | C                                                | 0.11696000  | -1.53840800 | -0.39512700 |
| O                                              | -2.60083100 | -1.71784500 | 1.26332300  | O                                                | 0.95831400  | -0.76511700 | 0.05677000  |
| C                                              | -1.72992600 | -2.61509800 | 1.96502800  | Cl                                               | 3.79869100  | 0.26051500  | -1.79165300 |
| H                                              | -1.06879400 | -1.99366400 | 2.56957600  | H                                                | -1.73312400 | -3.48177000 | -0.58005400 |
| H                                              | -2.32453500 | -3.27625200 | 2.60849700  | H                                                | -4.15298000 | -3.33442100 | -0.04286400 |
| H                                              | -1.15162200 | -3.20744800 | 1.24872200  | C                                                | 2.86628700  | 1.77633200  | 1.96202100  |
| C                                              | -3.52655000 | -2.38552600 | 0.40175900  | H                                                | 3.83046500  | 1.53598800  | 2.44715200  |
| H                                              | -2.98712400 | -2.91753800 | -0.38921700 | C                                                | -1.91740300 | -0.15675900 | 0.13659300  |
| H                                              | -4.13786900 | -3.08928500 | 0.98093100  | C                                                | -3.90263700 | 1.20631200  | 0.78720000  |
| H                                              | -4.17096300 | -1.61679000 | -0.02829000 | C                                                | -5.24961500 | 1.27988600  | 1.06129400  |
| O                                              | 0.71142400  | -1.06041900 | -0.18263100 | H                                                | -5.69312200 | 2.23075300  | 1.34237600  |
| S                                              | 0.46942000  | -1.87815900 | -1.62204500 | C                                                | -6.06206400 | 0.12282000  | 0.98859600  |
| O                                              | -0.46867600 | -2.93275500 | -1.26553300 | H                                                | -7.12368400 | 0.19681500  | 1.20636000  |
| O                                              | 0.18548000  | -0.92274600 | -2.68798900 | C                                                | -5.50976700 | -1.09183700 | 0.65114600  |
| C                                              | 2.08960800  | -2.60014000 | -1.92358700 | H                                                | -6.12747300 | -1.98465100 | 0.60034600  |
| H                                              | 2.02161000  | -3.13135900 | -2.87560300 | H                                                | -3.27704800 | 2.08761700  | 0.86816000  |
| H                                              | 2.82763600  | -1.79912400 | -1.98482200 | O                                                | 0.42214500  | -2.61620700 | -1.10021400 |
| H                                              | 2.32206100  | -3.29072100 | -1.11264600 | C                                                | 1.83205800  | -2.84757400 | -1.37520100 |
| C                                              | -4.89742400 | 2.09342500  | 0.10878600  | H                                                | -1.85018300 | -3.76335600 | -1.96454600 |
| H                                              | -4.23721000 | 2.96766200  | 0.00025800  | H                                                | 2.24985700  | -2.00286000 | -1.92699300 |
| H                                              | -4.88216600 | 1.56580600  | -0.85694300 | H                                                | 2.37660700  | -2.96510700 | -0.43681300 |
| H                                              | -5.91895700 | 2.49564800  | 0.22213600  | H                                                | 2.10990600  | 1.49425800  | 2.71803000  |
|                                                |             |             |             | Mg                                               | 2.64998200  | 0.53753100  | 0.22939400  |
|                                                |             |             |             | O                                                | 3.60829700  | -1.30817700 | 1.21449600  |
| Structure 11 ·EtMgCl (DME) VI [B3LYP/6-31G(d)] |             |             |             | C                                                | 5.03244800  | -1.39532600 | 1.09669600  |
| C                                              | -0.80063200 | 0.10246400  | 1.39324800  | H                                                | 5.27257100  | -1.15772700 | 0.06016600  |
| C                                              | -1.38512000 | 0.90690600  | 2.40883600  | H                                                | 5.51914900  | -0.67574300 | 1.76798100  |
| C                                              | -2.55936200 | 1.58052900  | 2.18390800  | H                                                | 5.36765600  | -2.41128300 | 1.34637200  |
| C                                              | -3.21999000 | 1.49348700  | 0.92996600  | C                                                | 3.16015900  | -1.57706000 | 2.54193800  |
| C                                              | -2.66316900 | 0.66493700  | -0.09820300 | H                                                | 3.46624000  | -2.58729700 | 2.84738400  |
| C                                              | 0.52419500  | -0.52466300 | 1.63969500  | H                                                | 3.56071700  | -0.83985800 | 3.24781500  |
| O                                              | 1.44911800  | -0.55973900 | 0.83030000  | H                                                | 2.07074400  | -1.51175200 | 2.53368200  |
| Cl                                             | 3.63735800  | -1.12814400 | -1.83120300 | O                                                | -1.17378600 | 1.01487300  | 0.22050000  |
| H                                              | -0.87713500 | 0.98599900  | 3.36356400  | S                                                | -0.41416600 | 1.64152900  | -1.14801800 |
| H                                              | -2.99265800 | 2.19906000  | 2.96502500  | O                                                | 0.94881200  | 1.96303400  | -0.73332800 |
| C                                              | 0.94969400  | 1.98192800  | -1.59046500 | O                                                | -0.69404400 | 0.77132000  | -2.28135700 |
| H                                              | 0.12575400  | 1.49256300  | -2.13670200 | C                                                | -1.31503600 | 3.18608700  | -1.30332400 |
| C                                              | -1.46100100 | -0.04540900 | 0.18264600  | H                                                | -0.86368300 | 3.72661800  | -2.13848800 |
| C                                              | -3.30939200 | 0.59895200  | -1.36207900 | H                                                | -2.36248800 | 2.95986700  | -1.50692100 |
| C                                              | -4.46740800 | 1.30726900  | -1.59007300 | H                                                | -1.19385200 | 3.74623100  | -0.37507000 |
| H                                              | -4.94564500 | 1.26180400  | -2.56425300 | C                                                | 2.80290100  | 3.30314700  | 1.76796300  |
| C                                              | -5.03311300 | 2.10894800  | -0.56918200 | H                                                | 3.58374900  | 3.65604100  | 1.07984900  |
| H                                              | -5.94836300 | 2.66053100  | -0.76436600 | H                                                | 1.84447000  | 3.61518900  | 1.32969300  |
| C                                              | -4.42057500 | 2.20184900  | 0.65973500  | H                                                | 2.92410600  | 3.88014300  | 2.70173700  |
| H                                              | -4.84379900 | 2.82667800  | 1.44197500  |                                                  |             |             |             |
| H                                              | -2.85604600 | 0.01252900  | -2.15290700 | Structure 11 ·EtMgCl (DME) VIII [B3LYP/6-31G(d)] |             |             |             |
| O                                              | 0.64626200  | -1.00330600 | 2.87153700  | C                                                | 0.94623900  | -1.21963100 | 0.82545300  |
| C                                              | 1.89974000  | -1.65150600 | 3.18558500  | C                                                | 1.71787600  | -2.40637300 | 0.96008900  |
| H                                              | 1.78910300  | -1.99741900 | 4.21254300  | C                                                | 2.96433700  | -2.50677300 | 0.39734900  |
| H                                              | 2.05965400  | -2.48889500 | 2.50401700  | C                                                | 3.51793300  | -1.42936700 | -0.34226200 |
| H                                              | 2.72604500  | -0.94256000 | 3.09860500  | C                                                | 2.76949600  | -0.21452600 | -0.47397200 |
| Mg                                             | 2.24695200  | 0.44102300  | -0.87179000 | C                                                | -0.43683200 | -1.19470400 | 1.36341400  |
| O                                              | 3.71860100  | 1.47468900  | 0.33904400  | O                                                | -1.37385500 | -0.56679400 | 0.87183800  |
| C                                              | 5.05860900  | 1.01664600  | 0.55140400  | Cl                                               | -1.13055700 | -1.26967500 | -2.50918300 |
| H                                              | 5.12567900  | 0.02917700  | 0.09489600  | H                                                | 1.28989300  | -3.23913700 | 1.50519700  |
| H                                              | 5.76957500  | 1.69737400  | 0.06639800  | H                                                | 3.53754700  | -3.42388500 | 0.50027300  |
| H                                              | 5.27414900  | 0.96965900  | 1.62744900  | C                                                | -4.45785400 | -1.24186600 | -0.12462900 |
| C                                              | 3.50369000  | 2.81157000  | 0.78714100  | C                                                | 1.49291100  | -0.13736400 | 0.15066300  |
| H                                              | 3.66109700  | 2.88153600  | 1.87223000  | C                                                | 3.31352300  | 0.85289000  | -1.23907000 |
| H                                              | 4.18839800  | 3.50085700  | 0.27681700  | C                                                | 4.55098500  | 0.72956900  | -1.82874000 |
| H                                              | 2.47416100  | 3.06992500  | 0.53737400  | H                                                | 4.95036500  | 1.54625400  | -2.42330600 |
| O                                              | -0.96405100 | -0.87057100 | -0.81840900 | C                                                | 5.30239100  | -0.46141600 | -1.68130500 |
| S                                              | -1.01459500 | -2.54982200 | -0.62108600 | H                                                | 6.27772300  | -0.54341000 | -2.15243700 |
| O                                              | -0.13223700 | -3.05088600 | -1.65475900 | C                                                | 4.79408800  | -1.51608400 | -0.95826100 |
| O                                              | -0.82435400 | -2.85539300 | 0.79477600  | H                                                | 5.35967900  | -2.43832800 | -0.85452900 |

|    |             |             |             |
|----|-------------|-------------|-------------|
| H  | 2.72354900  | 1.75081800  | -1.38187200 |
| O  | -0.58952400 | -1.97254500 | 2.42891400  |
| C  | -1.92279900 | -2.04533300 | 2.98755300  |
| H  | -1.84852600 | -2.76964200 | 3.79775100  |
| H  | -2.21245800 | -1.06383800 | 3.36857100  |
| H  | -2.63799600 | -2.37118700 | 2.22979900  |
| Mg | -2.61355500 | -0.62306700 | -0.85043300 |
| O  | -2.82545300 | 1.43957600  | -1.19879100 |
| C  | -2.01555800 | 2.20927200  | -2.09763100 |
| H  | -1.41194800 | 1.49405900  | -2.65716200 |
| H  | -2.66163300 | 2.77683100  | -2.77938900 |
| H  | -1.37518000 | 2.89222400  | -1.52967100 |
| C  | -3.67554800 | 2.24003400  | -0.37193900 |
| H  | -3.07135300 | 2.88042200  | 0.27983200  |
| H  | -4.33596800 | 2.85358900  | -0.99758700 |
| O  | -4.27554600 | 1.55073300  | 0.22444900  |
| H  | 0.80868800  | 1.07091100  | 0.02479400  |
| S  | 0.59737000  | 2.05906100  | 1.36147300  |
| O  | -0.47325600 | 2.96082200  | 0.96238300  |
| O  | 0.51548700  | 1.24435200  | 2.56871300  |
| C  | 2.15129300  | 2.96632300  | 1.39112800  |
| H  | 2.10837400  | 3.63135600  | 2.25666000  |
| H  | 2.97351900  | 2.25683800  | 1.49466900  |
| H  | 2.23782200  | 3.54117700  | 0.46865400  |
| H  | -4.29736300 | -2.48243000 | 0.12635700  |
| C  | -5.68612100 | -1.32927700 | -1.05253300 |
| H  | -5.50688100 | -1.84025800 | -2.00824300 |
| H  | -6.60244100 | -1.77310000 | -0.62664700 |
| H  | -5.93542500 | -0.28715300 | -1.30215600 |
| H  | -4.71640500 | -0.95123900 | 0.84388900  |

Structure 11·EtMgCl (DME) X [B3LYP/6-31G(d)]

|    |             |             |             |
|----|-------------|-------------|-------------|
| C  | 0.94647300  | -1.05422200 | 1.06475500  |
| C  | 1.74907400  | -2.19423200 | 1.34621600  |
| C  | 2.93436900  | -2.39331700 | 0.68589000  |
| C  | 3.39580300  | -1.46466200 | -0.28449500 |
| C  | 2.61999900  | -0.29081100 | -0.55755700 |
| C  | -0.37687500 | -0.93031500 | 1.71725600  |
| O  | -1.41792100 | -0.56216800 | 1.16685100  |
| Cl | -1.10631500 | -0.87641300 | -2.39965100 |
| H  | 1.39775700  | -2.91024200 | 2.08062300  |
| H  | 3.53498000  | -3.27381100 | 0.89702900  |
| C  | -3.38570500 | 1.88090200  | -0.38667100 |
| C  | 1.40095600  | -0.11473900 | 0.15046300  |
| C  | 3.08220800  | 0.63877600  | -1.52583200 |
| C  | 4.26327400  | 0.41476200  | -2.19440300 |
| H  | 4.60514200  | 1.12682400  | -2.93978900 |
| C  | 5.03712300  | -0.73926600 | -1.92222800 |
| H  | 5.96896600  | -0.89910100 | -2.45743600 |
| C  | 4.61241100  | -1.65731800 | -0.98920600 |
| H  | 5.20148000  | -2.54646300 | -0.77989500 |
| H  | 2.48433700  | 1.51571700  | -1.73907300 |
| O  | -0.36811500 | -1.33015000 | 2.98297500  |
| C  | -1.61624000 | -1.23690200 | 3.70327000  |
| H  | -1.38996300 | -1.59301900 | 4.70748300  |
| H  | -1.95154600 | -0.19826200 | 3.72382700  |
| H  | -2.37795500 | -1.86166800 | 3.23107900  |
| Mg | -2.27020600 | 0.06559200  | -0.62576600 |
| O  | -3.79769700 | -1.47653400 | -0.57144900 |
| C  | -3.37984700 | -2.84309400 | -0.47765900 |
| H  | -2.67013800 | -2.90090800 | 0.34870500  |
| H  | -4.24686500 | -3.48092300 | -0.26386800 |
| H  | -2.88950500 | -3.15976300 | -1.40446400 |
| C  | -4.77642300 | -1.28634400 | -1.60306400 |
| H  | -4.35684500 | -1.55540700 | -2.57947700 |
| H  | -5.66163800 | -1.89838700 | -1.39032000 |
| H  | -5.04776600 | -0.22995900 | -1.59128800 |
| O  | 0.65974700  | 1.04157300  | -0.08797600 |
| S  | 0.89471000  | 2.30787300  | 1.01734800  |
| O  | 0.26394100  | 1.92647000  | 2.27969300  |
| O  | 2.29980100  | 2.69731400  | 0.98888300  |
| C  | -0.11301800 | 3.49776900  | 0.13895400  |
| H  | -0.12608000 | 4.40061800  | 0.75368600  |
| H  | 0.35231600  | 3.69403500  | -0.82757900 |
| H  | -1.11693500 | 3.08703400  | 0.02295800  |
| H  | -4.39523800 | 1.55181600  | -0.07799500 |
| H  | -3.05434900 | 2.47579900  | 0.48259300  |
| C  | -3.54395300 | 2.81821000  | -1.60180200 |
| H  | -2.58005900 | 3.22869600  | -1.93596500 |
| H  | -3.95577800 | 2.28856900  | -2.47209300 |
| H  | -4.20567900 | 3.68153400  | -1.41819700 |

Structure 11·EtMgCl (DME) XI [B3LYP/6-31G(d)]

|    |             |             |             |
|----|-------------|-------------|-------------|
| C  | -0.92693400 | 0.92792300  | 1.04209600  |
| C  | -1.60665900 | 2.12003400  | 1.41452400  |
| C  | -2.81125700 | 2.44495900  | 0.84577400  |
| C  | -3.42025500 | 1.59434300  | -0.11421200 |
| C  | -2.77113000 | 0.36910000  | -0.47699600 |
| C  | 0.41284000  | 0.65609800  | 1.61341000  |
| O  | 1.37823600  | 0.18873400  | 1.00585100  |
| Cl | 1.22507900  | 1.90623900  | -1.98990400 |
| H  | -1.14289800 | 2.77794900  | 2.14033800  |
| H  | -3.31360100 | 3.36748900  | 1.12330500  |
| C  | 2.75405000  | -1.86386400 | -1.56234700 |
| C  | -1.52243100 | 0.06836300  | 0.13609000  |
| C  | -3.38504700 | -0.48735200 | -1.42906300 |
| C  | -4.58802700 | -0.14158400 | -1.99962300 |
| H  | -5.04770000 | -0.80053000 | -2.73090100 |
| C  | -5.23387800 | 1.06686600  | -1.64261600 |
| H  | -6.18445800 | 1.32353700  | -2.10177400 |
| C  | -4.66284100 | 1.91403900  | -0.72075300 |
| H  | -5.15366500 | 2.84346100  | -0.44407000 |
| O  | -2.89052200 | -1.41114100 | -1.70192800 |
| H  | 0.50502600  | 1.02071100  | 2.88828400  |
| C  | 1.77664000  | 0.80792900  | 3.53299500  |
| H  | 1.64857600  | 1.18721300  | 4.54620900  |
| H  | 2.00919500  | -0.25897400 | 3.54488700  |
| H  | 2.56516500  | 1.35376400  | 3.00961900  |
| Mg | 2.20114900  | 0.10173400  | -0.92051700 |
| O  | 4.04148200  | 1.01156500  | -0.28359800 |
| C  | 5.07843800  | 0.22740900  | 0.30390900  |
| H  | 4.69405900  | -0.78805900 | 0.40847200  |
| H  | 5.96418800  | 0.21750000  | -0.34332600 |
| H  | 5.35088300  | 0.63092600  | 1.28831500  |
| C  | 4.43493100  | 2.36460900  | -0.54279800 |
| H  | 4.69874600  | 2.86610500  | 0.39769400  |
| H  | 5.29810400  | 2.38050600  | -1.22002300 |
| H  | 3.58156100  | 2.85372400  | -1.01271100 |
| O  | -0.89149700 | -1.12356900 | -0.22640200 |
| S  | -1.10581000 | -2.42717900 | 0.83198100  |
| O  | -0.45583700 | -2.10120900 | 2.10010800  |
| O  | -2.51086900 | -2.81830300 | 0.81076600  |
| C  | -0.11653600 | -3.59163600 | -0.10050000 |
| H  | -0.10856800 | -4.51563400 | 0.48210600  |
| H  | -0.59339900 | -3.75116900 | -1.06824800 |
| H  | 0.89015300  | -3.19128800 | -0.22316300 |
| C  | 2.98853700  | -2.53938700 | -0.71811600 |
| H  | 3.92832000  | -1.92024200 | -2.56288500 |
| H  | 4.85677700  | -1.51328800 | -2.13625200 |
| H  | 4.17019700  | -2.93881400 | -2.91041100 |
| H  | 3.71629000  | -1.32603500 | -3.46211200 |
| H  | 1.88154300  | -2.32571600 | -2.05472700 |

Structure 11-TSOMe-I [B3LYP/6-31G(d)]

|    |             |             |             |
|----|-------------|-------------|-------------|
| C  | -0.05227400 | 1.38050900  | -0.07446200 |
| C  | 0.89969900  | 2.44616900  | 0.03379800  |
| C  | 2.23951600  | 2.21339600  | 0.02008000  |
| C  | 2.74725800  | 0.87378500  | 0.02638000  |
| C  | 1.84571400  | -0.22338900 | -0.09666800 |
| C  | -1.45717000 | 1.65750000  | 0.01354600  |
| O  | -2.35442000 | 0.78626000  | 0.20367300  |
| O  | -0.34420400 | -0.93751600 | -0.91823200 |
| Cl | -3.21811900 | -2.92344100 | -0.01799300 |
| H  | 0.51486300  | 3.45864900  | 0.07980900  |
| H  | 2.94269600  | 3.03716700  | 0.17050800  |
| Mg | -1.92529000 | -1.11985700 | 0.34586700  |
| C  | -0.18310700 | -0.98383800 | 1.84154800  |
| H  | 0.64013200  | -1.69472000 | 1.76887700  |
| H  | -1.04560800 | -1.58250100 | 2.22735700  |
| C  | 0.40998400  | 0.02397000  | -0.08548600 |
| C  | 2.36473400  | -1.53111300 | -0.21836700 |
| C  | 3.72843600  | -1.76179800 | -0.21058600 |
| H  | 4.10873800  | -2.77505300 | -0.30261200 |
| C  | 4.62120100  | -0.68151700 | -0.07773100 |
| H  | 5.69275600  | -0.86187000 | -0.06926300 |
| C  | 4.13678800  | 0.60722100  | 0.03849400  |
| H  | 4.82402300  | 1.44451700  | 0.13301000  |
| H  | 1.67551500  | -2.36446600 | -0.31279700 |
| O  | -1.80762100 | 2.94311300  | -0.07352800 |
| C  | -3.21020400 | 3.24771400  | 0.02352400  |
| H  | -3.27465900 | 4.32737900  | -0.11101900 |
| H  | -3.76816200 | 2.72754600  | -0.75820200 |

|   |             |             |             |
|---|-------------|-------------|-------------|
| H | -3.60040500 | 2.96012800  | 1.00315400  |
| C | 0.08798600  | 0.14994800  | 2.81252600  |
| H | 0.12133700  | -0.19731000 | 3.85489300  |
| H | 1.04698100  | 0.63170400  | 2.59696300  |
| H | -0.68526300 | 0.92781500  | 2.75850100  |
| S | -0.46252200 | -0.67148900 | -2.63153700 |
| O | -1.70966100 | 0.05142300  | -2.85500100 |
| O | 0.81264700  | -0.16950400 | -3.11752400 |
| C | -0.68299600 | -2.40293800 | -3.06237700 |
| H | -0.88126700 | -2.42746200 | -4.13665000 |
| H | 0.23833200  | -2.93547900 | -2.82464200 |
| H | -1.53352300 | -2.79864200 | -2.50169500 |

Structure 11-TSOMe-II [B3LYP/6-31G(d)]

|    |             |             |             |
|----|-------------|-------------|-------------|
| C  | -0.09745600 | 1.64495500  | -0.07155900 |
| C  | -1.09113300 | 2.67631800  | -0.11285400 |
| C  | -2.41622000 | 2.39760800  | -0.24897000 |
| C  | -2.87532800 | 1.03736800  | -0.29010600 |
| C  | -1.93345300 | -0.03249900 | -0.24420100 |
| C  | 1.28678000  | 1.97597300  | -0.05512300 |
| O  | 2.23175300  | 1.15643100  | -0.29189900 |
| O  | 0.32248400  | -0.77239700 | 0.33440300  |
| Cl | 3.36329300  | -2.21966000 | -1.27242200 |
| H  | -0.74996200 | 3.70338900  | -0.04733200 |
| H  | -3.14972600 | 3.19764500  | -0.28346300 |
| Mg | 1.81189500  | -0.62104700 | -1.04627100 |
| C  | 0.02887900  | -0.18595700 | -2.38046500 |
| C  | -0.50803200 | 0.27843700  | -0.26814500 |
| C  | -2.40060900 | -1.36389900 | -0.20438200 |
| C  | -3.75831500 | -1.64126100 | -0.22623500 |
| H  | -4.09950500 | -2.67137300 | -0.18640200 |
| C  | -4.68803100 | -0.59029800 | -0.29650000 |
| H  | -5.75250400 | -0.80815700 | -0.31711400 |
| C  | -4.25165300 | 0.72269400  | -0.32499300 |
| H  | -4.96991900 | 1.53812500  | -0.35832700 |
| H  | -1.68755400 | -2.17664000 | -0.13326700 |
| O  | 1.58959600  | 3.25549000  | 0.20316600  |
| C  | 2.97657200  | 3.62598900  | 0.15459800  |
| H  | 2.99383800  | 4.69032100  | 0.38948100  |
| H  | 3.55376600  | 3.06329300  | 0.89249000  |
| H  | 3.39225700  | 3.44741300  | -0.84047600 |
| S  | 0.27951400  | -1.08398100 | 2.04915200  |
| O  | -0.24505800 | 0.09507600  | 2.71955800  |
| O  | -0.32880900 | -2.39692400 | 2.19872900  |
| C  | 2.05607100  | -1.21475200 | 2.30173300  |
| H  | 2.19322900  | -1.48724200 | 3.35103900  |
| H  | 2.45517900  | -1.99407700 | 1.64793500  |
| H  | 2.50853400  | -0.24579600 | 2.08719100  |
| H  | -0.77232300 | 0.52045300  | -2.58681000 |
| C  | -0.27529500 | -1.56827500 | -2.95406800 |
| H  | 0.54091700  | -2.28979000 | -2.81267900 |
| H  | -1.17103400 | -1.98922800 | -2.48564000 |
| H  | -0.47158400 | -1.52170400 | -4.03603200 |
| H  | 0.91904600  | 0.27804600  | -2.86464500 |

Structure 11-TSOMe-III [B3LYP/6-31G(d)]

|    |             |             |             |
|----|-------------|-------------|-------------|
| C  | -0.11241400 | 1.50458300  | 0.34127700  |
| C  | -1.10842100 | 2.48719500  | 0.66265700  |
| C  | -2.43311700 | 2.26251600  | 0.46020000  |
| C  | -2.88699700 | 1.00305500  | -0.06025100 |
| C  | -1.94510200 | -0.01359200 | -0.38740600 |
| C  | 1.27245900  | 1.80297200  | 0.49506600  |
| O  | 2.22344200  | 1.07365500  | 0.06889700  |
| O  | 0.27216800  | -0.94282200 | 0.08039300  |
| Cl | 3.42662200  | -1.99824700 | -1.61756300 |
| H  | -0.76579900 | 3.43124700  | 1.07108200  |
| H  | -3.16919000 | 3.02011100  | 0.71230600  |
| Mg | 1.87189200  | -0.48220300 | -1.08109500 |
| C  | 0.16398800  | 0.29259400  | -2.37887800 |
| C  | -0.51377600 | 0.26419600  | -0.26689000 |
| C  | -2.40891200 | -1.26133200 | -0.85554800 |
| C  | -3.76383400 | -1.50651200 | -1.00300600 |
| H  | -4.10238600 | -2.47447400 | -1.36035600 |
| C  | -4.69662000 | -0.50248400 | -0.68943100 |
| H  | -5.75990400 | -0.69374900 | -0.80674100 |
| C  | -4.26269700 | 0.72685100  | -0.22725300 |
| H  | -4.98155100 | 1.50246600  | 0.02513000  |
| H  | -1.69116000 | -2.03877400 | -1.09411400 |
| O  | 1.56920800  | 2.95183200  | 1.11678100  |
| C  | 2.95887800  | 3.29601600  | 1.23590700  |
| H  | 2.97060600  | 4.24453400  | 1.77293400  |

|   |             |             |             |
|---|-------------|-------------|-------------|
| H | 3.50040100  | 2.53182300  | 1.79899300  |
| H | 3.41650500  | 3.40959800  | 0.24982900  |
| S | 0.06937700  | -1.72608000 | 1.61950000  |
| O | -0.50492500 | -0.76924000 | 2.55226000  |
| O | -0.55821500 | -3.00770100 | 1.33786400  |
| C | 1.81452600  | -1.98117200 | 1.97865200  |
| H | 1.85269800  | -2.53581200 | 2.91945500  |
| H | 2.26665000  | -2.56415900 | 1.17259000  |
| H | 2.29441900  | -1.00706900 | 2.08347300  |
| H | -0.87744500 | 0.11524300  | -2.62825500 |
| C | 0.63092800  | 1.67963900  | -2.79840000 |
| H | 0.31423300  | 2.43438500  | -2.06544300 |
| H | 1.72260300  | 1.75693700  | -2.89138700 |
| H | 0.20694700  | 1.97971900  | -3.76627200 |
| H | 0.71030700  | -0.51106700 | -2.92326500 |

Structure 11-TSOMe-IV [B3LYP/6-31G(d)]

|    |             |             |             |
|----|-------------|-------------|-------------|
| C  | -0.17214800 | 1.49283100  | 0.27813200  |
| C  | -1.20917100 | 2.41512400  | 0.63497700  |
| C  | -2.52775900 | 2.09458500  | 0.52836100  |
| C  | -2.92416800 | 0.79621300  | 0.06643100  |
| C  | -1.93364300 | -0.16660200 | -0.28569100 |
| C  | 1.19745900  | 1.92080100  | 0.26211100  |
| O  | 2.14491500  | 1.28990700  | -0.28923100 |
| O  | 0.35487400  | -0.92919000 | 0.11110500  |
| Cl | 3.30320300  | -2.08931200 | -1.63616800 |
| H  | -0.90830800 | 3.39540100  | 0.98685100  |
| H  | -3.29643500 | 2.80917900  | 0.80707700  |
| Mg | 1.85912200  | -0.43768200 | -1.16772100 |
| C  | 0.01557300  | 0.10503300  | -2.43058600 |
| C  | -0.52595600 | 0.20419000  | -0.23968000 |
| C  | -2.34009800 | -1.46032400 | -0.68024700 |
| C  | -3.67930800 | -1.80072400 | -0.74028400 |
| H  | -3.97270800 | -2.79990000 | -1.04908200 |
| C  | -4.66042300 | -0.84813200 | -0.40576200 |
| H  | -5.71292600 | -1.11389300 | -0.45503300 |
| C  | -4.28653500 | 0.42210600  | -0.01124600 |
| H  | -5.04145700 | 1.15675900  | 0.25764400  |
| H  | -1.58339900 | -2.19222500 | -0.94501200 |
| O  | 1.45054300  | 3.09645100  | 0.84274300  |
| C  | 2.81400000  | 3.55507300  | 0.82626700  |
| H  | 2.80243100  | 4.49501200  | 1.37790600  |
| H  | 3.46661600  | 2.82858000  | 1.31541000  |
| H  | 3.15372100  | 3.71775200  | -0.19978700 |
| S  | 0.57589100  | -1.35013700 | 1.78213700  |
| O  | 1.79729500  | -0.68168200 | 2.21726200  |
| O  | -0.68618300 | -1.17497800 | 2.48261100  |
| C  | 0.91378300  | -3.08984100 | 1.47988000  |
| H  | 1.20079100  | -3.51867300 | 2.44301800  |
| H  | 0.00253700  | -3.55487300 | 1.10249100  |
| H  | 1.73339600  | -3.16679000 | 0.76109900  |
| O  | 0.89862800  | -0.18531600 | -3.05236000 |
| C  | -0.43451700 | 1.49030000  | -2.85494800 |
| H  | -1.41485700 | 1.73114700  | -2.43193800 |
| H  | 0.26436700  | 2.26752500  | -2.51790000 |
| H  | -0.51535000 | 1.58308400  | -3.94723200 |
| H  | -0.72928000 | -0.66795400 | -2.62204400 |

Structure 11-TSOMe-V [B3LYP/6-31G(d)]

|    |             |             |             |
|----|-------------|-------------|-------------|
| C  | 0.11312900  | 1.49915300  | -0.36164400 |
| C  | 1.13054800  | 2.43713000  | -0.73595000 |
| C  | 2.45372400  | 2.16629900  | -0.57813700 |
| C  | 2.87834900  | 0.90161400  | -0.04909600 |
| C  | 1.91080600  | -0.07717300 | 0.32429600  |
| C  | -1.26321500 | 1.86143800  | -0.43825200 |
| O  | -2.21963100 | 1.18534200  | 0.05655800  |
| O  | -0.35512800 | -0.92653800 | -0.06681500 |
| Cl | -3.47093400 | -1.88755600 | 1.70171200  |
| H  | 0.80861800  | 3.38788500  | -1.14555600 |
| H  | 3.20751900  | 2.89159600  | -0.86959900 |
| Mg | -1.88353900 | -0.40342500 | 1.16365300  |
| C  | -0.06466400 | 0.27455700  | 2.38682400  |
| H  | 0.69181000  | -0.46875200 | 2.63803900  |
| H  | -0.95530300 | -0.00430900 | 3.00587600  |
| C  | 0.49029800  | 0.24786900  | 0.23996800  |
| C  | 2.34782600  | -1.34105400 | 0.77951000  |
| C  | 3.69656300  | -1.63308700 | 0.88227300  |
| H  | 4.01300000  | -2.61157600 | 1.23096400  |
| C  | 4.65338800  | -0.66294800 | 0.53313600  |
| H  | 5.71252700  | -0.89143700 | 0.61642300  |
| C  | 4.24870700  | 0.57723400  | 0.07541400  |

|   |             |             |             |
|---|-------------|-------------|-------------|
| H | 4.98578800  | 1.32403400  | -0.20905400 |
| H | 1.61234700  | -2.09479500 | 1.03851800  |
| O | -1.54197600 | 3.01729900  | -1.05484000 |
| C | -2.91799700 | 3.42889300  | -1.09165100 |
| H | -2.91669200 | 4.37262800  | -1.63711700 |
| H | -3.53018700 | 2.68790400  | -1.61169600 |
| H | -3.30726800 | 3.57250800  | -0.08044800 |
| C | 0.33545800  | 1.69253200  | 2.74869600  |
| H | 0.37358100  | 1.84484300  | 3.83614500  |
| H | 1.32373200  | 1.93482800  | 2.34640500  |
| H | -0.36947800 | 2.43101700  | 2.34386300  |
| S | -0.23580400 | -1.73246500 | -1.60431100 |
| O | 0.34572300  | -0.80815000 | -2.56510100 |
| O | 0.35045800  | -3.03488000 | -1.32875700 |
| C | -1.99990200 | -1.92221000 | -1.90450600 |
| H | -2.08936700 | -2.49629500 | -2.83007200 |
| H | -2.45125100 | -2.46568400 | -1.07078700 |
| H | -2.44185200 | -0.93147700 | -2.01952800 |

Structure 11-TSCO-I [B3LYP/6-31G(d)]

|    |             |             |             |
|----|-------------|-------------|-------------|
| C  | 0.02373400  | 1.24670100  | -0.31791400 |
| C  | 0.91307500  | 2.34572700  | -0.17823800 |
| C  | 2.26805300  | 2.16005500  | -0.06109700 |
| C  | 2.82587800  | 0.85889800  | -0.01499300 |
| C  | 1.95456900  | -0.27475500 | -0.12495800 |
| C  | -1.45930900 | 1.50183900  | -0.40777000 |
| O  | -2.20904400 | 0.84161900  | -1.21170600 |
| O  | -0.29459700 | -1.15002900 | -0.42582500 |
| Cl | -3.48827300 | -2.60836700 | 0.52320700  |
| H  | 0.49237900  | 3.34291800  | -0.17510300 |
| H  | 2.92938000  | 3.01843900  | 0.02192300  |
| Mg | -2.40580900 | -0.69064800 | -0.00243600 |
| C  | -2.05452300 | 0.71227000  | 1.73277700  |
| H  | -2.30400900 | -0.27582500 | 2.17721800  |
| H  | -2.98453900 | 1.29682900  | 1.78707700  |
| C  | 0.56936500  | -0.03110500 | -0.33713900 |
| C  | 2.51463100  | -1.57319600 | 0.01219200  |
| C  | 3.86539400  | -1.74345600 | 0.20853400  |
| H  | 4.27130400  | -2.74466700 | 0.32186600  |
| C  | 4.73158600  | -0.62552600 | 0.27140900  |
| H  | 5.79737000  | -0.77630900 | 0.41633500  |
| C  | 4.21818600  | 0.64573400  | 0.16769600  |
| H  | 4.86971900  | 1.51303000  | 0.23667900  |
| H  | 1.86227300  | -2.43647300 | -0.00047600 |
| O  | -1.74332000 | 2.79515000  | -0.14268000 |
| C  | -3.06870700 | 3.23407000  | -0.47137700 |
| H  | -3.09354800 | 4.29154100  | -0.20609200 |
| H  | -3.26782000 | 3.09608900  | -1.53609000 |
| H  | -3.81219200 | 2.68329300  | 0.11203600  |
| C  | -0.98051200 | 1.34301000  | 2.61269300  |
| H  | -0.74074000 | 2.35942600  | 2.27966600  |
| H  | -1.29049700 | 1.41618900  | 3.66566400  |
| H  | -0.04842800 | 0.76389000  | 2.59499000  |
| S  | -0.42547900 | -2.01221100 | -1.94752500 |
| O  | -1.79479300 | -1.75032600 | -2.37699000 |
| O  | 0.72821300  | -1.68424600 | -2.76495600 |
| C  | -0.36220600 | -3.68715200 | -1.30118600 |
| H  | -0.57447700 | -4.33726100 | -2.15372200 |
| H  | 0.62895900  | -3.88924300 | -0.89775700 |
| H  | -1.15087100 | -3.77418700 | -0.54863100 |

Structure 11-TSCO-II [B3LYP/6-31G(d)]

|    |             |             |             |
|----|-------------|-------------|-------------|
| C  | -0.27295300 | 1.48472600  | 0.36829500  |
| C  | -1.09777000 | 2.63882200  | 0.45030900  |
| C  | -2.44794000 | 2.57101400  | 0.21409200  |
| C  | -3.06227400 | 1.35491800  | -0.17521900 |
| C  | -2.25403700 | 0.17701600  | -0.29923400 |
| C  | 1.20954700  | 1.61772400  | 0.61410100  |
| O  | 1.86809700  | 0.72643100  | 1.25706300  |
| O  | -0.06867200 | -0.87612800 | -0.12314300 |
| Cl | 3.12636900  | -2.17347300 | -1.34062300 |
| H  | -0.63122000 | 3.57890500  | 0.71495300  |
| H  | -3.06164200 | 3.46327400  | 0.30606200  |
| Mg | 2.10101900  | -0.43855000 | -0.31105800 |
| C  | 1.74941800  | 1.33453700  | -1.66406900 |
| H  | 1.37576200  | 0.53864800  | -2.33987800 |
| C  | -0.87551100 | 0.27752500  | 0.03637700  |
| C  | -2.86463300 | -1.01371500 | -0.77545000 |
| C  | -4.20710000 | -1.04948100 | -1.07463800 |
| H  | -4.65164100 | -1.96809400 | -1.44691900 |
| C  | -5.01373400 | 0.10162900  | -0.90911500 |

|   |             |             |             |
|---|-------------|-------------|-------------|
| H | -6.07397900 | 0.05557700  | -1.14010500 |
| C | -4.44815000 | 1.27749400  | -0.47486600 |
| H | -5.05212400 | 2.17446900  | -0.36471900 |
| H | -2.25574600 | -1.89302700 | -0.93921500 |
| O | 1.57353600  | 2.91465000  | 0.71873600  |
| C | 2.83626600  | 3.17297200  | 1.35262400  |
| H | 2.94209000  | 4.25842500  | 1.33992400  |
| H | 2.83477900  | 2.79751400  | 2.37841700  |
| H | 3.65550300  | 2.70886200  | 0.79898900  |
| S | -0.02494900 | -2.08915900 | 1.12909300  |
| O | 1.35583600  | -2.03592100 | 1.60152000  |
| O | -1.16338900 | -1.89948800 | 2.00935200  |
| C | -0.18669400 | -3.55010500 | 0.09594900  |
| H | -0.01974600 | -4.39937400 | 0.76326400  |
| H | -1.18567300 | -3.58859000 | -0.33582500 |
| H | 0.59933100  | -3.50139600 | -0.66243100 |
| C | 3.16267900  | 1.76415000  | -2.08148100 |
| H | 3.50754900  | 2.61824400  | -1.48627500 |
| H | 3.90785000  | 0.96323700  | -1.97008400 |
| H | 3.21007400  | 2.07752500  | -3.13605600 |
| H | 1.05157500  | 2.16227200  | -1.79657800 |

Structure 11-TSCO-III [B3LYP/6-31G(d)]

|    |             |             |             |
|----|-------------|-------------|-------------|
| C  | -0.50494700 | 1.28572500  | 0.30331300  |
| C  | -1.26609600 | 2.45020600  | 0.59801100  |
| C  | -2.63671000 | 2.45011900  | 0.50541300  |
| C  | -3.34648000 | 1.29197700  | 0.09656000  |
| C  | -2.60830700 | 0.10883500  | -0.23507700 |
| C  | 0.98009600  | 1.29649900  | 0.54335200  |
| O  | 1.51737400  | 0.36246400  | 1.24409400  |
| O  | -0.47408100 | -0.95511000 | -0.57518000 |
| Cl | 4.76123600  | -0.85396000 | -0.19492300 |
| H  | -0.73523900 | 3.34146600  | 0.90845000  |
| H  | -3.19629700 | 3.34978500  | 0.74759300  |
| Mg | 2.53267200  | -0.52496500 | -0.22336000 |
| C  | 1.68035000  | 0.87832900  | -1.75491900 |
| H  | 1.91292800  | -0.04226300 | -2.33896300 |
| C  | -1.19419300 | 0.15089700  | -0.09678300 |
| C  | -3.30812300 | -1.04328200 | -0.68800400 |
| C  | -4.68151300 | -1.02500000 | -0.78434900 |
| H  | -5.20715000 | -1.90922200 | -1.13312700 |
| C  | -5.41625300 | 0.13596800  | -0.44122900 |
| H  | -6.49932400 | 0.13059500  | -0.52377800 |
| C  | -4.76176900 | 1.26874000  | -0.01440100 |
| H  | -5.31841700 | 2.16703500  | 0.23986500  |
| H  | -2.75184700 | -1.93187500 | -0.96477200 |
| O  | 1.45323000  | 2.55355100  | 0.61522500  |
| C  | 2.77328300  | 2.71126900  | 1.16635900  |
| H  | 2.97065900  | 3.78259200  | 1.12842400  |
| H  | 2.80389700  | 2.34500200  | 2.19468100  |
| H  | 3.51005400  | 2.17175000  | 0.56437200  |
| S  | -0.00466000 | -2.28933500 | 0.26963400  |
| O  | -0.77301900 | -3.43303000 | -0.18859800 |
| O  | 1.46364000  | -2.31302700 | 0.04292500  |
| C  | -0.34977100 | -1.95592100 | 1.99887300  |
| H  | 0.00763900  | -2.83767300 | 2.53628400  |
| H  | 0.20033600  | -1.05812000 | 2.28455500  |
| H  | -1.42921200 | -1.84582400 | 2.11626000  |
| C  | 2.60564900  | 2.00351600  | -2.21900800 |
| H  | 2.39388400  | 2.93286100  | -1.67639800 |
| H  | 3.66388500  | 1.76023200  | -2.06402700 |
| H  | 2.48237400  | 2.23028600  | -3.28934100 |
| H  | 0.64486800  | 1.09360500  | -2.02661400 |

Structure 11-TSCO-IV [B3LYP/6-31G(d)]

|    |             |             |             |
|----|-------------|-------------|-------------|
| C  | -0.14896600 | 1.41468500  | 0.45020900  |
| C  | -0.90013700 | 2.61064400  | 0.59879500  |
| C  | -2.24729400 | 2.64082800  | 0.33681200  |
| C  | -2.92835000 | 1.49212900  | -0.14038400 |
| C  | -2.19588700 | 0.27235200  | -0.31827200 |
| C  | 1.35054800  | 1.43844400  | 0.63126700  |
| O  | 1.98810200  | 0.40170200  | 1.08189300  |
| O  | -0.08184900 | -0.92207200 | -0.15831100 |
| Cl | 3.13582900  | -2.16089800 | -1.52147200 |
| H  | -0.38104300 | 3.50161900  | 0.92896900  |
| H  | -2.80729800 | 3.56194200  | 0.47601100  |
| Mg | 1.97008700  | -0.43781900 | -0.69067700 |
| C  | 1.75340200  | 1.60305500  | -1.55911000 |
| H  | 1.28366700  | 0.96488700  | -2.34325700 |
| C  | -0.81732200 | 0.26944400  | 0.03733500  |
| C  | -2.86879500 | -0.85857100 | -0.85583500 |

|   |             |             |             |   |             |             |             |
|---|-------------|-------------|-------------|---|-------------|-------------|-------------|
| C | -4.20660500 | -0.78796100 | -1.17396600 | C | 1.17149600  | 0.17189100  | 0.08227600  |
| H | -4.70421200 | -1.65946700 | -1.58954400 | C | 3.21977800  | -1.18487000 | 0.53881700  |
| C | -4.93879700 | 0.40549300  | -0.96968700 | C | 4.59220900  | -1.24777700 | 0.63017900  |
| H | -5.99536100 | 0.43974700  | -1.21974000 | H | 5.07091500  | -2.18909200 | 0.88425800  |
| C | -4.30952900 | 1.52076200  | -0.46695300 | C | 5.38653600  | -0.09744200 | 0.40388900  |
| H | -4.85870900 | 2.44713800  | -0.31874400 | H | 6.46779600  | -0.16723500 | 0.48073500  |
| H | -2.32378400 | -1.77881600 | -1.02792700 | C | 4.79222400  | 1.10528900  | 0.09743500  |
| O | 1.78285900  | 2.66948400  | 1.00452900  | H | 5.39514800  | 1.99467300  | -0.06670100 |
| C | 3.05651200  | 2.73196600  | 1.66279200  | H | 2.61784100  | -2.06718000 | 0.72560600  |
| H | 3.22867200  | 3.79394200  | 1.84350800  | O | -1.34519900 | 2.76889800  | -0.35289100 |
| H | 3.02920200  | 2.18406800  | 2.60775300  | C | -2.66698600 | 3.05694300  | -0.83872400 |
| H | 3.85120000  | 2.32393800  | 1.03431800  | H | -2.79906400 | 4.12840200  | -0.68718400 |
| S | -0.41427400 | -2.25222400 | 0.98456300  | H | -2.75284900 | 2.79994400  | -1.89673200 |
| O | -1.27155000 | -1.69255800 | 2.01667000  | H | -3.41717000 | 2.50129900  | -0.26761500 |
| O | -0.82473400 | -3.36020700 | 0.13649500  | S | -0.14542200 | -2.15245200 | -0.52787100 |
| C | 1.22594700  | -2.56800100 | 1.64419900  | O | 0.56579700  | -3.37493200 | -0.19862900 |
| H | 1.08633300  | -3.36851900 | 2.37561400  | O | -1.61124300 | -2.12271400 | -0.28733300 |
| H | 1.87820600  | -2.90000100 | 0.83201900  | C | 0.20655600  | -1.65962900 | -2.21733600 |
| H | 1.58574000  | -1.65185800 | 2.11328800  | H | -0.19387600 | -2.46486200 | -2.83811300 |
| C | 3.20187100  | 1.94281100  | -1.93095900 | H | -0.30316000 | -0.71321800 | -2.40402100 |
| H | 3.61473800  | 2.67894900  | -1.23292700 | H | 1.28931000  | -1.58712500 | -2.33365100 |
| H | 3.87447600  | 1.07207400  | -1.92166400 | C | -1.85963600 | -0.14675700 | 2.81777600  |
| H | 3.27970300  | 2.37704900  | -2.93837600 | H | -2.76191100 | -0.76250000 | 2.67018100  |
| H | 1.13451200  | 2.49870200  | -1.54681100 | H | -0.99511500 | -0.82046700 | 2.79364300  |
|   |             |             |             | H | -1.93800400 | 0.23691900  | 3.84687600  |
|   |             |             |             | H | -0.83142200 | 1.58530600  | 2.04024800  |
|   |             |             |             | H | -2.57298600 | 1.69416600  | 1.88128800  |

Structure 11-TSCO-VI [B3LYP/6-31G(d)]

|    |             |             |             |
|----|-------------|-------------|-------------|
| C  | 0.33934300  | 1.51163200  | -0.35957300 |
| C  | 1.28192400  | 2.57402400  | -0.42346900 |
| C  | 2.62381900  | 2.35242000  | -0.24315600 |
| C  | 3.11767200  | 1.06074700  | 0.06722800  |
| C  | 2.19131600  | -0.02758100 | 0.18073500  |
| C  | -1.12203000 | 1.80810200  | -0.56482200 |
| O  | -1.88769600 | 1.01078500  | -1.21905300 |
| O  | -0.10373000 | -0.82732000 | 0.07472100  |
| Cl | -3.39100700 | -1.79063800 | 1.39717100  |
| H  | 0.91208400  | 3.56877600  | -0.63509000 |
| H  | 3.32652600  | 3.17765600  | -0.32304600 |
| Mg | -2.24086400 | -0.18180500 | 0.29040300  |
| C  | -1.73933700 | 1.55818900  | 1.67616200  |
| C  | 0.81969400  | 0.23567000  | -0.09039400 |
| C  | 2.68710000  | -1.29696000 | 0.58018100  |
| C  | 4.02918800  | -1.49109100 | 0.81389100  |
| H  | 4.38553900  | -2.46853200 | 1.12640200  |
| C  | 4.94924200  | -0.42726600 | 0.65815600  |
| H  | 6.00689500  | -0.59760200 | 0.83688800  |
| C  | 4.49779100  | 0.82139400  | 0.29962100  |
| H  | 5.19119100  | 1.65230300  | 0.19819500  |
| H  | 1.99320500  | -2.11214600 | 0.73687500  |
| O  | -1.33421500 | 3.14237700  | -0.65617000 |
| C  | -2.65206700 | 3.54503700  | -1.04799500 |
| H  | -2.61572100 | 4.63364700  | -1.10460400 |
| H  | -2.91933700 | 3.11566000  | -2.01539300 |
| H  | -3.38387600 | 3.23507200  | -0.29461900 |
| S  | -0.35156600 | -1.98832500 | -1.18933000 |
| O  | -1.74985000 | -1.76871500 | -1.56049800 |
| O  | 0.73627600  | -1.90309600 | -2.14561500 |
| C  | -0.29296700 | -3.48847600 | -0.20294300 |
| H  | -0.60463000 | -4.29279900 | -0.87399700 |
| H  | 0.72112400  | -3.65585600 | 0.15703200  |
| H  | -1.01504700 | -3.36871500 | 0.60926800  |
| C  | -0.86694400 | 0.92691300  | 2.76677900  |
| H  | -1.09158600 | -0.13606100 | 2.92299700  |
| H  | 0.20046000  | 1.00517000  | 2.52223000  |
| H  | -1.00203300 | 1.42058600  | 3.74156200  |
| H  | -1.59821900 | 2.63880800  | 1.65984500  |
| H  | -2.81276600 | 1.41097600  | 1.91850600  |

Structure 11-TSCO-VII [B3LYP/6-31G(d)]

|    |             |             |             |
|----|-------------|-------------|-------------|
| C  | 0.54197600  | 1.37415100  | -0.19824500 |
| C  | 1.36267900  | 2.52164400  | -0.37832800 |
| C  | 2.73146400  | 2.44139800  | -0.29193700 |
| C  | 3.38010600  | 1.21297700  | -0.00471300 |
| C  | 2.58134600  | 0.04206900  | 0.20875800  |
| C  | -0.94228700 | 1.48566100  | -0.42307500 |
| O  | -1.52995400 | 0.66295200  | -1.21655700 |
| O  | 0.39376300  | -0.93801000 | 0.44685000  |
| Cl | -4.81096400 | -0.54239100 | 0.11980800  |
| H  | 0.87872800  | 3.46580300  | -0.59470600 |
| H  | 3.33711000  | 3.33083900  | -0.44456100 |
| Mg | -2.56883100 | -0.31299700 | 0.18123200  |
| C  | -1.72037700 | 1.00455700  | 1.79211800  |

Structure 11-TSCO-VIII [B3LYP/6-31G(d)]

|    |             |             |             |
|----|-------------|-------------|-------------|
| C  | 0.20144100  | 1.44257600  | -0.48119200 |
| C  | 1.07152700  | 2.55485400  | -0.63399900 |
| C  | 2.42135600  | 2.43625100  | -0.41578300 |
| C  | 2.99056200  | 1.21234800  | 0.02012400  |
| C  | 2.13757400  | 0.07490600  | 0.20568800  |
| C  | -1.28973700 | 1.62548300  | -0.61628500 |
| O  | -2.04662000 | 0.66087300  | -1.05224500 |
| O  | -0.09918300 | -0.88071400 | 0.10971300  |
| Cl | -3.43075900 | -1.75046800 | 1.56022600  |
| H  | 0.64152800  | 3.50160200  | -0.93553900 |
| H  | 3.07230800  | 3.29486800  | -0.55901600 |
| Mg | -2.07954200 | -0.18104600 | 0.70795000  |
| C  | -1.66845400 | 1.85093800  | 1.54295500  |
| C  | 0.75505900  | 0.22615600  | -0.10280700 |
| C  | 2.70179600  | -1.12980400 | 0.70621300  |
| C  | 4.04880000  | -1.20751700 | 0.98175900  |
| H  | 4.46281100  | -2.13391100 | 1.36937700  |
| C  | 4.89788300  | -0.09576900 | 0.76967500  |
| H  | 5.95916900  | -0.17810100 | 0.98626100  |
| C  | 4.37623400  | 1.08827700  | 0.30200500  |
| H  | 5.01624300  | 1.95351300  | 0.14861300  |
| H  | 2.06658100  | -1.98917800 | 0.88391400  |
| O  | -1.59124900 | 2.89368200  | -1.00107300 |
| C  | -2.94994500 | 3.13410400  | -1.38430900 |
| H  | -2.98671600 | 4.18750800  | -1.66533700 |
| H  | -3.23587100 | 2.50187500  | -2.22726300 |
| H  | -3.62859200 | 2.94921400  | -0.54521100 |
| S  | 0.04287600  | -2.22677000 | -1.05382000 |
| O  | 0.92830600  | -1.75907900 | -2.10763400 |
| O  | 0.34827200  | -3.38274000 | -0.22531900 |
| C  | -1.64127900 | -2.34489600 | -1.66521200 |
| H  | -1.61655400 | -3.14697900 | -2.40775600 |
| H  | -2.30279900 | -2.61024200 | -0.83614700 |
| H  | -1.90673500 | -1.38682600 | -2.11311000 |
| C  | -0.90161100 | 1.20732900  | 2.17579500  |
| H  | -1.25964000 | 0.20140600  | 2.99381500  |
| H  | 0.16803800  | 1.12034500  | 2.49227700  |
| H  | -0.99198300 | 1.80558400  | 3.63386300  |
| H  | -1.33671700 | 2.87801600  | 1.41014000  |
| H  | -2.75312700 | 1.90250300  | 1.75770300  |

Structure 11-TSCO-IX [B3LYP/6-31G(d)]

|    |             |             |             |
|----|-------------|-------------|-------------|
| C  | 0.46628200  | 1.29054800  | -0.33245700 |
| C  | 1.27571200  | 2.41880100  | -0.64286100 |
| C  | 2.64621100  | 2.35212800  | -0.58735100 |
| C  | 3.30950800  | 1.15990500  | -0.19801200 |
| C  | 2.52387800  | 0.01334800  | 0.15181800  |
| C  | -1.01865900 | 1.37902300  | -0.52992600 |
| O  | -1.63234200 | 0.47924900  | -1.20616900 |
| O  | 0.34861900  | -0.94840200 | 0.53812000  |
| Cl | -4.84374000 | -0.67689100 | 0.28742600  |
| H  | 0.78074300  | 3.33580600  | -0.93727000 |





|   |             |             |             |
|---|-------------|-------------|-------------|
| H | -0.71678600 | -2.47589600 | 3.70658700  |
| H | -2.58284000 | -0.87587400 | 3.12099800  |
| C | -1.15539100 | 3.75003400  | 0.06429300  |
| H | -0.87657400 | 4.14078400  | 1.05133100  |
| H | -0.50151100 | 4.22153300  | -0.67587800 |
| H | -2.19585500 | 4.01620600  | -0.12813100 |

Structure 13a·EtMgCl\_II [B3LYP/6-31G(d)]

|    |             |             |             |
|----|-------------|-------------|-------------|
| C  | 0.26787200  | 1.37281000  | -0.54774200 |
| C  | 1.36230500  | 2.28213900  | -0.42481800 |
| C  | 2.63595300  | 1.84176900  | -0.17829800 |
| C  | 2.91199200  | 0.45606300  | -0.02822900 |
| C  | 1.83834700  | -0.48392700 | -0.15410000 |
| C  | -1.10416600 | 1.89755000  | -0.75672200 |
| O  | -2.11428800 | 1.22434600  | -0.51126800 |
| O  | -0.47755200 | -0.92843600 | -0.60821600 |
| C  | -0.59870100 | -1.44669400 | -1.96471300 |
| H  | 1.17594700  | 3.34674700  | -0.50951500 |
| H  | 3.45078000  | 2.55379000  | -0.08128700 |
| H  | -1.44904300 | -2.12689400 | -1.93861400 |
| H  | 0.32534500  | -1.96162900 | -2.24019700 |
| H  | -0.79717900 | -0.62304000 | -2.65664100 |
| Mg | -2.29054900 | -0.55869000 | 0.59393200  |
| C  | -1.73960900 | -0.15411800 | 2.61184900  |
| H  | -0.86956500 | -0.77650200 | 2.88201200  |
| C  | 0.53345000  | 0.00621200  | -0.43582500 |
| C  | 2.10164000  | -1.86962800 | 0.02630700  |
| C  | 3.37837500  | -2.30351600 | 0.30160500  |
| H  | 3.56979100  | -3.36236400 | 0.44840900  |
| C  | 4.44469500  | -1.37786500 | 0.40726500  |
| H  | 5.44677400  | -1.73677100 | 0.62406700  |
| C  | 4.21547800  | -0.02907100 | 0.24983500  |
| H  | 5.02989000  | 0.68441300  | 0.34363900  |
| H  | 1.27932600  | -2.57388800 | -0.02910500 |
| Cl | -3.72845600 | -1.97288700 | -0.50202100 |
| C  | -1.43789600 | 1.30643700  | 2.99851500  |
| H  | -2.30527000 | 1.96028700  | 2.82981500  |
| H  | -1.15466500 | 1.43287200  | 4.05702900  |
| H  | -0.60908400 | 1.72776800  | 2.40942800  |
| H  | -2.55021800 | -0.52621500 | 3.25879700  |
| C  | -1.29311800 | 3.31080400  | -1.25882000 |
| H  | -1.06533100 | 4.02650800  | -0.45869500 |
| H  | -0.63531100 | 3.53662500  | -2.10385400 |
| H  | -2.33684300 | 3.44058600  | -1.54890900 |

Structure 13a·EtMgCl\_III [B3LYP/6-31G(d)]

|    |             |             |             |
|----|-------------|-------------|-------------|
| C  | 0.26829000  | 1.37259300  | -0.54804100 |
| C  | 1.36267100  | 2.28204200  | -0.42505700 |
| C  | 2.63627100  | 1.84189900  | -0.17805300 |
| C  | 2.91244100  | 0.45625000  | -0.02752200 |
| C  | 1.83890500  | -0.48385600 | -0.15347900 |
| C  | -1.10360000 | 1.89724600  | -0.75758000 |
| O  | -2.11387200 | 1.22399800  | -0.51265400 |
| O  | -0.47671700 | -0.92889700 | -0.60793400 |
| C  | -0.59824000 | -1.44665400 | -1.96457300 |
| H  | 1.17625500  | 3.34661100  | -0.51014200 |
| H  | 3.45098900  | 2.55404000  | -0.08099200 |
| H  | -1.44774200 | -2.12788400 | -1.93817300 |
| H  | 0.32624700  | -1.96033600 | -2.24093600 |
| H  | -0.79829400 | -0.62299600 | -2.65605500 |
| Mg | -2.29088400 | -0.55842600 | 0.59307100  |
| C  | -1.74045900 | -0.15322200 | 2.61106300  |
| C  | 0.53399700  | 0.00605800  | -0.43564700 |
| C  | 2.10224600  | -1.86949000 | 0.02718500  |
| C  | 3.37895000  | -2.30328000 | 0.30286600  |
| H  | 3.57038200  | -3.36210100 | 0.44979000  |
| C  | 4.44514200  | -1.37750700 | 0.40868100  |
| H  | 5.44720900  | -1.73624600 | 0.62582500  |
| C  | 4.21585800  | -0.02874900 | 0.25096900  |
| H  | 5.03020100  | 0.68480500  | 0.34488200  |
| H  | 1.28000500  | -2.57382400 | -0.02839100 |
| Cl | -3.72763600 | -1.97433200 | -0.50211300 |
| H  | -0.86776300 | -0.77237700 | 2.88015900  |
| C  | -1.44423100 | 1.30824600  | 2.99829300  |
| H  | -2.31440100 | 1.95867400  | 2.83076800  |
| H  | -1.16041500 | 1.43532300  | 4.05657500  |
| H  | -0.61771700 | 1.73327400  | 2.40859900  |
| H  | -2.54916700 | -0.52894300 | 3.25829300  |
| C  | -1.29245300 | 3.31056800  | -1.25954700 |
| H  | -1.06466200 | 4.02629800  | -0.45945500 |
| H  | -0.63459000 | 3.53640100  | -2.10455800 |

|   |             |            |             |
|---|-------------|------------|-------------|
| H | -2.33614200 | 3.44036900 | -1.54975600 |
|---|-------------|------------|-------------|

Structure 13a-TSOMe-I [B3LYP/6-31G(d)]

|    |             |             |             |
|----|-------------|-------------|-------------|
| Cl | -3.97185900 | -1.96537900 | 0.09937300  |
| C  | 0.09415500  | 1.49161700  | -0.30455300 |
| C  | 1.25608700  | 2.32371700  | -0.16062400 |
| C  | 2.50744500  | 1.81055200  | -0.00353800 |
| C  | 2.71836700  | 0.39107600  | 0.00209200  |
| C  | 1.60614800  | -0.48612400 | -0.15953900 |
| C  | -1.21655600 | 2.06836800  | -0.31230800 |
| O  | -2.26573400 | 1.36069600  | -0.18536100 |
| O  | -0.64299200 | -0.75608000 | -1.01019700 |
| C  | -0.52822200 | -0.65176400 | -2.44763200 |
| H  | 1.12210400  | 3.40051300  | -0.25805600 |
| H  | 3.36568400  | 2.46732300  | 0.10584800  |
| H  | -1.25485800 | -1.35712600 | -2.85311800 |
| H  | 0.48335100  | -0.93023600 | -2.75398200 |
| H  | -0.75779500 | 0.36488300  | -2.77850800 |
| Mg | -2.21964600 | -0.57225100 | 0.24082100  |
| C  | -0.60882100 | -0.62435300 | 1.84558300  |
| H  | 0.09021200  | -1.46227800 | 1.83712000  |
| H  | -1.55333400 | -1.03007100 | 2.27702700  |
| C  | 0.26548000  | 0.06561100  | -0.25443800 |
| C  | 1.83023300  | -1.88021200 | -0.22361500 |
| C  | 3.10846800  | -2.39943900 | -0.11796700 |
| H  | 3.26323100  | -3.47346700 | -0.16470000 |
| C  | 4.20625900  | -1.53585100 | 0.05834800  |
| H  | 5.20881300  | -1.94555800 | 0.14654500  |
| C  | 4.01185600  | -0.16803400 | 0.11633000  |
| H  | 4.85928200  | 0.50125300  | 0.24268300  |
| H  | 0.97996800  | -2.54246800 | -0.35010500 |
| C  | -0.13917400 | 0.53966900  | 2.69867600  |
| H  | -0.74340100 | 1.44202800  | 2.52887300  |
| H  | -0.19671700 | 0.31946600  | 3.77487400  |
| H  | 0.89991000  | 0.80240000  | 2.47568200  |
| C  | -1.42533700 | 3.56474500  | -0.41312900 |
| H  | -1.15746200 | 4.05785900  | 0.52960300  |
| H  | -0.81857400 | 4.01452700  | -1.20509600 |
| H  | -2.48157500 | 3.75501200  | -0.61154100 |

Structure 13a-TSOMe-II [B3LYP/6-31G(d)]

|    |             |             |             |
|----|-------------|-------------|-------------|
| Cl | 3.94399600  | -1.80270300 | 0.08949900  |
| C  | -0.11965700 | 1.65670700  | 0.00820300  |
| C  | -1.26611300 | 2.40912700  | -0.41675200 |
| C  | -2.49863300 | 1.84650400  | -0.56055500 |
| C  | -2.71767500 | 0.46855100  | -0.22330200 |
| C  | -1.62095000 | -0.32817400 | 0.21903300  |
| C  | 1.18349300  | 2.24340700  | -0.01235700 |
| O  | 2.24277600  | 1.53737100  | 0.03176100  |
| O  | 0.61924100  | -0.42196800 | 1.11756500  |
| C  | 0.52821600  | -0.02869100 | 2.50638600  |
| H  | -1.13301700 | 3.45832300  | -0.65970500 |
| H  | -3.34228200 | 2.44216200  | -0.89715100 |
| H  | 1.23985700  | -0.66195600 | 3.03784200  |
| H  | -0.48648000 | -0.20852000 | 2.87039700  |
| H  | 0.79332000  | 1.02512000  | 2.62494900  |
| Mg | 2.18414400  | -0.43671500 | -0.17289500 |
| C  | 0.59465300  | -0.70405800 | -1.77098400 |
| C  | -0.28573200 | 0.24287300  | 0.22247600  |
| C  | -1.85691500 | -1.65613900 | 0.63962500  |
| C  | -3.13311000 | -2.19407300 | 0.60783700  |
| H  | -3.29872800 | -3.21645300 | 0.93479300  |
| C  | -4.21107200 | -1.41870200 | 0.14423600  |
| H  | -5.21011000 | -1.84498700 | 0.11202500  |
| C  | -4.00488600 | -0.11185300 | -0.26177900 |
| H  | -4.84034200 | 0.49402900  | -0.60373100 |
| H  | -1.02139700 | -2.25182300 | 0.99061700  |
| H  | 1.47203700  | -0.32921700 | -2.34055000 |
| C  | 0.43388300  | -2.21097200 | -1.94491600 |
| H  | 0.26085400  | -2.48415100 | -2.99807900 |
| H  | 1.31595400  | -2.77321000 | -1.61237700 |
| H  | -0.42898000 | -2.58356600 | -1.38070300 |
| H  | -0.25273200 | -0.15357500 | -2.17635900 |
| C  | 1.38149100  | 3.73761400  | -0.14952800 |
| H  | 1.29814600  | 4.03849300  | -1.20212100 |
| H  | 0.64916400  | 4.31402500  | 0.42243000  |
| H  | 2.38896900  | 3.98589500  | 0.19062500  |

Structure 13a-TSCO-I [B3LYP/6-31G(d)]

|    |             |             |             |
|----|-------------|-------------|-------------|
| Cl | -3.82359000 | -2.00877600 | 0.11735600  |
| C  | 0.19608400  | 1.30308200  | -0.39610200 |

|                       |                  |             |             |                      |                  |             |             |
|-----------------------|------------------|-------------|-------------|----------------------|------------------|-------------|-------------|
| C                     | 1.21702100       | 2.28311000  | -0.23954000 | O                    | -0.59521700      | -0.75536800 | -0.51897300 |
| C                     | 2.53376100       | 1.93166800  | -0.07128000 | C                    | -0.78428400      | -1.08248500 | -1.92650000 |
| C                     | 2.92273100       | 0.56960100  | 0.00477400  | H                    | 1.18350600       | 3.41794600  | 0.12510400  |
| C                     | 1.91676800       | -0.44419800 | -0.11428600 | H                    | 3.45437500       | 2.52323000  | 0.30622200  |
| C                     | -1.24039500      | 1.70493800  | -0.59967600 | H                    | -1.66494400      | -1.72272800 | -1.95758200 |
| O                     | -1.98208300      | 0.99867400  | -1.38655800 | H                    | 0.10469200       | -1.59446200 | -2.30378500 |
| O                     | -0.40059200      | -1.03253900 | -0.46826100 | H                    | -0.96572300      | -0.16624900 | -2.49597100 |
| C                     | -0.46408300      | -1.68092900 | -1.77496400 | Mg                   | -2.35167100      | -0.54720000 | 0.81326600  |
| H                     | 0.95041400       | 3.33305000  | -0.27978300 | C                    | -1.71049100      | -0.55695500 | 2.82331000  |
| H                     | 3.29540700       | 2.70156600  | 0.02039600  | C                    | 0.45140000       | 0.11780800  | -0.26462800 |
| H                     | -1.21741000      | -2.46440600 | -1.67829700 | C                    | 1.98710900       | -1.83804200 | -0.16814500 |
| H                     | 0.50908100       | -2.11224200 | -2.01594600 | C                    | 3.26314300       | -2.33425200 | -0.02894700 |
| H                     | -0.76415500      | -0.94543200 | -2.52441900 | H                    | 3.43134700       | -3.40692700 | -0.04887200 |
| Mg                    | -2.35272000      | -0.31620700 | 0.03456100  | C                    | 4.35945400       | -1.45661900 | 0.15271900  |
| C                     | -1.88491700      | 1.12424500  | 1.66619300  | H                    | 5.36068100       | -1.86422000 | 0.25937600  |
| H                     | -2.97226400      | 1.20880800  | 1.85705700  | C                    | 4.16090400       | -0.09505600 | 0.20813900  |
| H                     | -1.47529300      | 2.11314300  | 1.86570000  | H                    | 4.99889400       | 0.57973400  | 0.36160100  |
| C                     | 0.57819400       | -0.03389600 | -0.36210000 | H                    | 1.14305700       | -2.50911600 | -0.28014500 |
| C                     | 2.29197000       | -1.80769800 | 0.04252900  | Cl                   | -3.89795600      | -1.66333800 | -0.46798100 |
| C                     | 3.60673300       | -2.14899900 | 0.26535200  | H                    | -0.83570100      | 0.08023500  | 3.02554900  |
| H                     | 3.87874200       | -3.19320100 | 0.39089100  | H                    | -2.50211800      | -0.21267900 | 3.50540000  |
| C                     | 4.60809100       | -1.15059100 | 0.34438500  | C                    | -1.31819400      | 3.53991500  | -0.51614100 |
| H                     | 5.64174000       | -1.43744400 | 0.51539000  | H                    | -1.02786500      | 4.14109000  | 0.35505800  |
| C                     | 4.26982800       | 0.17781900  | 0.22387300  | H                    | -0.69904600      | 3.85878300  | -1.36037400 |
| H                     | 5.02961200       | 0.95110200  | 0.30509600  | H                    | -2.37156600      | 3.72972100  | -0.72776800 |
| H                     | 1.52646600       | -2.57514500 | 0.01372600  | H                    | -1.43905900      | -1.56702400 | 3.16447400  |
| C                     | -1.23022300      | 0.09926000  | 2.60655300  |                      |                  |             |             |
| H                     | -1.70467700      | -0.89234900 | 2.56435100  | Structure 13a-TS'OMe | [B3LYP/6-31G(d)] |             |             |
| H                     | -0.16763800      | -0.03948200 | 2.36699800  | Cl                   | 3.96215900       | -1.95784800 | -0.24937200 |
| H                     | -1.27745600      | 0.41400800  | 3.66053700  | C                    | -0.07995400      | 1.53580200  | 0.08505700  |
| C                     | -1.61773800      | 3.16582600  | -0.46794200 | C                    | -1.23123500      | 2.35438000  | -0.16849300 |
| H                     | -1.34869200      | 3.67081300  | -1.40605300 | C                    | -2.47898900      | 1.83229600  | -0.33183400 |
| H                     | -2.70105700      | 3.23968900  | -0.35379400 | C                    | -2.70029300      | 0.42006900  | -0.21124700 |
| H                     | -1.13068900      | 3.68269700  | 0.36030200  | C                    | -1.59825700      | -0.44530500 | 0.04730100  |
|                       |                  |             |             | C                    | 1.23181200       | 2.10489100  | 0.08101200  |
| Structure 13a-TSCO-II | [B3LYP/6-31G(d)] |             |             | O                    | 2.27873500       | 1.38822000  | -0.01272700 |
| Cl                    | -3.54168500      | -2.33841200 | 0.21279300  | O                    | 0.65292200       | -0.66918600 | 0.90908300  |
| C                     | 0.24405300       | 1.19617600  | -0.48716300 | C                    | 0.55388400       | -0.46153500 | 2.33560600  |
| C                     | 1.18862500       | 2.25675800  | -0.38965200 | H                    | -1.09244700      | 3.42707400  | -0.25552100 |
| C                     | 2.51754500       | 2.01698000  | -0.13946900 | H                    | -3.32825200      | 2.47996300  | -0.52941000 |
| C                     | 2.99246100       | 0.69907200  | 0.08306100  | H                    | 1.27041700       | -1.15207000 | 2.78246200  |
| C                     | 2.06280000       | -0.39018600 | 0.02357100  | H                    | -0.45963200      | -0.69768300 | 2.66979600  |
| C                     | -1.20957100      | 1.47974200  | -0.76829200 | H                    | 0.80695500       | 0.57015700  | 2.59414700  |
| O                     | -1.87699100      | 0.65816700  | -1.50315500 | Mg                   | 2.21507200       | -0.55949200 | -0.38414000 |
| O                     | -0.19132800      | -1.17193700 | -0.35698400 | C                    | 0.53636100       | -0.68090300 | -1.88290800 |
| C                     | -0.16059700      | -1.93956500 | -1.59855300 | C                    | -0.25400300      | 0.10695300  | 0.10496400  |
| H                     | 0.85271500       | 3.27670200  | -0.53776600 | C                    | -1.82975700      | -1.82722800 | 0.22708000  |
| H                     | 3.22099000       | 2.84417900  | -0.09341400 | C                    | -3.10956100      | -2.34745000 | 0.15008100  |
| H                     | -0.87155900      | -2.75509200 | -1.45733600 | H                    | -3.27200400      | -3.41232000 | 0.28876300  |
| H                     | 0.84540800       | -2.33054200 | -1.76105000 | C                    | -4.19882300      | -1.49679800 | -0.11849100 |
| H                     | -0.46955800      | -1.29527200 | -2.42444900 | H                    | -5.20263600      | -1.90759700 | -0.18506900 |
| Mg                    | -2.19606200      | -0.55016300 | 0.03345500  | C                    | -3.99538200      | -0.14067400 | -0.29616900 |
| C                     | -1.87390700      | 1.04556100  | 1.54854200  | H                    | -4.83656000      | 0.51843200  | -0.49609100 |
| H                     | -1.52506900      | 0.20226700  | 2.18041600  | H                    | -0.98459700      | -2.48002800 | 0.41906800  |
| C                     | 0.71284900       | -0.10113600 | -0.31337300 | H                    | 1.44854000       | -0.74960300 | -2.51503200 |
| C                     | 2.52004300       | -1.70310400 | 0.32652600  | H                    | -0.11689200      | 0.03624600  | -2.37863100 |
| C                     | 3.84297000       | -1.92819300 | 0.63253600  | C                    | 1.44859500       | 3.60244900  | 0.11504400  |
| H                     | 4.17808400       | -2.93404000 | 0.86928000  | H                    | 1.27327800       | 4.03595900  | -0.87810200 |
| C                     | 4.77097800       | -0.85841300 | 0.65316600  | H                    | 0.78218900       | 4.10622900  | 0.82093400  |
| H                     | 5.81256300       | -1.05442400 | 0.89119900  | H                    | 2.48718000       | 3.79650700  | 0.38979100  |
| C                     | 4.35134800       | 0.42562200  | 0.39113300  | H                    | 0.06725500       | -1.66790100 | -1.87096100 |
| H                     | 5.05372700       | 1.25458500  | 0.42653900  |                      |                  |             |             |
| H                     | 1.80938600       | -2.52195600 | 0.34174000  | Structure 13a-TS'CO  | [B3LYP/6-31G(d)] |             |             |
| H                     | -1.16445200      | 1.84787700  | 1.75387800  | Cl                   | -3.88495700      | -2.01549400 | 0.36747900  |
| C                     | -3.30069700      | 1.45340000  | 1.93698600  | C                    | 0.13031900       | 1.30099000  | -0.24939500 |
| H                     | -3.37187500      | 1.79083800  | 2.98280200  | C                    | 1.15633300       | 2.28081300  | -0.14816400 |
| H                     | -3.66770100      | 2.28038300  | 1.31532500  | C                    | 2.47854100       | 1.92808500  | -0.02748500 |
| H                     | -4.02123000      | 0.63026600  | 1.82979100  | C                    | 2.86548300       | 0.56622700  | 0.05474200  |
| C                     | -1.68240100      | 2.91574000  | -0.75207200 | C                    | 1.85317900       | -0.44628000 | -0.01260200 |
| H                     | -1.35664300      | 3.39566400  | -1.68556600 | C                    | -1.31929600      | 1.70570500  | -0.38965000 |
| H                     | -2.77355800      | 2.92719900  | -0.74165000 | O                    | -2.07811300      | 1.00911200  | -1.16492300 |
| H                     | -1.30227600      | 3.49576500  | 0.09075700  | O                    | -0.47614000      | -1.03345100 | -0.28216500 |
|                       |                  |             |             | C                    | -0.57342800      | -1.69999000 | -1.57814800 |
| Structure 13a-MeMgCl  | [B3LYP/6-31G(d)] |             |             | H                    | 0.88853600       | 3.33062600  | -0.18739600 |
| C                     | 0.22019600       | 1.49063400  | -0.15606500 | H                    | 3.24515200       | 2.69671800  | 0.02435700  |
| C                     | 1.34409000       | 2.34906200  | 0.04061300  | H                    | -1.32369700      | -2.48210300 | -1.45142300 |
| C                     | 2.61564200       | 1.85074400  | 0.14912200  | H                    | 0.39313800       | -2.13405100 | -1.83932600 |
| C                     | 2.85928900       | 0.45282300  | 0.07588800  | H                    | -0.89280500      | -0.97440600 | -2.32949200 |
| C                     | 1.75441700       | -0.43577300 | -0.12918300 | Mg                   | -2.41775300      | -0.32322000 | 0.25405700  |
| C                     | -1.14493600      | 2.06945400  | -0.20992600 | C                    | -1.90084300      | 1.15192600  | 1.81880900  |
| O                     | -2.15874200      | 1.39639900  | 0.01480800  | H                    | -1.78646500      | 0.25514400  | 2.45986300  |

|                                    |             |             |              |   |            |             |             |
|------------------------------------|-------------|-------------|--------------|---|------------|-------------|-------------|
| C                                  | 0.50802500  | -0.03536500 | -0.21822300  | C | 3.87479200 | 0.31111900  | -0.19219800 |
| C                                  | 2.22994900  | -1.80834600 | 0.15301800   | H | 4.20324600 | 0.83727500  | 0.71165100  |
| C                                  | 3.55077000  | -2.15050500 | 0.33403500   | H | 3.93028500 | 1.05040200  | -1.00234100 |
| H                                  | 3.82420800  | -3.19335200 | 0.46736600   | C | 4.82248000 | -0.85665800 | -0.49269900 |
| C                                  | 4.55722500  | -1.15422900 | 0.36014000   | H | 4.76665600 | -1.59159200 | 0.32372100  |
| H                                  | 5.59556700  | -1.44193700 | 0.49809700   | H | 4.48311600 | -1.38272900 | -1.39661900 |
| C                                  | 4.21885100  | 0.17307800  | 0.23064400   | C | 6.27703100 | -0.41216800 | -0.67761800 |
| H                                  | 4.98333400  | 0.94486500  | 0.27186800   | H | 6.93329500 | -1.26506700 | -0.88560100 |
| H                                  | 1.46168900  | -2.57352500 | 0.16470500   | H | 6.37215800 | 0.29335700  | -1.51202900 |
| H                                  | -1.11954400 | 1.83696400  | 2.14664600   | H | 6.65482300 | 0.08886800  | 0.22204600  |
| C                                  | -1.68059200 | 3.16645800  | -0.22085900  |   |            |             |             |
| H                                  | -1.37684300 | 3.70005900  | -1.13225800  |   |            |             |             |
| H                                  | -1.20628700 | 3.64216900  | 0.63908200   |   |            |             |             |
| H                                  | -2.76499300 | 3.25192800  | -0.13345000  |   |            |             |             |
| H                                  | -2.87675800 | 1.60624600  | 2.04107700   |   |            |             |             |
| Structure 13b_I [B3LYP/6-31G(d)]   |             |             |              |   |            |             |             |
| C                                  | 0.11443000  | -0.16011600 | -0.28317300  |   |            |             |             |
| C                                  | -0.13904100 | -1.53668600 | -0.56111000  |   |            |             |             |
| C                                  | -1.40213300 | -2.06866500 | -0.52045900  |   |            |             |             |
| C                                  | -2.51142000 | -1.26416800 | -0.14879600  |   |            |             |             |
| C                                  | -2.28814400 | 0.11384400  | 0.16434600   |   |            |             |             |
| C                                  | 1.52111500  | 0.36058800  | -0.32263500  |   |            |             |             |
| O                                  | 1.77838500  | 1.53667000  | -0.53214200  |   |            |             |             |
| O                                  | -0.81007100 | 1.96840300  | 0.41261100   |   |            |             |             |
| C                                  | -0.85734400 | 2.91309400  | -0.66628200  |   |            |             |             |
| H                                  | 0.69218500  | -2.17799400 | -0.83376300  |   |            |             |             |
| H                                  | -1.56537200 | -3.11613400 | -0.76062600  |   |            |             |             |
| H                                  | -0.77087600 | 3.89749500  | -0.20143600  |   |            |             |             |
| H                                  | -1.81323000 | 2.84318200  | -1.20149200  |   |            |             |             |
| H                                  | -0.01969600 | 2.75493300  | -1.34824900  |   |            |             |             |
| C                                  | -0.96640600 | 0.65426200  | 0.06396900   |   |            |             |             |
| C                                  | -3.38726800 | 0.91507600  | 0.57558500   |   |            |             |             |
| C                                  | -4.65470900 | 0.38165100  | 0.64864900   |   |            |             |             |
| H                                  | -5.48759700 | 1.00328300  | 0.96564200   |   |            |             |             |
| C                                  | -4.88032400 | -0.97662800 | 0.31942000   |   |            |             |             |
| H                                  | -5.88550300 | -1.38512200 | 0.38008100   |   |            |             |             |
| C                                  | -3.83113700 | -1.78074500 | -0.06641100  |   |            |             |             |
| H                                  | -3.99787500 | -2.82759400 | -0.30857000  |   |            |             |             |
| H                                  | -3.20234000 | 1.94872700  | 0.84487700   |   |            |             |             |
| C                                  | 2.65461700  | -0.63860200 | -0.07515900  |   |            |             |             |
| H                                  | 2.39630700  | -1.26731600 | 0.78821600   |   |            |             |             |
| H                                  | 2.70285600  | -1.32700000 | -0.93297000  |   |            |             |             |
| C                                  | 4.01629400  | 0.03108000  | 0.12315900   |   |            |             |             |
| H                                  | 4.23878400  | 0.65811300  | -0.74820000  |   |            |             |             |
| H                                  | 3.95902100  | 0.71874100  | 0.97676800   |   |            |             |             |
| C                                  | 5.14826700  | -0.97983600 | 0.34548000   |   |            |             |             |
| H                                  | 5.19881000  | -1.66658100 | -0.51201200  |   |            |             |             |
| H                                  | 4.91607700  | -1.60412100 | 1.22033800   |   |            |             |             |
| C                                  | 6.51268200  | -0.31168700 | 0.54384500   |   |            |             |             |
| H                                  | 7.30301200  | -1.05420200 | 0.70265900   |   |            |             |             |
| H                                  | 6.78938100  | 0.28935700  | -0.33089300  |   |            |             |             |
| H                                  | 6.50268400  | 0.35688100  | 1.41330100   |   |            |             |             |
| Structure 13b_II [B3LYP/6-31G(d)]  |             |             |              |   |            |             |             |
| C                                  | -0.01355300 | 0.87024200  | 0.19517600   |   |            |             |             |
| C                                  | -0.75199700 | 2.09139100  | 0.18080500   |   |            |             |             |
| C                                  | -2.11288000 | 2.11288400  | 0.03273700   |   |            |             |             |
| C                                  | -2.84261600 | 0.90362200  | -0.13162100  |   |            |             |             |
| C                                  | -2.13223400 | -0.33843700 | -0.11610200  |   |            |             |             |
| C                                  | 1.48256600  | 1.01383700  | 0.32412200   |   |            |             |             |
| O                                  | 1.94144500  | 2.09708800  | 0.66202300   |   |            |             |             |
| O                                  | -0.06822400 | -1.54290000 | 0.12340400   |   |            |             |             |
| C                                  | -0.05730600 | -2.16328000 | 1.41337500   |   |            |             |             |
| H                                  | -0.18393600 | 3.00787400  | 0.29577000   |   |            |             |             |
| H                                  | -2.65090500 | 3.05751200  | 0.02548500   |   |            |             |             |
| H                                  | 0.46040900  | -3.11705900 | 1.29038900   |   |            |             |             |
| H                                  | -1.07620100 | -2.34212500 | 1.77711000   |   |            |             |             |
| H                                  | 0.47941200  | -1.54537400 | 2.14450200   |   |            |             |             |
| C                                  | -0.71496700 | -0.32459400 | 0.07892500   |   |            |             |             |
| C                                  | -2.85110100 | -1.54762700 | -0.31615500  |   |            |             |             |
| C                                  | -4.21603000 | -1.52991100 | -0.50078700  |   |            |             |             |
| H                                  | -4.75381500 | -2.46045100 | -0.66025700  |   |            |             |             |
| C                                  | -4.92316200 | -0.30411600 | -0.49398200  |   |            |             |             |
| H                                  | -6.00027900 | -0.30334800 | -0.63752300  |   |            |             |             |
| C                                  | -4.24937000 | 0.88429000  | -0.31831500  |   |            |             |             |
| H                                  | -4.78677300 | 1.82944300  | -0.32598900  |   |            |             |             |
| H                                  | -2.30232900 | -2.48246300 | -0.34833400  |   |            |             |             |
| C                                  | 2.42135500  | -0.13836700 | -0.01641200  |   |            |             |             |
| H                                  | 2.35591500  | -0.88468600 | 0.78772500   |   |            |             |             |
| H                                  | 2.05110300  | -0.65671100 | -0.90863100  |   |            |             |             |
| Structure 13b_III [B3LYP/6-31G(d)] |             |             |              |   |            |             |             |
| C                                  | 0.39645000  | -0.48732600 | -0.87209500  |   |            |             |             |
| C                                  | -0.12565800 | -1.80933200 | -0.96102300  |   |            |             |             |
| C                                  | -1.41468400 | -2.10110700 | -0.58974500  |   |            |             |             |
| C                                  | -2.25561500 | -1.09262200 | -0.04948400  |   |            |             |             |
| C                                  | -1.74346200 | 0.23757400  | 0.08468200   |   |            |             |             |
| C                                  | 1.80768200  | -0.20351800 | -1.31105100  |   |            |             |             |
| O                                  | 2.08496000  | 0.77154400  | -1.99172100  |   |            |             |             |
| O                                  | 0.06238200  | 1.79538200  | -0.17897200  |   |            |             |             |
| C                                  | -0.15461000 | 2.70547300  | -1.27030400  |   |            |             |             |
| H                                  | 0.50449700  | -2.59753600 | -1.36214600  |   |            |             |             |
| H                                  | -1.80118600 | -3.11175400 | -0.049338200 |   |            |             |             |
| H                                  | 0.23088700  | 3.67011300  | -0.93300500  |   |            |             |             |
| H                                  | -1.22498300 | 2.79756100  | -1.49420600  |   |            |             |             |
| H                                  | 0.39561200  | 2.37095800  | -2.15214800  |   |            |             |             |
| C                                  | -0.41643000 | 0.52190900  | -0.36449800  |   |            |             |             |
| C                                  | -2.56364100 | 1.23778900  | 0.67261300   |   |            |             |             |
| C                                  | -3.84462300 | 0.94177800  | 1.08140600   |   |            |             |             |
| H                                  | -4.46279100 | 1.71412000  | 1.53089300   |   |            |             |             |
| H                                  | -4.36199100 | -0.36741800 | 0.92741400   |   |            |             |             |
| C                                  | -5.37531000 | -0.58701900 | 1.25268900   |   |            |             |             |
| C                                  | -3.58275700 | -1.36114200 | 0.37917300   |   |            |             |             |
| H                                  | -3.97101700 | -2.37111400 | 0.27172100   |   |            |             |             |
| H                                  | -2.15316000 | 2.23226400  | 0.80747600   |   |            |             |             |
| C                                  | 2.89987100  | -1.15373700 | -0.83336500  |   |            |             |             |
| H                                  | 3.82058200  | -0.85962800 | -1.34757200  |   |            |             |             |
| H                                  | 2.66343300  | -2.18343500 | -1.13133100  |   |            |             |             |
| C                                  | 3.09486400  | -1.10594800 | 0.69848200   |   |            |             |             |
| H                                  | 2.17478400  | -1.44351100 | 1.19392000   |   |            |             |             |
| H                                  | 3.87381700  | -1.83299100 | 0.96573700   |   |            |             |             |
| C                                  | 3.48464100  | 0.28098200  | 1.22840900   |   |            |             |             |
| H                                  | 2.69723700  | 1.00478500  | 0.98116800   |   |            |             |             |
| H                                  | 4.38862500  | 0.62493200  | 0.70672000   |   |            |             |             |
| C                                  | 3.72814500  | 0.28615700  | 2.74078700   |   |            |             |             |
| H                                  | 4.53754000  | -0.40140900 | 3.01694300   |   |            |             |             |
| H                                  | 4.00428300  | 1.28536100  | 3.09582800   |   |            |             |             |
| H                                  | 2.82931900  | -0.02417200 | 3.28782900   |   |            |             |             |
| Structure 13b_IV [B3LYP/6-31G(d)]  |             |             |              |   |            |             |             |
| C                                  | 0.14665800  | 1.19153200  | 0.18809900   |   |            |             |             |
| C                                  | -0.66882900 | 2.18434600  | -0.43306700  |   |            |             |             |
| C                                  | -1.96479000 | 1.93312200  | -0.79670600  |   |            |             |             |
| C                                  | -2.54486900 | 0.65462800  | -0.57253700  |   |            |             |             |
| C                                  | -1.75732600 | -0.35921700 | 0.05979100   |   |            |             |             |
| C                                  | 1.55952700  | 1.61513500  | 0.50724800   |   |            |             |             |
| O                                  | 1.81323500  | 2.81126600  | 0.56428200   |   |            |             |             |
| O                                  | 0.29938700  | -1.04625700 | 1.08959500   |   |            |             |             |
| C                                  | 0.11472600  | -1.08688100 | 2.50934200   |   |            |             |             |
| H                                  | -0.21615600 | 3.15503600  | -0.60276500  |   |            |             |             |
| H                                  | -2.56310800 | 2.70685600  | -1.27123800  |   |            |             |             |
| H                                  | 0.69240000  | -1.94102800 | 1.86957300   |   |            |             |             |
| H                                  | -0.94223100 | -1.22229300 | 2.76786700   |   |            |             |             |
| H                                  | 0.48447900  | -0.16760000 | 2.98129100   |   |            |             |             |
| C                                  | -0.41648000 | -0.05163600 | 0.45195700   |   |            |             |             |
| C                                  | -2.32206200 | -1.64744700 | 0.26096800   |   |            |             |             |
| C                                  | -3.61571500 | -1.91478100 | -0.12914300  |   |            |             |             |
| H                                  | -4.03430800 | -2.90578600 | 0.02334000   |   |            |             |             |
| C                                  | -4.40250300 | -0.90768400 | -0.73713800  |   |            |             |             |
| H                                  | -5.42272600 | -1.12995400 | -1.03800100  |   |            |             |             |
| C                                  | -3.87579200 | 0.34582500  | -0.95675600  |   |            |             |             |
| H                                  | -4.47273600 | 1.11914800  | -1.43406000  |   |            |             |             |
| H                                  | -1.70717900 | -2.42360100 | 0.70328600   |   |            |             |             |
| C                                  | 2.68532700  | 0.60168100  | 0.65605000   |   |            |             |             |
| H                                  | 2.45733700  | -0.11868300 | 1.444627100  |   |            |             |             |
| H                                  | 3.56748900  | 1.17717300  | 0.95489800   |   |            |             |             |
| C                                  | 2.97159700  | -0.16714800 | -0.65001000  |   |            |             |             |
| H                                  | 2.08388800  | -0.74121500 | -0.94140800  |   |            |             |             |
| H                                  | 3.16379300  | 0.55259700  | -1.45797400  |   |            |             |             |
| C                                  | 4.16924800  | -1.11678800 | -0.51870700  |   |            |             |             |
| H                                  | 5.05524200  | -0.54494300 | -0.20923200  |   |            |             |             |

|                                          |             |             |             |                                           |             |             |              |
|------------------------------------------|-------------|-------------|-------------|-------------------------------------------|-------------|-------------|--------------|
| H                                        | 3.97081000  | -1.83586000 | 0.28855200  | C                                         | 0.47866700  | 0.87677300  | 3.43797300   |
| C                                        | 4.47508700  | -1.87362100 | -1.81520300 | H                                         | 1.56988100  | 0.97527900  | 3.52613500   |
| H                                        | 5.33170300  | -2.54615400 | -1.69236900 | H                                         | 0.08635300  | 0.82987500  | 4.46782100   |
| H                                        | 3.61745100  | -2.47963100 | -2.13189300 | H                                         | 0.28913700  | -0.11277900 | 2.99480900   |
| H                                        | 4.71005400  | -1.18052600 | -2.63227200 | H                                         | 0.05914300  | 2.96982700  | 3.11266900   |
| Structure 13b·EtMgCl_I [B3LYP/6-31G(d)]  |             |             |             |                                           |             |             |              |
| C                                        | 0.04120700  | -1.14039600 | 0.07257500  | C                                         | 2.37720400  | -1.73498800 | -0.08853800  |
| C                                        | -0.28558600 | -2.46562500 | 0.49210500  | H                                         | 2.33500800  | -2.30742800 | 0.85101700   |
| C                                        | -1.57888600 | -2.91819900 | 0.49623700  | H                                         | 2.10002000  | -2.44908100 | -0.87625200  |
| C                                        | -2.64784700 | -2.07616200 | 0.08809600  | C                                         | 3.79651400  | -1.20177800 | -0.30551100  |
| C                                        | -2.35447800 | -0.74328600 | -0.34600800 | H                                         | 4.05284700  | -0.51273700 | 0.50712500   |
| C                                        | 1.45022500  | -0.66926400 | 0.13467200  | H                                         | 3.82386300  | -0.60504200 | -1.22612200  |
| O                                        | 1.73478500  | 0.53468100  | 0.17878400  | C                                         | 4.83543800  | -2.32788800 | -0.38646200  |
| O                                        | -0.73495100 | 0.96038800  | -0.84103400 | H                                         | 4.56868900  | -3.01637000 | -1.19938900  |
| C                                        | -0.57896400 | 1.04738100  | -2.28664500 | H                                         | 4.80141200  | -2.92233600 | -0.53985500  |
| H                                        | 0.50626500  | -3.12244700 | 0.83310100  | C                                         | 6.25892900  | -1.80576300 | -0.60281800  |
| H                                        | -1.80240600 | -3.92851800 | 0.82754600  | H                                         | 6.98036900  | -2.62880500 | -0.65183400  |
| H                                        | -0.32367000 | 2.08726200  | -2.48645000 | H                                         | 6.33398800  | -1.23884700 | -1.53842300  |
| H                                        | -1.51479900 | 0.75753200  | -2.77151200 | H                                         | 6.56547000  | -1.14008400 | 0.21268700   |
| H                                        | 0.23537200  | 0.39176000  | -2.60887200 | Structure 13b·EtMgCl_III [B3LYP/6-31G(d)] |             |             |              |
| Mg                                       | 0.50050200  | 2.21611500  | 0.48531700  | C                                         | -0.17464700 | -1.12753800 | 0.09946200   |
| C                                        | -0.29673800 | 2.15487300  | 2.45727500  | C                                         | -0.58776600 | -2.39965300 | 0.59937000   |
| C                                        | -0.99790100 | -0.31598400 | -0.36326700 | C                                         | -1.91182400 | -2.74340300 | 0.67855600   |
| C                                        | -3.42249800 | 0.11693200  | -0.72232700 | C                                         | -2.92643800 | -1.83738700 | 0.26890500   |
| C                                        | -4.72232500 | -0.33426500 | -0.68781500 | C                                         | -2.54625100 | -0.55546800 | -0.24449800  |
| H                                        | -5.53337500 | 0.33211200  | -0.96615600 | C                                         | 1.26986100  | -0.77409100 | 0.07470000   |
| C                                        | -5.01275600 | -1.65844800 | -0.27922800 | O                                         | 1.65356700  | 0.40219000  | 0.05088900   |
| H                                        | -6.04395000 | -1.99934500 | -0.25893900 | C                                         | -0.81814200 | 0.98473800  | -0.88747900  |
| C                                        | -3.99889500 | -2.50789900 | 0.10402600  | O                                         | -0.71381600 | 0.98500500  | -2.34079000  |
| H                                        | -4.22027100 | -3.52028100 | 0.43149500  | H                                         | 0.16333100  | -3.10245900 | 0.94125000   |
| H                                        | -3.20055000 | 1.13869200  | -1.00854100 | H                                         | -2.20096700 | -3.71474300 | 1.07015500   |
| Cl                                       | 1.13121700  | 3.82418700  | -1.03114800 | H                                         | -0.37706300 | 1.98631500  | -2.60615000  |
| H                                        | -0.19061200 | 1.14205600  | 2.88285100  | H                                         | -1.69005500 | 0.75494900  | -2.77545000  |
| C                                        | -1.76470100 | 2.60227600  | 2.61148100  | H                                         | 0.02664400  | 0.24407500  | -2.65614800  |
| H                                        | -1.91437100 | 3.63246300  | 2.26003900  | Mg                                        | 0.58065000  | 2.20095600  | 0.31503200   |
| H                                        | -2.45067100 | 1.97095900  | 2.02764600  | C                                         | -0.13536000 | 2.30960700  | 2.31480700   |
| H                                        | -2.12702600 | 2.57227800  | 3.65305200  | C                                         | -1.16191600 | -0.24179800 | -0.33559100  |
| H                                        | 0.32912100  | 2.79013400  | 3.10530000  | C                                         | -3.55717900 | 0.36878000  | -0.62608700  |
| C                                        | 2.57301800  | -1.68999600 | 0.16954000  | C                                         | -4.88615000 | 0.02727400  | -0.51980700  |
| H                                        | 2.51782000  | -2.20862000 | 1.13950500  | H                                         | -5.65248200 | 0.74257100  | -0.80349200  |
| H                                        | 2.37159600  | -2.46331200 | -0.58439800 | C                                         | -5.26390900 | -1.24698300 | -0.03127000  |
| C                                        | 3.97023500  | -1.09059600 | -0.01629800 | H                                         | -6.31719900 | -1.50145800 | 0.04487700   |
| H                                        | 4.14099200  | -0.32654300 | 0.75048200  | C                                         | -4.30576000 | -2.15611700 | 0.35818000   |
| H                                        | 4.01527900  | -0.56576600 | -0.97906500 | H                                         | -4.59307700 | -3.12985100 | 0.74604200   |
| C                                        | 5.07460300  | -2.15331500 | 0.04915000  | H                                         | -3.26667100 | 1.35337300  | -0.97454900  |
| H                                        | 4.89460300  | -2.91887600 | -0.71942900 | Cl                                        | 1.28113500  | 3.66237600  | -1.31458000  |
| H                                        | 5.02291600  | -2.67459700 | 1.01596300  | H                                         | -0.55460200 | 1.33478400  | -2.61896600  |
| C                                        | 6.47565700  | -1.56255300 | -0.13735000 | C                                         | 0.88106000  | 2.75917800  | 3.38462200   |
| H                                        | 7.24469100  | -2.34123800 | -0.08702900 | H                                         | 1.28960700  | 3.75472100  | 3.16444700   |
| H                                        | 6.56862500  | -1.06276000 | -1.10892600 | H                                         | 0.45446200  | 2.81386700  | 4.40051900   |
| H                                        | 6.69881500  | -0.82089200 | 0.63873700  | H                                         | 1.74156900  | 2.07712600  | 3.44644500   |
| Structure 13b·EtMgCl_II [B3LYP/6-31G(d)] |             |             |             |                                           |             |             |              |
| C                                        | -0.12167400 | -1.04727500 | -0.03057000 | H                                         | -0.99634300 | 2.99814100  | 2.34360700   |
| C                                        | -0.50082400 | -2.37661500 | 0.32831700  | C                                         | 2.30551200  | -1.88346700 | 0.09679400   |
| C                                        | -1.81472300 | -2.76313100 | 0.36416700  | H                                         | 2.25912700  | -2.36192100 | 1.08754900   |
| C                                        | -2.85353300 | -1.84743000 | 0.04700800  | C                                         | 2.00160900  | -2.66278500 | -0.161561800 |
| C                                        | -2.50838100 | -0.50804400 | -0.32457200 | H                                         | 3.73487500  | -1.40918900 | -0.61893600  |
| C                                        | 1.31314400  | -0.65553300 | -0.01418100 | H                                         | 4.01431000  | -0.64805700 | 0.55487900   |
| O                                        | 1.66590800  | 0.52829900  | 0.06921700  | H                                         | 3.76750500  | -0.90875100 | -1.15839000  |
| O                                        | -0.82606300 | 1.14513900  | -0.77610000 | C                                         | 4.74752400  | -2.56151100 | -0.15502200  |
| C                                        | -0.70248300 | 1.31942000  | -2.21652300 | H                                         | 4.45779900  | -3.32209100 | -0.89438800  |
| H                                        | 0.26820300  | -3.09114500 | 0.59785600  | H                                         | 4.70912300  | -3.05884900 | 0.82486300   |
| H                                        | -2.07729000 | -3.77791400 | 0.65004900  | C                                         | 6.17961200  | -2.09579400 | -0.43565000  |
| H                                        | -0.43251600 | 2.36512000  | -2.35784300 | H                                         | 6.88239800  | -2.93591500 | -0.41229500  |
| H                                        | -1.65521400 | 1.07745200  | -2.69487600 | H                                         | 6.25586900  | -1.62292000 | -1.42204500  |
| H                                        | 0.09170300  | 0.67186900  | -2.59950100 | H                                         | 6.51006000  | -1.36207200 | 0.30904800   |
| Mg                                       | 0.53334000  | 2.22596800  | 0.58491600  | Structure 13b·EtMgCl_IV [B3LYP/6-31G(d)]  |             |             |              |
| C                                        | -0.13193700 | 2.01465200  | 2.59752700  | C                                         | 0.55949900  | -0.64802000 | 0.53805600   |
| H                                        | -1.23043300 | 1.91306500  | 2.61372300  | C                                         | 0.73994600  | -1.93109600 | 1.13870000   |
| C                                        | -1.13318800 | -0.14692600 | -0.37107700 | C                                         | -0.19433100 | -2.92469000 | 1.00393400   |
| C                                        | -3.54439300 | 0.42203100  | -0.61383600 | C                                         | -1.38574000 | -2.71050400 | 0.26081100   |
| C                                        | -4.86333800 | 0.03325400  | -0.55380100 | C                                         | -1.59520200 | -1.43777200 | -0.36185600  |
| H                                        | -5.64898300 | 0.75206100  | -0.76711000 | C                                         | 1.56550900  | 0.42614600  | 0.75214200   |
| C                                        | -5.20601100 | -1.29522100 | -0.20371300 | O                                         | 1.26866600  | 1.62500500  | 0.65101200   |
| H                                        | -6.25180600 | -1.58590700 | -0.16112000 | O                                         | -0.80018800 | 0.76900800  | -0.87364100  |
| C                                        | -4.22326000 | -2.21276800 | 0.09401200  | C                                         | -0.34120900 | 0.79801300  | -2.25527000  |
| H                                        | -4.48333600 | -3.22966900 | 0.37581900  | H                                         | 1.62620700  | -2.11663200 | 1.73432700   |
| H                                        | -3.28176500 | 1.44549600  | -0.85657700 | H                                         | -0.03733800 | -3.88901400 | 1.47922200   |
| Cl                                       | 1.13408900  | 3.94484600  | -0.81411900 | H                                         | -0.53913600 | 1.81019700  | -2.60555500  |
|                                          |             |             |             | H                                         | -0.89029600 | 0.05237900  | -2.83635000  |
|                                          |             |             |             | H                                         | 0.73268800  | 0.59220700  | -2.29025100  |

|                                          |             |             |             |                                           |             |             |             |
|------------------------------------------|-------------|-------------|-------------|-------------------------------------------|-------------|-------------|-------------|
| Mg                                       | -0.60923600 | 2.54756600  | 0.41618700  | C                                         | 0.39293100  | -1.97623200 | 1.22368700  |
| C                                        | -1.77568100 | 2.25809200  | 2.17264100  | C                                         | -0.66856100 | -2.84226900 | 1.19186300  |
| C                                        | -0.59454100 | -0.43754300 | -0.21970000 | C                                         | -1.84358900 | -2.52933000 | 0.45820100  |
| C                                        | -2.79967200 | -1.20439900 | -1.08109800 | C                                         | -1.90249100 | -1.29351500 | -0.26362500 |
| C                                        | -3.74547200 | -2.19795900 | -1.19160300 | C                                         | 1.51575000  | 0.20502000  | 0.62034100  |
| H                                        | -4.66726000 | -2.00881400 | -1.73369100 | O                                         | 1.38475600  | 1.41873600  | 0.40920300  |
| C                                        | -3.53207000 | -3.46330900 | -0.59268800 | O                                         | -0.83652900 | 0.73615600  | -0.97833700 |
| H                                        | -4.28832500 | -4.23697300 | -0.69019100 | C                                         | -0.43358000 | 0.58741400  | -2.37006300 |
| C                                        | -2.38062000 | -3.71192600 | 0.12040100  | H                                         | 1.26437800  | -2.23197200 | 1.81510000  |
| H                                        | -2.22030700 | -4.67793300 | 0.59189100  | H                                         | -0.62625300 | -3.77727400 | 1.74355900  |
| H                                        | -2.97261100 | -0.22672600 | -1.51632500 | H                                         | -0.48892900 | 1.58928000  | -2.79392500 |
| Cl                                       | -0.38970100 | 4.13997200  | -1.22618600 | H                                         | -1.11207300 | -0.10636200 | -2.87344300 |
| H                                        | -1.38360200 | 1.40809100  | 2.75724700  | H                                         | 0.59435500  | 0.21599400  | -2.41724700 |
| C                                        | -3.28846700 | 2.04981600  | 1.95560300  | Mg                                        | -0.33824700 | 2.59145700  | 0.12333000  |
| H                                        | -3.74363400 | 2.89883100  | 1.42737100  | C                                         | -1.47602800 | 2.67181400  | 1.91823500  |
| H                                        | -3.49760800 | 1.15654000  | 1.34858100  | C                                         | -0.77268000 | -0.43028500 | -0.22918400 |
| H                                        | -3.85517600 | 1.92565600  | 2.89401200  | C                                         | -3.08932600 | -0.95744200 | -0.97135900 |
| H                                        | -1.63670700 | 3.13052400  | 2.83197600  | C                                         | -4.16180900 | -1.81972800 | -0.97759200 |
| C                                        | 3.00126400  | 0.07119400  | 1.07789800  | H                                         | -5.06831800 | -1.55122100 | -1.51191300 |
| H                                        | 3.04285800  | -0.59570600 | 1.94799400  | C                                         | -4.09797400 | -3.05130800 | -0.28138400 |
| H                                        | 3.49711500  | 1.00532800  | 1.35615500  | H                                         | -4.95296100 | -3.72119500 | -0.29718800 |
| C                                        | 3.73412400  | -0.58832100 | -0.11212200 | C                                         | -2.96657600 | -3.39539700 | 0.42388100  |
| H                                        | 3.22609500  | -1.52069600 | -0.39090300 | H                                         | -2.92022100 | -4.33343400 | 0.97078800  |
| H                                        | 3.66988100  | 0.07718100  | -0.98367600 | H                                         | -3.14639700 | -0.00247900 | -1.48123800 |
| C                                        | 5.20806200  | -0.87834700 | 0.20065500  | Cl                                        | 0.06310600  | 3.96638500  | -1.67569500 |
| H                                        | 5.70881200  | 0.05810100  | 0.48080700  | H                                         | -1.56437900 | 1.66475200  | -2.36138100 |
| H                                        | 5.26917000  | -1.53423900 | 1.08062500  | C                                         | -0.96527600 | 3.64068300  | 3.00478400  |
| C                                        | 5.94677300  | -1.52507500 | -0.97523500 | H                                         | -0.91287100 | 4.67405200  | 2.63593700  |
| H                                        | 6.99489800  | -1.72018800 | -0.72378700 | H                                         | -1.59937100 | 3.66290200  | 3.90728000  |
| H                                        | 5.48763000  | -2.48059600 | -1.25645200 | H                                         | 0.04776600  | 3.38009600  | 3.34411900  |
| H                                        | 5.93154400  | -0.87573600 | -1.85869400 | C                                         | -2.51233900 | 2.95078900  | 1.66446400  |
| Structure 13b·EtMgCl_V [B3LYP/6-31G(d)]  |             |             |             |                                           |             |             |             |
| C                                        | 0.31364900  | -0.71097700 | 0.45870500  | H                                         | 2.89726600  | -0.31178100 | 0.96336800  |
| C                                        | 0.25214000  | -1.99814400 | 1.07479000  | H                                         | 2.86696900  | -0.91114600 | 1.88137600  |
| C                                        | -0.86721500 | -2.78384000 | 0.98878500  | C                                         | 3.51502800  | 0.56776100  | 1.16531100  |
| C                                        | -2.01781800 | -2.33968900 | 0.28456900  | H                                         | 3.51883800  | -1.14743700 | -0.17824400 |
| C                                        | -1.98911300 | -1.05654500 | -0.35122800 | H                                         | 2.89038900  | -2.02395900 | -0.38357900 |
| C                                        | 1.52522700  | 0.13715200  | 0.61832900  | C                                         | 3.52799300  | -0.54528800 | -1.04682800 |
| O                                        | 1.48171000  | 1.36761200  | 0.47764500  | H                                         | 4.94762000  | -1.60276400 | 0.19763200  |
| O                                        | -0.78340600 | 0.93628600  | -0.93390900 | H                                         | 5.56810200  | -0.72085900 | 0.35632600  |
| C                                        | -0.38214900 | 0.85327100  | -2.33107000 | C                                         | 4.93638500  | -2.19578600 | 1.07307500  |
| H                                        | 1.10398300  | -2.35404400 | 1.64202000  | H                                         | 5.58129500  | -2.42182500 | -0.98091900 |
| H                                        | -0.89015700 | -3.75547200 | 1.47442700  | H                                         | 6.59923600  | -2.73122500 | -0.72022500 |
| H                                        | -0.37263500 | 1.88150100  | -2.69043900 | H                                         | 5.00053100  | -3.32851500 | -1.19004900 |
| H                                        | -1.10025600 | 0.23817300  | -2.87990600 | H                                         | 5.63729400  | -1.84105900 | -1.90930500 |
| H                                        | 0.62031100  | 0.42082000  | -2.40111500 | Structure 13b·EtMgCl_VII [B3LYP/6-31G(d)] |             |             |             |
| Mg                                       | -0.17061300 | 2.65495600  | 0.31126100  | C                                         | 0.01106900  | -1.06654600 | -0.65994500 |
| C                                        | -1.25687900 | 2.63234300  | 2.14366700  | C                                         | -0.34680500 | -2.43935100 | -0.49215900 |
| H                                        | -2.26195100 | 2.21231000  | 1.96813200  | C                                         | -1.62613200 | -2.81517700 | -0.17696300 |
| C                                        | -0.80173600 | -0.27870800 | -0.26299500 | C                                         | -2.64926900 | -1.84544800 | -0.00239200 |
| C                                        | -3.14866100 | -0.59109700 | -1.03044300 | C                                         | -2.32909400 | -0.46023300 | -0.17697500 |
| C                                        | -4.27918900 | -1.37356300 | -1.09025700 | O                                         | 1.42276300  | -0.69573500 | -0.93507400 |
| H                                        | -5.16406600 | -1.00665700 | -1.60189700 | C                                         | 1.85567300  | 0.44366600  | -0.70390500 |
| C                                        | -4.30304000 | -2.65060800 | -0.47862900 | O                                         | -0.72901800 | 1.23681500  | -0.74312800 |
| H                                        | -5.20322300 | -3.25590600 | -0.53595800 | C                                         | -0.99535500 | 1.69617800  | -2.10001900 |
| C                                        | -3.19892800 | -3.12039700 | 0.19677400  | H                                         | 0.41664400  | -3.20111800 | -0.59610200 |
| H                                        | -3.21870200 | -4.09425600 | 0.67881600  | H                                         | -1.86956600 | -3.86598500 | -0.04660700 |
| H                                        | -3.13770700 | 0.39735800  | -1.47546000 | H                                         | -0.70033600 | 2.74463400  | -2.11289100 |
| Cl                                       | 0.25879000  | 4.15718300  | -1.37231200 | H                                         | -2.05779100 | 1.57011500  | -2.32416300 |
| C                                        | -0.62180200 | 1.90199400  | 3.34260600  | H                                         | -0.38634900 | 1.12606200  | -2.80757100 |
| H                                        | 0.35006300  | 2.33641400  | 3.61620600  | Mg                                        | 0.99474900  | 2.03213900  | 0.37144800  |
| H                                        | -1.24228500 | 1.92831000  | 4.25425300  | C                                         | 0.80541600  | 1.47244800  | 2.41710300  |
| H                                        | -0.43871300 | 0.83807200  | 3.12888400  | C                                         | -0.99643400 | -0.10760800 | -0.52610200 |
| H                                        | -1.44751100 | 3.67837000  | 2.43299800  | C                                         | -3.34096700 | 0.51860200  | 0.02527000  |
| C                                        | 2.86608300  | -0.49613000 | 0.92484000  | C                                         | -4.61783000 | 0.13627500  | 0.36798700  |
| H                                        | 2.78721100  | -1.18342800 | 1.77533600  | H                                         | -5.38219900 | 0.89009700  | 0.53174400  |
| H                                        | 3.53507300  | 0.31758100  | 1.21860400  | C                                         | -4.94109800 | -1.23379900 | 0.52166300  |
| C                                        | 3.44796100  | -1.24727700 | -0.29448900 | H                                         | -5.95410100 | -1.51868900 | 0.79122600  |
| H                                        | 2.76138800  | -2.04775600 | -0.60062800 | C                                         | -3.97767100 | -2.20161700 | 0.34432300  |
| H                                        | 3.51643200  | -0.55057800 | -1.14083000 | H                                         | -4.21986500 | -3.25308000 | 0.47432000  |
| C                                        | 4.83378000  | -1.83977900 | -0.00665100 | H                                         | -3.08517000 | 1.56801500  | -0.06638900 |
| H                                        | 5.51031300  | -1.03640000 | 0.31467400  | Cl                                        | 1.33579300  | 3.96651100  | -0.82095000 |
| H                                        | 4.76062300  | -2.53658100 | 0.84025000  | H                                         | 0.83840900  | 0.37387800  | 2.51990400  |
| C                                        | 5.43260000  | -2.56207600 | -1.21747200 | C                                         | -0.45244700 | 1.99601400  | 3.14022900  |
| H                                        | 6.41829500  | -2.97748500 | -0.98137000 | H                                         | -0.50237600 | 3.09337600  | 3.12405000  |
| H                                        | 4.79168900  | -3.38970600 | -1.54511300 | H                                         | -1.37801400 | 1.63493500  | 2.66790700  |
| H                                        | 5.55385700  | -1.87898000 | -2.06659300 | H                                         | -0.50850100 | 1.69643000  | 4.20055900  |
| Structure 13b·EtMgCl_VI [B3LYP/6-31G(d)] |             |             |             |                                           |             |             |             |
| C                                        | 0.36686400  | -0.73378800 | 0.51973700  | H                                         | 1.69361200  | 1.82607200  | 2.96592300  |
|                                          |             |             |             | C                                         | 2.39409900  | -1.72362600 | -1.47791500 |
|                                          |             |             |             | H                                         | 3.09110500  | -1.17741500 | -2.12226400 |
|                                          |             |             |             | H                                         | 1.87018300  | -2.45962800 | -2.09556600 |

|   |            |             |             |
|---|------------|-------------|-------------|
| C | 3.20539500 | -2.45075700 | -0.37014900 |
| H | 2.52112600 | -2.96276900 | 0.31976800  |
| H | 3.78529800 | -3.23948200 | -0.86746100 |
| C | 4.15605400 | -1.54990800 | 0.42892800  |
| H | 4.83045400 | -1.03153400 | -0.26574300 |
| H | 3.58739700 | -0.76618700 | 0.94257600  |
| C | 4.97614100 | -2.34156900 | 1.45299700  |
| H | 5.58676100 | -3.11241700 | 0.96656200  |
| H | 5.65116200 | -1.68240600 | 2.00894100  |
| H | 4.32640400 | -2.84196200 | 2.18147000  |

Structure 13b·EtMgCl\_VIII [B3LYP/6-31G(d)]

|    |             |             |             |
|----|-------------|-------------|-------------|
| C  | -0.12878600 | -0.91179800 | -0.70905600 |
| C  | -0.49214400 | -2.29178400 | -0.64541200 |
| C  | -1.76288100 | -2.68464000 | -0.31631000 |
| C  | -2.77059400 | -1.72645100 | -0.02556100 |
| C  | -2.44429300 | -0.33331800 | -0.09367500 |
| C  | 1.27445600  | -0.52647300 | -1.01055900 |
| O  | 1.73256500  | 0.57772500  | -0.67928200 |
| O  | -0.84413000 | 1.39510200  | -0.56342300 |
| C  | -1.14149700 | 1.97397800  | -1.86665100 |
| H  | 0.26154100  | -3.04598700 | -0.83964100 |
| H  | -2.01114400 | -3.74110200 | -0.26460500 |
| H  | -0.83235300 | 3.01611700  | -1.79691200 |
| H  | -2.21150900 | 1.88036800  | -2.07004800 |
| H  | -0.56071100 | 1.46035500  | -2.63837200 |
| Mg | 0.92240900  | 2.05994100  | 0.57123500  |
| C  | 0.78644200  | 1.35858900  | 2.57814700  |
| H  | -0.27433700 | 1.35622200  | 2.88238000  |
| C  | -1.12049800 | 0.03886900  | -0.45615600 |
| C  | -3.44049100 | 0.63087600  | 0.22287800  |
| C  | -4.70844100 | 0.22869900  | 0.57579500  |
| H  | -5.46077600 | 0.97063100  | 0.82663800  |
| C  | -5.03806500 | -1.14754400 | 0.62647000  |
| H  | -6.04375800 | -1.44806900 | 0.90623600  |
| C  | -4.08956600 | -2.10265400 | 0.33590000  |
| H  | -4.33626000 | -3.15989800 | 0.38594700  |
| H  | -3.17919000 | 1.68291000  | 0.20859500  |
| Cl | 1.24805800  | 4.09601700  | -0.44109700 |
| C  | 1.39840100  | -0.01064000 | 2.93048900  |
| H  | 2.47802400  | -0.03922500 | 2.72391000  |
| H  | 1.27988900  | -0.28751100 | 3.99172300  |
| H  | 0.94712100  | -0.82903000 | 2.34935200  |
| H  | 1.24927500  | 2.12267100  | 3.22356300  |
| C  | 2.19733700  | -1.49754300 | -1.71738400 |
| H  | 2.84821100  | -0.89377100 | -2.35903400 |
| H  | 1.62217200  | -2.17054300 | -2.36053100 |
| C  | 3.08332800  | -2.32702600 | -0.74761600 |
| C  | 2.44954400  | -2.86096700 | -0.02687500 |
| H  | 3.57992100  | -3.09867100 | -1.35075200 |
| C  | 4.14338500  | -1.51438400 | 0.00652900  |
| H  | 4.76969500  | -0.97913700 | -0.71986300 |
| H  | 3.65998600  | -0.74551200 | 0.61956300  |
| C  | 5.02351600  | -2.39802300 | 0.89689400  |
| H  | 5.54798200  | -3.16219400 | 0.30978800  |
| H  | 5.77929900  | -1.80036800 | 1.41745800  |
| H  | 4.42635200  | -2.91389700 | 1.65861800  |

Structure 13b·EtMgCl\_IX [B3LYP/6-31G(d)]

|    |             |             |             |
|----|-------------|-------------|-------------|
| C  | -0.25730400 | -1.01067400 | -0.67528100 |
| C  | -0.70515400 | -2.35892700 | -0.52572900 |
| C  | -1.98327900 | -2.65172400 | -0.12837000 |
| C  | -2.91416700 | -1.61691800 | 0.15477400  |
| C  | -2.50227900 | -0.25313800 | 0.00525900  |
| C  | 1.15379800  | -0.73484000 | -1.05039100 |
| O  | 1.68778400  | 0.36084600  | -0.82171200 |
| O  | -0.82314900 | 1.34279900  | -0.62413400 |
| C  | -1.16361500 | 1.87199100  | -1.93895700 |
| H  | -0.01105600 | -3.16996200 | -0.71162900 |
| H  | -2.29602700 | -3.68604900 | -0.01530000 |
| H  | -0.80159300 | 2.89917000  | -1.94029300 |
| H  | -2.24628200 | 1.82231800  | -2.08100600 |
| H  | -0.65044600 | 1.29248600  | -2.71178900 |
| Mg | 1.04701400  | 1.98055400  | 0.35618500  |
| C  | 1.01871200  | 1.39302400  | 2.40145500  |
| C  | -1.17562800 | 0.01398600  | -0.43237200 |
| C  | -3.41899500 | 0.78836400  | 0.31776200  |
| C  | -4.69336400 | 0.48776800  | 0.74136300  |
| H  | -5.38401700 | 1.28862900  | 0.98828600  |
| C  | -5.10896400 | -0.85987300 | 0.86988700  |
| H  | -6.11886600 | -1.08008700 | 1.20394400  |

|    |             |             |             |
|----|-------------|-------------|-------------|
| C  | -4.23765800 | -1.88795000 | 0.58701400  |
| H  | -4.54956700 | -2.92313200 | 0.69766200  |
| H  | -3.09093200 | 1.81900600  | 0.24426300  |
| Cl | 1.43839100  | 3.91343800  | -0.82364900 |
| H  | 0.51274600  | 0.41839300  | 2.51411100  |
| C  | 2.38901200  | 1.31584100  | 3.10551700  |
| H  | 2.91436200  | 2.28015500  | 3.07942800  |
| H  | 2.32319100  | 1.02363400  | 4.16727000  |
| H  | 3.05813000  | 0.58607100  | 2.62548000  |
| H  | 0.38168900  | 2.09804500  | 2.96084500  |
| C  | 1.99867900  | -1.81207700 | -1.69883700 |
| H  | 2.68196400  | -1.29693000 | -2.38221800 |
| H  | 1.37278700  | -2.48597400 | -2.29189800 |
| C  | 2.83689300  | -2.63396500 | -0.68116100 |
| H  | 2.17297500  | -3.10865000 | 0.05397300  |
| H  | 3.30578600  | -3.45233300 | -1.24351700 |
| C  | 3.92343800  | -1.83608800 | 0.05118600  |
| H  | 4.57716500  | -1.35478700 | -0.68850200 |
| H  | 3.46912200  | -1.02360900 | 0.63008000  |
| C  | 4.75949900  | -2.71968800 | 0.98323500  |
| H  | 5.26261800  | -3.52239000 | 0.42989000  |
| H  | 5.52992800  | -2.13186200 | 1.49322200  |
| H  | 4.13470300  | -3.18708700 | 1.75413700  |

Structure 13b-TSOMe-I [B3LYP/6-31G(d)]

|    |             |             |             |
|----|-------------|-------------|-------------|
| Cl | 0.90503000  | 4.31003300  | 0.03452500  |
| C  | 0.07624500  | -0.97772000 | -0.11900000 |
| C  | -0.28218800 | -2.35491300 | 0.07657200  |
| C  | -1.57662900 | -2.77198600 | 0.14615100  |
| C  | -2.65352100 | -1.83493400 | 0.00277400  |
| C  | -2.36179700 | -0.45655700 | -0.21420500 |
| C  | 1.44622700  | -0.56003200 | -0.03658400 |
| O  | 1.76535400  | 0.66781600  | 0.04570500  |
| O  | -0.75832400 | 1.15890600  | -1.03445800 |
| C  | -0.66335500 | 0.91089300  | -2.45539200 |
| H  | 0.51258300  | -3.08421900 | 0.19131700  |
| H  | -1.81274000 | -3.82135000 | 0.29775500  |
| H  | -0.53788700 | 1.89046000  | -2.91874100 |
| H  | -1.58573400 | 0.44071100  | -2.80575200 |
| H  | 0.19505200  | 0.27083900  | -2.67706900 |
| Mg | 0.44783500  | 2.12589300  | 0.26281200  |
| C  | -0.94848200 | 1.21631900  | 1.81042500  |
| H  | -2.01735200 | 1.40537400  | 1.69701700  |
| H  | -0.52226100 | 2.16200900  | 2.21969000  |
| C  | -0.97951600 | -0.00625500 | -0.21576400 |
| C  | -3.42668300 | 0.44892800  | -0.42360500 |
| C  | -4.74087700 | 0.01601600  | -0.40721600 |
| H  | -5.54776500 | 0.72562800  | -0.56567400 |
| C  | -5.03147800 | -1.34214500 | -0.17706900 |
| H  | -6.06430300 | -1.67945500 | -0.15938200 |
| C  | -4.00578400 | -2.24744500 | 0.02336100  |
| H  | -4.22693300 | -3.29848500 | 0.19206000  |
| H  | -3.19885300 | 1.49636800  | -0.59183100 |
| C  | -0.64007600 | 0.08439600  | 2.77347200  |
| H  | 0.41317200  | -0.22477500 | 2.71892500  |
| H  | -0.83395100 | 0.36157200  | 3.82012600  |
| H  | -1.24620300 | -0.80046300 | 2.55412500  |
| C  | 2.58078300  | -1.57419500 | 0.00949900  |
| H  | 2.53036400  | -2.10214900 | 0.97396800  |
| H  | 2.40566600  | -2.34365500 | -0.75384800 |
| C  | 3.97529500  | -0.96367900 | -0.16787100 |
| H  | 4.13869400  | -0.20029300 | 0.60110200  |
| H  | 4.02266400  | -0.43559800 | -1.12921500 |
| C  | 5.08877300  | -2.01648200 | -0.10148000 |
| H  | 5.03586000  | -2.54333900 | 0.86227300  |
| H  | 4.91994600  | -2.78034100 | -0.87437100 |
| C  | 6.48656100  | -1.41433300 | -0.27673300 |
| H  | 6.69897100  | -0.67377000 | 0.50365900  |
| H  | 7.26265200  | -2.18616500 | -0.22520400 |
| H  | 6.58159200  | -0.90921600 | -1.24558900 |

Structure 13b-TSOMe-II [B3LYP/6-31G(d)]

|    |             |             |             |
|----|-------------|-------------|-------------|
| Cl | -0.65183400 | 4.27044000  | 0.09055700  |
| C  | -0.22384000 | -1.04738600 | -0.10411700 |
| C  | 0.07971500  | -2.37587500 | -0.55638000 |
| C  | 1.35526800  | -2.84621100 | -0.64824900 |
| C  | 2.46460400  | -2.04038400 | -0.22424100 |
| C  | 2.22834800  | -0.71491700 | 0.24419300  |
| C  | -1.55989400 | -0.53777200 | -0.17547800 |
| O  | -1.80216800 | 0.71122600  | -0.11484500 |
| O  | 0.66750300  | 0.91281600  | 1.10708200  |

|                                          |             |             |             |                                         |            |             |             |             |
|------------------------------------------|-------------|-------------|-------------|-----------------------------------------|------------|-------------|-------------|-------------|
| C                                        | 0.38255800  | 0.53031500  | 2.47208000  | H                                       | 6.91086400 | -2.26178200 | -0.88387200 |             |
| H                                        | -0.73956300 | -3.01565200 | -0.86638000 | H                                       | 5.41197000 | -2.68894400 | -1.72336200 |             |
| H                                        | 1.54801200  | -3.85296600 | -1.00768600 |                                         |            |             |             |             |
| H                                        | 0.30252900  | 1.46508600  | 3.02876400  |                                         |            |             |             |             |
| H                                        | 1.20593100  | -0.07401100 | 2.86107800  | Structure 13b-TSOMe-IV [B3LYP/6-31G(d)] | Cl         | 0.91005800  | 4.46841600  | 0.33991900  |
| H                                        | -0.55601400 | -0.02727800 | 2.52657600  |                                         | C          | -0.61601200 | -0.59559400 | -0.41609100 |
| Mg                                       | -0.35758800 | 2.06632600  | -0.20538300 |                                         | C          | -0.75721300 | -1.91847200 | -0.95757700 |
| C                                        | 1.03724600  | 1.16813900  | -1.75533400 |                                         | C          | 0.25605800  | -2.82931300 | -0.94837500 |
| C                                        | 0.88172200  | -0.17162400 | 0.18820700  |                                         | C          | 1.51328300  | -2.51992900 | -0.33002900 |
| C                                        | 3.30940900  | 0.04268100  | 0.74754700  |                                         | C          | 1.71185800  | -1.22980500 | 0.24303500  |
| C                                        | 4.59191600  | -0.48069600 | 0.77340900  |                                         | C          | -1.64510200 | 0.38609800  | -0.58478800 |
| H                                        | 5.41224600  | 0.11402700  | 1.16452300  |                                         | O          | -1.42404300 | 1.62704100  | -0.39239200 |
| C                                        | 4.83100400  | -1.77766800 | 0.28515300  |                                         | O          | 0.74397500  | 0.80550100  | 1.10178000  |
| H                                        | 5.83874700  | -2.18404800 | 0.29835000  |                                         | C          | 0.14936800  | 0.47535200  | 2.37768200  |
| C                                        | 3.78518600  | -2.54134200 | -0.20307100 |                                         | H          | -1.70288700 | -2.19299600 | -1.41165900 |
| H                                        | 3.96604900  | -3.55063100 | -0.56459800 |                                         | H          | 0.11456500  | -3.81633600 | -1.37928000 |
| H                                        | 3.12152500  | 1.04490500  | 1.11691900  |                                         | H          | 0.33710900  | 1.33638700  | 3.02063600  |
| H                                        | 0.18349300  | 1.54930700  | -2.35618900 |                                         | H          | 0.63279700  | -0.41597400 | 2.78568200  |
| C                                        | 2.22986400  | 2.11549800  | -1.84169700 |                                         | Hg         | -0.92540100 | 0.30821200  | 2.26885400  |
| H                                        | 2.59236200  | 2.22129500  | -2.87659400 |                                         | Mg         | 0.41242800  | 2.34262300  | -0.17764700 |
| H                                        | 1.99611700  | 3.12617600  | -1.48283300 |                                         | C          | 1.58347900  | 1.08931700  | -1.66408400 |
| H                                        | 3.07499000  | 1.74135200  | -1.25237000 |                                         | C          | 0.67631400  | -0.22155200 | 0.09998300  |
| H                                        | 1.25934300  | 0.19172600  | -2.18306600 |                                         | C          | 2.91449600  | -0.95928300 | 0.93407900  |
| C                                        | -2.75171400 | -1.45987400 | -0.38296300 |                                         | C          | 3.90392100  | -1.92283000 | 1.04082400  |
| H                                        | -2.82015500 | -1.68552700 | -1.45920600 |                                         | H          | 4.82238900  | -1.69948900 | 1.57575600  |
| H                                        | -2.56795300 | -2.41975500 | 0.11315000  |                                         | C          | 3.72130000  | -3.18603500 | 0.44977400  |
| C                                        | -4.08449100 | -0.86872000 | 0.09543600  |                                         | H          | 4.50186400  | -3.93807600 | 0.52727200  |
| H                                        | -4.26171200 | 0.08507300  | -0.41287900 |                                         | C          | 2.54656000  | -3.47702300 | -0.22121200 |
| H                                        | -4.01392500 | -0.63299100 | 1.16617300  |                                         | H          | 2.39647900  | -4.45897200 | -0.66312100 |
| C                                        | -5.26504800 | -1.81822600 | -0.14404300 |                                         | H          | 3.05380700  | 0.01805000  | 1.38305300  |
| H                                        | -5.33185000 | -2.05206900 | -1.21637700 |                                         | H          | 1.01401800  | 1.78916600  | -2.31243700 |
| H                                        | -5.07639000 | -2.77493000 | 0.36419900  |                                         | C          | 3.03455600  | 1.53556200  | -1.51550700 |
| C                                        | -6.60006700 | -1.24048200 | 0.33636100  |                                         | H          | 3.55859600  | 1.55142800  | -2.48446300 |
| H                                        | -6.83343400 | -0.30124400 | -0.17928800 |                                         | H          | 3.12758400  | 2.54212900  | -1.08781700 |
| H                                        | -7.42549000 | -1.93711500 | 0.15173000  |                                         | H          | 3.59372000  | 0.84826700  | -0.87004200 |
| H                                        | -6.57602300 | -1.02920400 | 1.41236000  |                                         | H          | 1.50135300  | 0.12373700  | -2.16017000 |
|                                          |             |             |             |                                         | C          | -3.05913000 | 0.01873500  | -0.99112200 |
| Structure 13b-TSOMe-III [B3LYP/6-31G(d)] |             |             |             |                                         | H          | -3.06099700 | -0.71007200 | -1.80937300 |
| Cl                                       | -0.16362300 | 4.59545700  | -0.36265100 |                                         | H          | -3.52247000 | 0.93553900  | -1.36854500 |
| C                                        | 0.40134200  | -0.69067100 | 0.32941500  |                                         | C          | -3.88766300 | -0.53233100 | 0.18982600  |
| C                                        | 0.34957100  | -2.07837900 | 0.70003000  |                                         | H          | -3.41414800 | -1.44461800 | 0.57707000  |
| C                                        | -0.78960700 | -2.81919800 | 0.61426000  |                                         | H          | -3.87074900 | 0.20072700  | 1.00803600  |
| C                                        | -2.00506300 | -2.23669300 | 0.12342600  |                                         | C          | -5.34129300 | -0.83145200 | -0.19845800 |
| C                                        | -2.01302100 | -0.87093200 | -0.28411500 |                                         | H          | -5.80537300 | 0.08351500  | -0.59150600 |
| C                                        | 1.57319200  | 0.10028100  | 0.57367100  |                                         | H          | -5.35326700 | -1.55856300 | -1.02285000 |
| O                                        | 1.55601500  | 1.36953500  | 0.47033800  |                                         | C          | -6.17348000 | -1.36771500 | 0.97050800  |
| O                                        | -0.71100900 | 0.99638000  | -1.09368200 |                                         | H          | -6.20975500 | -0.64602800 | 1.79552400  |
| C                                        | -0.25004500 | 0.60703900  | -2.40693400 |                                         | H          | -7.20473100 | -1.57258700 | 0.66231500  |
| H                                        | 1.25203400  | -2.54768400 | 1.07534500  |                                         | H          | -5.75187800 | -2.30070700 | 1.36428800  |
| H                                        | -0.79152700 | -3.86539000 | 0.90656900  |                                         |            |             |             |             |
| H                                        | -0.26983700 | 1.51739300  | -3.00771100 | Structure 13b-TSOMe-V [B3LYP/6-31G(d)]  | Cl         | -0.06506000 | 4.58379200  | 0.32936200  |
| H                                        | -0.92965200 | -0.13957100 | -2.82585200 |                                         | C          | 0.30463500  | -0.67461000 | -0.61168300 |
| H                                        | 0.76610700  | 0.20663200  | -2.35400100 |                                         | C          | 0.32159700  | -2.11134100 | -0.58216400 |
| Mg                                       | -0.09154500 | 2.42300700  | 0.19357300  |                                         | C          | -0.78702700 | -2.85181300 | -0.30531700 |
| C                                        | -1.50318700 | 1.37467000  | 1.63532600  |                                         | C          | -2.04661500 | -2.21384700 | -0.05107900 |
| H                                        | -2.53730700 | 1.22798000  | 1.31970100  |                                         | C          | -2.13299200 | -0.79145100 | -0.08601200 |
| H                                        | -1.42888000 | 2.44729900  | 1.92893900  |                                         | C          | 1.51828700  | 0.07287800  | -0.76304000 |
| C                                        | -0.81158700 | -0.06889900 | -0.13079000 |                                         | O          | 1.57118600  | 1.32231000  | -0.52050100 |
| C                                        | -3.19484100 | -0.32154000 | -0.83159500 |                                         | O          | -1.18387200 | 1.26908200  | -0.92580200 |
| C                                        | -4.33971600 | -1.08754200 | -0.96174500 |                                         | C          | -1.39916900 | 1.23585700  | -2.35490100 |
| H                                        | -5.24109100 | -0.64891800 | -1.37990000 |                                         | H          | 1.26099300  | -2.62119900 | -0.76614500 |
| C                                        | -4.33826300 | -2.43219300 | -0.54436000 |                                         | H          | -0.73715900 | -3.93674800 | -0.28762700 |
| H                                        | -5.24004500 | -3.03050400 | -0.64233400 |                                         | H          | -1.59965100 | 2.26762700  | -2.64678200 |
| C                                        | -3.19160100 | -2.99319600 | -0.01310800 |                                         | H          | -2.26194800 | 0.60332400  | -2.57889200 |
| H                                        | -3.18488700 | -4.03395200 | 0.30128800  |                                         | Hg         | -0.51060100 | 0.85935300  | -2.86906900 |
| H                                        | -3.19452800 | 0.71781300  | -1.14317600 |                                         | Mg         | 0.06368400  | 2.34544200  | 0.24356000  |
| C                                        | -1.10509300 | 0.51028500  | 2.81680500  |                                         | C          | -0.66746600 | 0.92945700  | 1.84625700  |
| H                                        | -0.01453400 | 0.48129700  | 2.95399500  |                                         | H          | -1.74616800 | 0.84591900  | 2.00925100  |
| H                                        | -1.53283700 | 0.87164300  | 3.76349300  |                                         | H          | -0.37712100 | 1.89565100  | 2.34026200  |
| H                                        | -1.43770500 | -0.52411400 | 2.68283300  |                                         | C          | -0.93128800 | -0.00509500 | -0.30617800 |
| C                                        | 2.90916500  | -0.50814500 | 0.95192800  |                                         | C          | -3.39002000 | -0.17178000 | 0.09830500  |
| H                                        | 2.79282000  | -1.36030900 | 1.62887800  |                                         | C          | -4.52780300 | -0.92681400 | 0.32202400  |
| H                                        | 3.46346700  | 0.26724500  | 1.49021200  |                                         | H          | -5.48547800 | -0.43505000 | 0.46600500  |
| C                                        | 3.71482600  | -0.94236100 | -0.29289500 |                                         | H          | -4.44178300 | -2.33116600 | 0.37172700  |
| H                                        | 3.15749400  | -1.71574400 | -0.83939700 |                                         | C          | -5.33546600 | -2.92223000 | 0.55271700  |
| H                                        | 3.80794300  | -0.08328900 | -0.97083100 |                                         | C          | -3.22378600 | -2.95945900 | 0.18820900  |
| C                                        | 5.11120900  | -1.46859300 | 0.06238900  |                                         | H          | -3.15645900 | -4.04421000 | 0.21702000  |
| H                                        | 5.65879100  | -0.69243600 | 0.61445900  |                                         | H          | -3.44969000 | 0.91133200  | 0.06982500  |
| H                                        | 5.01343300  | -2.32129300 | 0.74915800  |                                         | C          | 0.11393700  | -0.19336500 | 2.52246900  |
| C                                        | 5.91998300  | -1.89076700 | -1.16833700 |                                         | H          | 1.16232000  | -0.20796200 | 2.19358600  |
| H                                        | 6.06440100  | -1.04855500 | -1.85570100 |                                         |            |             |             |             |



|   |             |             |             |   |             |             |             |
|---|-------------|-------------|-------------|---|-------------|-------------|-------------|
| H | 0.12789000  | -0.10817700 | 3.61916500  | H | 2.24032000  | 0.91188500  | 1.99387800  |
| H | -0.31330600 | -1.17115300 | 2.27795000  | H | 1.57324100  | -0.70085600 | 2.03483700  |
| C | 2.83255300  | -0.57300200 | -1.15335800 | C | -1.27994400 | 0.00909900  | -0.35186900 |
| H | 3.36680900  | 0.15990200  | -1.76832700 | C | -3.66946500 | 0.69710400  | -0.09256700 |
| H | 2.67491900  | -1.46461400 | -1.76828300 | C | -4.98696700 | 0.34072600  | 0.08673800  |
| C | 3.70275800  | -0.92328400 | 0.07421100  | H | -5.75125700 | 1.11099400  | 0.13891200  |
| H | 3.17289400  | -1.65126800 | 0.70378300  | C | -5.35556000 | -1.02056000 | 0.21597700  |
| H | 3.83140300  | -0.01838800 | 0.68174400  | H | -6.40047100 | -1.28475700 | 0.35142500  |
| C | 5.07583300  | -1.48363500 | -0.31693200 | C | -4.39145300 | -2.00207800 | 0.18943100  |
| H | 5.60042800  | -0.74853100 | -0.94284600 | H | -4.66350600 | -3.04763400 | 0.31049300  |
| H | 4.93938000  | -2.37675100 | -0.94330900 | H | -3.39211300 | 1.74325400  | -0.15956500 |
| C | 5.94209400  | -1.83664300 | 0.89654200  | C | 0.14284000  | 0.81542600  | 2.61232800  |
| H | 6.91587800  | -2.23259600 | 0.58753100  | H | -0.05592400 | 1.89124700  | 2.49790200  |
| H | 6.12380200  | -0.95542800 | 1.52331000  | H | -0.78227700 | 0.28639700  | 2.35195300  |
| H | 5.45715600  | -2.59502800 | 1.52320900  | H | 0.31024500  | 0.65098500  | 3.68773900  |

Structure 13b-TSOMe-VI [B3LYP/6-31G(d)]

|    |             |             |             |
|----|-------------|-------------|-------------|
| Cl | 0.03058500  | 4.45725900  | 0.15513200  |
| C  | 0.40571000  | -0.82390300 | -0.54427300 |
| C  | 0.43020000  | -2.23522500 | -0.27826200 |
| C  | -0.68436300 | -2.93545500 | 0.07365800  |
| C  | -1.96650700 | -2.29303300 | 0.12760100  |
| C  | -2.06033700 | -0.89560200 | -0.13836400 |
| C  | 1.61808800  | -0.09293000 | -0.74862300 |
| O  | 1.66207500  | 1.17778300  | -0.64370200 |
| O  | -1.06225800 | 1.09026600  | -1.07904900 |
| C  | -1.14792200 | 0.96221100  | -2.51711300 |
| H  | 1.38079200  | -2.75500800 | -0.33095200 |
| H  | -0.62459500 | -4.00023300 | 0.28001600  |
| H  | -1.36677500 | 1.96410200  | -2.88896900 |
| H  | -1.95889300 | 0.27612100  | -2.77421200 |
| H  | -0.20100900 | 0.60197700  | -2.92751000 |
| Mg | 0.14601500  | 2.21730300  | 0.09646500  |
| C  | -0.57707400 | 0.87398700  | 1.77822500  |
| C  | -0.84473300 | -0.13268700 | -0.35887800 |
| C  | -3.33337100 | -0.28367400 | -0.17685900 |
| C  | -4.48233300 | -1.02109100 | 0.05803400  |
| H  | -5.45372600 | -0.53648300 | 0.02389400  |
| C  | -4.38889000 | -2.39409400 | 0.34846200  |
| H  | -5.29053900 | -2.96942000 | 0.54045500  |
| C  | -3.15308100 | -3.01610600 | 0.38120300  |
| H  | -3.08089800 | -4.08088200 | 0.58865500  |
| H  | -3.39996800 | 0.77665100  | -0.39472600 |
| H  | 0.35732000  | 1.32150500  | 2.18030200  |
| C  | -1.80601900 | 1.55476900  | 2.37151700  |
| H  | -1.84665600 | 1.44028800  | 3.46655300  |
| H  | -1.83562800 | 2.63212900  | 2.16406900  |
| H  | -2.73026200 | 1.11518900  | 1.97871200  |
| H  | -0.51916600 | -0.17794700 | 2.05339100  |
| C  | 2.94237300  | -0.77119200 | -1.03320400 |
| H  | 3.46232600  | -0.14336900 | -1.76632300 |
| H  | 2.80185700  | -1.75693800 | -1.48729100 |
| C  | 3.81811900  | -0.88535100 | 0.23387500  |
| H  | 3.30303900  | -1.50441400 | 0.98170000  |
| H  | 3.92484100  | 0.11390100  | 0.67454900  |
| C  | 5.20449000  | -1.47534600 | -0.05345800 |
| H  | 5.71307800  | -0.85260300 | -0.80249500 |
| H  | 5.09097100  | -2.46967700 | -0.50848800 |
| C  | 6.07583300  | -1.58331000 | 1.20191000  |
| H  | 7.05983600  | -2.00444200 | 0.96752400  |
| H  | 6.23404900  | -0.59944400 | 1.65970700  |
| H  | 5.60813700  | -2.22823500 | 1.95590500  |

Structure 13b-TSCO-I [B3LYP/6-31G(d)]

|    |             |             |             |
|----|-------------|-------------|-------------|
| Cl | 1.49815500  | 3.95513200  | 0.13734500  |
| C  | -0.27599500 | -0.95149300 | -0.29242400 |
| C  | -0.67565600 | -2.30243300 | -0.08372400 |
| C  | -1.99739800 | -2.65400600 | 0.04131000  |
| C  | -3.02093800 | -1.67243500 | 0.01817400  |
| C  | -2.65421300 | -0.29796200 | -0.15340000 |
| C  | 1.18025400  | -0.58016400 | -0.44200800 |
| O  | 1.49191400  | 0.37133100  | -1.26527500 |
| O  | -0.93423800 | 1.36054200  | -0.50883400 |
| C  | -1.14675700 | 1.88526300  | -1.85418300 |
| H  | 0.08141000  | -3.07666800 | -0.04557000 |
| H  | -2.27243600 | -3.69703800 | 0.17473800  |
| H  | -0.91280200 | 2.94960100  | -1.79636100 |
| H  | -2.18901000 | 1.73822800  | -2.14252500 |
| H  | -0.47276600 | 1.37642900  | -2.54671100 |
| Mg | 1.08240400  | 1.75235200  | 0.06755900  |
| C  | 1.32842700  | 0.32558300  | 1.76719700  |

Structure 13b-TSCO-II [B3LYP/6-31G(d)]

|    |             |             |             |
|----|-------------|-------------|-------------|
| Cl | 1.42245400  | 3.94889500  | 0.11169100  |
| C  | -0.39774800 | -0.94119400 | -0.26195900 |
| C  | -0.80478100 | -2.28423900 | -0.02103800 |
| C  | -2.12658200 | -2.62054900 | 0.14196800  |
| C  | -3.14069600 | -1.62938800 | 0.12643800  |
| C  | -2.76478600 | -0.26190600 | -0.07804500 |
| C  | 1.06327700  | -0.58305500 | -0.42895500 |
| O  | 1.37264400  | 0.35846100  | -0.26201500 |
| O  | -1.04010000 | 1.37530500  | -0.49468100 |
| C  | -1.26617300 | 1.88156000  | -1.84435700 |
| H  | -0.05351800 | -3.06414500 | 0.01968400  |
| H  | -2.40803100 | -3.65806300 | 0.30238200  |
| H  | -1.01934000 | 2.94389500  | -1.80662700 |
| H  | -2.31415700 | 1.74216200  | -1.12562800 |
| H  | -0.60809100 | 1.35483800  | -2.53884000 |
| Mg | 0.98111700  | 1.75053100  | 0.06752100  |
| C  | 1.10102900  | 0.32378100  | 1.78837600  |
| H  | 0.23469900  | 0.93733800  | 2.11649100  |
| C  | -1.39314700 | 0.02826600  | -0.31326900 |
| C  | -3.76829200 | 0.74459400  | -0.01047200 |
| C  | -5.08430800 | 0.40509400  | 0.20764000  |
| H  | -5.83951800 | 1.18394000  | 0.26449100  |
| C  | -5.46297200 | -0.94990500 | 0.37044300  |
| H  | -6.50677100 | -1.20075300 | 0.53642400  |
| C  | -4.50981900 | -1.94178700 | 0.33724400  |
| H  | -4.78928900 | -2.98217100 | 0.48330600  |
| H  | -3.48234900 | 1.78634600  | -0.10413600 |
| C  | 0.82205600  | -0.69209500 | 2.06741200  |
| H  | 2.37505200  | 0.75630300  | 2.52928400  |
| H  | 2.23563200  | 0.75068000  | 3.62159500  |
| H  | 3.20980400  | 0.08061300  | 2.31268500  |
| H  | 2.70697600  | 1.77087400  | 2.26751100  |
| C  | 2.09509200  | -1.68578000 | -0.22647100 |
| H  | 1.86447500  | -2.46369700 | -0.97321900 |
| H  | 1.97178200  | -2.15791800 | 0.75377200  |
| C  | 3.54263600  | -1.23119700 | -0.43948600 |
| C  | 3.64111500  | -0.82034100 | -1.45010900 |
| H  | 3.77629500  | -0.40812500 | 0.24679700  |
| C  | 4.55160700  | -2.36889100 | -0.23592200 |
| H  | 4.30988900  | -3.19764100 | -0.91723700 |
| H  | 4.44952500  | -2.77303700 | 0.78161900  |
| C  | 6.00033900  | -1.92675800 | -0.46583000 |
| H  | 6.28285300  | -1.12189400 | 0.22359200  |
| H  | 6.69988400  | -2.75658900 | -0.31439800 |
| H  | 6.14223300  | -1.55161400 | -1.48652400 |

Structure 13b-TSCO-III [B3LYP/6-31G(d)]

|    |             |             |             |
|----|-------------|-------------|-------------|
| Cl | 0.45486600  | 4.48879500  | -0.28760700 |
| C  | 0.12791400  | -0.71937400 | 0.09378900  |
| C  | 0.05583700  | -2.06970900 | 0.54193200  |
| C  | -1.13028500 | -2.76121900 | 0.56680000  |

|                                        |             |             |             |                                        |             |             |             |
|----------------------------------------|-------------|-------------|-------------|----------------------------------------|-------------|-------------|-------------|
| C                                      | -2.34889300 | -2.13768600 | 0.19510500  | C                                      | 4.38956800  | -2.51393500 | -0.13309400 |
| C                                      | -2.32244000 | -0.76653500 | -0.21977900 | H                                      | 5.13929200  | -1.75620800 | 0.13379100  |
| C                                      | 1.43852800  | 0.02555500  | 0.05492400  | H                                      | 4.18735300  | -3.08011000 | 0.78751900  |
| O                                      | 1.63581200  | 0.88789900  | -0.88928200 | C                                      | 4.96742800  | -3.45487000 | -1.19530900 |
| O                                      | -1.05454700 | 1.23442900  | -0.68682800 | H                                      | 5.88439600  | -3.93885200 | -0.84084600 |
| C                                      | -1.13127900 | 1.45070200  | -2.12827700 | H                                      | 4.25297400  | -4.24505600 | -1.45703000 |
| H                                      | 0.96446500  | -2.57243400 | 0.85126700  | H                                      | 5.21119900  | -2.91076600 | -2.11566600 |
| H                                      | -1.14796100 | -3.79883400 | 0.88990100  |                                        |             |             |             |
| H                                      | -1.18517000 | 2.53243000  | -2.26131700 | Structure 13b-TSCO-V [B3LYP/6-31G(d)]  |             |             |             |
| H                                      | -2.02951700 | 0.97121100  | -2.52134100 | Cl                                     | 0.43101800  | 4.54699600  | 0.19868000  |
| H                                      | -0.23200900 | 1.04661700  | -2.59775400 | C                                      | 0.09780900  | -0.64541900 | -0.55940400 |
| Mg                                     | 0.63880000  | 2.28297200  | 0.08098600  | C                                      | 0.12864100  | -2.06851800 | -0.58014900 |
| C                                      | 0.94442300  | 1.28987300  | 2.05131300  | C                                      | -1.00270600 | -2.82067200 | -0.37658800 |
| H                                      | 1.68389000  | 2.08404700  | 2.27420900  | C                                      | -2.24730500 | -2.20462400 | -0.09174600 |
| H                                      | 1.33535200  | 0.38927300  | 2.52234800  | C                                      | -2.31579000 | -0.77382300 | -0.05455700 |
| C                                      | -1.06174800 | -0.11371000 | -0.29882400 | C                                      | 1.34523000  | 0.17215300  | -0.79863700 |
| C                                      | -3.55199600 | -0.11234800 | -0.51084900 | O                                      | 1.22971800  | 1.24027200  | -1.52220900 |
| C                                      | -4.74300600 | -0.79834800 | -0.43509600 | O                                      | -1.22865600 | 1.36402400  | -0.34091300 |
| H                                      | -5.67529900 | -0.28528600 | -0.65361600 | C                                      | -1.80347900 | 1.92730600  | -1.55968300 |
| C                                      | -4.76673100 | -2.16474000 | -0.06364800 | H                                      | 1.06320600  | -2.57216600 | -0.79427400 |
| H                                      | -5.71483400 | -2.69257800 | -0.01399700 | H                                      | -0.95066600 | -3.90532800 | -0.42285400 |
| C                                      | -3.59549200 | -2.81497400 | 0.25130800  | H                                      | -1.85628700 | 3.00411300  | -1.39048400 |
| H                                      | -3.60748300 | -3.85753100 | 0.55914200  | H                                      | -2.80162200 | 1.51513000  | -1.71734600 |
| H                                      | -3.54518100 | 0.94138700  | -0.76638100 | H                                      | -1.14743800 | 1.69965900  | -2.40266500 |
| C                                      | -0.43332200 | 1.62478200  | 2.64361800  | Mg                                     | 0.64728900  | 2.32045400  | 0.00734000  |
| H                                      | -0.81558400 | 2.60535900  | 2.32344300  | C                                      | 1.47921000  | 0.89754300  | 1.49589900  |
| H                                      | -1.18353300 | 0.87584000  | 2.35701700  | H                                      | 2.38784200  | 1.50252200  | 1.66458400  |
| H                                      | -0.41748300 | 1.64924900  | 3.74422900  | H                                      | 1.76512000  | -0.13652200 | 1.66478900  |
| C                                      | 2.69041400  | -0.62815400 | 0.61920200  | C                                      | -1.13559400 | -0.03690100 | -0.34906800 |
| H                                      | 2.47488300  | -1.23032500 | 1.50704600  | C                                      | -3.54856600 | -0.15329700 | 0.29276900  |
| H                                      | 3.35917500  | 0.17985700  | 0.93378200  | C                                      | -4.66450000 | -0.91507400 | 0.55536900  |
| C                                      | 3.40907400  | -1.47795700 | -0.44993700 | H                                      | -5.59686200 | -0.42899400 | 0.82850000  |
| H                                      | 2.74955900  | -2.28582300 | -0.79762000 | C                                      | -4.60700700 | -2.32851800 | 0.48382300  |
| H                                      | 3.60635400  | -0.84290200 | -1.32141400 | H                                      | -5.49861900 | -2.91441900 | 0.68814800  |
| C                                      | 4.72191400  | -2.08032700 | 0.06693800  | C                                      | -3.42271300 | -2.95628000 | 0.17350800  |
| H                                      | 5.37897500  | -1.26967900 | 0.41153300  | H                                      | -3.36565200 | -4.04125400 | 0.13544000  |
| H                                      | 4.51760900  | -2.70272000 | 0.95006700  | H                                      | -3.59262900 | 0.92677100  | 0.37870900  |
| C                                      | 5.45049900  | -2.91633200 | -0.99009700 | C                                      | 0.37226800  | 1.25982700  | 2.51004900  |
| H                                      | 6.38508600  | -3.33024000 | -0.59509900 | H                                      | 0.07733400  | 2.32019300  | 2.48808500  |
| H                                      | 4.83106900  | -3.75592300 | -1.32891400 | H                                      | -0.53555700 | 0.66655100  | 2.34165400  |
| H                                      | 5.69872300  | -2.31180500 | -1.87068300 | H                                      | 0.69200400  | 1.06035400  | 3.54433900  |
|                                        |             |             |             | C                                      | 2.70434100  | -0.52118300 | -0.93146500 |
| Structure 13b-TSCO-IV [B3LYP/6-31G(d)] |             |             |             | H                                      | 3.40010400  | 0.27821800  | -1.20426100 |
| Cl                                     | 0.66877300  | 4.41646600  | -0.38334700 | H                                      | 2.59889300  | -1.13321400 | -1.84374600 |
| C                                      | -0.04402400 | -0.73680500 | 0.08029700  | C                                      | 3.32976000  | -1.38308900 | 0.17843300  |
| C                                      | -0.20276300 | -2.07509100 | 0.54191700  | C                                      | 2.58992600  | -2.04865200 | 0.63963100  |
| C                                      | -1.43971100 | -2.66240400 | 0.64618500  | H                                      | 3.69461200  | -0.73230400 | 0.98041500  |
| C                                      | -2.62111100 | -1.93680300 | 0.34836800  | C                                      | 4.50204900  | -2.22407600 | -0.34939900 |
| C                                      | -2.50320200 | -0.57428800 | -0.07898900 | H                                      | 5.23161500  | -1.56249000 | -0.83712000 |
| C                                      | 1.32388400  | -0.10699300 | -0.03660200 | H                                      | 4.13994600  | -2.90483500 | -1.13368900 |
| O                                      | 1.54280300  | 0.73203900  | -0.99365200 | C                                      | 5.19904300  | -3.03295400 | 0.74875600  |
| O                                      | -1.10247400 | 1.30706200  | -0.64627900 | H                                      | 6.02644700  | -3.62523000 | 0.34241500  |
| C                                      | -1.25148200 | 1.52314100  | -2.08191600 | H                                      | 5.60939000  | -2.37609200 | 1.52522700  |
| H                                      | 0.67682800  | -2.65262500 | 0.79966300  | H                                      | 4.50145800  | -3.72515400 | 1.23638100  |
| H                                      | -1.52561500 | -3.69378100 | 0.97807700  |                                        |             |             |             |
| H                                      | -1.20876400 | 2.60437400  | -2.22239100 | Structure 13b-TSCO-VI [B3LYP/6-31G(d)] |             |             |             |
| H                                      | -2.21540100 | 1.13090900  | -2.41116700 | Cl                                     | 0.65874600  | 4.48820600  | 0.20396400  |
| H                                      | -0.42806300 | 1.03177000  | -2.60445700 | C                                      | -0.08156500 | -0.65036500 | -0.57404600 |
| Mg                                     | 0.70783100  | 2.20824400  | 0.02265300  | C                                      | -0.18841500 | -2.06864800 | -0.64988300 |
| C                                      | 1.00655600  | 1.20372400  | 1.98812000  | C                                      | -1.37287000 | -2.72054400 | -0.40703400 |
| H                                      | 0.05462600  | 1.70146200  | 2.26554200  | C                                      | -2.53331000 | -2.00443600 | -0.01936600 |
| C                                      | -1.19922000 | -0.03349300 | -0.24499000 | C                                      | -2.46362000 | -0.57614000 | 0.06848500  |
| C                                      | -3.68789700 | 0.18360000  | -0.29541900 | C                                      | 1.22753800  | 0.05183800  | -0.85328500 |
| C                                      | -4.92623600 | -0.39632900 | -0.13787500 | O                                      | 1.18985500  | 1.13249700  | -1.55919500 |
| H                                      | -5.82295800 | 0.19503900  | -0.30003200 | O                                      | -1.20910000 | 1.46182500  | -0.24101200 |
| C                                      | -5.04369900 | -1.75487900 | 0.24483700  | C                                      | -1.81556400 | 2.10005600  | -1.40723500 |
| H                                      | -6.02865400 | -2.19847900 | 0.35919300  | H                                      | 0.67937600  | -2.64729300 | -0.94162100 |
| C                                      | -3.91528900 | -2.50355100 | 0.48927900  | H                                      | -1.42720600 | -3.80218500 | -0.49835300 |
| H                                      | -3.99744200 | -3.54041900 | 0.80541900  | H                                      | -1.75477500 | 3.17316100  | -1.21937700 |
| H                                      | -3.60640000 | 1.23201400  | -0.55983300 | H                                      | -2.85591900 | 1.78353200  | -1.49808500 |
| H                                      | 0.93502400  | 0.21224700  | 2.43619000  | H                                      | -1.24540400 | 1.82988900  | -2.29910600 |
| C                                      | 2.20806700  | 1.97424900  | 2.55178200  | Mg                                     | 0.74603100  | 2.25182400  | 0.00167000  |
| H                                      | 2.20316300  | 2.01185500  | 3.65232400  | C                                      | 1.51394100  | 0.79758000  | 1.47459600  |
| H                                      | 3.15934300  | 1.50927100  | 2.26032200  | H                                      | 0.69300900  | 1.19902700  | 2.10430500  |
| H                                      | 2.24488400  | 3.01751900  | 2.20785700  | C                                      | -1.24073600 | 0.06000600  | -0.27982800 |
| C                                      | 2.53650800  | -0.85929700 | 0.48059100  | C                                      | -3.60689300 | 0.14234000  | 0.51779400  |
| H                                      | 2.31697400  | -1.40372200 | 1.40413700  | C                                      | -4.77098600 | -0.52231500 | 0.82999000  |
| H                                      | 3.29894700  | -0.11142200 | 0.71858600  | C                                      | -5.63316600 | 0.03675400  | 1.18239900  |
| C                                      | 3.10612800  | -1.81129900 | -0.59423900 | H                                      | -4.85280500 | -1.93105500 | 0.70724600  |
| H                                      | 2.35649800  | -2.56651000 | -0.86917500 | H                                      | -5.78128600 | -2.43931800 | 0.95136200  |
| H                                      | 3.30501800  | -1.22822200 | -1.50117100 | C                                      | -3.75582500 | -2.65366800 | 0.29783300  |

|                                       |             |             |             |                                        |             |             |             |
|---------------------------------------|-------------|-------------|-------------|----------------------------------------|-------------|-------------|-------------|
| H                                     | -3.80483600 | -3.73690600 | 0.22048900  | O                                      | -0.56705800 | -0.91204000 | -0.38752100 |
| H                                     | -3.54170700 | 1.21750000  | 0.64306100  | C                                      | -0.69791700 | -1.75504600 | -1.57231800 |
| H                                     | 1.50906700  | -0.27074000 | 1.68271200  | H                                      | 1.00179500  | 3.34342100  | -0.78272100 |
| C                                     | 2.85379700  | 1.44067200  | 1.86179100  | H                                      | 3.33075300  | 2.64620700  | -0.33600700 |
| H                                     | 3.16099400  | 1.19432000  | 2.89052000  | H                                      | -1.52152300 | -2.43661200 | -1.35583400 |
| H                                     | 3.66741200  | 1.11325000  | 1.20125000  | H                                      | 0.22993800  | -2.30751800 | -1.73175900 |
| H                                     | 2.82759400  | 2.53816400  | 1.80496400  | H                                      | -0.93302300 | -1.12709900 | -2.43451300 |
| C                                     | 2.51458900  | -0.75999000 | -0.98721100 | Mg                                     | -2.46215900 | 0.04542600  | 0.05015200  |
| H                                     | 3.29476200  | -0.02618300 | -1.21362700 | C                                      | -1.92265200 | 1.69634100  | 1.43268000  |
| H                                     | 2.37512700  | -1.32598800 | -1.92458600 | H                                      | -2.99500300 | 1.75050200  | 1.70646000  |
| C                                     | 3.01082400  | -1.71952000 | 0.10864500  | H                                      | -1.61469100 | 2.73837500  | 1.31756800  |
| H                                     | 2.18912100  | -2.30939900 | 0.53014300  | C                                      | 0.48567000  | 0.00759600  | -0.42775700 |
| H                                     | 3.42321200  | -1.13975700 | 0.94015500  | C                                      | 2.10141100  | -1.77377600 | 0.24824300  |
| C                                     | 4.09603800  | -2.67012700 | -0.41986200 | C                                      | 3.39482700  | -2.14134900 | 0.54170500  |
| H                                     | 4.90900600  | -2.07958900 | -0.86510700 | H                                      | 3.61575400  | -3.17015400 | 0.81127300  |
| H                                     | 3.68302500  | -3.27976200 | -1.23685300 | C                                      | 4.44076200  | -1.18713800 | 0.50599600  |
| C                                     | 4.66562200  | -3.58752600 | 0.66651000  | H                                      | 5.45695700  | -1.49494900 | 0.73512300  |
| H                                     | 5.43606400  | -4.25361100 | 0.26241900  | C                                      | 4.16958300  | 0.12736800  | 0.20093300  |
| H                                     | 5.11963800  | -3.00557800 | 1.47763800  | H                                      | 4.96551600  | 0.86767700  | 0.19413300  |
| H                                     | 3.88121800  | -4.21420300 | 1.10867100  | H                                      | 1.29957900  | -2.50169100 | 0.30523900  |
| Structure 13c_I [B3LYP/6-31G(d)]      |             |             |             | C                                      | -1.10818500 | 1.02534900  | 2.54549700  |
| C                                     | 1.40615800  | 0.86649100  | -0.03475100 | H                                      | -1.48970900 | 0.02740400  | 2.80324200  |
| C                                     | 0.70725800  | 2.09712400  | 0.14090100  | H                                      | -0.05618500 | 0.90104600  | 2.25509900  |
| C                                     | -0.65898600 | 2.15684900  | 0.20679200  | H                                      | -1.10803200 | 1.60957200  | 3.47905400  |
| C                                     | -1.43154100 | 0.97042300  | 0.07842800  | H                                      | -1.32960200 | 2.88972800  | -0.91288200 |
| C                                     | -0.76123400 | -0.28317500 | -0.09754000 | Structure 13c-TSCO_II [B3LYP/6-31G(d)] |             |             |             |
| C                                     | 2.87046100  | 0.96997000  | -0.19276500 | Cl                                     | 3.70028700  | -2.01306600 | -0.33022800 |
| O                                     | 3.67255100  | 0.06438200  | -0.33625500 | C                                      | -0.22679300 | 1.23648600  | 0.67494200  |
| O                                     | 1.23014800  | -1.54363500 | -0.33929300 | C                                      | -1.18330100 | 2.28687500  | 0.65499800  |
| C                                     | 1.97547300  | -2.12343000 | 0.74269100  | C                                      | -2.50031300 | 2.03564000  | 0.36020900  |
| H                                     | 1.29519800  | 3.00927200  | 0.21660700  | C                                      | -2.93058900 | 0.72761000  | 0.00938700  |
| H                                     | -1.16745600 | 3.10731300  | 0.34460000  | C                                      | -1.97296100 | -0.34132100 | -0.02882000 |
| H                                     | 2.22824700  | -3.13286200 | 0.41238600  | C                                      | 1.18537200  | 1.54791800  | 1.00726400  |
| H                                     | 1.35436600  | -2.17864000 | 1.64528100  | O                                      | 1.94507000  | 0.74567000  | 1.62833200  |
| H                                     | 2.89082600  | -1.56148300 | 0.93268000  | O                                      | 0.32618100  | -1.05878400 | 0.27664500  |
| C                                     | 0.66874300  | -0.31958500 | -0.13516700 | C                                      | 0.35486500  | -1.97568100 | 1.41285200  |
| C                                     | -1.53343200 | -1.46887600 | -0.22997500 | H                                      | -0.85604200 | 3.29434300  | 0.89851000  |
| C                                     | -2.90850800 | -1.41753600 | -0.18658300 | H                                      | -3.22918400 | 2.84144500  | 0.37322700  |
| H                                     | -3.48959200 | -2.32957000 | -0.29089800 | H                                      | 1.12014900  | -2.71433600 | 1.17193800  |
| C                                     | -3.57263200 | -0.18018900 | -0.00825700 | H                                      | -0.62215900 | -2.44974300 | 1.52327700  |
| H                                     | -4.65848800 | -0.15258000 | 0.02456700  | H                                      | 0.62516500  | -1.42093300 | 2.31396800  |
| C                                     | -2.85001700 | 0.98514000  | 0.12094500  | Mg                                     | 2.30632800  | -0.26193800 | -0.10924000 |
| H                                     | -3.35776800 | 1.93711000  | 0.25499800  | C                                      | 2.02773300  | 1.51525900  | -1.39464300 |
| H                                     | -1.01395100 | -2.40883200 | -0.37543000 | H                                      | 1.92893300  | 0.85190200  | -2.27681700 |
| H                                     | 3.22655500  | 2.02505900  | -0.18871400 | C                                      | -0.63815400 | -0.04990000 | 0.35459300  |
| Structure 13c_II [B3LYP/6-31G(d)]     |             |             |             | C                                      | -2.38904700 | -1.62838800 | -0.46889000 |
| C                                     | -1.54772600 | -0.47881300 | -0.10148400 | C                                      | -3.70210800 | -1.85666900 | -0.81166000 |
| C                                     | -1.11316900 | -1.81682800 | 0.11728800  | H                                      | -4.00803300 | -2.84197300 | -1.15142200 |
| C                                     | 0.21900100  | -2.11602100 | 0.22210300  | C                                      | -4.65809400 | -0.81430700 | -0.73577100 |
| C                                     | 1.20528900  | -1.09569400 | 0.09405600  | H                                      | -5.69158700 | -1.01272600 | -1.00486800 |
| C                                     | 0.79055100  | 0.25706900  | -0.13268900 | H                                      | -4.27768200 | 0.44827700  | -0.34144100 |
| C                                     | -2.99497600 | -0.20439200 | -0.23369900 | C                                      | -5.00353000 | 1.25649600  | -0.30337200 |
| O                                     | -3.85887600 | -1.05527000 | -0.10444400 | H                                      | -1.65506900 | -2.42196100 | -0.55554500 |
| O                                     | -1.00694200 | 1.83882000  | -0.42554100 | H                                      | 1.19582300  | 2.21877700  | -1.48484400 |
| C                                     | -1.20823100 | 2.61419000  | 0.76159000  | C                                      | 3.37424500  | 2.25139000  | -1.43508700 |
| H                                     | -1.87816400 | -2.58265400 | 0.19716500  | H                                      | 3.49236100  | 2.87521500  | -2.33509600 |
| H                                     | 0.54409100  | -3.13892400 | 0.39418300  | H                                      | 3.49680600  | 2.91805000  | -0.57044500 |
| H                                     | -1.48119200 | 3.61740100  | 0.42783100  | H                                      | 4.22952800  | 1.56139900  | -1.42367200 |
| H                                     | -0.29322100 | 2.66212300  | 1.36455500  | H                                      | 1.44699600  | 2.61520500  | 0.96250400  |
| H                                     | -2.01947900 | 2.19680400  | 1.37141300  | Structure 13c-TSOMe_I [B3LYP/6-31G(d)] |             |             |             |
| C                                     | -0.60662700 | 0.53801000  | -0.20714000 | Cl                                     | -4.18665900 | -1.39676900 | 0.18048500  |
| C                                     | 1.77335100  | 1.26937300  | -0.29257700 | C                                      | 0.15534000  | 1.61475100  | -0.52218900 |
| C                                     | 3.11330600  | 0.96172300  | -0.21025400 | C                                      | 1.36422600  | 2.38535600  | -0.47246900 |
| H                                     | 3.85875700  | 1.74166500  | -0.33816900 | C                                      | 2.57547200  | 1.80678500  | -0.24865700 |
| C                                     | 3.52690000  | -0.36984900 | 0.03219100  | C                                      | 2.68022000  | 0.38508900  | -0.06519300 |
| H                                     | 4.58694900  | -0.59982400 | 0.09645700  | C                                      | 1.50970600  | -0.43058400 | -0.13069100 |
| C                                     | 2.59416700  | -1.37382200 | 0.17628900  | C                                      | -1.08893400 | 2.28904600  | -0.58074300 |
| H                                     | 2.91112200  | -2.39900300 | 0.35106600  | O                                      | -2.22199900 | 1.75219000  | -0.40486500 |
| H                                     | 1.44828900  | 2.28284500  | -0.50177400 | O                                      | -0.76372900 | -0.62250800 | -0.96234400 |
| H                                     | -3.26162200 | 0.84149500  | -0.47689300 | C                                      | -0.64126300 | -0.72087700 | -2.40190100 |
| Structure 13c-TSCO_I [B3LYP/6-31G(d)] |             |             |             | H                                      | 1.28397000  | 3.46259900  | -0.60123200 |
| Cl                                    | -4.00638200 | -1.56639600 | 0.30421100  | H                                      | 3.48119000  | 2.40515200  | -0.21334200 |
| C                                     | 0.18797700  | 1.34248000  | -0.66684300 | H                                      | -1.44512400 | -1.38561000 | -2.72043600 |
| C                                     | 1.23843200  | 2.29747800  | -0.60527600 | H                                      | 0.33109800  | -1.15014000 | -2.65009600 |
| C                                     | 2.53139400  | 1.91036200  | -0.35494900 | H                                      | -0.75352000 | 0.26423000  | -2.86305200 |
| C                                     | 2.84705200  | 0.54900500  | -0.09685900 | Mg                                     | -2.33265300 | -0.13600600 | 0.22964500  |
| C                                     | 1.79610700  | -0.42879500 | -0.09933600 | C                                      | -0.75738200 | -0.13448400 | 1.87198200  |
| C                                     | -1.19178900 | 1.80094900  | -0.96059200 | H                                      | -0.12263900 | -1.01727400 | 1.96585200  |
| O                                     | -2.03721000 | 1.10238700  | -1.60918400 | H                                      | -1.72933100 | -0.41066500 | 2.34021800  |

|                                              |             |             |             |   |             |             |            |
|----------------------------------------------|-------------|-------------|-------------|---|-------------|-------------|------------|
| C                                            | 0.21885200  | 0.19775000  | -0.31617700 | H | -1.20078000 | -1.94810300 | 3.88344600 |
| C                                            | 1.63400200  | -1.83399500 | -0.01323700 | H | -2.80054400 | -0.16690900 | 3.08136200 |
| C                                            | 2.87180500  | -2.42153200 | 0.17580900  | H | -0.82213200 | 3.57382600  | 0.11564600 |
| H                                            | 2.95212500  | -3.50057000 | 0.26951200  |   |             |             |            |
| C                                            | 4.02633700  | -1.61918300 | 0.25497000  |   |             |             |            |
| H                                            | 4.99705600  | -2.08270000 | 0.40835600  |   |             |             |            |
| C                                            | 3.92967000  | -0.24468900 | 0.13600500  |   |             |             |            |
| H                                            | 4.82234900  | 0.37354000  | 0.18858300  |   |             |             |            |
| H                                            | 0.73847100  | -2.44481400 | -0.06467300 |   |             |             |            |
| C                                            | -0.19555500 | 1.09020900  | 2.56881200  |   |             |             |            |
| H                                            | -0.70191200 | 2.01372300  | 2.25223800  |   |             |             |            |
| H                                            | -0.30014700 | 1.03450100  | 3.66245200  |   |             |             |            |
| H                                            | 0.86948200  | 1.21917700  | 2.35012300  |   |             |             |            |
| H                                            | -1.06717300 | 3.37669000  | -0.74274500 |   |             |             |            |
| Structure 13c-TSOME_II [B3LYP/6-31G(d)]      |             |             |             |   |             |             |            |
| Cl                                           | 4.15340800  | -1.20204200 | 0.14718900  |   |             |             |            |
| C                                            | -0.20784700 | 1.83722300  | -0.05078700 |   |             |             |            |
| C                                            | -1.40768400 | 2.50466100  | -0.46385900 |   |             |             |            |
| C                                            | -2.59541700 | 1.84799300  | -0.57251700 |   |             |             |            |
| C                                            | -2.69540900 | 0.45815800  | -0.21944100 |   |             |             |            |
| C                                            | -1.53529000 | -0.24952700 | 0.22090300  |   |             |             |            |
| C                                            | 1.02458100  | 2.52512000  | -0.13449600 |   |             |             |            |
| O                                            | 2.17072100  | 1.98603300  | -0.07474100 |   |             |             |            |
| O                                            | 0.71996300  | -0.12789100 | 1.10136300  |   |             |             |            |
| C                                            | 0.60338100  | 0.27884100  | 2.48668800  |   |             |             |            |
| H                                            | -1.33868900 | 3.56046700  | -0.71657100 |   |             |             |            |
| H                                            | -3.49169100 | 2.36903900  | -0.89623200 |   |             |             |            |
| H                                            | 1.38592100  | -0.26438900 | 3.01778000  |   |             |             |            |
| H                                            | -0.38156700 | -0.00294900 | 2.86701500  |   |             |             |            |
| H                                            | 0.75420200  | 1.35733800  | 2.58198100  |   |             |             |            |
| Mg                                           | 2.28648200  | -0.00740500 | -0.19325800 |   |             |             |            |
| C                                            | 0.74061500  | -0.48309800 | -1.79274400 |   |             |             |            |
| C                                            | -0.25535600 | 0.42574800  | 0.21144600  |   |             |             |            |
| C                                            | -1.66273200 | -1.58817400 | 0.65668500  |   |             |             |            |
| C                                            | -2.89231900 | -2.22436900 | 0.63915300  |   |             |             |            |
| H                                            | -2.97569000 | -3.25342300 | 0.97608900  |   |             |             |            |
| C                                            | -4.03104500 | -1.53901800 | 0.17770400  |   |             |             |            |
| H                                            | -4.99376100 | -2.04249300 | 0.15744300  |   |             |             |            |
| C                                            | -3.93231700 | -0.22346500 | -0.24061800 |   |             |             |            |
| H                                            | -4.81624700 | 0.31065500  | -0.57997800 |   |             |             |            |
| H                                            | -0.77984100 | -2.11192300 | 1.00699100  |   |             |             |            |
| H                                            | 1.58860500  | -0.06457700 | -2.37571300 |   |             |             |            |
| C                                            | 0.68713700  | -2.00073100 | -1.92230200 |   |             |             |            |
| H                                            | 0.53461400  | -2.31547100 | -2.96715000 |   |             |             |            |
| H                                            | 1.60715200  | -2.48817900 | -1.57532500 |   |             |             |            |
| H                                            | -0.14763700 | -2.41880300 | -1.34752800 |   |             |             |            |
| H                                            | -0.14552500 | -0.00238900 | -2.20414700 |   |             |             |            |
| H                                            | 0.98717600  | 3.60936200  | -0.31564200 |   |             |             |            |
| Structure 13c·EtMgCl_I [B3LYP/6-31G(d)]      |             |             |             |   |             |             |            |
| C                                            | 0.38288100  | 1.76935300  | -0.02376100 |   |             |             |            |
| C                                            | 1.55540000  | 2.49717600  | 0.33501400  |   |             |             |            |
| C                                            | 2.78024000  | 1.88623600  | 0.38207400  |   |             |             |            |
| C                                            | 2.91065800  | 0.50101100  | 0.08501700  |   |             |             |            |
| C                                            | 1.74843100  | -0.25301800 | -0.29038500 |   |             |             |            |
| C                                            | -0.89463800 | 2.47628300  | 0.02352000  |   |             |             |            |
| O                                            | -2.01713600 | 1.96480100  | 0.00635900  |   |             |             |            |
| O                                            | -0.60835100 | -0.28453400 | -0.80319100 |   |             |             |            |
| C                                            | -0.73404900 | -0.35504900 | -2.25699400 |   |             |             |            |
| H                                            | 1.45574400  | 3.55026700  | 0.58517800  |   |             |             |            |
| H                                            | 3.66669700  | 2.44992300  | 0.65848000  |   |             |             |            |
| H                                            | -1.66650200 | -0.88688700 | -2.44075600 |   |             |             |            |
| H                                            | 0.12611600  | -0.88751600 | -2.66994300 |   |             |             |            |
| H                                            | -0.79053300 | 0.65710700  | -2.66747900 |   |             |             |            |
| Mg                                           | -2.45150000 | -0.07328900 | 0.42172800  |   |             |             |            |
| C                                            | -1.92388400 | -0.40299500 | 2.45631600  |   |             |             |            |
| C                                            | 0.50130100  | 0.42018300  | -0.36476800 |   |             |             |            |
| C                                            | 1.87398900  | -1.64480300 | -0.55630600 |   |             |             |            |
| C                                            | 3.10234500  | -2.25857400 | -0.47310600 |   |             |             |            |
| H                                            | 3.18974300  | -3.32356500 | -0.66623100 |   |             |             |            |
| C                                            | 4.25504100  | -1.51269800 | -0.12492000 |   |             |             |            |
| H                                            | 5.21802100  | -2.01179700 | -0.06595700 |   |             |             |            |
| C                                            | 4.16022400  | -0.16676200 | 0.15135200  |   |             |             |            |
| H                                            | 5.04243800  | 0.40234600  | 0.43188600  |   |             |             |            |
| H                                            | 0.98504800  | -2.21723500 | -0.79659000 |   |             |             |            |
| Cl                                           | -3.98754300 | -0.83570000 | -1.09877500 |   |             |             |            |
| H                                            | -1.15710500 | 0.32453800  | 2.77387300  |   |             |             |            |
| C                                            | -1.43766900 | -1.82179300 | 2.81354900  |   |             |             |            |
| H                                            | -2.19087700 | -2.58318300 | 2.56952900  |   |             |             |            |
| H                                            | -0.52683200 | -2.09588200 | 2.26105100  |   |             |             |            |
| Structure 13c·EtMgCl_II [B3LYP/6-31G(d)]     |             |             |             |   |             |             |            |
| C                                            | 0.30589600  | 1.26542000  | -1.01076100 |   |             |             |            |
| C                                            | 1.43121100  | 2.12611400  | -1.17350200 |   |             |             |            |
| C                                            | 2.68456900  | 1.73246800  | -0.78701200 |   |             |             |            |
| C                                            | 2.89303600  | 0.45399800  | -0.19853500 |   |             |             |            |
| C                                            | 1.78029700  | -0.43774300 | -0.03461100 |   |             |             |            |
| C                                            | -1.00748900 | 1.79092700  | -1.37715300 |   |             |             |            |
| O                                            | -2.10100500 | 1.29687400  | -1.08937100 |   |             |             |            |
| O                                            | -0.56201800 | -0.89639800 | -0.38722600 |   |             |             |            |
| C                                            | -0.66013900 | -1.82921200 | -1.50703900 |   |             |             |            |
| H                                            | 1.27133500  | 3.11295500  | -1.60014900 |   |             |             |            |
| H                                            | 3.53424100  | 2.39731400  | -0.91336200 |   |             |             |            |
| H                                            | -1.55116300 | -2.42345000 | -1.30946600 |   |             |             |            |
| H                                            | 0.24059100  | -2.44671900 | -1.54406100 |   |             |             |            |
| H                                            | -0.77881600 | -1.26916000 | -2.43894700 |   |             |             |            |
| Mg                                           | -2.43524800 | -0.08079500 | 0.48502500  |   |             |             |            |
| C                                            | -1.97588000 | 0.96127800  | 2.28635000  |   |             |             |            |
| H                                            | -1.16712600 | 0.43430000  | 2.81992400  |   |             |             |            |
| C                                            | 0.50147700  | -0.01115700 | -0.47913200 |   |             |             |            |
| C                                            | 1.98406400  | -1.70307400 | 0.58247400  |   |             |             |            |
| C                                            | 3.24004600  | -2.07605600 | 1.00194700  |   |             |             |            |
| H                                            | 3.38694300  | -3.03875700 | 1.48238400  |   |             |             |            |
| C                                            | 4.34394300  | -1.20689300 | 0.82272500  |   |             |             |            |
| H                                            | 5.32954400  | -1.51682600 | 1.15807500  |   |             |             |            |
| C                                            | 4.17326800  | 0.02929300  | 0.24000600  |   |             |             |            |
| H                                            | 5.01784400  | 0.70154800  | 0.11463600  |   |             |             |            |
| H                                            | 1.13178500  | -2.35418400 | 0.74172800  |   |             |             |            |
| Cl                                           | -3.88204900 | -1.72371600 | -0.19111500 |   |             |             |            |
| C                                            | -1.61232000 | 2.45328700  | 2.18161000  |   |             |             |            |
| H                                            | -2.43017700 | 3.04147800  | 1.74270800  |   |             |             |            |
| H                                            | -1.37949100 | 2.91862400  | 3.15392300  |   |             |             |            |
| H                                            | -0.72954000 | 2.62281400  | 1.54590700  |   |             |             |            |
| H                                            | -2.85149600 | 0.85902200  | 2.94719500  |   |             |             |            |
| H                                            | -0.99434500 | 2.73804900  | -1.94327000 |   |             |             |            |
| Structure 13c·EtMgCl_III [B3LYP/6-31G(d)]    |             |             |             |   |             |             |            |
| C                                            | 0.44251700  | 1.36158600  | -0.98253700 |   |             |             |            |
| C                                            | 1.56138900  | 2.24307500  | -1.04633700 |   |             |             |            |
| C                                            | 2.79520600  | 1.85303500  | -0.59769800 |   |             |             |            |
| C                                            | 2.98802800  | 0.55696100  | -0.04374100 |   |             |             |            |
| C                                            | 1.88185900  | -0.35565700 | 0.01981800  |   |             |             |            |
| C                                            | -0.85473200 | 1.88203600  | -1.40851200 |   |             |             |            |
| O                                            | -1.95736200 | 1.37724400  | -1.18407600 |   |             |             |            |
| O                                            | -0.42681600 | -0.83234500 | -0.49329300 |   |             |             |            |
| C                                            | -0.43980200 | -1.72502600 | -1.64963600 |   |             |             |            |
| H                                            | 1.41206800  | 3.24232800  | -1.44718800 |   |             |             |            |
| H                                            | 3.64018700  | 2.53377300  | -0.64829200 |   |             |             |            |
| H                                            | -1.33276600 | -2.33698100 | -1.53096800 |   |             |             |            |
| H                                            | 0.47095700  | -2.32874100 | -1.65169600 |   |             |             |            |
| H                                            | -0.50859600 | -1.13272100 | -2.56645900 |   |             |             |            |
| Mg                                           | -2.37202800 | -0.09111300 | 0.29924400  |   |             |             |            |
| C                                            | -2.00892400 | 0.81116600  | 2.19076500  |   |             |             |            |
| C                                            | 0.62573800  | 0.06914300  | -0.48636400 |   |             |             |            |
| C                                            | 2.06795400  | -1.63984700 | 0.60254500  |   |             |             |            |
| C                                            | 3.30198900  | -2.01066400 | 1.08420000  |   |             |             |            |
| H                                            | 3.43486500  | -2.98819200 | 1.53801200  |   |             |             |            |
| C                                            | 4.40079500  | -1.12041300 | 1.00368800  |   |             |             |            |
| H                                            | 5.36915600  | -1.42900300 | 1.38704000  |   |             |             |            |
| C                                            | 4.24611100  | 0.13383700  | 0.45635200  |   |             |             |            |
| H                                            | 5.08600800  | 0.82161100  | 0.04685500  |   |             |             |            |
| H                                            | 1.21799100  | -2.30788500 | 0.68648000  |   |             |             |            |
| Cl                                           | -3.75504900 | -1.68309200 | -0.60078200 |   |             |             |            |
| H                                            | -1.16003500 | 1.51311300  | -2.11959700 |   |             |             |            |
| H                                            | -0.82021300 | 2.83981600  | -1.95617500 |   |             |             |            |
| C                                            | -3.20410900 | 1.54848400  | 2.82812600  |   |             |             |            |
| H                                            | -4.06327900 | 0.88007500  | 2.97384800  |   |             |             |            |
| H                                            | -2.97413100 | 1.98305100  | 3.81544400  |   |             |             |            |
| H                                            | -3.55787700 | 2.37718600  | 2.19834300  |   |             |             |            |
| H                                            | -1.66485400 | 0.03299500  | 2.89247200  |   |             |             |            |
| Structure 1a·CH3MgCl(DME)_I [B3LYP/6-31G(d)] |             |             |             |   |             |             |            |
| C                                            | 0.84782000  | 1.87068200  | 0.04041600  |   |             |             |            |
| C                                            | 2.05589900  | 2.47726400  | 0.48764800  |   |             |             |            |
| C                                            | 3.23705400  | 1.78347200  | 0.51816600  |   |             |             |            |
| C                                            | 3.29265500  | 0.42449800  | 0.10879500  |   |             |             |            |
| C                                            | 2.09305100  | -0.21118200 | -0.34693700 |   |             |             |            |
| O                                            | -0.25344000 | -0.10828900 | -0.83969800 |   |             |             |            |

|                                                |             |             |             |                                                 |             |              |             |
|------------------------------------------------|-------------|-------------|-------------|-------------------------------------------------|-------------|--------------|-------------|
| C                                              | -0.50372000 | 0.05517800  | -2.26143200 | H                                               | -4.22926900 | -2.10436800  | -0.87295500 |
| H                                              | 2.00135400  | 3.51234400  | 0.80473300  | Structure 1'a·CH3MgCl (DME)_I [B3LYP/6-31G(d)]  |             |              |             |
| H                                              | 4.14689000  | 2.26709400  | 0.86340600  | C                                               | 0.92263500  | 0.32251900   | 0.15807700  |
| H                                              | -1.45398100 | -0.43992600 | -2.45759700 | C                                               | 0.76540000  | -1.04706000  | 0.52946400  |
| H                                              | 0.31317600  | -0.40452600 | -2.82523800 | C                                               | 1.84056000  | -1.89443600  | 0.56569000  |
| H                                              | -0.58587000 | 1.11749100  | -2.50105200 | C                                               | 3.13408500  | -1.44704900  | 0.18344000  |
| C                                              | 0.88831800  | 0.54892200  | -0.38004500 | C                                               | 3.30841500  | -0.08411500  | -0.21913100 |
| C                                              | 2.14032400  | -1.57543800 | -0.74495500 | C                                               | -0.31572300 | 1.13037800   | 0.11865200  |
| C                                              | 3.32573300  | -2.27461500 | -0.70156800 | O                                               | -1.43476500 | 0.62028100   | 0.00285400  |
| H                                              | 3.35116200  | -3.31715000 | -1.00631400 | Cl                                              | -2.68613100 | -2.09037400  | 1.66923300  |
| C                                              | 4.51485700  | -1.64581100 | -0.25954000 | H                                               | -0.22226700 | -1.40025400  | 0.81147400  |
| H                                              | 5.44288300  | -2.20990100 | -0.23154300 | H                                               | 1.70761100  | -2.92656500  | 0.87785200  |
| C                                              | 4.49597600  | -0.32801700 | 0.13818400  | C                                               | -4.58671800 | 1.48656400   | 1.09266100  |
| H                                              | 5.40486200  | 0.15739300  | 0.48436300  | H                                               | -4.31142800 | 1.95672900   | 2.05038900  |
| H                                              | 1.22513000  | -2.05862600 | -1.06893400 | H                                               | -5.63153000 | 1.16440100   | 1.22186700  |
| Mg                                             | -1.87403600 | -0.47522700 | 0.57115800  | C                                               | 2.18676300  | 0.80084500   | -0.19146400 |
| O                                              | -1.44636900 | -2.60908400 | 0.61304000  | C                                               | 4.58982400  | 0.35207000   | -0.65309600 |
| C                                              | -0.61595100 | -3.14973200 | 1.64379800  | H                                               | 5.65926700  | -0.51482800  | -0.65771300 |
| H                                              | -0.22897000 | -2.30787100 | 2.21740300  | C                                               | 6.63384200  | -0.17284700  | -0.99463300 |
| H                                              | -1.20454300 | -3.80211400 | 2.30113600  | C                                               | 5.49523100  | -1.85557700  | -0.23342200 |
| H                                              | 0.21133200  | -3.72234500 | 1.20470700  | C                                               | 6.34792600  | -2.52905000  | -0.23920100 |
| C                                              | -2.09277600 | -3.61946700 | -0.16829300 | H                                               | 4.26053300  | -2.31067400  | 0.17238800  |
| H                                              | -1.34515500 | -4.21801200 | -0.70572100 | H                                               | 4.12766700  | -3.34336900  | 0.48452200  |
| H                                              | -2.68478300 | -4.27590400 | 0.48182400  | H                                               | 4.70336800  | 1.37273200   | -1.00070400 |
| C                                              | -2.75134100 | -3.10464600 | -0.86743400 | O                                               | -0.16134800 | 2.44606200   | 0.22247900  |
| H                                              | -0.36273600 | 2.75236100  | 0.07820900  | C                                               | -1.35994100 | 3.25136700   | 0.15254300  |
| O                                              | -1.52575500 | 2.12043700  | -0.19669500 | H                                               | -1.02160600 | 4.27330200   | 0.32012600  |
| O                                              | -0.30395700 | 3.93711900  | 0.33636400  | H                                               | -0.15512300 | 3.15473000   | -0.83567200 |
| C                                              | -2.70992200 | 2.95288400  | -0.15512300 | H                                               | -2.07898500 | 2.94320000   | 0.91325600  |
| H                                              | -2.84570500 | 3.35232400  | 0.85210300  | H                                               | -4.61530700 | 2.30808800   | 0.35708400  |
| H                                              | -2.60740000 | 3.77801100  | -0.86316100 | Mg                                              | -3.29610200 | -0.12742900  | 0.59873600  |
| H                                              | -3.52639000 | 2.28792900  | -0.43186900 | O                                               | -3.88702600 | -0.87474600  | -1.29801300 |
| C                                              | -1.43347100 | 0.12306800  | 2.55223400  | C                                               | -3.54985100 | -2.17093300  | -1.80671000 |
| H                                              | -0.36003000 | 0.17826900  | 2.79511600  | H                                               | -2.98377000 | -2.67630200  | -1.02412700 |
| H                                              | -1.83370900 | 1.12580300  | 2.76767100  | H                                               | -4.46513700 | -2.73453900  | -2.02568400 |
| H                                              | -1.88044900 | -0.53965800 | 3.30973900  | H                                               | -2.94954900 | -2.07245500  | -2.72005800 |
| Cl                                             | -3.71191400 | -0.55877200 | -0.85756900 | C                                               | -4.71829100 | -0.111712700 | -2.17847300 |
| Structure 1a·CH3MgCl (DME)_II [B3LYP/6-31G(d)] |             |             |             |                                                 |             |              |             |
| C                                              | 0.41224700  | 1.91649600  | -0.03535800 | H                                               | -4.19409500 | 0.08086800   | -3.12246600 |
| C                                              | 1.45871600  | 2.69232300  | 0.53905100  | H                                               | -5.64774900 | -0.66282700  | -2.38394200 |
| C                                              | 2.73437200  | 2.20535000  | 0.65228600  | H                                               | -4.94773200 | 0.82030700   | -0.16705200 |
| C                                              | 3.05346700  | 0.89435700  | 0.20996100  | O                                               | 2.38650800  | 2.09477200   | -0.59897000 |
| C                                              | 2.01961800  | 0.08793000  | -0.36562800 | C                                               | 2.80465400  | 3.00284500   | 0.42895100  |
| O                                              | -0.26134600 | -0.18529300 | -1.05607900 | H                                               | 2.03181800  | 3.10433300   | 1.19681600  |
| C                                              | -0.41167000 | -0.02216500 | -2.48892400 | H                                               | 3.74315400  | 2.67093500   | 0.88898200  |
| H                                              | 1.20072600  | 3.68507500  | 0.88902300  | H                                               | 2.95922000  | 3.96424900   | -0.06510600 |
| H                                              | 3.51659800  | 2.81754100  | 1.09298300  | Structure 1'a·CH3MgCl (DME)_II [B3LYP/6-31G(d)] |             |              |             |
| H                                              | -1.19437000 | -0.71778700 | -2.78952100 | C                                               | 1.05987700  | 0.17116100   | -0.03574500 |
| H                                              | 0.53528900  | -0.26116200 | -2.98151400 | C                                               | 1.02733100  | -1.25462500  | -0.11143900 |
| H                                              | -0.71712800 | 1.00134600  | -2.71483500 | C                                               | 2.17766100  | -1.99150700  | -0.19741100 |
| C                                              | 0.71126200  | 0.63961300  | -0.48581700 | C                                               | 3.44794400  | -1.35486200  | -0.22353900 |
| C                                              | 2.33009700  | -1.23271400 | -0.79163200 | C                                               | 3.50839500  | 0.07321600   | -0.15134000 |
| C                                              | 3.60937400  | -1.72618600 | -0.66466000 | C                                               | -0.25790000 | 0.84509600   | 0.01653900  |
| H                                              | 3.83518600  | -2.73689400 | -0.99328300 | O                                               | -1.31541200 | 0.21709900   | 0.15614700  |
| C                                              | 4.63543200  | -0.92653300 | -0.10560500 | Cl                                              | -4.11976200 | 0.73227600   | -1.74087400 |
| H                                              | 5.64024900  | -1.32880500 | -0.01205200 | H                                               | 0.06024800  | -1.74477000  | -0.11551400 |
| C                                              | 4.36065100  | 0.35209200  | 0.32374800  | C                                               | 2.12707400  | -3.07502200  | -0.25953700 |
| H                                              | 5.14256300  | 0.96763500  | 0.76112200  | H                                               | -2.36336100 | -2.88231500  | -0.95183100 |
| H                                              | 1.54017000  | -1.84934100 | -1.20577300 | H                                               | -1.75919800 | -2.95703900  | -1.86921200 |
| Mg                                             | -1.96781800 | -0.94216300 | 0.07633200  | H                                               | -3.23352000 | -3.53557600  | -1.12176800 |
| O                                              | -0.96477700 | -2.79663200 | 0.54593600  | C                                               | 2.29651800  | 0.82322000   | -0.04431000 |
| C                                              | -0.16495800 | -3.02402800 | 1.71452700  | C                                               | 4.77462500  | 0.71734000   | -0.19656600 |
| H                                              | -0.19776400 | -2.10554900 | 2.29983500  | C                                               | 5.93153900  | -0.02249700  | -0.29378800 |
| H                                              | -0.58694000 | -3.85053900 | 2.29936600  | H                                               | 6.89461900  | 0.47868000   | -0.33200200 |
| H                                              | 0.86533100  | -3.26395600 | 1.42273800  | C                                               | 5.87442800  | -1.43577000  | -0.35285200 |
| C                                              | -1.12512900 | -3.96693400 | -0.25596800 | H                                               | 6.79500500  | -2.00781000  | -0.43001000 |
| H                                              | -0.15138700 | -4.31363000 | -0.62748000 | C                                               | 4.66035500  | -2.08547200  | -0.32160400 |
| H                                              | -1.59409400 | -4.76709900 | 0.33044200  | H                                               | 4.61257800  | -3.17003200  | -0.37608100 |
| H                                              | -1.77297800 | -3.69755600 | -1.09030500 | H                                               | 4.80800000  | 1.80057200   | -0.17222000 |
| C                                              | -0.92973000 | 2.58280600  | -0.06414100 | O                                               | -0.24232500 | 2.16503200   | -0.09533700 |
| O                                              | -1.92162100 | 1.83733100  | -0.60370300 | C                                               | -1.52165300 | 2.84635000   | -0.08999100 |
| O                                              | -1.10915000 | 3.70902000  | 0.34979000  | H                                               | -1.27928600 | 3.88765600   | -0.29963300 |
| C                                              | -3.23277600 | 2.44243800  | -0.54657300 | H                                               | -2.18618400 | 2.42947000   | -0.84914900 |
| H                                              | -3.52064100 | 2.59696800  | 0.49507900  | H                                               | -1.98551000 | 2.75112500   | 0.89559900  |
| H                                              | -3.23023500 | 3.39786400  | -1.07568300 | H                                               | -1.76907800 | -3.37725000  | -0.16512700 |
| H                                              | -3.89608100 | 1.72593900  | -1.02908700 | Mg                                              | -2.94304600 | -0.88162900  | -0.55077500 |
| Cl                                             | -1.91120200 | -0.01704600 | 2.19117700  | O                                               | -4.04810900 | -0.90502400  | 1.26989600  |
| C                                              | -3.44995000 | -1.48593400 | -1.34573400 | C                                               | -5.02401500 | 0.06941400   | 1.65455500  |
| H                                              | -3.98415700 | -0.62128600 | -1.77016100 | H                                               | -5.05597100 | 0.81111900   | 0.85612600  |
| H                                              | -3.10781200 | -2.06754300 | -2.21867700 | H                                               | -6.00727600 | -0.40607000  | 1.75821500  |

|                                             |             |             |             |                                              |             |             |             |
|---------------------------------------------|-------------|-------------|-------------|----------------------------------------------|-------------|-------------|-------------|
| H                                           | -4.73856000 | 0.53299400  | 2.60783700  | H                                            | 1.45311900  | 4.11660100  | 0.85932000  |
| C                                           | -3.95200400 | -2.00342900 | 2.17827500  | H                                            | 2.19857500  | 2.81270100  | 1.84198600  |
| H                                           | -3.61667700 | -1.65478400 | 3.16364700  | H                                            | 2.46276800  | 2.86747600  | 0.07498100  |
| H                                           | -4.92576500 | -2.49933200 | 2.27711900  | H                                            | 0.42225100  | 1.35621100  | -1.72858800 |
| H                                           | -3.22682100 | -2.70005200 | 1.75666100  | Mg                                           | 2.78387100  | -0.05462100 | -0.08381000 |
| O                                           | 2.42014700  | 2.18555300  | 0.00790700  | O                                            | 2.83310200  | -2.11805900 | -0.34945800 |
| C                                           | 2.37983000  | 2.76359300  | 1.31587800  | C                                            | 4.04929400  | -2.85308000 | -0.57893300 |
| H                                           | 1.41225600  | 2.58974300  | 1.79830500  | H                                            | 4.17294500  | -3.61095800 | -0.20335000 |
| H                                           | 3.18362300  | 2.36123700  | 1.94528500  | H                                            | 4.00680500  | -3.33606800 | -1.56215000 |
| H                                           | 2.52612400  | 3.83632600  | 1.17578400  | H                                            | 4.86574000  | -2.13214600 | -0.54549300 |
| Structure 1a-TSOMe (DME) [B3LYP/6-31G(d)]   |             |             |             |                                              |             |             |             |
| C                                           | -0.93055500 | 1.78779800  | -0.00755100 | H                                            | 1.66743700  | -2.95205600 | -0.38238600 |
| C                                           | -2.18737200 | 2.39161500  | -0.30235700 | H                                            | 1.57479200  | -3.42605900 | -1.36673500 |
| C                                           | -3.33583500 | 1.66457000  | -0.44257200 | H                                            | 1.74006200  | -3.72320100 | 0.39363500  |
| C                                           | -3.30975300 | 0.24635800  | -0.25616800 | H                                            | 0.80053400  | -2.31978800 | -0.19144000 |
| C                                           | -2.07565600 | -0.41002200 | 0.02783100  | O                                            | -1.71153200 | 1.85368200  | -0.94878100 |
| O                                           | 0.14458500  | -0.17701300 | 1.00641700  | C                                            | -2.21688700 | 3.05861400  | -0.35848900 |
| Cl                                          | 4.02609700  | -0.21790100 | -0.13089500 | H                                            | -3.27358500 | 2.94941300  | -0.08470800 |
| C                                           | -0.12374500 | 0.15093000  | 2.38431200  | H                                            | -1.62918600 | 3.33138600  | 0.52179500  |
| H                                           | -2.19371500 | 3.47097600  | -0.41605100 | H                                            | -2.11705100 | 3.83134600  | -1.12390100 |
| H                                           | -4.28122600 | 2.15169600  | -0.66228100 | Structure 1a-TSCO (DME) -II [B3LYP/6-31G(d)] |             |             |             |
| H                                           | 0.66637300  | -0.32464600 | 2.96952100  | C                                            | 0.79429800  | 0.16923100  | -0.53844100 |
| H                                           | -1.09863100 | -0.25129900 | 2.67116500  | C                                            | 0.95035500  | -1.04065100 | -1.27181100 |
| H                                           | -0.10774500 | 1.23264600  | 2.53726000  | C                                            | 2.14754500  | -1.70908700 | -1.31763600 |
| C                                           | 0.08304300  | -0.30926000 | -1.75469400 | C                                            | 3.27279800  | -1.22658800 | -0.60077000 |
| H                                           | -0.24679700 | -1.34704300 | -1.83760200 | C                                            | 3.13979600  | -0.01970500 | 0.15696000  |
| H                                           | 1.06208400  | -0.21840900 | -2.28922800 | C                                            | -0.57781200 | 0.79350100  | -0.56232300 |
| C                                           | -0.83132400 | 0.36276100  | 0.05039700  | O                                            | -1.51548200 | 0.21833100  | -1.25150900 |
| C                                           | -2.06949600 | -1.80372600 | 0.25669900  | Cl                                           | -2.96397400 | -2.82527700 | 0.63979400  |
| C                                           | -3.23951800 | -2.54086700 | 0.21196400  | H                                            | 0.09176100  | -1.41374500 | -1.81806100 |
| H                                           | -3.21601100 | -3.61256400 | 0.38926000  | H                                            | 2.24172500  | -2.62262800 | -1.89891000 |
| C                                           | -4.45992000 | -1.89837000 | -0.07582400 | C                                            | -1.05886800 | 0.45800700  | 1.59353600  |
| H                                           | -5.37976300 | -2.47617000 | -0.11676300 | H                                            | -0.72018100 | -0.48226700 | 2.05782700  |
| C                                           | -4.48994800 | -0.53700700 | -0.30630000 | H                                            | -1.97442600 | 0.79924200  | 2.11635100  |
| H                                           | -5.43192500 | -0.03912200 | -0.52375600 | C                                            | 1.89284800  | 0.68042900  | 0.14579500  |
| H                                           | -1.12262900 | -2.29545400 | 0.45611400  | C                                            | 4.24902500  | 0.43898300  | 0.91900700  |
| H                                           | -0.58668300 | 0.33655100  | -2.32049700 | C                                            | 5.44290900  | -0.24665800 | 0.90402800  |
| Mg                                          | 1.72960100  | -0.16983400 | -0.21421200 | H                                            | 6.28107000  | 0.11213900  | 1.49531900  |
| O                                           | 1.72258200  | -2.39040100 | -0.16325600 | C                                            | 5.58454100  | -1.42456600 | 0.13098100  |
| C                                           | 2.12515000  | -2.96566600 | 1.08537200  | H                                            | 6.53322300  | -1.95450800 | 0.12575900  |
| H                                           | 1.55509200  | -2.46176400 | 1.86807100  | C                                            | 4.52077700  | -1.90467100 | -0.59867300 |
| H                                           | 1.88195500  | -4.03514900 | 1.09638200  | H                                            | 4.61719700  | -2.81824400 | -1.18038900 |
| H                                           | 3.19860200  | -2.81946400 | 1.24840700  | H                                            | 4.12938300  | 1.32500700  | 1.53235700  |
| C                                           | 2.33271500  | -3.06239200 | -1.27496900 | O                                            | -0.52520100 | 2.15200600  | -0.56473400 |
| H                                           | 2.06584100  | -4.12590300 | -1.25186400 | C                                            | -1.76228600 | 2.83716800  | -0.74815700 |
| H                                           | 1.93169600  | -2.60929200 | -2.18287600 | H                                            | -1.52339200 | 3.89907000  | -0.66784600 |
| H                                           | 3.42049100  | -2.94022100 | -1.24610000 | H                                            | -2.19212300 | 2.62150700  | -1.73005600 |
| C                                           | 0.21495200  | 2.67195200  | 0.02144500  | H                                            | -2.47697100 | 2.55850200  | 0.03469100  |
| O                                           | 0.19934700  | 3.88730800  | 0.03504900  | H                                            | -0.29796300 | 1.20776800  | 1.79609700  |
| O                                           | 1.47027000  | 2.00846800  | -0.00802800 | Mg                                           | -2.38465400 | -0.67323400 | 0.24484300  |
| C                                           | 2.59713200  | 2.92839900  | -0.02757500 | O                                            | -4.26830600 | 0.24950800  | 0.14733800  |
| H                                           | 3.48405700  | 2.29981900  | -0.03610200 | C                                            | -5.25381400 | -0.08186600 | 1.14017000  |
| H                                           | 2.54309000  | 3.55580200  | -0.91871500 | H                                            | -6.03634300 | 0.68559400  | 1.14452800  |
| H                                           | 2.56349400  | 3.56199700  | 0.85990400  | H                                            | -5.68225600 | -1.06893400 | 0.93934400  |
| Structure 1a-TSCO (DME) -I [B3LYP/6-31G(d)] |             |             |             |                                              |             |             |             |
| C                                           | -0.69627400 | 0.29856500  | 0.59899500  | H                                            | -4.74625400 | -0.09594400 | 2.10586700  |
| C                                           | -0.84619800 | -0.87223800 | 1.39508000  | C                                            | -4.82634800 | 0.35104100  | -1.17356400 |
| C                                           | -2.01926100 | -1.58457300 | 1.42574200  | H                                            | -5.28111300 | -0.60191200 | -1.46866800 |
| C                                           | -3.12472400 | -1.18884300 | 0.62866500  | H                                            | -5.58112700 | 1.14572900  | -1.19251300 |
| C                                           | -3.00009600 | -0.01773800 | -0.18466800 | H                                            | -4.00177200 | 0.59874900  | -1.84280800 |
| C                                           | 0.65148000  | 0.97474900  | 0.66053900  | O                                            | 1.80605400  | 1.83124100  | 0.89798400  |
| O                                           | 1.58584300  | 0.42655100  | 1.36982300  | C                                            | 2.24752100  | 3.02472400  | 0.24138700  |
| Cl                                          | 4.96277900  | 0.55748300  | -0.28272200 | H                                            | 3.29485600  | 2.93819800  | -0.07328600 |
| H                                           | -0.00137000 | -1.16810800 | 2.00702600  | H                                            | 1.61686500  | 3.24503600  | -0.62441700 |
| H                                           | -2.11304900 | -2.46092400 | 2.06244700  | H                                            | 2.15502200  | 3.82571800  | 0.97863700  |
| C                                           | 1.22117200  | 0.65872900  | -1.48867100 | Structure 16 [B3LYP/6-31G(d)]                |             |             |             |
| H                                           | 0.93216300  | -0.32415400 | -1.89157400 | C                                            | 1.71482200  | 1.18332300  | 0.00001700  |
| H                                           | 2.10837000  | 1.01490600  | -2.04911400 | C                                            | 0.85050400  | 2.30645500  | 0.00002700  |
| C                                           | -1.78275800 | 0.73457600  | -0.15236000 | C                                            | -0.51412000 | 2.15387400  | -0.00000800 |
| C                                           | -4.08749600 | 0.35754400  | -1.01983400 | C                                            | -1.08759200 | 0.85187400  | -0.00002200 |
| C                                           | -5.25344800 | -0.37499900 | -1.02631400 | C                                            | -0.23260300 | -0.29572600 | -0.00003300 |
| H                                           | -6.07497700 | -0.07991000 | -1.67338800 | O                                            | 1.93043300  | -1.23783400 | -0.00001200 |
| C                                           | -5.38791200 | -1.51749700 | -0.20080500 | C                                            | 3.34336700  | -1.12126800 | 0.00000100  |
| H                                           | -6.31519000 | -2.08392700 | -0.21200100 | H                                            | 1.28860500  | 3.30104800  | 0.00003100  |
| C                                           | -4.34426200 | -1.91634800 | 0.60325700  | H                                            | -1.17079400 | 3.01987200  | -0.00002500 |
| H                                           | -4.43637600 | -2.80085200 | 1.22916700  | H                                            | 3.72866000  | -2.14256800 | -0.00019000 |
| H                                           | -3.97169100 | 1.21773100  | -1.66950700 | H                                            | 3.70309600  | -0.59636000 | 0.89473600  |
| O                                           | 0.53846500  | 2.32774300  | 0.66737900  | C                                            | 3.70312700  | -0.59613500 | -0.89460200 |
| C                                           | 1.74553700  | 3.06579900  | 0.88104500  | H                                            | 1.18663800  | -0.09294500 | -0.00001800 |
|                                             |             |             |             | C                                            | -0.80825100 | -1.59214900 | 0.00000200  |
|                                             |             |             |             | C                                            | -2.17729900 | -1.75122600 | 0.00002900  |

|   |             |             |             |
|---|-------------|-------------|-------------|
| H | -2.60728000 | -2.74926100 | 0.00007400  |
| C | -3.02789900 | -0.62109000 | 0.00000300  |
| H | -4.10615700 | -0.75766100 | 0.00001600  |
| C | -2.49328300 | 0.64810000  | -0.00001500 |
| H | -3.14403000 | 1.51950500  | -0.00002100 |
| H | -0.15106000 | -2.45447200 | 0.00005800  |
| H | 2.78666800  | 1.34337400  | 0.00012500  |

Structure 16 ·CH3MgCl (DME) [B3LYP/6-31G(d)]

|    |             |             |             |
|----|-------------|-------------|-------------|
| C  | -0.18890700 | -1.22058900 | -1.70432800 |
| C  | -1.43837700 | -1.84232100 | -1.93978800 |
| C  | -2.57050800 | -1.38409800 | -1.30665900 |
| C  | -2.50975800 | -0.28945700 | -0.40225600 |
| C  | -1.24955100 | 0.34731500  | -0.14944500 |
| O  | 1.13617300  | 0.44398000  | -0.60509200 |
| Cl | 2.78680300  | 2.20112700  | 1.72366200  |
| C  | 1.41494600  | 1.56575200  | -1.47866100 |
| H  | -1.49377900 | -2.68395700 | -2.62392500 |
| H  | -3.53138000 | -1.85933300 | -1.48687100 |
| H  | 2.30692300  | 2.05122400  | -1.08393000 |
| H  | 0.57715200  | 2.26765400  | -1.45732700 |
| H  | 1.57616300  | 1.20229400  | -2.49830000 |
| C  | 1.58731200  | -1.75044100 | 2.08836700  |
| H  | 2.32459200  | -2.19738100 | 2.77341900  |
| H  | 1.29157700  | -2.54978000 | 1.39077500  |
| C  | -0.11061500 | -0.15957000 | -0.83608900 |
| C  | -1.18668700 | 1.43351100  | 0.76518100  |
| C  | -2.32856000 | 1.87227900  | 1.39859500  |
| H  | -2.26953600 | 2.69936700  | 2.10027000  |
| C  | -3.57631800 | 1.25192700  | 1.14896800  |
| H  | -4.46636200 | 1.61065000  | 1.65849000  |
| C  | -3.66284200 | 0.19587200  | 0.27051300  |
| H  | -4.61819400 | -0.28732000 | 0.08069200  |
| H  | -0.23234900 | 1.90945000  | 0.97161000  |
| H  | 0.71073400  | -1.57454800 | -2.19865000 |
| H  | 0.69660500  | -1.54844400 | 2.70120800  |
| Mg | 2.30871100  | 0.00206400  | 1.16016000  |
| O  | 4.14054900  | -0.51846000 | 0.18259100  |
| C  | 5.26915200  | 0.34390400  | -0.01160100 |
| H  | 4.95826600  | 1.34151100  | 0.29858000  |
| H  | 6.10889800  | 0.00608400  | 0.60804700  |
| H  | 5.56785600  | 0.33912800  | -1.06768500 |
| C  | 4.42608800  | -1.89079900 | -0.10351000 |
| H  | 4.67959400  | -2.01162000 | -1.16451600 |
| H  | 5.26178800  | -2.24067100 | 0.51501400  |
| H  | 3.52928800  | -2.46104400 | 0.14051700  |

Structure 16-TSOMe (DME) [B3LYP/6-31G(d)]

|    |             |             |             |
|----|-------------|-------------|-------------|
| C  | 0.94700200  | -2.16148600 | -0.05939100 |
| C  | 2.24410800  | -2.65715800 | -0.26282700 |
| C  | 3.34296500  | -1.82732400 | -0.36305500 |
| C  | 3.16263700  | -0.42390700 | -0.22440700 |
| C  | 1.85084700  | 0.12394000  | -0.03517600 |
| O  | -0.38541400 | -0.37687800 | 0.97296600  |
| Cl | -2.60894100 | 2.57993400  | -0.07794000 |
| C  | 0.02775400  | -0.49494900 | 2.34582000  |
| H  | 2.37704100  | -3.73574100 | -0.32737000 |
| H  | 4.34249300  | -2.22758700 | -0.50403900 |
| H  | -0.84516400 | -0.26166000 | 2.96054700  |
| H  | 0.83581600  | 0.20968600  | 2.55806800  |
| H  | 0.36915200  | -1.51529400 | 2.53629500  |
| C  | -0.37460900 | -0.37678500 | -1.66232400 |
| H  | -0.85899500 | 0.55165600  | -2.06773800 |
| H  | -1.02968500 | -1.23703300 | -1.87122600 |
| C  | 0.68743800  | -0.76816100 | -0.05776100 |
| C  | 1.70621300  | 1.52278700  | 0.11026400  |
| C  | 2.79721200  | 2.37155600  | 0.08907300  |
| H  | 2.65700000  | 3.44269400  | 0.20376400  |
| C  | 4.09088800  | 1.83687900  | -0.09054100 |
| H  | 4.95275600  | 2.49948900  | -0.11015900 |
| C  | 4.26219400  | 0.47819200  | -0.24595900 |
| H  | 5.25926100  | 0.06607700  | -0.38627900 |
| H  | 0.71448100  | 1.95000100  | 0.24901700  |
| H  | 0.10699200  | -2.85039000 | -0.00490200 |
| H  | 0.49732200  | -0.47814000 | -2.30461100 |
| Mg | -1.73228600 | 0.50724200  | -0.11789400 |
| O  | -3.36844200 | -0.75270100 | -0.09068500 |
| C  | -4.70136300 | -0.31883500 | -0.42459300 |
| H  | -4.65988500 | 0.76423800  | -0.53945300 |
| H  | -5.02198900 | -0.79637600 | -1.35739900 |
| H  | -5.38608400 | -0.58616100 | 0.38768800  |

|   |             |             |             |
|---|-------------|-------------|-------------|
| C | -3.27681900 | -2.16519000 | 0.15022100  |
| H | -3.53619600 | -2.72036300 | -0.75836600 |
| H | -2.24680600 | -2.37617300 | 0.43823700  |
| H | -3.95603000 | -2.44542500 | 0.96332800  |

Structure 17 [B3LYP/6-31G(d)]

|   |             |             |             |
|---|-------------|-------------|-------------|
| C | 1.00325500  | 0.02928800  | 0.00000800  |
| C | 0.66028800  | 1.40983800  | 0.00000600  |
| C | -0.65932000 | 1.79243200  | 0.00000200  |
| C | -1.70506500 | 0.82886200  | 0.00000000  |
| C | -1.36049300 | -0.56314000 | 0.00000200  |
| C | 2.41701700  | -0.43965900 | 0.00001200  |
| O | 2.76042600  | -1.60614200 | -0.00000100 |
| H | 1.45062300  | 2.15152100  | 0.00000800  |
| H | -0.92157900 | 2.84772100  | 0.00000100  |
| C | 0.00739200  | -0.92927000 | 0.00000500  |
| C | -2.40125500 | -1.53184000 | -0.00000100 |
| C | -3.72179300 | -1.14481300 | -0.00000400 |
| H | -4.50983000 | -1.89272700 | -0.00000600 |
| C | -4.06185700 | 0.23095100  | -0.00000500 |
| H | -5.10828300 | 0.52402400  | -0.00000800 |
| C | -3.07721700 | 1.19383800  | -0.00000300 |
| H | -2.33889500 | 2.24931000  | -0.00000400 |
| H | -2.13355300 | -2.58559600 | 0.00000100  |
| O | 3.30038700  | 0.58711600  | 0.00000000  |
| C | 4.68302800  | 0.20283400  | -0.00001300 |
| H | 5.24610300  | 1.13674200  | -0.00002200 |
| H | 4.91775900  | -0.38833500 | 0.88925500  |
| H | 4.91774100  | -0.38834100 | -0.88928100 |
| H | 0.28952600  | -1.97802400 | 0.00000700  |

Structure 17 ·CH3MgCl (DME) [B3LYP/6-31G(d)]

|    |             |             |             |
|----|-------------|-------------|-------------|
| C  | 1.12422900  | 1.28477600  | -0.10954400 |
| C  | 2.15370100  | 2.27006300  | -0.17337100 |
| C  | 3.47082200  | 1.88677400  | -0.17597600 |
| C  | 3.83885300  | 0.51282100  | -0.11239000 |
| C  | 2.80297900  | -0.47587800 | -0.04614000 |
| C  | -0.29871000 | 1.66475000  | -0.10493900 |
| O  | -1.24557900 | 0.87271200  | -0.05420200 |
| Cl | -1.20622900 | -2.58680900 | 0.39234700  |
| H  | 1.88481800  | 3.31895300  | -0.21872100 |
| H  | 4.25636000  | 2.63676000  | -0.22486200 |
| C  | -3.40028400 | 0.18326900  | 2.47531900  |
| H  | -2.71724400 | 0.27335000  | 3.33404800  |
| H  | -4.23765800 | -0.43619400 | 2.83218400  |
| C  | 1.45015800  | -0.06115500 | -0.04977100 |
| C  | 3.15373300  | -1.85235800 | 0.02303700  |
| C  | 4.47635200  | -2.23339300 | 0.02386900  |
| H  | 4.74080300  | -3.28552300 | 0.07877800  |
| C  | 5.50068200  | -1.25677800 | -0.04433400 |
| H  | 6.54065200  | -1.57225400 | -0.04264800 |
| C  | 5.19085400  | 0.08473600  | -0.11044600 |
| H  | 5.97979300  | 0.83120600  | -0.16068600 |
| H  | 2.35686300  | -2.58917800 | 0.07922400  |
| O  | -0.50663000 | 2.98179900  | -0.17321700 |
| C  | -1.87670300 | 3.42705600  | -0.13663900 |
| H  | -1.82231200 | 4.51536200  | -0.13709300 |
| H  | -2.41300000 | 3.06924700  | -1.01928800 |
| H  | -2.37158700 | 3.06127700  | 0.76563700  |
| H  | 0.66843900  | -0.81499500 | -0.00181700 |
| H  | -3.81541100 | 1.19410800  | 2.32320200  |
| Mg | -2.41421200 | -0.63597000 | 0.78747900  |
| O  | -3.83987800 | -0.76746400 | -0.78890300 |
| C  | -3.71215900 | -1.60086600 | -1.94719500 |
| H  | -2.73360400 | -2.07693800 | -1.88685800 |
| H  | -4.49545000 | -2.36873700 | -1.94350400 |
| H  | -3.79560300 | -0.99361400 | -2.85761400 |
| C  | -5.12197200 | -0.14748400 | -0.67666400 |
| H  | -5.29541500 | 0.52535500  | -1.52676800 |
| H  | -5.91062300 | -0.90993400 | -0.64879700 |
| H  | -5.12189200 | 0.41478100  | 0.25763500  |

Structure 17-TSCO (DME) [B3LYP/6-31G(d)]

|    |             |             |             |
|----|-------------|-------------|-------------|
| C  | -0.93835100 | -1.00982700 | -0.05798900 |
| C  | -1.76096100 | -1.89633000 | 0.69161700  |
| C  | -3.09547500 | -1.62509400 | 0.86857400  |
| C  | -3.69012400 | -0.45903500 | 0.31257500  |
| C  | -2.86634600 | 0.43236400  | -0.44801400 |
| C  | 0.52173500  | -1.29416900 | -0.26602700 |
| O  | 1.21432000  | -0.56907900 | -1.09244200 |
| Cl | 1.88525300  | 2.84496900  | 0.64119400  |

|    |             |             |             |
|----|-------------|-------------|-------------|
| H  | -1.32323300 | -2.79385300 | 1.11399300  |
| H  | -3.71899600 | -2.30801000 | 1.44098500  |
| C  | 1.17355200  | -0.76427400 | 1.77807100  |
| H  | 0.60356800  | 0.04284900  | 2.26087800  |
| H  | 2.21088200  | -0.74413100 | 2.17125800  |
| C  | -1.49178800 | 0.12369400  | -0.61848300 |
| C  | -3.45162900 | 1.59850500  | -1.01113300 |
| C  | -4.78857400 | 1.87241100  | -0.82941100 |
| H  | -5.22449700 | 2.76899800  | -1.26156600 |
| C  | -5.60275200 | 0.99043300  | -0.07723200 |
| H  | -6.65666700 | 1.21775700  | 0.05910300  |
| C  | -5.06507000 | -0.14862800 | 0.48031400  |
| H  | -5.68856600 | -0.82660100 | 1.05860700  |
| H  | -2.82201800 | 2.27452700  | -1.58442700 |
| O  | 0.75255500  | -2.63673300 | -0.22438300 |
| C  | 2.07333400  | -3.06976600 | -0.53021800 |
| H  | 2.06735700  | -4.15322200 | -0.39880600 |
| H  | 2.34325900  | -2.82005900 | -1.56006100 |
| H  | 2.79700900  | -2.61868100 | 0.16010000  |
| H  | -0.87144200 | 0.78912000  | -1.21150600 |
| H  | 0.75333000  | -1.70913800 | 2.11586900  |
| Mg | 1.97676300  | 0.62235300  | 0.23755000  |
| O  | 4.01201700  | 0.31803900  | -0.12228500 |
| C  | 4.99722500  | 1.11117200  | 0.56138900  |
| H  | 5.92060500  | 0.53023700  | 0.66739500  |
| H  | 5.18816500  | 2.03647800  | 0.00829500  |
| H  | 4.59219400  | 1.35936500  | 1.54243000  |
| C  | 4.42824400  | -0.07168000 | -1.44102100 |
| H  | 4.65330600  | 0.81632000  | -2.04371600 |
| H  | 5.31831700  | -0.70805500 | -1.37361100 |
| H  | 3.59771700  | -0.62308500 | -1.88133000 |
